# Supplementary material for: Epigenetic and evolutionary features of ape subterminal heterochromatin
Source: Genome Res. 2026 Jan;36(1):38–49. doi: 10.1101/gr.280987.125 (PMC12758386; doi:10.1101/gr.280987.125)
Supplement: Supplement 2 [file Supplemental_Tables_S1-S7.xlsx]

## Sheet: Overview
pg	Supplemental Tables
1	Supplemental Table S1. Accessions of genomes
2	Supplemental Table S2. Subterminal cap coordinates
3	Supplemental Table S3. Spacer SD coordinates
4	Supplemental Table S4. Iso-Seq read mapping statistics
5	Supplemental Table S5. Transcript data mapping to subterminal regions
6	Supplemental Table S6. Novel gene and normalized read counts
7	Supplemental Table S7. Gene ontology enrichment

## Sheet: 1
Species	Name	Sex	BioSample ID	BioProject ID
Chimpanzee	AG18354	M	SAMN30216104	PRJNA916736
Bonobo	PR00251	M	SAMN13935689	PRJNA942951
Gorilla	Jim	M	SAMN04003007	PRJNA942267
Bornean orangutan	AG05252	M	SAMN10521809	PRJNA916742
Sumatran orangutan	AG06213	M	SAMN10521808	PRJNA916743
Siamang	Jambi	M	SAMN30216103	PRJNA916729
Human	CHM13	F + M(Y)	SAMN03255769	PRJNA559484
Human	HG002	M	SAMN03283347	PRJNA727431

## Sheet: 2
Species	Chromosome	Chromosome number	Start	End	Subterminal cap ID
Chimpanzee	CM054442.2	chr8_hap1_hsa10	3508	12635833	hsa10_hap1_p-arm
Chimpanzee	CM054419.2	chr8_hap2_hsa10	6301	13672962	hsa10_hap2_p-arm
Chimpanzee	CM054443.2	chr9_hap1_hsa11	12881	4261115	hsa11_hap1_p-arm
Chimpanzee	CM054420.2	chr9_hap2_hsa11	6118	4175983	hsa11_hap2_p-arm
Chimpanzee	CM054444.2	chr10_hap1_hsa12	9395	7093694	hsa12_hap1_p-arm
Chimpanzee	CM054421.2	chr10_hap2_hsa12	8130	5731161	hsa12_hap2_p-arm
Chimpanzee	CM054448.2	chr14_hap1_hsa13	45617284	52003170	hsa13_hap1_Ints
Chimpanzee	CM054448.2	chr14_hap1_hsa13	3652408	5093942	hsa13_hap1_p-arm
Chimpanzee	CM054448.2	chr14_hap1_hsa13	9368928	10490943	hsa13_hap1_p-arm
Chimpanzee	CM054425.2	chr14_hap2_hsa13	42726258	49715468	hsa13_hap2_Ints
Chimpanzee	CM054425.2	chr14_hap2_hsa13	3824368	4364999	hsa13_hap2_p-arm
Chimpanzee	CM054425.2	chr14_hap2_hsa13	6277722	10832107	hsa13_hap2_p-arm
Chimpanzee	CM054449.2	chr15_hap1_hsa14	8098516	9428111	hsa14_hap1_p-arm
Chimpanzee	CM054449.2	chr15_hap1_hsa14	12748574	14015352	hsa14_hap1_p-arm
Chimpanzee	CM054426.2	chr15_hap2_hsa14	8190506	11320304	hsa14_hap2_p-arm
Chimpanzee	CM054450.2	chr16_hap1_hsa15	4985	5082537	hsa15_hap1_p-arm
Chimpanzee	CM054427.2	chr16_hap2_hsa15	11106	9624869	hsa15_hap2_p-arm
Chimpanzee	CM054427.2	chr16_hap2_hsa15	22495024	23833712	hsa15_hap2_p-arm
Chimpanzee	CM054452.2	chr18_hap1_hsa16	7369	2318617	hsa16_hap1_p-arm
Chimpanzee	CM054452.2	chr18_hap1_hsa16	88416064	94519508	hsa16_hap1_q-arm
Chimpanzee	CM054429.2	chr18_hap2_hsa16	7398	7600145	hsa16_hap2_p-arm
Chimpanzee	CM054429.2	chr18_hap2_hsa16	94430860	100836724	hsa16_hap2_q-arm
Chimpanzee	CM054453.2	chr19_hap1_hsa17	9278	10557213	hsa17_hap1_p-arm
Chimpanzee	CM054453.2	chr19_hap1_hsa17	96653435	99588077	hsa17_hap1_q-arm
Chimpanzee	CM054430.2	chr19_hap2_hsa17	5115	8781234	hsa17_hap2_p-arm
Chimpanzee	CM054430.2	chr19_hap2_hsa17	95158601	97066587	hsa17_hap2_q-arm
Chimpanzee	CM054451.2	chr17_hap1_hsa18	8036009	9192116	hsa18_hap1_p-arm
Chimpanzee	CM054428.2	chr17_hap2_hsa18	3397720	5202057	hsa18_hap2_p-arm
Chimpanzee	CM054428.2	chr17_hap2_hsa18	6783296	7952404	hsa18_hap2_p-arm
Chimpanzee	CM054428.2	chr17_hap2_hsa18	9377618	10158183	hsa18_hap2_p-arm
Chimpanzee	CM054454.2	chr20_hap1_hsa19	4923	2444115	hsa19_hap1_p-arm
Chimpanzee	CM054454.2	chr20_hap1_hsa19	61577641	68073140	hsa19_hap1_q-arm
Chimpanzee	CM054431.2	chr20_hap2_hsa19	9481	6853731	hsa19_hap2_p-arm
Chimpanzee	CM054431.2	chr20_hap2_hsa19	66956840	73828291	hsa19_hap2_q-arm
Chimpanzee	CM054455.2	chr21_hap1_hsa20	17389	6785509	hsa20_hap1_p-arm
Chimpanzee	CM054455.2	chr21_hap1_hsa20	70766427	78110418	hsa20_hap1_q-arm
Chimpanzee	CM054432.2	chr21_hap2_hsa20	5056	4986742	hsa20_hap2_p-arm
Chimpanzee	CM054432.2	chr21_hap2_hsa20	71032088	78787817	hsa20_hap2_q-arm
Chimpanzee	CM054456.2	chr22_hap1_hsa21	3338094	4527108	hsa21_hap1_p-arm
Chimpanzee	CM054456.2	chr22_hap1_hsa21	6339443	9810504	hsa21_hap1_p-arm
Chimpanzee	CM054456.2	chr22_hap1_hsa21	47454653	51345201	hsa21_hap1_q-arm
Chimpanzee	CM054433.2	chr22_hap2_hsa21	4832377	5651203	hsa21_hap2_p-arm
Chimpanzee	CM054433.2	chr22_hap2_hsa21	44871908	49547341	hsa21_hap2_q-arm
Chimpanzee	CM068906.1	chr23_hap1_hsa22	8711135	10707668	hsa22_hap1_p-arm
Chimpanzee	CM068906.1	chr23_hap1_hsa22	53045785	59516181	hsa22_hap1_q-arm
Chimpanzee	CM068904.1	chr23_hap2_hsa22	6215324	7796303	hsa22_hap2_p-arm
Chimpanzee	CM068904.1	chr23_hap2_hsa22	46330446	55309175	hsa22_hap2_q-arm
Chimpanzee	CM054446.2	chr12_hap1_hsa2a	4835	9729033	hsa2A_hap1_p-arm
Chimpanzee	CM054423.2	chr12_hap2_hsa2a	3599	15169792	hsa2A_hap2_p-arm
Chimpanzee	CM054447.2	chr13_hap1_hsa2b	8913	14168301	hsa2B_hap1_p-arm
Chimpanzee	CM054424.2	chr13_hap2_hsa2b	4116	10587697	hsa2B_hap2_p-arm
Chimpanzee	CM068905.1	chr2_hap1_hsa3	9260	3701568	hsa3_hap1_p-arm
Chimpanzee	CM068903.1	chr2_hap2_hsa3	16398	2413775	hsa3_hap2_p-arm
Chimpanzee	CM054439.2	chr5_hap1_hsa6	5259	5851120	hsa6_hap1_p-arm
Chimpanzee	CM054416.2	chr5_hap2_hsa6	7608	4603703	hsa6_hap2_p-arm
Chimpanzee	CM054440.2	chr6_hap1_hsa7	112185101	118079859	hsa7_hap1_Ints
Chimpanzee	CM054440.2	chr6_hap1_hsa7	7115	5762040	hsa7_hap1_p-arm
Chimpanzee	CM054417.2	chr6_hap2_hsa7	108669004	112270905	hsa7_hap2_Ints
Chimpanzee	CM054417.2	chr6_hap2_hsa7	5331	3535892	hsa7_hap2_p-arm
Chimpanzee	CM054441.2	chr7_hap1_hsa8	5226	7031729	hsa8_hap1_p-arm
Chimpanzee	CM054418.2	chr7_hap2_hsa8	10975	14728574	hsa8_hap2_p-arm
Chimpanzee	CM054445.2	chr11_hap1_hsa9	115835047	118858361	hsa9_hap1_q-arm
Chimpanzee	CM054422.2	chr11_hap2_hsa9	118871200	121986366	hsa9_hap2_q-arm
Chimpanzee	CM054457.2	chrX_hap1_hsaX	27462	685536	hsaX_hap1_p-arm
Bonobo	CM055480.2	chr8_mat_hsa10	9453	12303509	hsa10_hap1_p-arm
Bonobo	CM054468.2	chr8_pat_hsa10	13229	14233758	hsa10_hap2_p-arm
Bonobo	CM054493.2	chr9_mat_hsa11	10238	1592830	hsa11_hap1_p-arm
Bonobo	CM055481.2	chr9_pat_hsa11	7538	2415897	hsa11_hap2_p-arm
Bonobo	CM055482.2	chr10_mat_hsa12	10271	5488095	hsa12_hap1_p-arm
Bonobo	CM054470.2	chr10_pat_hsa12	10209	4795294	hsa12_hap2_p-arm
Bonobo	CM054498.2	chr14_mat_hsa13	39762013	49131799	hsa13_hap1_Ints
Bonobo	CM054498.2	chr14_mat_hsa13	340839	1304739	hsa13_hap1_p-arm
Bonobo	CM055486.2	chr14_pat_hsa13	46082302	47854511	hsa13_hap2_Ints
Bonobo	CM055487.2	chr15_mat_hsa14	8900470	12620413	hsa14_hap1_p-arm
Bonobo	CM054475.2	chr15_pat_hsa14	14530443	17410854	hsa14_hap2_p-arm
Bonobo	CM054500.2	chr16_mat_hsa15	7379	8213165	hsa15_hap1_p-arm
Bonobo	CM054500.2	chr16_mat_hsa15	18266821	19838224	hsa15_hap1_p-arm
Bonobo	CM055488.2	chr16_pat_hsa15	7510	4917252	hsa15_hap2_p-arm
Bonobo	CM055488.2	chr16_pat_hsa15	14624267	16043057	hsa15_hap2_p-arm
Bonobo	CM054502.2	chr18_mat_hsa16	6312	3996948	hsa16_hap1_p-arm
Bonobo	CM054502.2	chr18_mat_hsa16	105968033	109402475	hsa16_hap1_q-arm
Bonobo	CM054503.2	chr19_mat_hsa17	6870	9180454	hsa17_hap1_p-arm
Bonobo	CM055491.2	chr19_pat_hsa17	8085	7622945	hsa17_hap2_p-arm
Bonobo	CM055491.2	chr19_pat_hsa17	99919145	100780617	hsa17_hap2_q-arm
Bonobo	CM054504.2	chr20_mat_hsa19	7963	3722350	hsa19_hap1_p-arm
Bonobo	CM054504.2	chr20_mat_hsa19	66682552	70544095	hsa19_hap1_q-arm
Bonobo	CM055492.2	chr20_pat_hsa19	8397	4486053	hsa19_hap2_p-arm
Bonobo	CM055492.2	chr20_pat_hsa19	64916249	70709501	hsa19_hap2_q-arm
Bonobo	CM055493.2	chr21_mat_hsa20	12716	1138715	hsa20_hap1_p-arm
Bonobo	CM055493.2	chr21_mat_hsa20	70246052	76782750	hsa20_hap1_q-arm
Bonobo	CM054481.2	chr21_pat_hsa20	10260	1878598	hsa20_hap2_p-arm
Bonobo	CM054481.2	chr21_pat_hsa20	69851383	78211269	hsa20_hap2_q-arm
Bonobo	CM054506.2	chr22_mat_hsa21	40764503	44437597	hsa21_hap1_q-arm
Bonobo	CM055494.2	chr22_pat_hsa21	42945404	48473107	hsa21_hap2_q-arm
Bonobo	CM068947.1	chr23_mat_hsa22	273382	1107137	hsa22_hap1_p-arm
Bonobo	CM068947.1	chr23_mat_hsa22	23000474	25154632	hsa22_hap1_p-arm
Bonobo	CM068947.1	chr23_mat_hsa22	66054235	69172507	hsa22_hap1_q-arm
Bonobo	CM068945.1	chr23_pat_hsa22	16855897	19191846	hsa22_hap2_p-arm
Bonobo	CM068945.1	chr23_pat_hsa22	60724062	65042268	hsa22_hap2_q-arm
Bonobo	CM055484.2	chr12_mat_hsa2a	6622	14580299	hsa2A_hap1_p-arm
Bonobo	CM054472.2	chr12_pat_hsa2a	9093	13141695	hsa2A_hap2_p-arm
Bonobo	CM055485.2	chr13_mat_hsa2b	8221	15216655	hsa2B_hap1_p-arm
Bonobo	CM054473.2	chr13_pat_hsa2b	8724	18173325	hsa2B_hap2_p-arm
Bonobo	CM054489.2	chr5_mat_hsa6	6217	10664493	hsa6_hap1_p-arm
Bonobo	CM055477.2	chr5_pat_hsa6	6116	14691840	hsa6_hap2_p-arm
Bonobo	CM055478.2	chr6_mat_hsa7	120649110	139555913	hsa7_hap1_Ints
Bonobo	CM055478.2	chr6_mat_hsa7	8782	4780396	hsa7_hap1_p-arm
Bonobo	CM054466.2	chr6_pat_hsa7	112292118	123612024	hsa7_hap2_Ints
Bonobo	CM054466.2	chr6_pat_hsa7	9295	3672313	hsa7_hap2_p-arm
Bonobo	CM054491.2	chr7_mat_hsa8	11984	12132981	hsa8_hap1_p-arm
Bonobo	CM055479.2	chr7_pat_hsa8	11115	14836273	hsa8_hap2_p-arm
Bonobo	CM055495.2	chrX_mat_hsaX	156694126	160232271	hsaX_hap1_q-arm
Bonobo	CM055496.2	chrY_pat_hsaY	126380	911734	hsaY_hap2_p-arm
Gorilla	CM054582.2	chr1_mat_hsa1	12540	6631033	hsa1_hap1_p-arm
Gorilla	CM054582.2	chr1_mat_hsa1	245209581	249582632	hsa1_hap1_q-arm
Gorilla	CM055446.2	chr1_pat_hsa1	13397	5535160	hsa1_hap2_p-arm
Gorilla	CM055446.2	chr1_pat_hsa1	241579359	243835808	hsa1_hap2_q-arm
Gorilla	CM054590.2	chr8_mat_hsa10	10398	8388910	hsa10_hap1_p-arm
Gorilla	CM054590.2	chr8_mat_hsa10	144639586	151550378	hsa10_hap1_q-arm
Gorilla	CM055454.2	chr8_pat_hsa10	13439	8319882	hsa10_hap2_p-arm
Gorilla	CM055454.2	chr8_pat_hsa10	146489047	150795270	hsa10_hap2_q-arm
Gorilla	CM054591.2	chr9_mat_hsa11	14083	9031170	hsa11_hap1_p-arm
Gorilla	CM054591.2	chr9_mat_hsa11	146062136	148876654	hsa11_hap1_q-arm
Gorilla	CM055455.2	chr9_pat_hsa11	10736	5373931	hsa11_hap2_p-arm
Gorilla	CM055455.2	chr9_pat_hsa11	144214193	147863740	hsa11_hap2_q-arm
Gorilla	CM055456.2	chr10_mat_hsa12	9359	15507589	hsa12_hap1_p-arm
Gorilla	CM055456.2	chr10_mat_hsa12	149520535	154217949	hsa12_hap1_q-arm
Gorilla	CM054568.2	chr10_pat_hsa12	8209	14963533	hsa12_hap2_p-arm
Gorilla	CM054568.2	chr10_pat_hsa12	149435256	159458034	hsa12_hap2_q-arm
Gorilla	CM054596.2	chr14_mat_hsa13	134187083	140775277	hsa13_hap1_q-arm
Gorilla	CM055460.2	chr14_pat_hsa13	129303957	132005803	hsa13_hap2_q-arm
Gorilla	CM054597.2	chr15_mat_hsa14	7844	15472606	hsa14_hap1_p-arm
Gorilla	CM054597.2	chr15_mat_hsa14	139935687	145815717	hsa14_hap1_q-arm
Gorilla	CM055461.2	chr15_pat_hsa14	7764	11481686	hsa14_hap2_p-arm
Gorilla	CM055461.2	chr15_pat_hsa14	124919076	131679779	hsa14_hap2_q-arm
Gorilla	CM054598.2	chr16_mat_hsa15	104571769	105773185	hsa15_hap1_q-arm
Gorilla	CM055462.2	chr16_pat_hsa15	104033428	107906169	hsa15_hap2_q-arm
Gorilla	CM054600.2	chr18_mat_hsa16	9264	3816157	hsa16_hap1_p-arm
Gorilla	CM054600.2	chr18_mat_hsa16	123178906	130710751	hsa16_hap1_q-arm
Gorilla	CM055464.2	chr18_pat_hsa16	9650	2841911	hsa16_hap2_p-arm
Gorilla	CM055464.2	chr18_pat_hsa16	121510407	131342505	hsa16_hap2_q-arm
Gorilla	CM054601.2	chr19_mat_hsa5x17	7400	11779420	hsa17_hap1_p-arm
Gorilla	CM054601.2	chr19_mat_hsa5x17	108328917	112720201	hsa17_hap1_q-arm
Gorilla	CM055465.2	chr19_pat_hsa5x17	10532	15249603	hsa17_hap2_p-arm
Gorilla	CM055465.2	chr19_pat_hsa5x17	112924778	120447406	hsa17_hap2_q-arm
Gorilla	CM055463.2	chr17_mat_hsa18	110461100	116047618	hsa18_hap1_q-arm
Gorilla	CM054575.2	chr17_pat_hsa18	102064587	107354154	hsa18_hap2_q-arm
Gorilla	CM055466.2	chr20_mat_hsa19	6626	5402075	hsa19_hap1_p-arm
Gorilla	CM055466.2	chr20_mat_hsa19	71036979	80303887	hsa19_hap1_q-arm
Gorilla	CM054578.2	chr20_pat_hsa19	9005	7454404	hsa19_hap2_p-arm
Gorilla	CM054578.2	chr20_pat_hsa19	69326896	76010501	hsa19_hap2_q-arm
Gorilla	CM054603.2	chr21_mat_hsa20	6585	9881742	hsa20_hap1_p-arm
Gorilla	CM054603.2	chr21_mat_hsa20	75482617	84478860	hsa20_hap1_q-arm
Gorilla	CM055467.2	chr21_pat_hsa20	8424	9952369	hsa20_hap2_p-arm
Gorilla	CM055467.2	chr21_pat_hsa20	76662328	84434812	hsa20_hap2_q-arm
Gorilla	CM055468.2	chr22_mat_hsa21	48678645	59498265	hsa21_hap1_q-arm
Gorilla	CM054580.2	chr22_pat_hsa21	47358146	58616944	hsa21_hap2_q-arm
Gorilla	CM068951.1	chr23_mat_hsa22	48894677	54762103	hsa22_hap1_q-arm
Gorilla	CM068949.1	chr23_pat_hsa22	48498410	58740169	hsa22_hap2_q-arm
Gorilla	CM054594.2	chr12_mat_hsa2a	145604317	151420860	hsa2A_hap1_q-arm
Gorilla	CM055458.2	chr12_pat_hsa2a	140882027	145891758	hsa2A_hap2_q-arm
Gorilla	CM055457.2	chr11_mat_hsa2b	11076	15059675	hsa2B_hap1_p-arm
Gorilla	CM055457.2	chr11_mat_hsa2b	145498381	150235715	hsa2B_hap1_q-arm
Gorilla	CM054569.2	chr11_pat_hsa2b	10523	8972149	hsa2B_hap2_p-arm
Gorilla	CM054569.2	chr11_pat_hsa2b	139389515	144014255	hsa2B_hap2_q-arm
Gorilla	CM068942.1	chr2_mat_hsa3	10247	9466318	hsa3_hap1_p-arm
Gorilla	CM068942.1	chr2_mat_hsa3	211153494	215064801	hsa3_hap1_q-arm
Gorilla	CM068950.1	chr2_pat_hsa3	9938	9084796	hsa3_hap2_p-arm
Gorilla	CM068950.1	chr2_pat_hsa3	211876084	215245360	hsa3_hap2_q-arm
Gorilla	CM054585.2	chr3_mat_hsa4	8208	8865899	hsa4_hap1_p-arm
Gorilla	CM054585.2	chr3_mat_hsa4	209196058	211529653	hsa4_hap1_q-arm
Gorilla	CM055449.2	chr3_pat_hsa4	6637	7644626	hsa4_hap2_p-arm
Gorilla	CM055449.2	chr3_pat_hsa4	212524079	215364096	hsa4_hap2_q-arm
Gorilla	CM054586.2	chr4_mat_hsa17x5	10665	9101222	hsa5_hap1_p-arm
Gorilla	CM054586.2	chr4_mat_hsa17x5	183939144	193743874	hsa5_hap1_q-arm
Gorilla	CM055450.2	chr4_pat_hsa17x5	11322	8694292	hsa5_hap2_p-arm
Gorilla	CM055450.2	chr4_pat_hsa17x5	185478912	195324532	hsa5_hap2_q-arm
Gorilla	CM055451.2	chr5_mat_hsa6	10798	17587290	hsa6_hap1_p-arm
Gorilla	CM055451.2	chr5_mat_hsa6	195574868	199439332	hsa6_hap1_q-arm
Gorilla	CM054563.2	chr5_pat_hsa6	8882	10006061	hsa6_hap2_p-arm
Gorilla	CM054563.2	chr5_pat_hsa6	186549850	188208876	hsa6_hap2_q-arm
Gorilla	CM055452.2	chr6_mat_hsa7	10267	6601210	hsa7_hap1_p-arm
Gorilla	CM055452.2	chr6_mat_hsa7	169065139	170793360	hsa7_hap1_q-arm
Gorilla	CM054564.2	chr6_pat_hsa7	10701	8299463	hsa7_hap2_p-arm
Gorilla	CM054564.2	chr6_pat_hsa7	171395858	176468005	hsa7_hap2_q-arm
Gorilla	CM054589.2	chr7_mat_hsa8	17092	10179038	hsa8_hap1_p-arm
Gorilla	CM054589.2	chr7_mat_hsa8	156386998	165058824	hsa8_hap1_q-arm
Gorilla	CM055453.2	chr7_pat_hsa8	7487	4470846	hsa8_hap2_p-arm
Gorilla	CM055453.2	chr7_pat_hsa8	151474829	158527604	hsa8_hap2_q-arm
Gorilla	CM055469.2	chrX_mat_hsaX	8875	9544179	hsaX_hap1_p-arm
Gorilla	CM055469.2	chrX_mat_hsaX	168016846	177550564	hsaX_hap1_q-arm
Gorilla	CM055470.2	chrY_pat_hsaY	11052	6850068	hsaY_hap2_p-arm

## Sheet: 3
Species	Chromosome	Chromosome number	Start	End	ID	Strand	Length
Chimpanzee	CM054414.2	chr3_hap2_hsa4	130468	160834	spacer-1	+	30366
Chimpanzee	CM054415.2	chr4_hap2_hsa5	843597	874359	spacer-2	+	30762
Chimpanzee	CM054415.2	chr4_hap2_hsa5	178987225	179019611	spacer-3	-	32386
Chimpanzee	CM054416.2	chr5_hap2_hsa6	83054	115376	spacer-4	+	32322
Chimpanzee	CM054416.2	chr5_hap2_hsa6	520507	552703	spacer-5	+	32196
Chimpanzee	CM054416.2	chr5_hap2_hsa6	1666816	1698980	spacer-6	+	32164
Chimpanzee	CM054416.2	chr5_hap2_hsa6	1955645	1987712	spacer-7	+	32067
Chimpanzee	CM054416.2	chr5_hap2_hsa6	2571529	2603812	spacer-8	+	32283
Chimpanzee	CM054416.2	chr5_hap2_hsa6	2915575	2944831	spacer-9	+	29256
Chimpanzee	CM054416.2	chr5_hap2_hsa6	3140253	3172300	spacer-10	+	32047
Chimpanzee	CM054416.2	chr5_hap2_hsa6	4491036	4521949	spacer-11	+	30913
Chimpanzee	CM054416.2	chr5_hap2_hsa6	179078691	179109461	spacer-12	-	30770
Chimpanzee	CM054417.2	chr6_hap2_hsa7	79568	110503	spacer-13	+	30935
Chimpanzee	CM054417.2	chr6_hap2_hsa7	210508	242644	spacer-14	+	32136
Chimpanzee	CM054417.2	chr6_hap2_hsa7	684455	716455	spacer-15	+	32000
Chimpanzee	CM054417.2	chr6_hap2_hsa7	2034560	2065499	spacer-16	+	30939
Chimpanzee	CM054417.2	chr6_hap2_hsa7	2623028	2653797	spacer-17	+	30769
Chimpanzee	CM054417.2	chr6_hap2_hsa7	3235085	3267271	spacer-18	+	32186
Chimpanzee	CM054417.2	chr6_hap2_hsa7	3345047	3377272	spacer-19	+	32225
Chimpanzee	CM054417.2	chr6_hap2_hsa7	3420257	3451039	spacer-20	+	30782
Chimpanzee	CM054417.2	chr6_hap2_hsa7	109472368	109504508	spacer-21	+	32140
Chimpanzee	CM054417.2	chr6_hap2_hsa7	109548554	109579105	spacer-22	+	30551
Chimpanzee	CM054417.2	chr6_hap2_hsa7	109723969	109756095	spacer-23	+	32126
Chimpanzee	CM054417.2	chr6_hap2_hsa7	109850074	109882199	spacer-24	+	32125
Chimpanzee	CM054417.2	chr6_hap2_hsa7	109978270	110010421	spacer-25	+	32151
Chimpanzee	CM054417.2	chr6_hap2_hsa7	110148808	110180992	spacer-26	+	32184
Chimpanzee	CM054417.2	chr6_hap2_hsa7	110356700	110388842	spacer-27	+	32142
Chimpanzee	CM054417.2	chr6_hap2_hsa7	110542298	110574501	spacer-28	+	32203
Chimpanzee	CM054417.2	chr6_hap2_hsa7	110713486	110745546	spacer-29	+	32060
Chimpanzee	CM054417.2	chr6_hap2_hsa7	110804676	110836796	spacer-30	+	32120
Chimpanzee	CM054417.2	chr6_hap2_hsa7	111015695	111047830	spacer-31	+	32135
Chimpanzee	CM054417.2	chr6_hap2_hsa7	111070291	111102390	spacer-32	+	32099
Chimpanzee	CM054417.2	chr6_hap2_hsa7	111202338	111234565	spacer-33	+	32227
Chimpanzee	CM054417.2	chr6_hap2_hsa7	111323864	111355993	spacer-34	+	32129
Chimpanzee	CM054417.2	chr6_hap2_hsa7	111508998	111541148	spacer-35	+	32150
Chimpanzee	CM054417.2	chr6_hap2_hsa7	111693189	111725335	spacer-36	+	32146
Chimpanzee	CM054417.2	chr6_hap2_hsa7	111832293	111862182	spacer-37	+	29889
Chimpanzee	CM054417.2	chr6_hap2_hsa7	112049561	112080410	spacer-38	+	30849
Chimpanzee	CM054418.2	chr7_hap2_hsa8	109434	141605	spacer-39	+	32171
Chimpanzee	CM054418.2	chr7_hap2_hsa8	249672	277258	spacer-40	+	27586
Chimpanzee	CM054418.2	chr7_hap2_hsa8	418019	450152	spacer-41	+	32133
Chimpanzee	CM054418.2	chr7_hap2_hsa8	1058599	1090738	spacer-42	+	32139
Chimpanzee	CM054418.2	chr7_hap2_hsa8	1587509	1619765	spacer-43	+	32256
Chimpanzee	CM054418.2	chr7_hap2_hsa8	1876963	1906973	spacer-44	+	30010
Chimpanzee	CM054418.2	chr7_hap2_hsa8	2241728	2273861	spacer-45	+	32133
Chimpanzee	CM054418.2	chr7_hap2_hsa8	2805052	2837278	spacer-46	+	32226
Chimpanzee	CM054418.2	chr7_hap2_hsa8	3073795	3103804	spacer-47	+	30009
Chimpanzee	CM054418.2	chr7_hap2_hsa8	3449681	3481814	spacer-48	+	32133
Chimpanzee	CM054418.2	chr7_hap2_hsa8	4029697	4061922	spacer-49	+	32225
Chimpanzee	CM054418.2	chr7_hap2_hsa8	4299622	4329637	spacer-50	+	30015
Chimpanzee	CM054418.2	chr7_hap2_hsa8	4711303	4743461	spacer-51	+	32158
Chimpanzee	CM054418.2	chr7_hap2_hsa8	4823010	4855190	spacer-52	+	32180
Chimpanzee	CM054418.2	chr7_hap2_hsa8	5437816	5469932	spacer-53	+	32116
Chimpanzee	CM054418.2	chr7_hap2_hsa8	5671880	5703998	spacer-54	+	32118
Chimpanzee	CM054418.2	chr7_hap2_hsa8	6147849	6179988	spacer-55	+	32139
Chimpanzee	CM054418.2	chr7_hap2_hsa8	6385113	6417237	spacer-56	+	32124
Chimpanzee	CM054418.2	chr7_hap2_hsa8	6480460	6512630	spacer-57	+	32170
Chimpanzee	CM054418.2	chr7_hap2_hsa8	6592442	6622995	spacer-58	+	30553
Chimpanzee	CM054418.2	chr7_hap2_hsa8	7438206	7470389	spacer-59	+	32183
Chimpanzee	CM054418.2	chr7_hap2_hsa8	7601415	7633614	spacer-60	+	32199
Chimpanzee	CM054418.2	chr7_hap2_hsa8	8082764	8114946	spacer-61	+	32182
Chimpanzee	CM054418.2	chr7_hap2_hsa8	9594003	9626124	spacer-62	+	32121
Chimpanzee	CM054418.2	chr7_hap2_hsa8	9818575	9849176	spacer-63	+	30601
Chimpanzee	CM054418.2	chr7_hap2_hsa8	10207896	10240042	spacer-64	+	32146
Chimpanzee	CM054418.2	chr7_hap2_hsa8	10669876	10702060	spacer-65	+	32184
Chimpanzee	CM054418.2	chr7_hap2_hsa8	11408371	11440514	spacer-66	+	32143
Chimpanzee	CM054418.2	chr7_hap2_hsa8	12005008	12037154	spacer-67	+	32146
Chimpanzee	CM054418.2	chr7_hap2_hsa8	13953954	13986094	spacer-68	+	32140
Chimpanzee	CM054418.2	chr7_hap2_hsa8	14064031	14096164	spacer-69	+	32133
Chimpanzee	CM054418.2	chr7_hap2_hsa8	14172758	14204899	spacer-70	+	32141
Chimpanzee	CM054418.2	chr7_hap2_hsa8	14346839	14378986	spacer-71	+	32147
Chimpanzee	CM054418.2	chr7_hap2_hsa8	14554256	14579435	spacer-72	+	25179
Chimpanzee	CM054418.2	chr7_hap2_hsa8	14728573	14759473	spacer-73	+	30900
Chimpanzee	CM054418.2	chr7_hap2_hsa8	164679210	164710001	spacer-74	-	30791
Chimpanzee	CM054419.2	chr8_hap2_hsa10	78157	109115	spacer-75	+	30958
Chimpanzee	CM054419.2	chr8_hap2_hsa10	396584	425911	spacer-76	+	29327
Chimpanzee	CM054419.2	chr8_hap2_hsa10	643283	665042	spacer-77	+	21759
Chimpanzee	CM054419.2	chr8_hap2_hsa10	1657571	1690011	spacer-78	+	32440
Chimpanzee	CM054419.2	chr8_hap2_hsa10	2035216	2067332	spacer-79	+	32116
Chimpanzee	CM054419.2	chr8_hap2_hsa10	2169500	2201379	spacer-80	+	31879
Chimpanzee	CM054419.2	chr8_hap2_hsa10	2259429	2291540	spacer-81	+	32111
Chimpanzee	CM054419.2	chr8_hap2_hsa10	4011336	4043463	spacer-82	+	32127
Chimpanzee	CM054419.2	chr8_hap2_hsa10	4372432	4404643	spacer-83	+	32211
Chimpanzee	CM054419.2	chr8_hap2_hsa10	4574010	4606155	spacer-84	+	32145
Chimpanzee	CM054419.2	chr8_hap2_hsa10	4888394	4920277	spacer-85	+	31883
Chimpanzee	CM054419.2	chr8_hap2_hsa10	5022977	5055083	spacer-86	+	32106
Chimpanzee	CM054419.2	chr8_hap2_hsa10	5387470	5419479	spacer-87	+	32009
Chimpanzee	CM054419.2	chr8_hap2_hsa10	5578985	5611422	spacer-88	+	32437
Chimpanzee	CM054419.2	chr8_hap2_hsa10	6319406	6351831	spacer-89	+	32425
Chimpanzee	CM054419.2	chr8_hap2_hsa10	6570265	6602384	spacer-90	+	32119
Chimpanzee	CM054419.2	chr8_hap2_hsa10	6675412	6707530	spacer-91	+	32118
Chimpanzee	CM054419.2	chr8_hap2_hsa10	6900614	6932918	spacer-92	+	32304
Chimpanzee	CM054419.2	chr8_hap2_hsa10	7253304	7285347	spacer-93	+	32043
Chimpanzee	CM054419.2	chr8_hap2_hsa10	7720163	7752346	spacer-94	+	32183
Chimpanzee	CM054419.2	chr8_hap2_hsa10	8109329	8141754	spacer-95	+	32425
Chimpanzee	CM054419.2	chr8_hap2_hsa10	8497195	8529500	spacer-96	+	32305
Chimpanzee	CM054419.2	chr8_hap2_hsa10	8846553	8878596	spacer-97	+	32043
Chimpanzee	CM054419.2	chr8_hap2_hsa10	9320349	9352532	spacer-98	+	32183
Chimpanzee	CM054419.2	chr8_hap2_hsa10	9727455	9759880	spacer-99	+	32425
Chimpanzee	CM054419.2	chr8_hap2_hsa10	9977294	10009413	spacer-100	+	32119
Chimpanzee	CM054419.2	chr8_hap2_hsa10	10080969	10113147	spacer-101	+	32178
Chimpanzee	CM054419.2	chr8_hap2_hsa10	10314277	10346581	spacer-102	+	32304
Chimpanzee	CM054419.2	chr8_hap2_hsa10	10666967	10699010	spacer-103	+	32043
Chimpanzee	CM054419.2	chr8_hap2_hsa10	11133826	11166009	spacer-104	+	32183
Chimpanzee	CM054419.2	chr8_hap2_hsa10	11522992	11555417	spacer-105	+	32425
Chimpanzee	CM054419.2	chr8_hap2_hsa10	11912457	11944760	spacer-106	+	32303
Chimpanzee	CM054419.2	chr8_hap2_hsa10	12275904	12307947	spacer-107	+	32043
Chimpanzee	CM054419.2	chr8_hap2_hsa10	12723171	12755418	spacer-108	+	32247
Chimpanzee	CM054419.2	chr8_hap2_hsa10	13152021	13184135	spacer-109	+	32114
Chimpanzee	CM054419.2	chr8_hap2_hsa10	13672961	13704051	spacer-110	+	31090
Chimpanzee	CM054420.2	chr9_hap2_hsa11	83725	116080	spacer-111	+	32355
Chimpanzee	CM054420.2	chr9_hap2_hsa11	249943	282117	spacer-112	+	32174
Chimpanzee	CM054420.2	chr9_hap2_hsa11	1009371	1041421	spacer-113	+	32050
Chimpanzee	CM054420.2	chr9_hap2_hsa11	1302253	1334373	spacer-114	+	32120
Chimpanzee	CM054420.2	chr9_hap2_hsa11	1843841	1875965	spacer-115	+	32124
Chimpanzee	CM054420.2	chr9_hap2_hsa11	2267134	2299337	spacer-116	+	32203
Chimpanzee	CM054420.2	chr9_hap2_hsa11	2687650	2718204	spacer-117	+	30554
Chimpanzee	CM054420.2	chr9_hap2_hsa11	2824786	2855384	spacer-118	+	30598
Chimpanzee	CM054420.2	chr9_hap2_hsa11	3317728	3349907	spacer-119	+	32179
Chimpanzee	CM054420.2	chr9_hap2_hsa11	3589250	3621452	spacer-120	+	32202
Chimpanzee	CM054420.2	chr9_hap2_hsa11	3798868	3831067	spacer-121	+	32199
Chimpanzee	CM054420.2	chr9_hap2_hsa11	4061955	4092891	spacer-122	+	30936
Chimpanzee	CM054421.2	chr10_hap2_hsa12	83385	115515	spacer-123	+	32130
Chimpanzee	CM054421.2	chr10_hap2_hsa12	1162161	1194306	spacer-124	+	32145
Chimpanzee	CM054421.2	chr10_hap2_hsa12	1728320	1760501	spacer-125	+	32181
Chimpanzee	CM054421.2	chr10_hap2_hsa12	2121544	2153671	spacer-126	+	32127
Chimpanzee	CM054421.2	chr10_hap2_hsa12	3088411	3120575	spacer-127	+	32164
Chimpanzee	CM054421.2	chr10_hap2_hsa12	3535933	3568070	spacer-128	+	32137
Chimpanzee	CM054421.2	chr10_hap2_hsa12	3715391	3744226	spacer-129	+	28835
Chimpanzee	CM054421.2	chr10_hap2_hsa12	4033897	4066094	spacer-130	+	32197
Chimpanzee	CM054421.2	chr10_hap2_hsa12	4497771	4529908	spacer-131	+	32137
Chimpanzee	CM054421.2	chr10_hap2_hsa12	4661434	4693554	spacer-132	+	32120
Chimpanzee	CM054421.2	chr10_hap2_hsa12	5016720	5048828	spacer-133	+	32108
Chimpanzee	CM054421.2	chr10_hap2_hsa12	5293574	5325717	spacer-134	+	32143
Chimpanzee	CM054421.2	chr10_hap2_hsa12	5455088	5486089	spacer-135	+	31001
Chimpanzee	CM054422.2	chr11_hap2_hsa9	119330	151710	spacer-136	+	32380
Chimpanzee	CM054422.2	chr11_hap2_hsa9	61914421	61945173	spacer-137	-	30752
Chimpanzee	CM054422.2	chr11_hap2_hsa9	119079674	119111795	spacer-138	-	32121
Chimpanzee	CM054422.2	chr11_hap2_hsa9	119773002	119805130	spacer-139	-	32128
Chimpanzee	CM054422.2	chr11_hap2_hsa9	121140190	121170735	spacer-140	-	30545
Chimpanzee	CM054422.2	chr11_hap2_hsa9	121877520	121909849	spacer-141	-	32329
Chimpanzee	CM054423.2	chr12_hap2_hsa2a	75402	106969	spacer-142	+	31567
Chimpanzee	CM054423.2	chr12_hap2_hsa2a	1174760	1206963	spacer-143	+	32203
Chimpanzee	CM054423.2	chr12_hap2_hsa2a	1582598	1614673	spacer-144	+	32075
Chimpanzee	CM054423.2	chr12_hap2_hsa2a	1673696	1705675	spacer-145	+	31979
Chimpanzee	CM054423.2	chr12_hap2_hsa2a	1762165	1794144	spacer-146	+	31979
Chimpanzee	CM054423.2	chr12_hap2_hsa2a	1850665	1881723	spacer-147	+	31058
Chimpanzee	CM054423.2	chr12_hap2_hsa2a	3660919	3693057	spacer-148	+	32138
Chimpanzee	CM054423.2	chr12_hap2_hsa2a	4194368	4216111	spacer-149	+	21743
Chimpanzee	CM054423.2	chr12_hap2_hsa2a	4807531	4839649	spacer-150	+	32118
Chimpanzee	CM054423.2	chr12_hap2_hsa2a	4911970	4936177	spacer-151	+	24207
Chimpanzee	CM054423.2	chr12_hap2_hsa2a	5011375	5043510	spacer-152	+	32135
Chimpanzee	CM054423.2	chr12_hap2_hsa2a	5306566	5338529	spacer-153	+	31963
Chimpanzee	CM054423.2	chr12_hap2_hsa2a	5660026	5692122	spacer-154	+	32096
Chimpanzee	CM054423.2	chr12_hap2_hsa2a	5953501	5985578	spacer-155	+	32077
Chimpanzee	CM054423.2	chr12_hap2_hsa2a	6034319	6066440	spacer-156	+	32121
Chimpanzee	CM054423.2	chr12_hap2_hsa2a	6270172	6302295	spacer-157	+	32123
Chimpanzee	CM054423.2	chr12_hap2_hsa2a	6327490	6357496	spacer-158	+	30006
Chimpanzee	CM054423.2	chr12_hap2_hsa2a	6608533	6640649	spacer-159	+	32116
Chimpanzee	CM054423.2	chr12_hap2_hsa2a	6794240	6826440	spacer-160	+	32200
Chimpanzee	CM054423.2	chr12_hap2_hsa2a	7157702	7189836	spacer-161	+	32134
Chimpanzee	CM054423.2	chr12_hap2_hsa2a	7293831	7325960	spacer-162	+	32129
Chimpanzee	CM054423.2	chr12_hap2_hsa2a	8392825	8424892	spacer-163	+	32067
Chimpanzee	CM054423.2	chr12_hap2_hsa2a	8708189	8740298	spacer-164	+	32109
Chimpanzee	CM054423.2	chr12_hap2_hsa2a	8852682	8884806	spacer-165	+	32124
Chimpanzee	CM054423.2	chr12_hap2_hsa2a	9109934	9141960	spacer-166	+	32026
Chimpanzee	CM054423.2	chr12_hap2_hsa2a	9361319	9393430	spacer-167	+	32111
Chimpanzee	CM054423.2	chr12_hap2_hsa2a	9487512	9519627	spacer-168	+	32115
Chimpanzee	CM054423.2	chr12_hap2_hsa2a	10157364	10189484	spacer-169	+	32120
Chimpanzee	CM054423.2	chr12_hap2_hsa2a	10739800	10772033	spacer-170	+	32233
Chimpanzee	CM054423.2	chr12_hap2_hsa2a	11028959	11058967	spacer-171	+	30008
Chimpanzee	CM054423.2	chr12_hap2_hsa2a	11813367	11845352	spacer-172	+	31985
Chimpanzee	CM054423.2	chr12_hap2_hsa2a	12001477	12033631	spacer-173	+	32154
Chimpanzee	CM054423.2	chr12_hap2_hsa2a	12096831	12128926	spacer-174	+	32095
Chimpanzee	CM054423.2	chr12_hap2_hsa2a	12314262	12345085	spacer-175	+	30823
Chimpanzee	CM054423.2	chr12_hap2_hsa2a	12747606	12779723	spacer-176	+	32117
Chimpanzee	CM054423.2	chr12_hap2_hsa2a	13701823	13732387	spacer-177	+	30564
Chimpanzee	CM054423.2	chr12_hap2_hsa2a	13900467	13932592	spacer-178	+	32125
Chimpanzee	CM054423.2	chr12_hap2_hsa2a	14104736	14134968	spacer-179	+	30232
Chimpanzee	CM054423.2	chr12_hap2_hsa2a	14298515	14330695	spacer-180	+	32180
Chimpanzee	CM054423.2	chr12_hap2_hsa2a	15056280	15087499	spacer-181	+	31219
Chimpanzee	CM054424.2	chr13_hap2_hsa2b	78777	111181	spacer-182	+	32404
Chimpanzee	CM054424.2	chr13_hap2_hsa2b	296103	328248	spacer-183	+	32145
Chimpanzee	CM054424.2	chr13_hap2_hsa2b	508506	540701	spacer-184	+	32195
Chimpanzee	CM054424.2	chr13_hap2_hsa2b	617131	649237	spacer-185	+	32106
Chimpanzee	CM054424.2	chr13_hap2_hsa2b	998352	1021884	spacer-186	+	23532
Chimpanzee	CM054424.2	chr13_hap2_hsa2b	1285559	1317695	spacer-187	+	32136
Chimpanzee	CM054424.2	chr13_hap2_hsa2b	1941346	1973479	spacer-188	+	32133
Chimpanzee	CM054424.2	chr13_hap2_hsa2b	2121629	2153750	spacer-189	+	32121
Chimpanzee	CM054424.2	chr13_hap2_hsa2b	2746147	2778262	spacer-190	+	32115
Chimpanzee	CM054424.2	chr13_hap2_hsa2b	3165781	3197882	spacer-191	+	32101
Chimpanzee	CM054424.2	chr13_hap2_hsa2b	3414180	3446315	spacer-192	+	32135
Chimpanzee	CM054424.2	chr13_hap2_hsa2b	3457412	3489511	spacer-193	+	32099
Chimpanzee	CM054424.2	chr13_hap2_hsa2b	3732888	3765027	spacer-194	+	32139
Chimpanzee	CM054424.2	chr13_hap2_hsa2b	4670923	4703036	spacer-195	+	32113
Chimpanzee	CM054424.2	chr13_hap2_hsa2b	5846024	5878155	spacer-196	+	32131
Chimpanzee	CM054424.2	chr13_hap2_hsa2b	6199503	6231619	spacer-197	+	32116
Chimpanzee	CM054424.2	chr13_hap2_hsa2b	6302201	6334395	spacer-198	+	32194
Chimpanzee	CM054424.2	chr13_hap2_hsa2b	6740155	6772276	spacer-199	+	32121
Chimpanzee	CM054424.2	chr13_hap2_hsa2b	6924494	6956633	spacer-200	+	32139
Chimpanzee	CM054424.2	chr13_hap2_hsa2b	7421760	7453848	spacer-201	+	32088
Chimpanzee	CM054424.2	chr13_hap2_hsa2b	7611929	7642347	spacer-202	+	30418
Chimpanzee	CM054424.2	chr13_hap2_hsa2b	7764410	7796467	spacer-203	+	32057
Chimpanzee	CM054424.2	chr13_hap2_hsa2b	8101087	8133233	spacer-204	+	32146
Chimpanzee	CM054424.2	chr13_hap2_hsa2b	8221485	8252432	spacer-205	+	30947
Chimpanzee	CM054424.2	chr13_hap2_hsa2b	8407200	8437604	spacer-206	+	30404
Chimpanzee	CM054424.2	chr13_hap2_hsa2b	9260066	9290482	spacer-207	+	30416
Chimpanzee	CM054424.2	chr13_hap2_hsa2b	9440333	9472758	spacer-208	+	32425
Chimpanzee	CM054424.2	chr13_hap2_hsa2b	10144197	10176613	spacer-209	+	32416
Chimpanzee	CM054424.2	chr13_hap2_hsa2b	10335461	10367446	spacer-210	+	31985
Chimpanzee	CM054424.2	chr13_hap2_hsa2b	10477741	10508660	spacer-211	+	30919
Chimpanzee	CM054424.2	chr13_hap2_hsa2b	140663994	140696381	spacer-212	-	32387
Chimpanzee	CM054425.2	chr14_hap2_hsa13	43012415	43044124	spacer-213	+	31709
Chimpanzee	CM054425.2	chr14_hap2_hsa13	43200288	43232374	spacer-214	+	32086
Chimpanzee	CM054425.2	chr14_hap2_hsa13	43291412	43323113	spacer-215	+	31701
Chimpanzee	CM054425.2	chr14_hap2_hsa13	43452152	43484301	spacer-216	+	32149
Chimpanzee	CM054425.2	chr14_hap2_hsa13	43614944	43647101	spacer-217	+	32157
Chimpanzee	CM054425.2	chr14_hap2_hsa13	43681116	43712084	spacer-218	+	30968
Chimpanzee	CM054425.2	chr14_hap2_hsa13	43900501	43932617	spacer-219	+	32116
Chimpanzee	CM054425.2	chr14_hap2_hsa13	44030720	44062673	spacer-220	+	31953
Chimpanzee	CM054425.2	chr14_hap2_hsa13	44288886	44320997	spacer-221	+	32111
Chimpanzee	CM054425.2	chr14_hap2_hsa13	44627059	44659192	spacer-222	+	32133
Chimpanzee	CM054425.2	chr14_hap2_hsa13	44830230	44861318	spacer-223	+	31088
Chimpanzee	CM054425.2	chr14_hap2_hsa13	44874397	44906508	spacer-224	+	32111
Chimpanzee	CM054425.2	chr14_hap2_hsa13	45042896	45075052	spacer-225	+	32156
Chimpanzee	CM054425.2	chr14_hap2_hsa13	45120784	45152919	spacer-226	+	32135
Chimpanzee	CM054425.2	chr14_hap2_hsa13	45346008	45367399	spacer-227	+	21391
Chimpanzee	CM054425.2	chr14_hap2_hsa13	45579992	45612099	spacer-228	+	32107
Chimpanzee	CM054425.2	chr14_hap2_hsa13	45705352	45737522	spacer-229	+	32170
Chimpanzee	CM054425.2	chr14_hap2_hsa13	45831817	45863962	spacer-230	+	32145
Chimpanzee	CM054425.2	chr14_hap2_hsa13	46036322	46067186	spacer-231	+	30864
Chimpanzee	CM054425.2	chr14_hap2_hsa13	46335544	46367720	spacer-232	+	32176
Chimpanzee	CM054425.2	chr14_hap2_hsa13	46550922	46583533	spacer-233	+	32611
Chimpanzee	CM054425.2	chr14_hap2_hsa13	46677522	46707065	spacer-234	+	29543
Chimpanzee	CM054425.2	chr14_hap2_hsa13	46994505	47025019	spacer-235	+	30514
Chimpanzee	CM054425.2	chr14_hap2_hsa13	47100566	47132691	spacer-236	+	32125
Chimpanzee	CM054425.2	chr14_hap2_hsa13	47250829	47273273	spacer-237	+	22444
Chimpanzee	CM054425.2	chr14_hap2_hsa13	47463037	47495141	spacer-238	+	32104
Chimpanzee	CM054425.2	chr14_hap2_hsa13	47771290	47797872	spacer-239	+	26582
Chimpanzee	CM054425.2	chr14_hap2_hsa13	47967625	47999743	spacer-240	+	32118
Chimpanzee	CM054425.2	chr14_hap2_hsa13	48094737	48126858	spacer-241	+	32121
Chimpanzee	CM054425.2	chr14_hap2_hsa13	48220509	48252632	spacer-242	+	32123
Chimpanzee	CM054425.2	chr14_hap2_hsa13	48344973	48377094	spacer-243	+	32121
Chimpanzee	CM054425.2	chr14_hap2_hsa13	48470553	48502674	spacer-244	+	32121
Chimpanzee	CM054425.2	chr14_hap2_hsa13	48596325	48628448	spacer-245	+	32123
Chimpanzee	CM054425.2	chr14_hap2_hsa13	49001548	49033650	spacer-246	+	32102
Chimpanzee	CM054425.2	chr14_hap2_hsa13	49266103	49298238	spacer-247	+	32135
Chimpanzee	CM054425.2	chr14_hap2_hsa13	49338226	49370182	spacer-248	+	31956
Chimpanzee	CM054425.2	chr14_hap2_hsa13	49397247	49428197	spacer-249	+	30950
Chimpanzee	CM054425.2	chr14_hap2_hsa13	49579299	49610577	spacer-250	+	31278
Chimpanzee	CM054425.2	chr14_hap2_hsa13	49715467	49745760	spacer-251	+	30293
Chimpanzee	CM054427.2	chr16_hap2_hsa15	86633	118955	spacer-252	+	32322
Chimpanzee	CM054427.2	chr16_hap2_hsa15	340685	372682	spacer-253	+	31997
Chimpanzee	CM054427.2	chr16_hap2_hsa15	601788	633783	spacer-254	+	31995
Chimpanzee	CM054427.2	chr16_hap2_hsa15	918538	950532	spacer-255	+	31994
Chimpanzee	CM054427.2	chr16_hap2_hsa15	1260914	1293021	spacer-256	+	32107
Chimpanzee	CM054427.2	chr16_hap2_hsa15	2026835	2058972	spacer-257	+	32137
Chimpanzee	CM054427.2	chr16_hap2_hsa15	2770075	2802241	spacer-258	+	32166
Chimpanzee	CM054427.2	chr16_hap2_hsa15	2965645	2997810	spacer-259	+	32165
Chimpanzee	CM054427.2	chr16_hap2_hsa15	3282749	3311011	spacer-260	+	28262
Chimpanzee	CM054427.2	chr16_hap2_hsa15	3540254	3572676	spacer-261	+	32422
Chimpanzee	CM054427.2	chr16_hap2_hsa15	5304171	5336312	spacer-262	+	32141
Chimpanzee	CM054427.2	chr16_hap2_hsa15	5412232	5444352	spacer-263	+	32120
Chimpanzee	CM054427.2	chr16_hap2_hsa15	5604230	5636373	spacer-264	+	32143
Chimpanzee	CM054427.2	chr16_hap2_hsa15	5780757	5812893	spacer-265	+	32136
Chimpanzee	CM054427.2	chr16_hap2_hsa15	6078446	6110564	spacer-266	+	32118
Chimpanzee	CM054427.2	chr16_hap2_hsa15	6291449	6323568	spacer-267	+	32119
Chimpanzee	CM054427.2	chr16_hap2_hsa15	6865625	6897765	spacer-268	+	32140
Chimpanzee	CM054427.2	chr16_hap2_hsa15	7102374	7134422	spacer-269	+	32048
Chimpanzee	CM054427.2	chr16_hap2_hsa15	7356397	7388537	spacer-270	+	32140
Chimpanzee	CM054427.2	chr16_hap2_hsa15	7593146	7625194	spacer-271	+	32048
Chimpanzee	CM054427.2	chr16_hap2_hsa15	8047392	8079517	spacer-272	+	32125
Chimpanzee	CM054427.2	chr16_hap2_hsa15	8603708	8635825	spacer-273	+	32117
Chimpanzee	CM054427.2	chr16_hap2_hsa15	9117502	9149629	spacer-274	+	32127
Chimpanzee	CM054427.2	chr16_hap2_hsa15	9310547	9342659	spacer-275	+	32112
Chimpanzee	CM054427.2	chr16_hap2_hsa15	9562032	9594089	spacer-276	+	32057
Chimpanzee	CM054427.2	chr16_hap2_hsa15	97600064	97630959	spacer-277	-	30895
Chimpanzee	CM054428.2	chr17_hap2_hsa18	91842482	91873257	spacer-278	-	30775
Chimpanzee	CM054429.2	chr18_hap2_hsa16	86437	118767	spacer-279	+	32330
Chimpanzee	CM054429.2	chr18_hap2_hsa16	487393	519288	spacer-280	+	31895
Chimpanzee	CM054429.2	chr18_hap2_hsa16	680883	712997	spacer-281	+	32114
Chimpanzee	CM054429.2	chr18_hap2_hsa16	774991	806008	spacer-282	+	31017
Chimpanzee	CM054429.2	chr18_hap2_hsa16	1155347	1185362	spacer-283	+	30015
Chimpanzee	CM054429.2	chr18_hap2_hsa16	2376697	2407938	spacer-284	+	31241
Chimpanzee	CM054429.2	chr18_hap2_hsa16	2512099	2544155	spacer-285	+	32056
Chimpanzee	CM054429.2	chr18_hap2_hsa16	5296027	5328161	spacer-286	+	32134
Chimpanzee	CM054429.2	chr18_hap2_hsa16	5899758	5931873	spacer-287	+	32115
Chimpanzee	CM054429.2	chr18_hap2_hsa16	6335325	6367506	spacer-288	+	32181
Chimpanzee	CM054429.2	chr18_hap2_hsa16	7486773	7517767	spacer-289	+	30994
Chimpanzee	CM054429.2	chr18_hap2_hsa16	94512252	94542641	spacer-290	-	30389
Chimpanzee	CM054429.2	chr18_hap2_hsa16	96849199	96880774	spacer-291	-	31575
Chimpanzee	CM054429.2	chr18_hap2_hsa16	97188408	97219274	spacer-292	-	30866
Chimpanzee	CM054429.2	chr18_hap2_hsa16	97501032	97533138	spacer-293	-	32106
Chimpanzee	CM054429.2	chr18_hap2_hsa16	98150063	98182351	spacer-294	-	32288
Chimpanzee	CM054429.2	chr18_hap2_hsa16	98356808	98388999	spacer-295	-	32191
Chimpanzee	CM054429.2	chr18_hap2_hsa16	98556754	98588955	spacer-296	-	32201
Chimpanzee	CM054429.2	chr18_hap2_hsa16	99337022	99369147	spacer-297	-	32125
Chimpanzee	CM054429.2	chr18_hap2_hsa16	100060951	100093074	spacer-298	-	32123
Chimpanzee	CM054429.2	chr18_hap2_hsa16	100738198	100769152	spacer-299	-	30954
Chimpanzee	CM054430.2	chr19_hap2_hsa17	81597	113936	spacer-300	+	32339
Chimpanzee	CM054430.2	chr19_hap2_hsa17	215226	247409	spacer-301	+	32183
Chimpanzee	CM054430.2	chr19_hap2_hsa17	667006	696180	spacer-302	+	29174
Chimpanzee	CM054430.2	chr19_hap2_hsa17	956534	988646	spacer-303	+	32112
Chimpanzee	CM054430.2	chr19_hap2_hsa17	1048977	1081122	spacer-304	+	32145
Chimpanzee	CM054430.2	chr19_hap2_hsa17	1365424	1397561	spacer-305	+	32137
Chimpanzee	CM054430.2	chr19_hap2_hsa17	1815619	1846161	spacer-306	+	30542
Chimpanzee	CM054430.2	chr19_hap2_hsa17	2005103	2037277	spacer-307	+	32174
Chimpanzee	CM054430.2	chr19_hap2_hsa17	2272461	2312697	spacer-308	+	40236
Chimpanzee	CM054430.2	chr19_hap2_hsa17	2561300	2593376	spacer-309	+	32076
Chimpanzee	CM054430.2	chr19_hap2_hsa17	3158375	3190488	spacer-310	+	32113
Chimpanzee	CM054430.2	chr19_hap2_hsa17	3744357	3776528	spacer-311	+	32171
Chimpanzee	CM054430.2	chr19_hap2_hsa17	3850379	3881625	spacer-312	+	31246
Chimpanzee	CM054430.2	chr19_hap2_hsa17	3977492	4007617	spacer-313	+	30125
Chimpanzee	CM054430.2	chr19_hap2_hsa17	4083951	4116061	spacer-314	+	32110
Chimpanzee	CM054430.2	chr19_hap2_hsa17	4399592	4431734	spacer-315	+	32142
Chimpanzee	CM054430.2	chr19_hap2_hsa17	5200394	5231014	spacer-316	+	30620
Chimpanzee	CM054430.2	chr19_hap2_hsa17	5406404	5438530	spacer-317	+	32126
Chimpanzee	CM054430.2	chr19_hap2_hsa17	5659527	5690083	spacer-318	+	30556
Chimpanzee	CM054430.2	chr19_hap2_hsa17	6254549	6279573	spacer-319	+	25024
Chimpanzee	CM054430.2	chr19_hap2_hsa17	6488992	6521109	spacer-320	+	32117
Chimpanzee	CM054430.2	chr19_hap2_hsa17	7127431	7159558	spacer-321	+	32127
Chimpanzee	CM054430.2	chr19_hap2_hsa17	7969003	8001189	spacer-322	+	32186
Chimpanzee	CM054430.2	chr19_hap2_hsa17	8127665	8159775	spacer-323	+	32110
Chimpanzee	CM054430.2	chr19_hap2_hsa17	8357246	8389375	spacer-324	+	32129
Chimpanzee	CM054430.2	chr19_hap2_hsa17	8522963	8554230	spacer-325	+	31267
Chimpanzee	CM054430.2	chr19_hap2_hsa17	8665708	8696654	spacer-326	+	30946
Chimpanzee	CM054430.2	chr19_hap2_hsa17	95225359	95256236	spacer-327	-	30877
Chimpanzee	CM054430.2	chr19_hap2_hsa17	96021659	96053715	spacer-328	-	32056
Chimpanzee	CM054430.2	chr19_hap2_hsa17	96345471	96377594	spacer-329	-	32123
Chimpanzee	CM054430.2	chr19_hap2_hsa17	96592562	96621681	spacer-330	-	29119
Chimpanzee	CM054430.2	chr19_hap2_hsa17	96642851	96675032	spacer-331	-	32181
Chimpanzee	CM054430.2	chr19_hap2_hsa17	96790989	96822543	spacer-332	-	31554
Chimpanzee	CM054430.2	chr19_hap2_hsa17	96968723	96997885	spacer-333	-	29162
Chimpanzee	CM054431.2	chr20_hap2_hsa19	81499	113827	spacer-334	+	32328
Chimpanzee	CM054431.2	chr20_hap2_hsa19	545955	576908	spacer-335	+	30953
Chimpanzee	CM054431.2	chr20_hap2_hsa19	673656	705797	spacer-336	+	32141
Chimpanzee	CM054431.2	chr20_hap2_hsa19	1137203	1169396	spacer-337	+	32193
Chimpanzee	CM054431.2	chr20_hap2_hsa19	1635826	1667966	spacer-338	+	32140
Chimpanzee	CM054431.2	chr20_hap2_hsa19	2080027	2112121	spacer-339	+	32094
Chimpanzee	CM054431.2	chr20_hap2_hsa19	2747717	2779902	spacer-340	+	32185
Chimpanzee	CM054431.2	chr20_hap2_hsa19	3144877	3177032	spacer-341	+	32155
Chimpanzee	CM054431.2	chr20_hap2_hsa19	3554295	3586389	spacer-342	+	32094
Chimpanzee	CM054431.2	chr20_hap2_hsa19	5345898	5378012	spacer-343	+	32114
Chimpanzee	CM054431.2	chr20_hap2_hsa19	5427701	5459927	spacer-344	+	32226
Chimpanzee	CM054431.2	chr20_hap2_hsa19	6743754	6772053	spacer-345	+	28299
Chimpanzee	CM054431.2	chr20_hap2_hsa19	66980512	67011443	spacer-346	-	30931
Chimpanzee	CM054431.2	chr20_hap2_hsa19	67372717	67396807	spacer-347	-	24090
Chimpanzee	CM054431.2	chr20_hap2_hsa19	67436369	67467091	spacer-348	-	30722
Chimpanzee	CM054431.2	chr20_hap2_hsa19	67525615	67557768	spacer-349	-	32153
Chimpanzee	CM054431.2	chr20_hap2_hsa19	67661033	67692021	spacer-350	-	30988
Chimpanzee	CM054431.2	chr20_hap2_hsa19	67813533	67845554	spacer-351	-	32021
Chimpanzee	CM054431.2	chr20_hap2_hsa19	68597847	68630025	spacer-352	-	32178
Chimpanzee	CM054431.2	chr20_hap2_hsa19	68744916	68776940	spacer-353	-	32024
Chimpanzee	CM054431.2	chr20_hap2_hsa19	68895830	68928037	spacer-354	-	32207
Chimpanzee	CM054431.2	chr20_hap2_hsa19	69050311	69082487	spacer-355	-	32176
Chimpanzee	CM054431.2	chr20_hap2_hsa19	69224988	69255605	spacer-356	-	30617
Chimpanzee	CM054431.2	chr20_hap2_hsa19	69389946	69420557	spacer-357	-	30611
Chimpanzee	CM054431.2	chr20_hap2_hsa19	69548695	69580848	spacer-358	-	32153
Chimpanzee	CM054431.2	chr20_hap2_hsa19	69656955	69689135	spacer-359	-	32180
Chimpanzee	CM054431.2	chr20_hap2_hsa19	70529871	70562004	spacer-360	-	32133
Chimpanzee	CM054431.2	chr20_hap2_hsa19	70758219	70789198	spacer-361	-	30979
Chimpanzee	CM054431.2	chr20_hap2_hsa19	70869230	70900771	spacer-362	-	31541
Chimpanzee	CM054431.2	chr20_hap2_hsa19	72091768	72122694	spacer-363	-	30926
Chimpanzee	CM054431.2	chr20_hap2_hsa19	72728755	72760894	spacer-364	-	32139
Chimpanzee	CM054431.2	chr20_hap2_hsa19	72923770	72955887	spacer-365	-	32117
Chimpanzee	CM054431.2	chr20_hap2_hsa19	73589556	73621652	spacer-366	-	32096
Chimpanzee	CM054431.2	chr20_hap2_hsa19	73716986	73747916	spacer-367	-	30930
Chimpanzee	CM054432.2	chr21_hap2_hsa20	76782	109309	spacer-368	+	32527
Chimpanzee	CM054432.2	chr21_hap2_hsa20	232884	265044	spacer-369	+	32160
Chimpanzee	CM054432.2	chr21_hap2_hsa20	494778	526881	spacer-370	+	32103
Chimpanzee	CM054432.2	chr21_hap2_hsa20	1843306	1873554	spacer-371	+	30248
Chimpanzee	CM054432.2	chr21_hap2_hsa20	2097487	2128036	spacer-372	+	30549
Chimpanzee	CM054432.2	chr21_hap2_hsa20	2351544	2383725	spacer-373	+	32181
Chimpanzee	CM054432.2	chr21_hap2_hsa20	3979265	4011380	spacer-374	+	32115
Chimpanzee	CM054432.2	chr21_hap2_hsa20	4039252	4071445	spacer-375	+	32193
Chimpanzee	CM054432.2	chr21_hap2_hsa20	4225622	4257801	spacer-376	+	32179
Chimpanzee	CM054432.2	chr21_hap2_hsa20	4403295	4434642	spacer-377	+	31347
Chimpanzee	CM054432.2	chr21_hap2_hsa20	4913596	4944598	spacer-378	+	31002
Chimpanzee	CM054432.2	chr21_hap2_hsa20	71117311	71148245	spacer-379	-	30934
Chimpanzee	CM054432.2	chr21_hap2_hsa20	71205386	71236255	spacer-380	-	30869
Chimpanzee	CM054432.2	chr21_hap2_hsa20	71588547	71619412	spacer-381	-	30865
Chimpanzee	CM054432.2	chr21_hap2_hsa20	72024839	72055797	spacer-382	-	30958
Chimpanzee	CM054432.2	chr21_hap2_hsa20	72775375	72806293	spacer-383	-	30918
Chimpanzee	CM054432.2	chr21_hap2_hsa20	73925506	73956390	spacer-384	-	30884
Chimpanzee	CM054432.2	chr21_hap2_hsa20	74794163	74826341	spacer-385	-	32178
Chimpanzee	CM054432.2	chr21_hap2_hsa20	75174089	75204621	spacer-386	-	30532
Chimpanzee	CM054432.2	chr21_hap2_hsa20	75276420	75308478	spacer-387	-	32058
Chimpanzee	CM054432.2	chr21_hap2_hsa20	75852445	75884578	spacer-388	-	32133
Chimpanzee	CM054432.2	chr21_hap2_hsa20	76875327	76906284	spacer-389	-	30957
Chimpanzee	CM054432.2	chr21_hap2_hsa20	78024194	78054812	spacer-390	-	30618
Chimpanzee	CM054432.2	chr21_hap2_hsa20	78396922	78429086	spacer-391	-	32164
Chimpanzee	CM054432.2	chr21_hap2_hsa20	78682244	78714663	spacer-392	-	32419
Chimpanzee	CM054433.2	chr22_hap2_hsa21	44840891	44871813	spacer-393	-	30922
Chimpanzee	CM054433.2	chr22_hap2_hsa21	46140535	46172712	spacer-394	-	32177
Chimpanzee	CM054433.2	chr22_hap2_hsa21	46924059	46956104	spacer-395	-	32045
Chimpanzee	CM054433.2	chr22_hap2_hsa21	46981849	47014039	spacer-396	-	32190
Chimpanzee	CM054433.2	chr22_hap2_hsa21	48738263	48760005	spacer-397	-	21742
Chimpanzee	CM054433.2	chr22_hap2_hsa21	48858212	48890354	spacer-398	-	32142
Chimpanzee	CM054433.2	chr22_hap2_hsa21	49248578	49280714	spacer-399	-	32136
Chimpanzee	CM054433.2	chr22_hap2_hsa21	49442847	49473817	spacer-400	-	30970
Chimpanzee	CM054438.2	chr4_hap1_hsa5	675969	706739	spacer-401	+	30770
Chimpanzee	CM054438.2	chr4_hap1_hsa5	178825989	178858380	spacer-402	-	32391
Chimpanzee	CM054439.2	chr5_hap1_hsa6	72596	103524	spacer-403	+	30928
Chimpanzee	CM054439.2	chr5_hap1_hsa6	395831	428038	spacer-404	+	32207
Chimpanzee	CM054439.2	chr5_hap1_hsa6	507760	539947	spacer-405	+	32187
Chimpanzee	CM054439.2	chr5_hap1_hsa6	712958	744890	spacer-406	+	31932
Chimpanzee	CM054439.2	chr5_hap1_hsa6	1097515	1129880	spacer-407	+	32365
Chimpanzee	CM054439.2	chr5_hap1_hsa6	1265661	1297803	spacer-408	+	32142
Chimpanzee	CM054439.2	chr5_hap1_hsa6	1663673	1695767	spacer-409	+	32094
Chimpanzee	CM054439.2	chr5_hap1_hsa6	1949272	1979788	spacer-410	+	30516
Chimpanzee	CM054439.2	chr5_hap1_hsa6	2279652	2311750	spacer-411	+	32098
Chimpanzee	CM054439.2	chr5_hap1_hsa6	2695755	2726682	spacer-412	+	30927
Chimpanzee	CM054439.2	chr5_hap1_hsa6	3567015	3597895	spacer-413	+	30880
Chimpanzee	CM054439.2	chr5_hap1_hsa6	4306910	4337799	spacer-414	+	30889
Chimpanzee	CM054439.2	chr5_hap1_hsa6	4545252	4576198	spacer-415	+	30946
Chimpanzee	CM054439.2	chr5_hap1_hsa6	4821022	4851908	spacer-416	+	30886
Chimpanzee	CM054439.2	chr5_hap1_hsa6	5045432	5074792	spacer-417	+	29360
Chimpanzee	CM054439.2	chr5_hap1_hsa6	5438008	5470238	spacer-418	+	32230
Chimpanzee	CM054439.2	chr5_hap1_hsa6	5552427	5584461	spacer-419	+	32034
Chimpanzee	CM054439.2	chr5_hap1_hsa6	5628897	5659399	spacer-420	+	30502
Chimpanzee	CM054439.2	chr5_hap1_hsa6	5736189	5767102	spacer-421	+	30913
Chimpanzee	CM054439.2	chr5_hap1_hsa6	6069525	6100267	spacer-422	+	30742
Chimpanzee	CM054439.2	chr5_hap1_hsa6	182807307	182838092	spacer-423	-	30785
Chimpanzee	CM054440.2	chr6_hap1_hsa7	91160	123501	spacer-424	+	32341
Chimpanzee	CM054440.2	chr6_hap1_hsa7	714959	747085	spacer-425	+	32126
Chimpanzee	CM054440.2	chr6_hap1_hsa7	1097121	1129284	spacer-426	+	32163
Chimpanzee	CM054440.2	chr6_hap1_hsa7	1221905	1251868	spacer-427	+	29963
Chimpanzee	CM054440.2	chr6_hap1_hsa7	1774937	1806887	spacer-428	+	31950
Chimpanzee	CM054440.2	chr6_hap1_hsa7	2065890	2097895	spacer-429	+	32005
Chimpanzee	CM054440.2	chr6_hap1_hsa7	3782793	3814940	spacer-430	+	32147
Chimpanzee	CM054440.2	chr6_hap1_hsa7	3906061	3938097	spacer-431	+	32036
Chimpanzee	CM054440.2	chr6_hap1_hsa7	4302881	4332893	spacer-432	+	30012
Chimpanzee	CM054440.2	chr6_hap1_hsa7	5645355	5676283	spacer-433	+	30928
Chimpanzee	CM054440.2	chr6_hap1_hsa7	113298760	113330908	spacer-434	+	32148
Chimpanzee	CM054440.2	chr6_hap1_hsa7	113436151	113468244	spacer-435	+	32093
Chimpanzee	CM054440.2	chr6_hap1_hsa7	113604444	113636563	spacer-436	+	32119
Chimpanzee	CM054440.2	chr6_hap1_hsa7	113823712	113855847	spacer-437	+	32135
Chimpanzee	CM054440.2	chr6_hap1_hsa7	113877281	113909372	spacer-438	+	32091
Chimpanzee	CM054440.2	chr6_hap1_hsa7	113970873	114003021	spacer-439	+	32148
Chimpanzee	CM054440.2	chr6_hap1_hsa7	114061269	114093409	spacer-440	+	32140
Chimpanzee	CM054440.2	chr6_hap1_hsa7	114233981	114266113	spacer-441	+	32132
Chimpanzee	CM054440.2	chr6_hap1_hsa7	114469843	114500379	spacer-442	+	30536
Chimpanzee	CM054440.2	chr6_hap1_hsa7	114683704	114715815	spacer-443	+	32111
Chimpanzee	CM054440.2	chr6_hap1_hsa7	114899579	114931722	spacer-444	+	32143
Chimpanzee	CM054440.2	chr6_hap1_hsa7	115330120	115362264	spacer-445	+	32144
Chimpanzee	CM054440.2	chr6_hap1_hsa7	115479730	115511892	spacer-446	+	32162
Chimpanzee	CM054440.2	chr6_hap1_hsa7	115627426	115659560	spacer-447	+	32134
Chimpanzee	CM054440.2	chr6_hap1_hsa7	115922940	115955076	spacer-448	+	32136
Chimpanzee	CM054440.2	chr6_hap1_hsa7	116078743	116110862	spacer-449	+	32119
Chimpanzee	CM054440.2	chr6_hap1_hsa7	116296469	116328645	spacer-450	+	32176
Chimpanzee	CM054440.2	chr6_hap1_hsa7	116429381	116461518	spacer-451	+	32137
Chimpanzee	CM054440.2	chr6_hap1_hsa7	116589299	116621415	spacer-452	+	32116
Chimpanzee	CM054440.2	chr6_hap1_hsa7	116770036	116802188	spacer-453	+	32152
Chimpanzee	CM054440.2	chr6_hap1_hsa7	116941897	116974069	spacer-454	+	32172
Chimpanzee	CM054440.2	chr6_hap1_hsa7	117380700	117411531	spacer-455	+	30831
Chimpanzee	CM054440.2	chr6_hap1_hsa7	117892998	117923841	spacer-456	+	30843
Chimpanzee	CM054441.2	chr7_hap1_hsa8	77859	110392	spacer-457	+	32533
Chimpanzee	CM054441.2	chr7_hap1_hsa8	370283	401519	spacer-458	+	31236
Chimpanzee	CM054441.2	chr7_hap1_hsa8	659122	689570	spacer-459	+	30448
Chimpanzee	CM054441.2	chr7_hap1_hsa8	1524507	1556540	spacer-460	+	32033
Chimpanzee	CM054441.2	chr7_hap1_hsa8	1642145	1671477	spacer-461	+	29332
Chimpanzee	CM054441.2	chr7_hap1_hsa8	1956572	1988755	spacer-462	+	32183
Chimpanzee	CM054441.2	chr7_hap1_hsa8	2660417	2692462	spacer-463	+	32045
Chimpanzee	CM054441.2	chr7_hap1_hsa8	2984132	3016341	spacer-464	+	32209
Chimpanzee	CM054441.2	chr7_hap1_hsa8	3370823	3402992	spacer-465	+	32169
Chimpanzee	CM054441.2	chr7_hap1_hsa8	3515077	3547258	spacer-466	+	32181
Chimpanzee	CM054441.2	chr7_hap1_hsa8	3722771	3754916	spacer-467	+	32145
Chimpanzee	CM054441.2	chr7_hap1_hsa8	4061100	4093318	spacer-468	+	32218
Chimpanzee	CM054441.2	chr7_hap1_hsa8	4455656	4487768	spacer-469	+	32112
Chimpanzee	CM054441.2	chr7_hap1_hsa8	4598243	4630298	spacer-470	+	32055
Chimpanzee	CM054441.2	chr7_hap1_hsa8	4727703	4759902	spacer-471	+	32199
Chimpanzee	CM054441.2	chr7_hap1_hsa8	5120497	5152658	spacer-472	+	32161
Chimpanzee	CM054441.2	chr7_hap1_hsa8	5712135	5744278	spacer-473	+	32143
Chimpanzee	CM054441.2	chr7_hap1_hsa8	5960168	5992252	spacer-474	+	32084
Chimpanzee	CM054441.2	chr7_hap1_hsa8	6885105	6910280	spacer-475	+	25175
Chimpanzee	CM054441.2	chr7_hap1_hsa8	7031728	7062648	spacer-476	+	30920
Chimpanzee	CM054441.2	chr7_hap1_hsa8	155529730	155560511	spacer-477	-	30781
Chimpanzee	CM054442.2	chr8_hap1_hsa10	80695	111665	spacer-478	+	30970
Chimpanzee	CM054442.2	chr8_hap1_hsa10	812498	844620	spacer-479	+	32122
Chimpanzee	CM054442.2	chr8_hap1_hsa10	1566572	1598699	spacer-480	+	32127
Chimpanzee	CM054442.2	chr8_hap1_hsa10	3440846	3472956	spacer-481	+	32110
Chimpanzee	CM054442.2	chr8_hap1_hsa10	4054447	4086642	spacer-482	+	32195
Chimpanzee	CM054442.2	chr8_hap1_hsa10	4402907	4435316	spacer-483	+	32409
Chimpanzee	CM054442.2	chr8_hap1_hsa10	4860984	4893104	spacer-484	+	32120
Chimpanzee	CM054442.2	chr8_hap1_hsa10	5506850	5538945	spacer-485	+	32095
Chimpanzee	CM054442.2	chr8_hap1_hsa10	5820107	5852153	spacer-486	+	32046
Chimpanzee	CM054442.2	chr8_hap1_hsa10	6451224	6483315	spacer-487	+	32091
Chimpanzee	CM054442.2	chr8_hap1_hsa10	6638356	6670484	spacer-488	+	32128
Chimpanzee	CM054442.2	chr8_hap1_hsa10	6987419	7018271	spacer-489	+	30852
Chimpanzee	CM054442.2	chr8_hap1_hsa10	7246812	7278944	spacer-490	+	32132
Chimpanzee	CM054442.2	chr8_hap1_hsa10	7840122	7872251	spacer-491	+	32129
Chimpanzee	CM054442.2	chr8_hap1_hsa10	8980182	9011431	spacer-492	+	31249
Chimpanzee	CM054442.2	chr8_hap1_hsa10	9150330	9181881	spacer-493	+	31551
Chimpanzee	CM054442.2	chr8_hap1_hsa10	9460704	9492910	spacer-494	+	32206
Chimpanzee	CM054442.2	chr8_hap1_hsa10	9543719	9575931	spacer-495	+	32212
Chimpanzee	CM054442.2	chr8_hap1_hsa10	9696880	9726794	spacer-496	+	29914
Chimpanzee	CM054442.2	chr8_hap1_hsa10	10184429	10216523	spacer-497	+	32094
Chimpanzee	CM054442.2	chr8_hap1_hsa10	10438824	10470346	spacer-498	+	31522
Chimpanzee	CM054442.2	chr8_hap1_hsa10	10705374	10737510	spacer-499	+	32136
Chimpanzee	CM054442.2	chr8_hap1_hsa10	11076632	11108750	spacer-500	+	32118
Chimpanzee	CM054442.2	chr8_hap1_hsa10	11300899	11333019	spacer-501	+	32120
Chimpanzee	CM054442.2	chr8_hap1_hsa10	11358686	11390832	spacer-502	+	32146
Chimpanzee	CM054442.2	chr8_hap1_hsa10	11560594	11592813	spacer-503	+	32219
Chimpanzee	CM054442.2	chr8_hap1_hsa10	11771184	11799445	spacer-504	+	28261
Chimpanzee	CM054442.2	chr8_hap1_hsa10	12160928	12193267	spacer-505	+	32339
Chimpanzee	CM054442.2	chr8_hap1_hsa10	12635832	12666925	spacer-506	+	31093
Chimpanzee	CM054443.2	chr9_hap1_hsa11	90494	122849	spacer-507	+	32355
Chimpanzee	CM054443.2	chr9_hap1_hsa11	252071	284245	spacer-508	+	32174
Chimpanzee	CM054443.2	chr9_hap1_hsa11	1018396	1050447	spacer-509	+	32051
Chimpanzee	CM054443.2	chr9_hap1_hsa11	1311278	1343397	spacer-510	+	32119
Chimpanzee	CM054443.2	chr9_hap1_hsa11	1829692	1861815	spacer-511	+	32123
Chimpanzee	CM054443.2	chr9_hap1_hsa11	2249969	2282171	spacer-512	+	32202
Chimpanzee	CM054443.2	chr9_hap1_hsa11	2693374	2723927	spacer-513	+	30553
Chimpanzee	CM054443.2	chr9_hap1_hsa11	2840043	2870633	spacer-514	+	30590
Chimpanzee	CM054443.2	chr9_hap1_hsa11	3375895	3408069	spacer-515	+	32174
Chimpanzee	CM054443.2	chr9_hap1_hsa11	3679029	3711226	spacer-516	+	32197
Chimpanzee	CM054443.2	chr9_hap1_hsa11	3888642	3920841	spacer-517	+	32199
Chimpanzee	CM054443.2	chr9_hap1_hsa11	4147118	4178054	spacer-518	+	30936
Chimpanzee	CM054444.2	chr10_hap1_hsa12	82534	113480	spacer-519	+	30946
Chimpanzee	CM054444.2	chr10_hap1_hsa12	862131	892747	spacer-520	+	30616
Chimpanzee	CM054444.2	chr10_hap1_hsa12	1086975	1119145	spacer-521	+	32170
Chimpanzee	CM054444.2	chr10_hap1_hsa12	1360278	1392373	spacer-522	+	32095
Chimpanzee	CM054444.2	chr10_hap1_hsa12	1977009	2007891	spacer-523	+	30882
Chimpanzee	CM054444.2	chr10_hap1_hsa12	2270923	2303089	spacer-524	+	32166
Chimpanzee	CM054444.2	chr10_hap1_hsa12	2395960	2428105	spacer-525	+	32145
Chimpanzee	CM054444.2	chr10_hap1_hsa12	2868776	2899337	spacer-526	+	30561
Chimpanzee	CM054444.2	chr10_hap1_hsa12	3592166	3624333	spacer-527	+	32167
Chimpanzee	CM054444.2	chr10_hap1_hsa12	3946314	3978383	spacer-528	+	32069
Chimpanzee	CM054444.2	chr10_hap1_hsa12	4012008	4044126	spacer-529	+	32118
Chimpanzee	CM054444.2	chr10_hap1_hsa12	4163558	4195697	spacer-530	+	32139
Chimpanzee	CM054444.2	chr10_hap1_hsa12	4831979	4864113	spacer-531	+	32134
Chimpanzee	CM054444.2	chr10_hap1_hsa12	5059733	5090264	spacer-532	+	30531
Chimpanzee	CM054444.2	chr10_hap1_hsa12	5626707	5654936	spacer-533	+	28229
Chimpanzee	CM054444.2	chr10_hap1_hsa12	6753690	6785888	spacer-534	+	32198
Chimpanzee	CM054444.2	chr10_hap1_hsa12	6835635	6866641	spacer-535	+	31006
Chimpanzee	CM054445.2	chr11_hap1_hsa9	110176	142556	spacer-536	+	32380
Chimpanzee	CM054445.2	chr11_hap1_hsa9	58856886	58887626	spacer-537	-	30740
Chimpanzee	CM054445.2	chr11_hap1_hsa9	116046141	116078252	spacer-538	-	32111
Chimpanzee	CM054445.2	chr11_hap1_hsa9	116685358	116717485	spacer-539	-	32127
Chimpanzee	CM054445.2	chr11_hap1_hsa9	117972684	118004806	spacer-540	-	32122
Chimpanzee	CM054445.2	chr11_hap1_hsa9	118749516	118781844	spacer-541	-	32328
Chimpanzee	CM054446.2	chr12_hap1_hsa2a	74904	107190	spacer-542	+	32286
Chimpanzee	CM054446.2	chr12_hap1_hsa2a	296806	329139	spacer-543	+	32333
Chimpanzee	CM054446.2	chr12_hap1_hsa2a	547352	579687	spacer-544	+	32335
Chimpanzee	CM054446.2	chr12_hap1_hsa2a	815624	845999	spacer-545	+	30375
Chimpanzee	CM054446.2	chr12_hap1_hsa2a	1547796	1578754	spacer-546	+	30958
Chimpanzee	CM054446.2	chr12_hap1_hsa2a	2210162	2242272	spacer-547	+	32110
Chimpanzee	CM054446.2	chr12_hap1_hsa2a	2425669	2457761	spacer-548	+	32092
Chimpanzee	CM054446.2	chr12_hap1_hsa2a	2674328	2706450	spacer-549	+	32122
Chimpanzee	CM054446.2	chr12_hap1_hsa2a	2877901	2910026	spacer-550	+	32125
Chimpanzee	CM054446.2	chr12_hap1_hsa2a	2966459	2997709	spacer-551	+	31250
Chimpanzee	CM054446.2	chr12_hap1_hsa2a	3613342	3645532	spacer-552	+	32190
Chimpanzee	CM054446.2	chr12_hap1_hsa2a	3869121	3901282	spacer-553	+	32161
Chimpanzee	CM054446.2	chr12_hap1_hsa2a	4142011	4174093	spacer-554	+	32082
Chimpanzee	CM054446.2	chr12_hap1_hsa2a	4504144	4536222	spacer-555	+	32078
Chimpanzee	CM054446.2	chr12_hap1_hsa2a	4578189	4608812	spacer-556	+	30623
Chimpanzee	CM054446.2	chr12_hap1_hsa2a	5715388	5747626	spacer-557	+	32238
Chimpanzee	CM054446.2	chr12_hap1_hsa2a	5999546	6031681	spacer-558	+	32135
Chimpanzee	CM054446.2	chr12_hap1_hsa2a	6313958	6346044	spacer-559	+	32086
Chimpanzee	CM054446.2	chr12_hap1_hsa2a	6678037	6707409	spacer-560	+	29372
Chimpanzee	CM054446.2	chr12_hap1_hsa2a	7004650	7033961	spacer-561	+	29311
Chimpanzee	CM054446.2	chr12_hap1_hsa2a	7372729	7396229	spacer-562	+	23500
Chimpanzee	CM054446.2	chr12_hap1_hsa2a	7540505	7572636	spacer-563	+	32131
Chimpanzee	CM054446.2	chr12_hap1_hsa2a	7634460	7664992	spacer-564	+	30532
Chimpanzee	CM054446.2	chr12_hap1_hsa2a	8612392	8644487	spacer-565	+	32095
Chimpanzee	CM054446.2	chr12_hap1_hsa2a	8755551	8785571	spacer-566	+	30020
Chimpanzee	CM054446.2	chr12_hap1_hsa2a	8960196	8992328	spacer-567	+	32132
Chimpanzee	CM054446.2	chr12_hap1_hsa2a	9106682	9138858	spacer-568	+	32176
Chimpanzee	CM054446.2	chr12_hap1_hsa2a	9460779	9492901	spacer-569	+	32122
Chimpanzee	CM054446.2	chr12_hap1_hsa2a	9616240	9647205	spacer-570	+	30965
Chimpanzee	CM054447.2	chr13_hap1_hsa2b	849413	881550	spacer-571	+	32137
Chimpanzee	CM054447.2	chr13_hap1_hsa2b	1368245	1400368	spacer-572	+	32123
Chimpanzee	CM054447.2	chr13_hap1_hsa2b	1497555	1530494	spacer-573	+	32939
Chimpanzee	CM054447.2	chr13_hap1_hsa2b	1845141	1877166	spacer-574	+	32025
Chimpanzee	CM054447.2	chr13_hap1_hsa2b	1977382	2009837	spacer-575	+	32455
Chimpanzee	CM054447.2	chr13_hap1_hsa2b	2133172	2165298	spacer-576	+	32126
Chimpanzee	CM054447.2	chr13_hap1_hsa2b	2704391	2736816	spacer-577	+	32425
Chimpanzee	CM054447.2	chr13_hap1_hsa2b	2791144	2823157	spacer-578	+	32013
Chimpanzee	CM054447.2	chr13_hap1_hsa2b	3042783	3075230	spacer-579	+	32447
Chimpanzee	CM054447.2	chr13_hap1_hsa2b	3411864	3444296	spacer-580	+	32432
Chimpanzee	CM054447.2	chr13_hap1_hsa2b	3947494	3979689	spacer-581	+	32195
Chimpanzee	CM054447.2	chr13_hap1_hsa2b	4162327	4192853	spacer-582	+	30526
Chimpanzee	CM054447.2	chr13_hap1_hsa2b	4237197	4269343	spacer-583	+	32146
Chimpanzee	CM054447.2	chr13_hap1_hsa2b	4689614	4721751	spacer-584	+	32137
Chimpanzee	CM054447.2	chr13_hap1_hsa2b	4987865	5020047	spacer-585	+	32182
Chimpanzee	CM054447.2	chr13_hap1_hsa2b	5309535	5341575	spacer-586	+	32040
Chimpanzee	CM054447.2	chr13_hap1_hsa2b	5663795	5695413	spacer-587	+	31618
Chimpanzee	CM054447.2	chr13_hap1_hsa2b	6255827	6283688	spacer-588	+	27861
Chimpanzee	CM054447.2	chr13_hap1_hsa2b	6487105	6517700	spacer-589	+	30595
Chimpanzee	CM054447.2	chr13_hap1_hsa2b	6634776	6666907	spacer-590	+	32131
Chimpanzee	CM054447.2	chr13_hap1_hsa2b	7018740	7050842	spacer-591	+	32102
Chimpanzee	CM054447.2	chr13_hap1_hsa2b	7213726	7245836	spacer-592	+	32110
Chimpanzee	CM054447.2	chr13_hap1_hsa2b	7441955	7473900	spacer-593	+	31945
Chimpanzee	CM054447.2	chr13_hap1_hsa2b	7756933	7789035	spacer-594	+	32102
Chimpanzee	CM054447.2	chr13_hap1_hsa2b	8400790	8431400	spacer-595	+	30610
Chimpanzee	CM054447.2	chr13_hap1_hsa2b	8453793	8485798	spacer-596	+	32005
Chimpanzee	CM054447.2	chr13_hap1_hsa2b	8547658	8579689	spacer-597	+	32031
Chimpanzee	CM054447.2	chr13_hap1_hsa2b	9113955	9146089	spacer-598	+	32134
Chimpanzee	CM054447.2	chr13_hap1_hsa2b	9516265	9546875	spacer-599	+	30610
Chimpanzee	CM054447.2	chr13_hap1_hsa2b	9569268	9601273	spacer-600	+	32005
Chimpanzee	CM054447.2	chr13_hap1_hsa2b	9663133	9695164	spacer-601	+	32031
Chimpanzee	CM054447.2	chr13_hap1_hsa2b	10252497	10284631	spacer-602	+	32134
Chimpanzee	CM054447.2	chr13_hap1_hsa2b	10355687	10387787	spacer-603	+	32100
Chimpanzee	CM054447.2	chr13_hap1_hsa2b	10645904	10676324	spacer-604	+	30420
Chimpanzee	CM054447.2	chr13_hap1_hsa2b	11091620	11123638	spacer-605	+	32018
Chimpanzee	CM054447.2	chr13_hap1_hsa2b	11240865	11273027	spacer-606	+	32162
Chimpanzee	CM054447.2	chr13_hap1_hsa2b	11315039	11347174	spacer-607	+	32135
Chimpanzee	CM054447.2	chr13_hap1_hsa2b	11427508	11452588	spacer-608	+	25080
Chimpanzee	CM054447.2	chr13_hap1_hsa2b	11872290	11904447	spacer-609	+	32157
Chimpanzee	CM054447.2	chr13_hap1_hsa2b	11967905	12000128	spacer-610	+	32223
Chimpanzee	CM054447.2	chr13_hap1_hsa2b	12321116	12351631	spacer-611	+	30515
Chimpanzee	CM054447.2	chr13_hap1_hsa2b	12392524	12424646	spacer-612	+	32122
Chimpanzee	CM054447.2	chr13_hap1_hsa2b	12820340	12852479	spacer-613	+	32139
Chimpanzee	CM054447.2	chr13_hap1_hsa2b	13303805	13335888	spacer-614	+	32083
Chimpanzee	CM054447.2	chr13_hap1_hsa2b	13820469	13852590	spacer-615	+	32121
Chimpanzee	CM054447.2	chr13_hap1_hsa2b	14057961	14088907	spacer-616	+	30946
Chimpanzee	CM054447.2	chr13_hap1_hsa2b	144299767	144332155	spacer-617	-	32388
Chimpanzee	CM054448.2	chr14_hap1_hsa13	45840870	45872592	spacer-618	+	31722
Chimpanzee	CM054448.2	chr14_hap1_hsa13	45997675	46029402	spacer-619	+	31727
Chimpanzee	CM054448.2	chr14_hap1_hsa13	46154485	46186211	spacer-620	+	31726
Chimpanzee	CM054448.2	chr14_hap1_hsa13	46344718	46376708	spacer-621	+	31990
Chimpanzee	CM054448.2	chr14_hap1_hsa13	46739069	46771178	spacer-622	+	32109
Chimpanzee	CM054448.2	chr14_hap1_hsa13	46970604	47002753	spacer-623	+	32149
Chimpanzee	CM054448.2	chr14_hap1_hsa13	47046266	47077240	spacer-624	+	30974
Chimpanzee	CM054448.2	chr14_hap1_hsa13	47386001	47418114	spacer-625	+	32113
Chimpanzee	CM054448.2	chr14_hap1_hsa13	47510790	47542745	spacer-626	+	31955
Chimpanzee	CM054448.2	chr14_hap1_hsa13	47730727	47762893	spacer-627	+	32166
Chimpanzee	CM054448.2	chr14_hap1_hsa13	48062096	48094246	spacer-628	+	32150
Chimpanzee	CM054448.2	chr14_hap1_hsa13	48231950	48264133	spacer-629	+	32183
Chimpanzee	CM054448.2	chr14_hap1_hsa13	48526542	48558692	spacer-630	+	32150
Chimpanzee	CM054448.2	chr14_hap1_hsa13	48692220	48724311	spacer-631	+	32091
Chimpanzee	CM054448.2	chr14_hap1_hsa13	48922316	48954520	spacer-632	+	32204
Chimpanzee	CM054448.2	chr14_hap1_hsa13	49127269	49159426	spacer-633	+	32157
Chimpanzee	CM054448.2	chr14_hap1_hsa13	49369994	49400522	spacer-634	+	30528
Chimpanzee	CM054448.2	chr14_hap1_hsa13	49506179	49538315	spacer-635	+	32136
Chimpanzee	CM054448.2	chr14_hap1_hsa13	49594989	49617427	spacer-636	+	22438
Chimpanzee	CM054448.2	chr14_hap1_hsa13	49816879	49847795	spacer-637	+	30916
Chimpanzee	CM054448.2	chr14_hap1_hsa13	50078925	50105507	spacer-638	+	26582
Chimpanzee	CM054448.2	chr14_hap1_hsa13	50278612	50300001	spacer-639	+	21389
Chimpanzee	CM054448.2	chr14_hap1_hsa13	50323112	50344430	spacer-640	+	21318
Chimpanzee	CM054448.2	chr14_hap1_hsa13	50597437	50629611	spacer-641	+	32174
Chimpanzee	CM054448.2	chr14_hap1_hsa13	50706252	50738380	spacer-642	+	32128
Chimpanzee	CM054448.2	chr14_hap1_hsa13	50781074	50812010	spacer-643	+	30936
Chimpanzee	CM054448.2	chr14_hap1_hsa13	51056822	51088983	spacer-644	+	32161
Chimpanzee	CM054448.2	chr14_hap1_hsa13	51146746	51178863	spacer-645	+	32117
Chimpanzee	CM054448.2	chr14_hap1_hsa13	51373725	51405850	spacer-646	+	32125
Chimpanzee	CM054448.2	chr14_hap1_hsa13	51536045	51566296	spacer-647	+	30251
Chimpanzee	CM054448.2	chr14_hap1_hsa13	51642095	51674035	spacer-648	+	31940
Chimpanzee	CM054448.2	chr14_hap1_hsa13	51722359	51753856	spacer-649	+	31497
Chimpanzee	CM054448.2	chr14_hap1_hsa13	51951454	51981867	spacer-650	+	30413
Chimpanzee	CM054448.2	chr14_hap1_hsa13	52003169	52034676	spacer-651	+	31507
Chimpanzee	CM054450.2	chr16_hap1_hsa15	2017774	2049896	spacer-652	+	32122
Chimpanzee	CM054450.2	chr16_hap1_hsa15	3925211	3957387	spacer-653	+	32176
Chimpanzee	CM054450.2	chr16_hap1_hsa15	4073773	4104298	spacer-654	+	30525
Chimpanzee	CM054450.2	chr16_hap1_hsa15	4172965	4205135	spacer-655	+	32170
Chimpanzee	CM054450.2	chr16_hap1_hsa15	4363568	4395786	spacer-656	+	32218
Chimpanzee	CM054450.2	chr16_hap1_hsa15	4507288	4539317	spacer-657	+	32029
Chimpanzee	CM054450.2	chr16_hap1_hsa15	4832681	4864885	spacer-658	+	32204
Chimpanzee	CM054450.2	chr16_hap1_hsa15	5025267	5055932	spacer-659	+	30665
Chimpanzee	CM054451.2	chr17_hap1_hsa18	90583390	90614165	spacer-660	-	30775
Chimpanzee	CM054452.2	chr18_hap1_hsa16	82786	115121	spacer-661	+	32335
Chimpanzee	CM054452.2	chr18_hap1_hsa16	479308	501052	spacer-662	+	21744
Chimpanzee	CM054452.2	chr18_hap1_hsa16	1181341	1212221	spacer-663	+	30880
Chimpanzee	CM054452.2	chr18_hap1_hsa16	1282745	1314896	spacer-664	+	32151
Chimpanzee	CM054452.2	chr18_hap1_hsa16	1809061	1841231	spacer-665	+	32170
Chimpanzee	CM054452.2	chr18_hap1_hsa16	2037735	2068654	spacer-666	+	30919
Chimpanzee	CM054452.2	chr18_hap1_hsa16	2255882	2287993	spacer-667	+	32111
Chimpanzee	CM054452.2	chr18_hap1_hsa16	88498240	88528625	spacer-668	-	30385
Chimpanzee	CM054452.2	chr18_hap1_hsa16	89644267	89675812	spacer-669	-	31545
Chimpanzee	CM054452.2	chr18_hap1_hsa16	90320069	90352180	spacer-670	-	32111
Chimpanzee	CM054452.2	chr18_hap1_hsa16	90435421	90467306	spacer-671	-	31885
Chimpanzee	CM054452.2	chr18_hap1_hsa16	90539307	90571424	spacer-672	-	32117
Chimpanzee	CM054452.2	chr18_hap1_hsa16	90816988	90847709	spacer-673	-	30721
Chimpanzee	CM054452.2	chr18_hap1_hsa16	92194683	92226829	spacer-674	-	32146
Chimpanzee	CM054452.2	chr18_hap1_hsa16	92960033	92990622	spacer-675	-	30589
Chimpanzee	CM054452.2	chr18_hap1_hsa16	93007027	93039210	spacer-676	-	32183
Chimpanzee	CM054452.2	chr18_hap1_hsa16	93179192	93211342	spacer-677	-	32150
Chimpanzee	CM054452.2	chr18_hap1_hsa16	93572516	93604505	spacer-678	-	31989
Chimpanzee	CM054452.2	chr18_hap1_hsa16	93775832	93807937	spacer-679	-	32105
Chimpanzee	CM054452.2	chr18_hap1_hsa16	93934730	93965122	spacer-680	-	30392
Chimpanzee	CM054452.2	chr18_hap1_hsa16	94416825	94447768	spacer-681	-	30943
Chimpanzee	CM054453.2	chr19_hap1_hsa17	89042	121370	spacer-682	+	32328
Chimpanzee	CM054453.2	chr19_hap1_hsa17	1737062	1766306	spacer-683	+	29244
Chimpanzee	CM054453.2	chr19_hap1_hsa17	1910923	1943000	spacer-684	+	32077
Chimpanzee	CM054453.2	chr19_hap1_hsa17	2902391	2934519	spacer-685	+	32128
Chimpanzee	CM054453.2	chr19_hap1_hsa17	2984077	3016207	spacer-686	+	32130
Chimpanzee	CM054453.2	chr19_hap1_hsa17	3107724	3139904	spacer-687	+	32180
Chimpanzee	CM054453.2	chr19_hap1_hsa17	3266801	3299020	spacer-688	+	32219
Chimpanzee	CM054453.2	chr19_hap1_hsa17	3366970	3399094	spacer-689	+	32124
Chimpanzee	CM054453.2	chr19_hap1_hsa17	3513674	3545843	spacer-690	+	32169
Chimpanzee	CM054453.2	chr19_hap1_hsa17	4099276	4131454	spacer-691	+	32178
Chimpanzee	CM054453.2	chr19_hap1_hsa17	4264475	4296630	spacer-692	+	32155
Chimpanzee	CM054453.2	chr19_hap1_hsa17	4693440	4725570	spacer-693	+	32130
Chimpanzee	CM054453.2	chr19_hap1_hsa17	4756972	4781194	spacer-694	+	24222
Chimpanzee	CM054453.2	chr19_hap1_hsa17	4831612	4863745	spacer-695	+	32133
Chimpanzee	CM054453.2	chr19_hap1_hsa17	4989334	5021460	spacer-696	+	32126
Chimpanzee	CM054453.2	chr19_hap1_hsa17	5512767	5534501	spacer-697	+	21734
Chimpanzee	CM054453.2	chr19_hap1_hsa17	6451248	6482800	spacer-698	+	31552
Chimpanzee	CM054453.2	chr19_hap1_hsa17	7158047	7189602	spacer-699	+	31555
Chimpanzee	CM054453.2	chr19_hap1_hsa17	7645015	7677167	spacer-700	+	32152
Chimpanzee	CM054453.2	chr19_hap1_hsa17	7734365	7766547	spacer-701	+	32182
Chimpanzee	CM054453.2	chr19_hap1_hsa17	7997441	8028372	spacer-702	+	30931
Chimpanzee	CM054453.2	chr19_hap1_hsa17	8189488	8221507	spacer-703	+	32019
Chimpanzee	CM054453.2	chr19_hap1_hsa17	8769612	8801793	spacer-704	+	32181
Chimpanzee	CM054453.2	chr19_hap1_hsa17	8931502	8963698	spacer-705	+	32196
Chimpanzee	CM054453.2	chr19_hap1_hsa17	9055966	9088197	spacer-706	+	32231
Chimpanzee	CM054453.2	chr19_hap1_hsa17	9695952	9728075	spacer-707	+	32123
Chimpanzee	CM054453.2	chr19_hap1_hsa17	9797266	9821488	spacer-708	+	24222
Chimpanzee	CM054453.2	chr19_hap1_hsa17	9935874	9965896	spacer-709	+	30022
Chimpanzee	CM054453.2	chr19_hap1_hsa17	10441962	10472907	spacer-710	+	30945
Chimpanzee	CM054453.2	chr19_hap1_hsa17	96731917	96762796	spacer-711	-	30879
Chimpanzee	CM054453.2	chr19_hap1_hsa17	97985885	98017945	spacer-712	-	32060
Chimpanzee	CM054453.2	chr19_hap1_hsa17	98340500	98372622	spacer-713	-	32122
Chimpanzee	CM054453.2	chr19_hap1_hsa17	98521653	98550769	spacer-714	-	29116
Chimpanzee	CM054453.2	chr19_hap1_hsa17	98572035	98604212	spacer-715	-	32177
Chimpanzee	CM054453.2	chr19_hap1_hsa17	98716945	98749105	spacer-716	-	32160
Chimpanzee	CM054453.2	chr19_hap1_hsa17	99495383	99524552	spacer-717	-	29169
Chimpanzee	CM054454.2	chr20_hap1_hsa19	83844	116173	spacer-718	+	32329
Chimpanzee	CM054454.2	chr20_hap1_hsa19	357838	389862	spacer-719	+	32024
Chimpanzee	CM054454.2	chr20_hap1_hsa19	925708	957836	spacer-720	+	32128
Chimpanzee	CM054454.2	chr20_hap1_hsa19	2136136	2168312	spacer-721	+	32176
Chimpanzee	CM054454.2	chr20_hap1_hsa19	2338524	2362436	spacer-722	+	23912
Chimpanzee	CM054454.2	chr20_hap1_hsa19	61601336	61632287	spacer-723	-	30951
Chimpanzee	CM054454.2	chr20_hap1_hsa19	62348606	62380802	spacer-724	-	32196
Chimpanzee	CM054454.2	chr20_hap1_hsa19	63295842	63327784	spacer-725	-	31942
Chimpanzee	CM054454.2	chr20_hap1_hsa19	63642137	63674081	spacer-726	-	31944
Chimpanzee	CM054454.2	chr20_hap1_hsa19	64104454	64136403	spacer-727	-	31949
Chimpanzee	CM054454.2	chr20_hap1_hsa19	64356622	64388742	spacer-728	-	32120
Chimpanzee	CM054454.2	chr20_hap1_hsa19	64803066	64835210	spacer-729	-	32144
Chimpanzee	CM054454.2	chr20_hap1_hsa19	65120848	65153090	spacer-730	-	32242
Chimpanzee	CM054454.2	chr20_hap1_hsa19	65258540	65289380	spacer-731	-	30840
Chimpanzee	CM054454.2	chr20_hap1_hsa19	65424860	65457083	spacer-732	-	32223
Chimpanzee	CM054454.2	chr20_hap1_hsa19	65584199	65607691	spacer-733	-	23492
Chimpanzee	CM054454.2	chr20_hap1_hsa19	66609038	66641159	spacer-734	-	32121
Chimpanzee	CM054454.2	chr20_hap1_hsa19	66715504	66745892	spacer-735	-	30388
Chimpanzee	CM054454.2	chr20_hap1_hsa19	66881279	66912224	spacer-736	-	30945
Chimpanzee	CM054454.2	chr20_hap1_hsa19	67009962	67042115	spacer-737	-	32153
Chimpanzee	CM054454.2	chr20_hap1_hsa19	67371508	67402377	spacer-738	-	30869
Chimpanzee	CM054454.2	chr20_hap1_hsa19	67963367	67993657	spacer-739	-	30290
Chimpanzee	CM054455.2	chr21_hap1_hsa20	94054	126385	spacer-740	+	32331
Chimpanzee	CM054455.2	chr21_hap1_hsa20	583476	615651	spacer-741	+	32175
Chimpanzee	CM054455.2	chr21_hap1_hsa20	2022745	2054873	spacer-742	+	32128
Chimpanzee	CM054455.2	chr21_hap1_hsa20	2158109	2188713	spacer-743	+	30604
Chimpanzee	CM054455.2	chr21_hap1_hsa20	2702015	2734506	spacer-744	+	32491
Chimpanzee	CM054455.2	chr21_hap1_hsa20	3413815	3445951	spacer-745	+	32136
Chimpanzee	CM054455.2	chr21_hap1_hsa20	3566695	3598805	spacer-746	+	32110
Chimpanzee	CM054455.2	chr21_hap1_hsa20	4639211	4671413	spacer-747	+	32202
Chimpanzee	CM054455.2	chr21_hap1_hsa20	5029159	5061332	spacer-748	+	32173
Chimpanzee	CM054455.2	chr21_hap1_hsa20	5163565	5195748	spacer-749	+	32183
Chimpanzee	CM054455.2	chr21_hap1_hsa20	5471597	5503727	spacer-750	+	32130
Chimpanzee	CM054455.2	chr21_hap1_hsa20	6203264	6234593	spacer-751	+	31329
Chimpanzee	CM054455.2	chr21_hap1_hsa20	6714831	6745856	spacer-752	+	31025
Chimpanzee	CM054455.2	chr21_hap1_hsa20	70852235	70883152	spacer-753	-	30917
Chimpanzee	CM054455.2	chr21_hap1_hsa20	71014178	71045117	spacer-754	-	30939
Chimpanzee	CM054455.2	chr21_hap1_hsa20	71176671	71207635	spacer-755	-	30964
Chimpanzee	CM054455.2	chr21_hap1_hsa20	71652963	71685084	spacer-756	-	32121
Chimpanzee	CM054455.2	chr21_hap1_hsa20	72379765	72411947	spacer-757	-	32182
Chimpanzee	CM054455.2	chr21_hap1_hsa20	72721553	72753796	spacer-758	-	32243
Chimpanzee	CM054455.2	chr21_hap1_hsa20	72816445	72848199	spacer-759	-	31754
Chimpanzee	CM054455.2	chr21_hap1_hsa20	73084407	73116528	spacer-760	-	32121
Chimpanzee	CM054455.2	chr21_hap1_hsa20	73525227	73557372	spacer-761	-	32145
Chimpanzee	CM054455.2	chr21_hap1_hsa20	73982170	74014279	spacer-762	-	32109
Chimpanzee	CM054455.2	chr21_hap1_hsa20	74239200	74271472	spacer-763	-	32272
Chimpanzee	CM054455.2	chr21_hap1_hsa20	74683505	74714070	spacer-764	-	30565
Chimpanzee	CM054455.2	chr21_hap1_hsa20	75221826	75252352	spacer-765	-	30526
Chimpanzee	CM054455.2	chr21_hap1_hsa20	75452093	75484197	spacer-766	-	32104
Chimpanzee	CM054455.2	chr21_hap1_hsa20	75561194	75589570	spacer-767	-	28376
Chimpanzee	CM054455.2	chr21_hap1_hsa20	75910811	75942966	spacer-768	-	32155
Chimpanzee	CM054455.2	chr21_hap1_hsa20	76191974	76224057	spacer-769	-	32083
Chimpanzee	CM054455.2	chr21_hap1_hsa20	76578843	76609431	spacer-770	-	30588
Chimpanzee	CM054455.2	chr21_hap1_hsa20	76662711	76694892	spacer-771	-	32181
Chimpanzee	CM054455.2	chr21_hap1_hsa20	77737584	77769620	spacer-772	-	32036
Chimpanzee	CM054455.2	chr21_hap1_hsa20	78008744	78039047	spacer-773	-	30303
Chimpanzee	CM054456.2	chr22_hap1_hsa21	47423729	47454590	spacer-774	-	30861
Chimpanzee	CM054456.2	chr22_hap1_hsa21	48356646	48388625	spacer-775	-	31979
Chimpanzee	CM054456.2	chr22_hap1_hsa21	48662782	48694906	spacer-776	-	32124
Chimpanzee	CM054456.2	chr22_hap1_hsa21	49664127	49696257	spacer-777	-	32130
Chimpanzee	CM054456.2	chr22_hap1_hsa21	50323304	50345046	spacer-778	-	21742
Chimpanzee	CM054456.2	chr22_hap1_hsa21	50465692	50487438	spacer-779	-	21746
Chimpanzee	CM054456.2	chr22_hap1_hsa21	50643130	50675632	spacer-780	-	32502
Chimpanzee	CM054456.2	chr22_hap1_hsa21	50779305	50808816	spacer-781	-	29511
Chimpanzee	CM054456.2	chr22_hap1_hsa21	51241724	51274064	spacer-782	-	32340
Chimpanzee	CM054457.2	chrX_hap1_hsaX	588327	619297	spacer-783	+	30970
Chimpanzee	CM054457.2	chrX_hap1_hsaX	153421264	153452021	spacer-784	-	30757
Chimpanzee	CM054458.2	chrY_hap2_hsaY	36047914	36078926	spacer-785	-	31012
Chimpanzee	CM068903.1	chr2_hap2_hsa3	352783	385039	spacer-786	+	32256
Chimpanzee	CM068903.1	chr2_hap2_hsa3	917732	949859	spacer-787	+	32127
Chimpanzee	CM068903.1	chr2_hap2_hsa3	2310761	2331964	spacer-788	+	21203
Chimpanzee	CM068903.1	chr2_hap2_hsa3	200136511	200167249	spacer-789	-	30738
Chimpanzee	CM068904.1	chr23_hap2_hsa22	46413070	46444307	spacer-790	-	31237
Chimpanzee	CM068904.1	chr23_hap2_hsa22	48058098	48090245	spacer-791	-	32147
Chimpanzee	CM068904.1	chr23_hap2_hsa22	48220499	48252650	spacer-792	-	32151
Chimpanzee	CM068904.1	chr23_hap2_hsa22	48366916	48399036	spacer-793	-	32120
Chimpanzee	CM068904.1	chr23_hap2_hsa22	49258222	49290468	spacer-794	-	32246
Chimpanzee	CM068904.1	chr23_hap2_hsa22	50051743	50083424	spacer-795	-	31681
Chimpanzee	CM068904.1	chr23_hap2_hsa22	50415877	50447987	spacer-796	-	32110
Chimpanzee	CM068904.1	chr23_hap2_hsa22	51462447	51494693	spacer-797	-	32246
Chimpanzee	CM068904.1	chr23_hap2_hsa22	52078001	52109682	spacer-798	-	31681
Chimpanzee	CM068904.1	chr23_hap2_hsa22	52689081	52719997	spacer-799	-	30916
Chimpanzee	CM068904.1	chr23_hap2_hsa22	52777859	52808808	spacer-800	-	30949
Chimpanzee	CM068904.1	chr23_hap2_hsa22	52850985	52882001	spacer-801	-	31016
Chimpanzee	CM068904.1	chr23_hap2_hsa22	53955698	53989142	spacer-802	-	33444
Chimpanzee	CM068904.1	chr23_hap2_hsa22	55201627	55233724	spacer-803	-	32097
Chimpanzee	CM068905.1	chr2_hap1_hsa3	84571	115511	spacer-804	+	30940
Chimpanzee	CM068905.1	chr2_hap1_hsa3	396592	428696	spacer-805	+	32104
Chimpanzee	CM068905.1	chr2_hap1_hsa3	756445	788566	spacer-806	+	32121
Chimpanzee	CM068905.1	chr2_hap1_hsa3	1517505	1549516	spacer-807	+	32011
Chimpanzee	CM068905.1	chr2_hap1_hsa3	2016490	2048695	spacer-808	+	32205
Chimpanzee	CM068905.1	chr2_hap1_hsa3	2083632	2115842	spacer-809	+	32210
Chimpanzee	CM068905.1	chr2_hap1_hsa3	2254240	2286389	spacer-810	+	32149
Chimpanzee	CM068905.1	chr2_hap1_hsa3	2838359	2870430	spacer-811	+	32071
Chimpanzee	CM068905.1	chr2_hap1_hsa3	3325622	3357680	spacer-812	+	32058
Chimpanzee	CM068905.1	chr2_hap1_hsa3	3592983	3614182	spacer-813	+	21199
Chimpanzee	CM068905.1	chr2_hap1_hsa3	201415483	201446325	spacer-814	-	30842
Chimpanzee	CM068906.1	chr23_hap1_hsa22	53128014	53159226	spacer-815	-	31212
Chimpanzee	CM068906.1	chr23_hap1_hsa22	53535815	53567962	spacer-816	-	32147
Chimpanzee	CM068906.1	chr23_hap1_hsa22	54871578	54903677	spacer-817	-	32099
Chimpanzee	CM068906.1	chr23_hap1_hsa22	55644990	55676572	spacer-818	-	31582
Chimpanzee	CM068906.1	chr23_hap1_hsa22	55960850	55992982	spacer-819	-	32132
Chimpanzee	CM068906.1	chr23_hap1_hsa22	56651497	56683597	spacer-820	-	32100
Chimpanzee	CM068906.1	chr23_hap1_hsa22	57237546	57268508	spacer-821	-	30962
Chimpanzee	CM068906.1	chr23_hap1_hsa22	57932907	57957940	spacer-822	-	25033
Chimpanzee	CM068906.1	chr23_hap1_hsa22	58123022	58153389	spacer-823	-	30367
Chimpanzee	CM068906.1	chr23_hap1_hsa22	58710409	58742586	spacer-824	-	32177
Chimpanzee	CM068906.1	chr23_hap1_hsa22	58981065	59011605	spacer-825	-	30540
Chimpanzee	CM068906.1	chr23_hap1_hsa22	59413182	59444091	spacer-826	-	30909
Bonobo	CM054464.2	chr4_pat_hsa5	124081	154646	spacer-1	+	30565
Bonobo	CM054464.2	chr4_pat_hsa5	176475542	176506170	spacer-2	-	30628
Bonobo	CM054466.2	chr6_pat_hsa7	88496	120837	spacer-3	+	32341
Bonobo	CM054466.2	chr6_pat_hsa7	356736	388436	spacer-4	+	31700
Bonobo	CM054466.2	chr6_pat_hsa7	505227	537066	spacer-5	+	31839
Bonobo	CM054466.2	chr6_pat_hsa7	745521	777561	spacer-6	+	32040
Bonobo	CM054466.2	chr6_pat_hsa7	1064655	1095226	spacer-7	+	30571
Bonobo	CM054466.2	chr6_pat_hsa7	1900688	1932776	spacer-8	+	32088
Bonobo	CM054466.2	chr6_pat_hsa7	3374620	3406817	spacer-9	+	32197
Bonobo	CM054466.2	chr6_pat_hsa7	3592014	3624060	spacer-10	+	32046
Bonobo	CM054466.2	chr6_pat_hsa7	112602311	112631804	spacer-11	+	29493
Bonobo	CM054466.2	chr6_pat_hsa7	112793440	112825566	spacer-12	+	32126
Bonobo	CM054466.2	chr6_pat_hsa7	113019079	113049672	spacer-13	+	30593
Bonobo	CM054466.2	chr6_pat_hsa7	113215501	113247588	spacer-14	+	32087
Bonobo	CM054466.2	chr6_pat_hsa7	113364171	113396322	spacer-15	+	32151
Bonobo	CM054466.2	chr6_pat_hsa7	113856113	113879988	spacer-16	+	23875
Bonobo	CM054466.2	chr6_pat_hsa7	114016808	114040675	spacer-17	+	23867
Bonobo	CM054466.2	chr6_pat_hsa7	114265659	114295916	spacer-18	+	30257
Bonobo	CM054466.2	chr6_pat_hsa7	114382429	114414522	spacer-19	+	32093
Bonobo	CM054466.2	chr6_pat_hsa7	114807011	114839148	spacer-20	+	32137
Bonobo	CM054466.2	chr6_pat_hsa7	114935717	114966304	spacer-21	+	30587
Bonobo	CM054466.2	chr6_pat_hsa7	115141035	115173125	spacer-22	+	32090
Bonobo	CM054466.2	chr6_pat_hsa7	115255684	115287842	spacer-23	+	32158
Bonobo	CM054466.2	chr6_pat_hsa7	115761150	115793309	spacer-24	+	32159
Bonobo	CM054466.2	chr6_pat_hsa7	116087542	116111422	spacer-25	+	23880
Bonobo	CM054466.2	chr6_pat_hsa7	116162496	116186375	spacer-26	+	23879
Bonobo	CM054466.2	chr6_pat_hsa7	116438354	116468935	spacer-27	+	30581
Bonobo	CM054466.2	chr6_pat_hsa7	116592849	116624941	spacer-28	+	32092
Bonobo	CM054466.2	chr6_pat_hsa7	116918494	116950633	spacer-29	+	32139
Bonobo	CM054466.2	chr6_pat_hsa7	117151884	117182489	spacer-30	+	30605
Bonobo	CM054466.2	chr6_pat_hsa7	117434487	117466570	spacer-31	+	32083
Bonobo	CM054466.2	chr6_pat_hsa7	117667881	117700038	spacer-32	+	32157
Bonobo	CM054466.2	chr6_pat_hsa7	117988034	118020178	spacer-33	+	32144
Bonobo	CM054466.2	chr6_pat_hsa7	118278182	118310266	spacer-34	+	32084
Bonobo	CM054466.2	chr6_pat_hsa7	118791941	118824097	spacer-35	+	32156
Bonobo	CM054466.2	chr6_pat_hsa7	119963204	119993798	spacer-36	+	30594
Bonobo	CM054466.2	chr6_pat_hsa7	120202877	120235030	spacer-37	+	32153
Bonobo	CM054466.2	chr6_pat_hsa7	120993744	121017617	spacer-38	+	23873
Bonobo	CM054466.2	chr6_pat_hsa7	121323269	121353867	spacer-39	+	30598
Bonobo	CM054466.2	chr6_pat_hsa7	121493923	121526076	spacer-40	+	32153
Bonobo	CM054466.2	chr6_pat_hsa7	121778792	121809380	spacer-41	+	30588
Bonobo	CM054466.2	chr6_pat_hsa7	122123563	122154152	spacer-42	+	30589
Bonobo	CM054466.2	chr6_pat_hsa7	122306642	122338798	spacer-43	+	32156
Bonobo	CM054466.2	chr6_pat_hsa7	122578157	122608748	spacer-44	+	30591
Bonobo	CM054466.2	chr6_pat_hsa7	122775576	122807661	spacer-45	+	32085
Bonobo	CM054466.2	chr6_pat_hsa7	122974199	123004778	spacer-46	+	30579
Bonobo	CM054466.2	chr6_pat_hsa7	123087906	123118485	spacer-47	+	30579
Bonobo	CM054466.2	chr6_pat_hsa7	123276710	123300576	spacer-48	+	23866
Bonobo	CM054466.2	chr6_pat_hsa7	180044745	180075320	spacer-49	-	30575
Bonobo	CM054466.2	chr6_pat_hsa7	180316198	180346654	spacer-50	-	30456
Bonobo	CM054468.2	chr8_pat_hsa10	93383	124315	spacer-51	+	30932
Bonobo	CM054468.2	chr8_pat_hsa10	275798	307905	spacer-52	+	32107
Bonobo	CM054468.2	chr8_pat_hsa10	522703	554803	spacer-53	+	32100
Bonobo	CM054468.2	chr8_pat_hsa10	743295	774262	spacer-54	+	30967
Bonobo	CM054468.2	chr8_pat_hsa10	850201	880325	spacer-55	+	30124
Bonobo	CM054468.2	chr8_pat_hsa10	1072313	1102848	spacer-56	+	30535
Bonobo	CM054468.2	chr8_pat_hsa10	1187785	1219863	spacer-57	+	32078
Bonobo	CM054468.2	chr8_pat_hsa10	1351039	1383111	spacer-58	+	32072
Bonobo	CM054468.2	chr8_pat_hsa10	1731231	1763292	spacer-59	+	32061
Bonobo	CM054468.2	chr8_pat_hsa10	1993115	2025222	spacer-60	+	32107
Bonobo	CM054468.2	chr8_pat_hsa10	2377551	2409672	spacer-61	+	32121
Bonobo	CM054468.2	chr8_pat_hsa10	3123186	3143915	spacer-62	+	20729
Bonobo	CM054468.2	chr8_pat_hsa10	3281438	3313503	spacer-63	+	32065
Bonobo	CM054468.2	chr8_pat_hsa10	3851487	3883556	spacer-64	+	32069
Bonobo	CM054468.2	chr8_pat_hsa10	4178289	4210394	spacer-65	+	32105
Bonobo	CM054468.2	chr8_pat_hsa10	4638005	4670137	spacer-66	+	32132
Bonobo	CM054468.2	chr8_pat_hsa10	5051212	5157894	spacer-67	+	106682
Bonobo	CM054468.2	chr8_pat_hsa10	5219655	5243046	spacer-68	+	23391
Bonobo	CM054468.2	chr8_pat_hsa10	7011531	7040909	spacer-69	+	29378
Bonobo	CM054468.2	chr8_pat_hsa10	7137114	7169204	spacer-70	+	32090
Bonobo	CM054468.2	chr8_pat_hsa10	7483988	7516057	spacer-71	+	32069
Bonobo	CM054468.2	chr8_pat_hsa10	8601430	8633508	spacer-72	+	32078
Bonobo	CM054468.2	chr8_pat_hsa10	8873110	8905226	spacer-73	+	32116
Bonobo	CM054468.2	chr8_pat_hsa10	8943462	8972165	spacer-74	+	28703
Bonobo	CM054468.2	chr8_pat_hsa10	9600901	9632981	spacer-75	+	32080
Bonobo	CM054468.2	chr8_pat_hsa10	9894415	9926535	spacer-76	+	32120
Bonobo	CM054468.2	chr8_pat_hsa10	9967646	9996341	spacer-77	+	28695
Bonobo	CM054468.2	chr8_pat_hsa10	10451849	10483926	spacer-78	+	32077
Bonobo	CM054468.2	chr8_pat_hsa10	10721581	10753690	spacer-79	+	32109
Bonobo	CM054468.2	chr8_pat_hsa10	10791798	10820496	spacer-80	+	28698
Bonobo	CM054468.2	chr8_pat_hsa10	11668798	11700914	spacer-81	+	32116
Bonobo	CM054468.2	chr8_pat_hsa10	12701899	12733927	spacer-82	+	32028
Bonobo	CM054468.2	chr8_pat_hsa10	14233757	14264969	spacer-83	+	31212
Bonobo	CM054468.2	chr8_pat_hsa10	149572054	149602628	spacer-84	-	30574
Bonobo	CM054468.2	chr8_pat_hsa10	150578086	150608636	spacer-85	-	30550
Bonobo	CM054470.2	chr10_pat_hsa12	96296	127226	spacer-86	+	30930
Bonobo	CM054470.2	chr10_pat_hsa12	308519	340629	spacer-87	+	32110
Bonobo	CM054470.2	chr10_pat_hsa12	1273306	1305432	spacer-88	+	32126
Bonobo	CM054470.2	chr10_pat_hsa12	1972359	2004420	spacer-89	+	32061
Bonobo	CM054470.2	chr10_pat_hsa12	3010745	3041850	spacer-90	+	31105
Bonobo	CM054470.2	chr10_pat_hsa12	3263297	3295248	spacer-91	+	31951
Bonobo	CM054470.2	chr10_pat_hsa12	4184350	4216226	spacer-92	+	31876
Bonobo	CM054470.2	chr10_pat_hsa12	4324870	4356940	spacer-93	+	32070
Bonobo	CM054470.2	chr10_pat_hsa12	4537277	4568149	spacer-94	+	30872
Bonobo	CM054470.2	chr10_pat_hsa12	139507215	139539746	spacer-95	-	32531
Bonobo	CM054471.2	chr11_pat_hsa9	95051	125627	spacer-96	+	30576
Bonobo	CM054471.2	chr11_pat_hsa9	921529	953897	spacer-97	+	32368
Bonobo	CM054471.2	chr11_pat_hsa9	68709863	68740593	spacer-98	-	30730
Bonobo	CM054471.2	chr11_pat_hsa9	125585734	125616341	spacer-99	-	30607
Bonobo	CM054472.2	chr12_pat_hsa2a	100533	132868	spacer-100	+	32335
Bonobo	CM054472.2	chr12_pat_hsa2a	625675	656311	spacer-101	+	30636
Bonobo	CM054472.2	chr12_pat_hsa2a	804416	835011	spacer-102	+	30595
Bonobo	CM054472.2	chr12_pat_hsa2a	943714	975788	spacer-103	+	32074
Bonobo	CM054472.2	chr12_pat_hsa2a	1869043	1899798	spacer-104	+	30755
Bonobo	CM054472.2	chr12_pat_hsa2a	2025353	2056820	spacer-105	+	31467
Bonobo	CM054472.2	chr12_pat_hsa2a	2317182	2345427	spacer-106	+	28245
Bonobo	CM054472.2	chr12_pat_hsa2a	2479998	2504789	spacer-107	+	24791
Bonobo	CM054472.2	chr12_pat_hsa2a	2592789	2625150	spacer-108	+	32361
Bonobo	CM054472.2	chr12_pat_hsa2a	3053316	3077443	spacer-109	+	24127
Bonobo	CM054472.2	chr12_pat_hsa2a	3609951	3641889	spacer-110	+	31938
Bonobo	CM054472.2	chr12_pat_hsa2a	3910389	3942537	spacer-111	+	32148
Bonobo	CM054472.2	chr12_pat_hsa2a	4062421	4093147	spacer-112	+	30726
Bonobo	CM054472.2	chr12_pat_hsa2a	4300014	4330553	spacer-113	+	30539
Bonobo	CM054472.2	chr12_pat_hsa2a	5018659	5050840	spacer-114	+	32181
Bonobo	CM054472.2	chr12_pat_hsa2a	5439273	5471374	spacer-115	+	32101
Bonobo	CM054472.2	chr12_pat_hsa2a	5979876	6011764	spacer-116	+	31888
Bonobo	CM054472.2	chr12_pat_hsa2a	6504431	6525162	spacer-117	+	20731
Bonobo	CM054472.2	chr12_pat_hsa2a	6599693	6631589	spacer-118	+	31896
Bonobo	CM054472.2	chr12_pat_hsa2a	6850567	6882773	spacer-119	+	32206
Bonobo	CM054472.2	chr12_pat_hsa2a	7092296	7124474	spacer-120	+	32178
Bonobo	CM054472.2	chr12_pat_hsa2a	7253292	7285469	spacer-121	+	32177
Bonobo	CM054472.2	chr12_pat_hsa2a	7461679	7492858	spacer-122	+	31179
Bonobo	CM054472.2	chr12_pat_hsa2a	7564609	7596712	spacer-123	+	32103
Bonobo	CM054472.2	chr12_pat_hsa2a	8207201	8237793	spacer-124	+	30592
Bonobo	CM054472.2	chr12_pat_hsa2a	8633135	8665231	spacer-125	+	32096
Bonobo	CM054472.2	chr12_pat_hsa2a	8868716	8897342	spacer-126	+	28626
Bonobo	CM054472.2	chr12_pat_hsa2a	9131438	9160068	spacer-127	+	28630
Bonobo	CM054472.2	chr12_pat_hsa2a	9368531	9403309	spacer-128	+	34778
Bonobo	CM054472.2	chr12_pat_hsa2a	9790314	9822354	spacer-129	+	32040
Bonobo	CM054472.2	chr12_pat_hsa2a	10113319	10145388	spacer-130	+	32069
Bonobo	CM054472.2	chr12_pat_hsa2a	10228706	10260893	spacer-131	+	32187
Bonobo	CM054472.2	chr12_pat_hsa2a	10363996	10394001	spacer-132	+	30005
Bonobo	CM054472.2	chr12_pat_hsa2a	10420261	10450262	spacer-133	+	30001
Bonobo	CM054472.2	chr12_pat_hsa2a	10555891	10587987	spacer-134	+	32096
Bonobo	CM054472.2	chr12_pat_hsa2a	10740439	10771488	spacer-135	+	31049
Bonobo	CM054472.2	chr12_pat_hsa2a	10883423	10915522	spacer-136	+	32099
Bonobo	CM054472.2	chr12_pat_hsa2a	10971870	10997382	spacer-137	+	25512
Bonobo	CM054472.2	chr12_pat_hsa2a	11145589	11177648	spacer-138	+	32059
Bonobo	CM054472.2	chr12_pat_hsa2a	11228947	11260984	spacer-139	+	32037
Bonobo	CM054472.2	chr12_pat_hsa2a	11448522	11480665	spacer-140	+	32143
Bonobo	CM054472.2	chr12_pat_hsa2a	11605809	11636022	spacer-141	+	30213
Bonobo	CM054472.2	chr12_pat_hsa2a	11733416	11765500	spacer-142	+	32084
Bonobo	CM054472.2	chr12_pat_hsa2a	11949696	11979852	spacer-143	+	30156
Bonobo	CM054472.2	chr12_pat_hsa2a	12429496	12460341	spacer-144	+	30845
Bonobo	CM054472.2	chr12_pat_hsa2a	12797474	12828678	spacer-145	+	31204
Bonobo	CM054472.2	chr12_pat_hsa2a	13024704	13055817	spacer-146	+	31113
Bonobo	CM054473.2	chr13_pat_hsa2b	86579	118991	spacer-147	+	32412
Bonobo	CM054473.2	chr13_pat_hsa2b	223828	256240	spacer-148	+	32412
Bonobo	CM054473.2	chr13_pat_hsa2b	825336	857456	spacer-149	+	32120
Bonobo	CM054473.2	chr13_pat_hsa2b	940367	971096	spacer-150	+	30729
Bonobo	CM054473.2	chr13_pat_hsa2b	1136854	1167400	spacer-151	+	30546
Bonobo	CM054473.2	chr13_pat_hsa2b	1534451	1566594	spacer-152	+	32143
Bonobo	CM054473.2	chr13_pat_hsa2b	1654091	1684794	spacer-153	+	30703
Bonobo	CM054473.2	chr13_pat_hsa2b	1863974	1894526	spacer-154	+	30552
Bonobo	CM054473.2	chr13_pat_hsa2b	2229448	2261487	spacer-155	+	32039
Bonobo	CM054473.2	chr13_pat_hsa2b	2490572	2511294	spacer-156	+	20722
Bonobo	CM054473.2	chr13_pat_hsa2b	2622507	2654705	spacer-157	+	32198
Bonobo	CM054473.2	chr13_pat_hsa2b	2894947	2927069	spacer-158	+	32122
Bonobo	CM054473.2	chr13_pat_hsa2b	3263753	3295919	spacer-159	+	32166
Bonobo	CM054473.2	chr13_pat_hsa2b	3402067	3434147	spacer-160	+	32080
Bonobo	CM054473.2	chr13_pat_hsa2b	3715634	3746165	spacer-161	+	30531
Bonobo	CM054473.2	chr13_pat_hsa2b	4191911	4222439	spacer-162	+	30528
Bonobo	CM054473.2	chr13_pat_hsa2b	4579673	4611836	spacer-163	+	32163
Bonobo	CM054473.2	chr13_pat_hsa2b	4822210	4854340	spacer-164	+	32130
Bonobo	CM054473.2	chr13_pat_hsa2b	5043960	5076036	spacer-165	+	32076
Bonobo	CM054473.2	chr13_pat_hsa2b	5150916	5181998	spacer-166	+	31082
Bonobo	CM054473.2	chr13_pat_hsa2b	5861484	5890910	spacer-167	+	29426
Bonobo	CM054473.2	chr13_pat_hsa2b	6105957	6138087	spacer-168	+	32130
Bonobo	CM054473.2	chr13_pat_hsa2b	6189553	6218279	spacer-169	+	28726
Bonobo	CM054473.2	chr13_pat_hsa2b	7258768	7288196	spacer-170	+	29428
Bonobo	CM054473.2	chr13_pat_hsa2b	7545358	7577487	spacer-171	+	32129
Bonobo	CM054473.2	chr13_pat_hsa2b	7647596	7676322	spacer-172	+	28726
Bonobo	CM054473.2	chr13_pat_hsa2b	8003811	8035915	spacer-173	+	32104
Bonobo	CM054473.2	chr13_pat_hsa2b	8112896	8145254	spacer-174	+	32358
Bonobo	CM054473.2	chr13_pat_hsa2b	8554359	8586503	spacer-175	+	32144
Bonobo	CM054473.2	chr13_pat_hsa2b	8718594	8749685	spacer-176	+	31091
Bonobo	CM054473.2	chr13_pat_hsa2b	8995368	9027508	spacer-177	+	32140
Bonobo	CM054473.2	chr13_pat_hsa2b	9157967	9189060	spacer-178	+	31093
Bonobo	CM054473.2	chr13_pat_hsa2b	9608088	9640223	spacer-179	+	32135
Bonobo	CM054473.2	chr13_pat_hsa2b	10108297	10137732	spacer-180	+	29435
Bonobo	CM054473.2	chr13_pat_hsa2b	10361132	10393253	spacer-181	+	32121
Bonobo	CM054473.2	chr13_pat_hsa2b	10441690	10470416	spacer-182	+	28726
Bonobo	CM054473.2	chr13_pat_hsa2b	11012912	11045037	spacer-183	+	32125
Bonobo	CM054473.2	chr13_pat_hsa2b	11427877	11460078	spacer-184	+	32201
Bonobo	CM054473.2	chr13_pat_hsa2b	11731690	11759178	spacer-185	+	27488
Bonobo	CM054473.2	chr13_pat_hsa2b	11825671	11857689	spacer-186	+	32018
Bonobo	CM054473.2	chr13_pat_hsa2b	12060942	12093078	spacer-187	+	32136
Bonobo	CM054473.2	chr13_pat_hsa2b	12227368	12259460	spacer-188	+	32092
Bonobo	CM054473.2	chr13_pat_hsa2b	12675451	12707393	spacer-189	+	31942
Bonobo	CM054473.2	chr13_pat_hsa2b	12747470	12778018	spacer-190	+	30548
Bonobo	CM054473.2	chr13_pat_hsa2b	13092287	13124309	spacer-191	+	32022
Bonobo	CM054473.2	chr13_pat_hsa2b	13235695	13267954	spacer-192	+	32259
Bonobo	CM054473.2	chr13_pat_hsa2b	13411465	13442010	spacer-193	+	30545
Bonobo	CM054473.2	chr13_pat_hsa2b	13550860	13583048	spacer-194	+	32188
Bonobo	CM054473.2	chr13_pat_hsa2b	13990764	14022954	spacer-195	+	32190
Bonobo	CM054473.2	chr13_pat_hsa2b	14322506	14354543	spacer-196	+	32037
Bonobo	CM054473.2	chr13_pat_hsa2b	14538996	14569562	spacer-197	+	30566
Bonobo	CM054473.2	chr13_pat_hsa2b	14675332	14705863	spacer-198	+	30531
Bonobo	CM054473.2	chr13_pat_hsa2b	14828235	14858617	spacer-199	+	30382
Bonobo	CM054473.2	chr13_pat_hsa2b	15114461	15146686	spacer-200	+	32225
Bonobo	CM054473.2	chr13_pat_hsa2b	15480350	15505804	spacer-201	+	25454
Bonobo	CM054473.2	chr13_pat_hsa2b	16034879	16066914	spacer-202	+	32035
Bonobo	CM054473.2	chr13_pat_hsa2b	16427501	16458817	spacer-203	+	31316
Bonobo	CM054473.2	chr13_pat_hsa2b	16798348	16830520	spacer-204	+	32172
Bonobo	CM054473.2	chr13_pat_hsa2b	17004253	17036315	spacer-205	+	32062
Bonobo	CM054473.2	chr13_pat_hsa2b	17723106	17748554	spacer-206	+	25448
Bonobo	CM054473.2	chr13_pat_hsa2b	17941844	17973990	spacer-207	+	32146
Bonobo	CM054473.2	chr13_pat_hsa2b	147326832	147357394	spacer-208	-	30562
Bonobo	CM054477.2	chr17_pat_hsa18	99151711	99182332	spacer-209	-	30621
Bonobo	CM054481.2	chr21_pat_hsa20	87045	117962	spacer-210	+	30917
Bonobo	CM054481.2	chr21_pat_hsa20	308165	340256	spacer-211	+	32091
Bonobo	CM054481.2	chr21_pat_hsa20	866392	886905	spacer-212	+	20513
Bonobo	CM054481.2	chr21_pat_hsa20	994536	1015048	spacer-213	+	20512
Bonobo	CM054481.2	chr21_pat_hsa20	1171011	1191492	spacer-214	+	20481
Bonobo	CM054481.2	chr21_pat_hsa20	1324685	1345166	spacer-215	+	20481
Bonobo	CM054481.2	chr21_pat_hsa20	1432849	1453334	spacer-216	+	20485
Bonobo	CM054481.2	chr21_pat_hsa20	1594914	1624943	spacer-217	+	30029
Bonobo	CM054481.2	chr21_pat_hsa20	1811755	1842787	spacer-218	+	31032
Bonobo	CM054481.2	chr21_pat_hsa20	69940859	69971780	spacer-219	-	30921
Bonobo	CM054481.2	chr21_pat_hsa20	72689851	72721894	spacer-220	-	32043
Bonobo	CM054481.2	chr21_pat_hsa20	73068514	73100573	spacer-221	-	32059
Bonobo	CM054481.2	chr21_pat_hsa20	73529853	73561930	spacer-222	-	32077
Bonobo	CM054481.2	chr21_pat_hsa20	73715150	73747263	spacer-223	-	32113
Bonobo	CM054481.2	chr21_pat_hsa20	73815720	73847833	spacer-224	-	32113
Bonobo	CM054481.2	chr21_pat_hsa20	74210737	74242789	spacer-225	-	32052
Bonobo	CM054481.2	chr21_pat_hsa20	75384500	75416598	spacer-226	-	32098
Bonobo	CM054481.2	chr21_pat_hsa20	75657196	75689299	spacer-227	-	32103
Bonobo	CM054481.2	chr21_pat_hsa20	75767554	75788254	spacer-228	-	20700
Bonobo	CM054481.2	chr21_pat_hsa20	75887900	75918444	spacer-229	-	30544
Bonobo	CM054481.2	chr21_pat_hsa20	76066909	76097015	spacer-230	-	30106
Bonobo	CM054481.2	chr21_pat_hsa20	76200812	76231766	spacer-231	-	30954
Bonobo	CM054481.2	chr21_pat_hsa20	76751770	76783980	spacer-232	-	32210
Bonobo	CM054481.2	chr21_pat_hsa20	76958026	76990266	spacer-233	-	32240
Bonobo	CM054481.2	chr21_pat_hsa20	77818169	77850369	spacer-234	-	32200
Bonobo	CM054481.2	chr21_pat_hsa20	78098352	78130698	spacer-235	-	32346
Bonobo	CM054484.2	chr1_mat_hsa1	61878	92432	spacer-236	+	30554
Bonobo	CM054484.2	chr1_mat_hsa1	226237670	226268235	spacer-237	-	30565
Bonobo	CM054487.2	chr3_mat_hsa4	124374	154757	spacer-238	+	30383
Bonobo	CM054487.2	chr3_mat_hsa4	188802268	188832847	spacer-239	-	30579
Bonobo	CM054489.2	chr5_mat_hsa6	95267	126915	spacer-240	+	31648
Bonobo	CM054489.2	chr5_mat_hsa6	261777	293872	spacer-241	+	32095
Bonobo	CM054489.2	chr5_mat_hsa6	579331	611448	spacer-242	+	32117
Bonobo	CM054489.2	chr5_mat_hsa6	802736	834880	spacer-243	+	32144
Bonobo	CM054489.2	chr5_mat_hsa6	938963	971109	spacer-244	+	32146
Bonobo	CM054489.2	chr5_mat_hsa6	1548186	1580337	spacer-245	+	32151
Bonobo	CM054489.2	chr5_mat_hsa6	1865339	1897720	spacer-246	+	32381
Bonobo	CM054489.2	chr5_mat_hsa6	2098868	2130945	spacer-247	+	32077
Bonobo	CM054489.2	chr5_mat_hsa6	2189664	2218371	spacer-248	+	28707
Bonobo	CM054489.2	chr5_mat_hsa6	2431615	2462175	spacer-249	+	30560
Bonobo	CM054489.2	chr5_mat_hsa6	2664375	2696443	spacer-250	+	32068
Bonobo	CM054489.2	chr5_mat_hsa6	2816308	2839994	spacer-251	+	23686
Bonobo	CM054489.2	chr5_mat_hsa6	3040674	3072803	spacer-252	+	32129
Bonobo	CM054489.2	chr5_mat_hsa6	3420812	3452954	spacer-253	+	32142
Bonobo	CM054489.2	chr5_mat_hsa6	3598771	3630945	spacer-254	+	32174
Bonobo	CM054489.2	chr5_mat_hsa6	3772580	3804617	spacer-255	+	32037
Bonobo	CM054489.2	chr5_mat_hsa6	4490939	4522978	spacer-256	+	32039
Bonobo	CM054489.2	chr5_mat_hsa6	4630224	4662349	spacer-257	+	32125
Bonobo	CM054489.2	chr5_mat_hsa6	4754313	4786278	spacer-258	+	31965
Bonobo	CM054489.2	chr5_mat_hsa6	4901956	4934124	spacer-259	+	32168
Bonobo	CM054489.2	chr5_mat_hsa6	6093871	6124143	spacer-260	+	30272
Bonobo	CM054489.2	chr5_mat_hsa6	6283623	6312627	spacer-261	+	29004
Bonobo	CM054489.2	chr5_mat_hsa6	6524045	6556178	spacer-262	+	32133
Bonobo	CM054489.2	chr5_mat_hsa6	6656032	6688174	spacer-263	+	32142
Bonobo	CM054489.2	chr5_mat_hsa6	6922450	6954478	spacer-264	+	32028
Bonobo	CM054489.2	chr5_mat_hsa6	7257068	7285160	spacer-265	+	28092
Bonobo	CM054489.2	chr5_mat_hsa6	8067640	8099728	spacer-266	+	32088
Bonobo	CM054489.2	chr5_mat_hsa6	8240232	8272349	spacer-267	+	32117
Bonobo	CM054489.2	chr5_mat_hsa6	8313831	8342336	spacer-268	+	28505
Bonobo	CM054489.2	chr5_mat_hsa6	8723368	8748396	spacer-269	+	25028
Bonobo	CM054489.2	chr5_mat_hsa6	9143433	9173782	spacer-270	+	30349
Bonobo	CM054489.2	chr5_mat_hsa6	9239610	9260363	spacer-271	+	20753
Bonobo	CM054489.2	chr5_mat_hsa6	9429083	9452478	spacer-272	+	23395
Bonobo	CM054489.2	chr5_mat_hsa6	9922962	9955099	spacer-273	+	32137
Bonobo	CM054489.2	chr5_mat_hsa6	10374934	10407016	spacer-274	+	32082
Bonobo	CM054489.2	chr5_mat_hsa6	10664492	10695212	spacer-275	+	30720
Bonobo	CM054489.2	chr5_mat_hsa6	188909103	188939663	spacer-276	-	30560
Bonobo	CM054491.2	chr7_mat_hsa8	829337	861450	spacer-277	+	32113
Bonobo	CM054491.2	chr7_mat_hsa8	1411894	1444045	spacer-278	+	32151
Bonobo	CM054491.2	chr7_mat_hsa8	3256978	3289090	spacer-279	+	32112
Bonobo	CM054491.2	chr7_mat_hsa8	4046047	4078185	spacer-280	+	32138
Bonobo	CM054491.2	chr7_mat_hsa8	4668617	4700757	spacer-281	+	32140
Bonobo	CM054491.2	chr7_mat_hsa8	5823385	5855427	spacer-282	+	32042
Bonobo	CM054491.2	chr7_mat_hsa8	6031778	6062316	spacer-283	+	30538
Bonobo	CM054491.2	chr7_mat_hsa8	6712671	6744756	spacer-284	+	32085
Bonobo	CM054491.2	chr7_mat_hsa8	7346796	7378859	spacer-285	+	32063
Bonobo	CM054491.2	chr7_mat_hsa8	7616602	7647155	spacer-286	+	30553
Bonobo	CM054491.2	chr7_mat_hsa8	8092380	8124550	spacer-287	+	32170
Bonobo	CM054491.2	chr7_mat_hsa8	8487864	8519929	spacer-288	+	32065
Bonobo	CM054491.2	chr7_mat_hsa8	8834437	8864999	spacer-289	+	30562
Bonobo	CM054491.2	chr7_mat_hsa8	9240386	9272445	spacer-290	+	32059
Bonobo	CM054491.2	chr7_mat_hsa8	10138183	10170235	spacer-291	+	32052
Bonobo	CM054491.2	chr7_mat_hsa8	10253245	10285302	spacer-292	+	32057
Bonobo	CM054491.2	chr7_mat_hsa8	10751810	10828140	spacer-293	+	76330
Bonobo	CM054491.2	chr7_mat_hsa8	10945858	10977900	spacer-294	+	32042
Bonobo	CM054491.2	chr7_mat_hsa8	11158751	11189196	spacer-295	+	30445
Bonobo	CM054491.2	chr7_mat_hsa8	12132980	12163867	spacer-296	+	30887
Bonobo	CM054491.2	chr7_mat_hsa8	157941947	157972501	spacer-297	-	30554
Bonobo	CM054493.2	chr9_mat_hsa11	93939	124884	spacer-298	+	30945
Bonobo	CM054493.2	chr9_mat_hsa11	853811	885989	spacer-299	+	32178
Bonobo	CM054493.2	chr9_mat_hsa11	1389771	1426327	spacer-300	+	36556
Bonobo	CM054493.2	chr9_mat_hsa11	1476742	1507744	spacer-301	+	31002
Bonobo	CM054498.2	chr14_mat_hsa13	39911567	39943340	spacer-302	+	31773
Bonobo	CM054498.2	chr14_mat_hsa13	40254791	40286893	spacer-303	+	32102
Bonobo	CM054498.2	chr14_mat_hsa13	40369202	40401305	spacer-304	+	32103
Bonobo	CM054498.2	chr14_mat_hsa13	40524297	40554791	spacer-305	+	30494
Bonobo	CM054498.2	chr14_mat_hsa13	40714021	40744937	spacer-306	+	30916
Bonobo	CM054498.2	chr14_mat_hsa13	40961198	40991421	spacer-307	+	30223
Bonobo	CM054498.2	chr14_mat_hsa13	41188965	41221069	spacer-308	+	32104
Bonobo	CM054498.2	chr14_mat_hsa13	41526965	41559064	spacer-309	+	32099
Bonobo	CM054498.2	chr14_mat_hsa13	41643021	41675117	spacer-310	+	32096
Bonobo	CM054498.2	chr14_mat_hsa13	41785804	41816294	spacer-311	+	30490
Bonobo	CM054498.2	chr14_mat_hsa13	41910836	41941752	spacer-312	+	30916
Bonobo	CM054498.2	chr14_mat_hsa13	42110239	42140449	spacer-313	+	30210
Bonobo	CM054498.2	chr14_mat_hsa13	42250021	42282105	spacer-314	+	32084
Bonobo	CM054498.2	chr14_mat_hsa13	42511663	42543767	spacer-315	+	32104
Bonobo	CM054498.2	chr14_mat_hsa13	42640958	42673053	spacer-316	+	32095
Bonobo	CM054498.2	chr14_mat_hsa13	42781579	42812076	spacer-317	+	30497
Bonobo	CM054498.2	chr14_mat_hsa13	42939579	42970505	spacer-318	+	30926
Bonobo	CM054498.2	chr14_mat_hsa13	43177847	43209620	spacer-319	+	31773
Bonobo	CM054498.2	chr14_mat_hsa13	43478434	43510534	spacer-320	+	32100
Bonobo	CM054498.2	chr14_mat_hsa13	43593053	43625151	spacer-321	+	32098
Bonobo	CM054498.2	chr14_mat_hsa13	43735934	43766423	spacer-322	+	30489
Bonobo	CM054498.2	chr14_mat_hsa13	43866559	43897475	spacer-323	+	30916
Bonobo	CM054498.2	chr14_mat_hsa13	44067084	44097307	spacer-324	+	30223
Bonobo	CM054498.2	chr14_mat_hsa13	44234761	44266858	spacer-325	+	32097
Bonobo	CM054498.2	chr14_mat_hsa13	44509927	44542027	spacer-326	+	32100
Bonobo	CM054498.2	chr14_mat_hsa13	44627320	44659415	spacer-327	+	32095
Bonobo	CM054498.2	chr14_mat_hsa13	44787590	44818089	spacer-328	+	30499
Bonobo	CM054498.2	chr14_mat_hsa13	44944805	44975733	spacer-329	+	30928
Bonobo	CM054498.2	chr14_mat_hsa13	45183014	45214788	spacer-330	+	31774
Bonobo	CM054498.2	chr14_mat_hsa13	45491145	45523251	spacer-331	+	32106
Bonobo	CM054498.2	chr14_mat_hsa13	45605560	45637660	spacer-332	+	32100
Bonobo	CM054498.2	chr14_mat_hsa13	45748791	45779279	spacer-333	+	30488
Bonobo	CM054498.2	chr14_mat_hsa13	45934994	45965910	spacer-334	+	30916
Bonobo	CM054498.2	chr14_mat_hsa13	46171306	46201526	spacer-335	+	30220
Bonobo	CM054498.2	chr14_mat_hsa13	46395543	46427648	spacer-336	+	32105
Bonobo	CM054498.2	chr14_mat_hsa13	46732614	46764722	spacer-337	+	32108
Bonobo	CM054498.2	chr14_mat_hsa13	46848679	46880752	spacer-338	+	32073
Bonobo	CM054498.2	chr14_mat_hsa13	46996523	47027013	spacer-339	+	30490
Bonobo	CM054498.2	chr14_mat_hsa13	47120117	47151025	spacer-340	+	30908
Bonobo	CM054498.2	chr14_mat_hsa13	47336421	47366643	spacer-341	+	30222
Bonobo	CM054498.2	chr14_mat_hsa13	47476215	47508298	spacer-342	+	32083
Bonobo	CM054498.2	chr14_mat_hsa13	47738611	47770714	spacer-343	+	32103
Bonobo	CM054498.2	chr14_mat_hsa13	47859360	47891455	spacer-344	+	32095
Bonobo	CM054498.2	chr14_mat_hsa13	47992747	48023249	spacer-345	+	30502
Bonobo	CM054498.2	chr14_mat_hsa13	48147271	48178200	spacer-346	+	30929
Bonobo	CM054498.2	chr14_mat_hsa13	48334206	48365964	spacer-347	+	31758
Bonobo	CM054498.2	chr14_mat_hsa13	48600747	48631120	spacer-348	+	30373
Bonobo	CM054498.2	chr14_mat_hsa13	48708965	48739507	spacer-349	+	30542
Bonobo	CM054498.2	chr14_mat_hsa13	48888933	48914855	spacer-350	+	25922
Bonobo	CM054498.2	chr14_mat_hsa13	49131802	49162750	spacer-351	+	30948
Bonobo	CM054498.2	chr14_mat_hsa13	117246231	117276904	spacer-352	-	30673
Bonobo	CM054498.2	chr14_mat_hsa13	117879863	117905072	spacer-353	-	25209
Bonobo	CM054500.2	chr16_mat_hsa15	116590	147249	spacer-354	+	30659
Bonobo	CM054500.2	chr16_mat_hsa15	1591146	1621936	spacer-355	+	30790
Bonobo	CM054500.2	chr16_mat_hsa15	1895535	1927830	spacer-356	+	32295
Bonobo	CM054500.2	chr16_mat_hsa15	2054059	2083774	spacer-357	+	29715
Bonobo	CM054500.2	chr16_mat_hsa15	2253375	2285420	spacer-358	+	32045
Bonobo	CM054500.2	chr16_mat_hsa15	2878377	2908956	spacer-359	+	30579
Bonobo	CM054500.2	chr16_mat_hsa15	3836191	3868328	spacer-360	+	32137
Bonobo	CM054500.2	chr16_mat_hsa15	3892670	3924590	spacer-361	+	31920
Bonobo	CM054500.2	chr16_mat_hsa15	4128406	4160313	spacer-362	+	31907
Bonobo	CM054500.2	chr16_mat_hsa15	4391904	4424021	spacer-363	+	32117
Bonobo	CM054500.2	chr16_mat_hsa15	4770849	4802992	spacer-364	+	32143
Bonobo	CM054500.2	chr16_mat_hsa15	4939292	4969767	spacer-365	+	30475
Bonobo	CM054500.2	chr16_mat_hsa15	5740379	5772511	spacer-366	+	32132
Bonobo	CM054500.2	chr16_mat_hsa15	6708180	6740022	spacer-367	+	31842
Bonobo	CM054500.2	chr16_mat_hsa15	6746309	6778155	spacer-368	+	31846
Bonobo	CM054500.2	chr16_mat_hsa15	6816785	6847267	spacer-369	+	30482
Bonobo	CM054500.2	chr16_mat_hsa15	7064009	7096111	spacer-370	+	32102
Bonobo	CM054500.2	chr16_mat_hsa15	7232416	7264547	spacer-371	+	32131
Bonobo	CM054500.2	chr16_mat_hsa15	7428219	7458704	spacer-372	+	30485
Bonobo	CM054500.2	chr16_mat_hsa15	8149821	8182263	spacer-373	+	32442
Bonobo	CM054500.2	chr16_mat_hsa15	95468080	95498980	spacer-374	-	30900
Bonobo	CM054502.2	chr18_mat_hsa16	91102	123241	spacer-375	+	32139
Bonobo	CM054502.2	chr18_mat_hsa16	283547	314080	spacer-376	+	30533
Bonobo	CM054502.2	chr18_mat_hsa16	1825354	1847616	spacer-377	+	22262
Bonobo	CM054502.2	chr18_mat_hsa16	2130421	2161012	spacer-378	+	30591
Bonobo	CM054502.2	chr18_mat_hsa16	2402790	2434934	spacer-379	+	32144
Bonobo	CM054502.2	chr18_mat_hsa16	2574929	2607053	spacer-380	+	32124
Bonobo	CM054502.2	chr18_mat_hsa16	3878975	3909902	spacer-381	+	30927
Bonobo	CM054502.2	chr18_mat_hsa16	106061035	106092053	spacer-382	-	31018
Bonobo	CM054502.2	chr18_mat_hsa16	106133019	106165220	spacer-383	-	32201
Bonobo	CM054502.2	chr18_mat_hsa16	106863130	106884357	spacer-384	-	21227
Bonobo	CM054502.2	chr18_mat_hsa16	107074222	107095447	spacer-385	-	21225
Bonobo	CM054502.2	chr18_mat_hsa16	107439669	107471874	spacer-386	-	32205
Bonobo	CM054502.2	chr18_mat_hsa16	107628658	107660834	spacer-387	-	32176
Bonobo	CM054502.2	chr18_mat_hsa16	108185961	108218108	spacer-388	-	32147
Bonobo	CM054502.2	chr18_mat_hsa16	108326057	108358215	spacer-389	-	32158
Bonobo	CM054502.2	chr18_mat_hsa16	108467478	108499527	spacer-390	-	32049
Bonobo	CM054502.2	chr18_mat_hsa16	108779145	108809686	spacer-391	-	30541
Bonobo	CM054502.2	chr18_mat_hsa16	109288571	109320896	spacer-392	-	32325
Bonobo	CM054503.2	chr19_mat_hsa17	57749	89860	spacer-393	+	32111
Bonobo	CM054503.2	chr19_mat_hsa17	1418628	1450714	spacer-394	+	32086
Bonobo	CM054503.2	chr19_mat_hsa17	1892901	1925023	spacer-395	+	32122
Bonobo	CM054503.2	chr19_mat_hsa17	2150116	2182238	spacer-396	+	32122
Bonobo	CM054503.2	chr19_mat_hsa17	2388645	2420767	spacer-397	+	32122
Bonobo	CM054503.2	chr19_mat_hsa17	3288887	3318282	spacer-398	+	29395
Bonobo	CM054503.2	chr19_mat_hsa17	3393299	3423826	spacer-399	+	30527
Bonobo	CM054503.2	chr19_mat_hsa17	3919655	3951736	spacer-400	+	32081
Bonobo	CM054503.2	chr19_mat_hsa17	4677532	4709143	spacer-401	+	31611
Bonobo	CM054503.2	chr19_mat_hsa17	4929388	4961512	spacer-402	+	32124
Bonobo	CM054503.2	chr19_mat_hsa17	6331271	6362875	spacer-403	+	31604
Bonobo	CM054503.2	chr19_mat_hsa17	6671293	6703408	spacer-404	+	32115
Bonobo	CM054503.2	chr19_mat_hsa17	8308405	8337852	spacer-405	+	29447
Bonobo	CM054503.2	chr19_mat_hsa17	8835645	8867735	spacer-406	+	32090
Bonobo	CM054503.2	chr19_mat_hsa17	9087225	9118273	spacer-407	+	31048
Bonobo	CM054503.2	chr19_mat_hsa17	104807632	104838588	spacer-408	-	30956
Bonobo	CM054504.2	chr20_mat_hsa19	83016	115046	spacer-409	+	32030
Bonobo	CM054504.2	chr20_mat_hsa19	1872656	1904845	spacer-410	+	32189
Bonobo	CM054504.2	chr20_mat_hsa19	2689517	2721655	spacer-411	+	32138
Bonobo	CM054504.2	chr20_mat_hsa19	3502408	3532909	spacer-412	+	30501
Bonobo	CM054504.2	chr20_mat_hsa19	3644265	3676432	spacer-413	+	32167
Bonobo	CM054504.2	chr20_mat_hsa19	66770621	66801540	spacer-414	-	30919
Bonobo	CM054504.2	chr20_mat_hsa19	66897878	66929910	spacer-415	-	32032
Bonobo	CM054504.2	chr20_mat_hsa19	69199603	69230230	spacer-416	-	30627
Bonobo	CM054504.2	chr20_mat_hsa19	69297366	69329487	spacer-417	-	32121
Bonobo	CM054504.2	chr20_mat_hsa19	69940531	69972593	spacer-418	-	32062
Bonobo	CM054504.2	chr20_mat_hsa19	70053567	70077003	spacer-419	-	23436
Bonobo	CM054504.2	chr20_mat_hsa19	70078005	70110203	spacer-420	-	32198
Bonobo	CM054504.2	chr20_mat_hsa19	70346611	70378744	spacer-421	-	32133
Bonobo	CM054504.2	chr20_mat_hsa19	70441373	70473463	spacer-422	-	32090
Bonobo	CM054506.2	chr22_mat_hsa21	40734570	40764504	spacer-423	-	29934
Bonobo	CM054506.2	chr22_mat_hsa21	41919199	41951304	spacer-424	-	32105
Bonobo	CM054506.2	chr22_mat_hsa21	42022677	42050528	spacer-425	-	27851
Bonobo	CM054506.2	chr22_mat_hsa21	42480542	42512498	spacer-426	-	31956
Bonobo	CM054506.2	chr22_mat_hsa21	43253342	43285522	spacer-427	-	32180
Bonobo	CM054506.2	chr22_mat_hsa21	43507041	43539124	spacer-428	-	32083
Bonobo	CM054506.2	chr22_mat_hsa21	43562155	43594162	spacer-429	-	32007
Bonobo	CM054506.2	chr22_mat_hsa21	44005238	44037438	spacer-430	-	32200
Bonobo	CM054506.2	chr22_mat_hsa21	44340553	44371475	spacer-431	-	30922
Bonobo	CM055472.2	chr1_pat_hsa1	227535493	227566112	spacer-432	-	30619
Bonobo	CM055475.2	chr3_pat_hsa4	154287	184664	spacer-433	+	30377
Bonobo	CM055475.2	chr3_pat_hsa4	188455871	188486445	spacer-434	-	30574
Bonobo	CM055476.2	chr4_mat_hsa5	112308	142906	spacer-435	+	30598
Bonobo	CM055476.2	chr4_mat_hsa5	176394142	176424689	spacer-436	-	30547
Bonobo	CM055477.2	chr5_pat_hsa6	86033	118170	spacer-437	+	32137
Bonobo	CM055477.2	chr5_pat_hsa6	190392	222495	spacer-438	+	32103
Bonobo	CM055477.2	chr5_pat_hsa6	657264	689331	spacer-439	+	32067
Bonobo	CM055477.2	chr5_pat_hsa6	1439137	1471284	spacer-440	+	32147
Bonobo	CM055477.2	chr5_pat_hsa6	1874591	1906664	spacer-441	+	32073
Bonobo	CM055477.2	chr5_pat_hsa6	2204868	2236943	spacer-442	+	32075
Bonobo	CM055477.2	chr5_pat_hsa6	2909704	2939719	spacer-443	+	30015
Bonobo	CM055477.2	chr5_pat_hsa6	3021311	3053455	spacer-444	+	32144
Bonobo	CM055477.2	chr5_pat_hsa6	3385362	3417276	spacer-445	+	31914
Bonobo	CM055477.2	chr5_pat_hsa6	3457831	3489745	spacer-446	+	31914
Bonobo	CM055477.2	chr5_pat_hsa6	3709836	3742030	spacer-447	+	32194
Bonobo	CM055477.2	chr5_pat_hsa6	3755804	3787998	spacer-448	+	32194
Bonobo	CM055477.2	chr5_pat_hsa6	3992106	4024206	spacer-449	+	32100
Bonobo	CM055477.2	chr5_pat_hsa6	4065626	4097736	spacer-450	+	32110
Bonobo	CM055477.2	chr5_pat_hsa6	4111947	4144067	spacer-451	+	32120
Bonobo	CM055477.2	chr5_pat_hsa6	4158278	4190393	spacer-452	+	32115
Bonobo	CM055477.2	chr5_pat_hsa6	4204572	4236688	spacer-453	+	32116
Bonobo	CM055477.2	chr5_pat_hsa6	4250867	4282976	spacer-454	+	32109
Bonobo	CM055477.2	chr5_pat_hsa6	4297155	4329263	spacer-455	+	32108
Bonobo	CM055477.2	chr5_pat_hsa6	4531031	4563171	spacer-456	+	32140
Bonobo	CM055477.2	chr5_pat_hsa6	5030005	5062186	spacer-457	+	32181
Bonobo	CM055477.2	chr5_pat_hsa6	5352069	5384389	spacer-458	+	32320
Bonobo	CM055477.2	chr5_pat_hsa6	5551599	5583764	spacer-459	+	32165
Bonobo	CM055477.2	chr5_pat_hsa6	5745951	5778069	spacer-460	+	32118
Bonobo	CM055477.2	chr5_pat_hsa6	6496049	6526719	spacer-461	+	30670
Bonobo	CM055477.2	chr5_pat_hsa6	6681651	6712264	spacer-462	+	30613
Bonobo	CM055477.2	chr5_pat_hsa6	6897938	6926269	spacer-463	+	28331
Bonobo	CM055477.2	chr5_pat_hsa6	7037967	7070328	spacer-464	+	32361
Bonobo	CM055477.2	chr5_pat_hsa6	7217839	7249943	spacer-465	+	32104
Bonobo	CM055477.2	chr5_pat_hsa6	7383040	7415357	spacer-466	+	32317
Bonobo	CM055477.2	chr5_pat_hsa6	7586272	7611332	spacer-467	+	25060
Bonobo	CM055477.2	chr5_pat_hsa6	8039248	8069840	spacer-468	+	30592
Bonobo	CM055477.2	chr5_pat_hsa6	8275794	8304048	spacer-469	+	28254
Bonobo	CM055477.2	chr5_pat_hsa6	8407847	8440207	spacer-470	+	32360
Bonobo	CM055477.2	chr5_pat_hsa6	8615132	8647236	spacer-471	+	32104
Bonobo	CM055477.2	chr5_pat_hsa6	8993731	9025632	spacer-472	+	31901
Bonobo	CM055477.2	chr5_pat_hsa6	9249596	9278981	spacer-473	+	29385
Bonobo	CM055477.2	chr5_pat_hsa6	9420481	9452550	spacer-474	+	32069
Bonobo	CM055477.2	chr5_pat_hsa6	9498862	9530994	spacer-475	+	32132
Bonobo	CM055477.2	chr5_pat_hsa6	9687604	9719733	spacer-476	+	32129
Bonobo	CM055477.2	chr5_pat_hsa6	10151166	10183265	spacer-477	+	32099
Bonobo	CM055477.2	chr5_pat_hsa6	10462729	10491869	spacer-478	+	29140
Bonobo	CM055477.2	chr5_pat_hsa6	11125801	11156460	spacer-479	+	30659
Bonobo	CM055477.2	chr5_pat_hsa6	11253412	11284019	spacer-480	+	30607
Bonobo	CM055477.2	chr5_pat_hsa6	11374082	11402300	spacer-481	+	28218
Bonobo	CM055477.2	chr5_pat_hsa6	11518247	11550611	spacer-482	+	32364
Bonobo	CM055477.2	chr5_pat_hsa6	11673313	11702469	spacer-483	+	29156
Bonobo	CM055477.2	chr5_pat_hsa6	12050063	12072632	spacer-484	+	22569
Bonobo	CM055477.2	chr5_pat_hsa6	12778968	12811174	spacer-485	+	32206
Bonobo	CM055477.2	chr5_pat_hsa6	13022592	13054700	spacer-486	+	32108
Bonobo	CM055477.2	chr5_pat_hsa6	13198332	13230505	spacer-487	+	32173
Bonobo	CM055477.2	chr5_pat_hsa6	13637725	13668245	spacer-488	+	30520
Bonobo	CM055477.2	chr5_pat_hsa6	13795932	13828061	spacer-489	+	32129
Bonobo	CM055477.2	chr5_pat_hsa6	13862769	13891271	spacer-490	+	28502
Bonobo	CM055477.2	chr5_pat_hsa6	14201962	14227000	spacer-491	+	25038
Bonobo	CM055477.2	chr5_pat_hsa6	14482115	14514204	spacer-492	+	32089
Bonobo	CM055477.2	chr5_pat_hsa6	14691839	14722557	spacer-493	+	30718
Bonobo	CM055477.2	chr5_pat_hsa6	190997130	191027696	spacer-494	-	30566
Bonobo	CM055478.2	chr6_mat_hsa7	87962	120293	spacer-495	+	32331
Bonobo	CM055478.2	chr6_mat_hsa7	366532	398213	spacer-496	+	31681
Bonobo	CM055478.2	chr6_mat_hsa7	539839	571671	spacer-497	+	31832
Bonobo	CM055478.2	chr6_mat_hsa7	820828	852868	spacer-498	+	32040
Bonobo	CM055478.2	chr6_mat_hsa7	1099427	1130004	spacer-499	+	30577
Bonobo	CM055478.2	chr6_mat_hsa7	2037507	2069597	spacer-500	+	32090
Bonobo	CM055478.2	chr6_mat_hsa7	3628242	3660429	spacer-501	+	32187
Bonobo	CM055478.2	chr6_mat_hsa7	4498570	4530760	spacer-502	+	32190
Bonobo	CM055478.2	chr6_mat_hsa7	4700188	4732236	spacer-503	+	32048
Bonobo	CM055478.2	chr6_mat_hsa7	120911341	120940831	spacer-504	+	29490
Bonobo	CM055478.2	chr6_mat_hsa7	121101822	121133951	spacer-505	+	32129
Bonobo	CM055478.2	chr6_mat_hsa7	121300834	121331419	spacer-506	+	30585
Bonobo	CM055478.2	chr6_mat_hsa7	121437156	121469248	spacer-507	+	32092
Bonobo	CM055478.2	chr6_mat_hsa7	121608674	121640828	spacer-508	+	32154
Bonobo	CM055478.2	chr6_mat_hsa7	122218760	122249348	spacer-509	+	30588
Bonobo	CM055478.2	chr6_mat_hsa7	122350329	122382415	spacer-510	+	32086
Bonobo	CM055478.2	chr6_mat_hsa7	122469731	122501882	spacer-511	+	32151
Bonobo	CM055478.2	chr6_mat_hsa7	122869085	122892960	spacer-512	+	23875
Bonobo	CM055478.2	chr6_mat_hsa7	123009569	123033437	spacer-513	+	23868
Bonobo	CM055478.2	chr6_mat_hsa7	123374110	123404696	spacer-514	+	30586
Bonobo	CM055478.2	chr6_mat_hsa7	123460426	123492512	spacer-515	+	32086
Bonobo	CM055478.2	chr6_mat_hsa7	123718288	123750415	spacer-516	+	32127
Bonobo	CM055478.2	chr6_mat_hsa7	123894537	123925122	spacer-517	+	30585
Bonobo	CM055478.2	chr6_mat_hsa7	124025076	124057168	spacer-518	+	32092
Bonobo	CM055478.2	chr6_mat_hsa7	124202446	124234603	spacer-519	+	32157
Bonobo	CM055478.2	chr6_mat_hsa7	124621823	124645697	spacer-520	+	23874
Bonobo	CM055478.2	chr6_mat_hsa7	124944257	124974848	spacer-521	+	30591
Bonobo	CM055478.2	chr6_mat_hsa7	125081072	125113156	spacer-522	+	32084
Bonobo	CM055478.2	chr6_mat_hsa7	125195894	125228046	spacer-523	+	32152
Bonobo	CM055478.2	chr6_mat_hsa7	125566959	125590837	spacer-524	+	23878
Bonobo	CM055478.2	chr6_mat_hsa7	125719425	125743292	spacer-525	+	23867
Bonobo	CM055478.2	chr6_mat_hsa7	125755857	125779724	spacer-526	+	23867
Bonobo	CM055478.2	chr6_mat_hsa7	126126290	126156878	spacer-527	+	30588
Bonobo	CM055478.2	chr6_mat_hsa7	126297248	126329334	spacer-528	+	32086
Bonobo	CM055478.2	chr6_mat_hsa7	126612358	126641843	spacer-529	+	29485
Bonobo	CM055478.2	chr6_mat_hsa7	126764695	126796817	spacer-530	+	32122
Bonobo	CM055478.2	chr6_mat_hsa7	126905584	126936177	spacer-531	+	30593
Bonobo	CM055478.2	chr6_mat_hsa7	127061770	127093368	spacer-532	+	31598
Bonobo	CM055478.2	chr6_mat_hsa7	127206441	127238574	spacer-533	+	32133
Bonobo	CM055478.2	chr6_mat_hsa7	127416283	127448378	spacer-534	+	32095
Bonobo	CM055478.2	chr6_mat_hsa7	127588216	127620366	spacer-535	+	32150
Bonobo	CM055478.2	chr6_mat_hsa7	127867021	127890899	spacer-536	+	23878
Bonobo	CM055478.2	chr6_mat_hsa7	128128256	128158854	spacer-537	+	30598
Bonobo	CM055478.2	chr6_mat_hsa7	128369776	128401930	spacer-538	+	32154
Bonobo	CM055478.2	chr6_mat_hsa7	128652417	128682825	spacer-539	+	30408
Bonobo	CM055478.2	chr6_mat_hsa7	128854555	128886711	spacer-540	+	32156
Bonobo	CM055478.2	chr6_mat_hsa7	129048553	129077964	spacer-541	+	29411
Bonobo	CM055478.2	chr6_mat_hsa7	129238559	129262433	spacer-542	+	23874
Bonobo	CM055478.2	chr6_mat_hsa7	129416038	129446626	spacer-543	+	30588
Bonobo	CM055478.2	chr6_mat_hsa7	129606955	129639104	spacer-544	+	32149
Bonobo	CM055478.2	chr6_mat_hsa7	129950103	129973980	spacer-545	+	23877
Bonobo	CM055478.2	chr6_mat_hsa7	129978904	130002780	spacer-546	+	23876
Bonobo	CM055478.2	chr6_mat_hsa7	130113979	130137856	spacer-547	+	23877
Bonobo	CM055478.2	chr6_mat_hsa7	130243742	130267619	spacer-548	+	23877
Bonobo	CM055478.2	chr6_mat_hsa7	130272543	130296421	spacer-549	+	23878
Bonobo	CM055478.2	chr6_mat_hsa7	130723516	130755660	spacer-550	+	32144
Bonobo	CM055478.2	chr6_mat_hsa7	131025395	131057522	spacer-551	+	32127
Bonobo	CM055478.2	chr6_mat_hsa7	131449001	131479584	spacer-552	+	30583
Bonobo	CM055478.2	chr6_mat_hsa7	131640236	131672321	spacer-553	+	32085
Bonobo	CM055478.2	chr6_mat_hsa7	132002617	132034764	spacer-554	+	32147
Bonobo	CM055478.2	chr6_mat_hsa7	132284439	132315019	spacer-555	+	30580
Bonobo	CM055478.2	chr6_mat_hsa7	132455888	132487980	spacer-556	+	32092
Bonobo	CM055478.2	chr6_mat_hsa7	132730858	132763011	spacer-557	+	32153
Bonobo	CM055478.2	chr6_mat_hsa7	133072154	133096027	spacer-558	+	23873
Bonobo	CM055478.2	chr6_mat_hsa7	133545881	133576473	spacer-559	+	30592
Bonobo	CM055478.2	chr6_mat_hsa7	133775340	133807273	spacer-560	+	31933
Bonobo	CM055478.2	chr6_mat_hsa7	133943867	133976003	spacer-561	+	32136
Bonobo	CM055478.2	chr6_mat_hsa7	134261960	134292550	spacer-562	+	30590
Bonobo	CM055478.2	chr6_mat_hsa7	134492395	134524551	spacer-563	+	32156
Bonobo	CM055478.2	chr6_mat_hsa7	134897089	134920963	spacer-564	+	23874
Bonobo	CM055478.2	chr6_mat_hsa7	135291228	135323368	spacer-565	+	32140
Bonobo	CM055478.2	chr6_mat_hsa7	135723858	135747735	spacer-566	+	23877
Bonobo	CM055478.2	chr6_mat_hsa7	136140512	136172447	spacer-567	+	31935
Bonobo	CM055478.2	chr6_mat_hsa7	136310908	136343045	spacer-568	+	32137
Bonobo	CM055478.2	chr6_mat_hsa7	136739770	136763645	spacer-569	+	23875
Bonobo	CM055478.2	chr6_mat_hsa7	137148731	137180873	spacer-570	+	32142
Bonobo	CM055478.2	chr6_mat_hsa7	137551502	137575378	spacer-571	+	23876
Bonobo	CM055478.2	chr6_mat_hsa7	137948721	137980812	spacer-572	+	32091
Bonobo	CM055478.2	chr6_mat_hsa7	138135981	138159860	spacer-573	+	23879
Bonobo	CM055478.2	chr6_mat_hsa7	138562356	138592979	spacer-574	+	30623
Bonobo	CM055478.2	chr6_mat_hsa7	138788959	138821047	spacer-575	+	32088
Bonobo	CM055478.2	chr6_mat_hsa7	139104532	139128412	spacer-576	+	23880
Bonobo	CM055478.2	chr6_mat_hsa7	195962016	195992600	spacer-577	-	30584
Bonobo	CM055479.2	chr7_pat_hsa8	1403438	1435590	spacer-578	+	32152
Bonobo	CM055479.2	chr7_pat_hsa8	1776193	1808334	spacer-579	+	32141
Bonobo	CM055479.2	chr7_pat_hsa8	3434384	3466497	spacer-580	+	32113
Bonobo	CM055479.2	chr7_pat_hsa8	4121408	4153521	spacer-581	+	32113
Bonobo	CM055479.2	chr7_pat_hsa8	4981415	5013553	spacer-582	+	32138
Bonobo	CM055479.2	chr7_pat_hsa8	5848878	5881021	spacer-583	+	32143
Bonobo	CM055479.2	chr7_pat_hsa8	7003527	7035697	spacer-584	+	32170
Bonobo	CM055479.2	chr7_pat_hsa8	8098397	8130438	spacer-585	+	32041
Bonobo	CM055479.2	chr7_pat_hsa8	8310677	8341220	spacer-586	+	30543
Bonobo	CM055479.2	chr7_pat_hsa8	9030034	9062118	spacer-587	+	32084
Bonobo	CM055479.2	chr7_pat_hsa8	9352655	9384739	spacer-588	+	32084
Bonobo	CM055479.2	chr7_pat_hsa8	10004683	10036746	spacer-589	+	32063
Bonobo	CM055479.2	chr7_pat_hsa8	10336365	10366916	spacer-590	+	30551
Bonobo	CM055479.2	chr7_pat_hsa8	10801405	10833567	spacer-591	+	32162
Bonobo	CM055479.2	chr7_pat_hsa8	11265364	11297427	spacer-592	+	32063
Bonobo	CM055479.2	chr7_pat_hsa8	11668825	11699385	spacer-593	+	30560
Bonobo	CM055479.2	chr7_pat_hsa8	12156837	12188896	spacer-594	+	32059
Bonobo	CM055479.2	chr7_pat_hsa8	13070702	13102750	spacer-595	+	32048
Bonobo	CM055479.2	chr7_pat_hsa8	13165079	13197136	spacer-596	+	32057
Bonobo	CM055479.2	chr7_pat_hsa8	13524094	13600552	spacer-597	+	76458
Bonobo	CM055479.2	chr7_pat_hsa8	13734895	13766937	spacer-598	+	32042
Bonobo	CM055479.2	chr7_pat_hsa8	13968372	13998817	spacer-599	+	30445
Bonobo	CM055479.2	chr7_pat_hsa8	14836272	14867159	spacer-600	+	30887
Bonobo	CM055479.2	chr7_pat_hsa8	162642703	162673273	spacer-601	-	30570
Bonobo	CM055480.2	chr8_mat_hsa10	53111	85212	spacer-602	+	32101
Bonobo	CM055480.2	chr8_mat_hsa10	593260	625358	spacer-603	+	32098
Bonobo	CM055480.2	chr8_mat_hsa10	669048	699595	spacer-604	+	30547
Bonobo	CM055480.2	chr8_mat_hsa10	863141	895199	spacer-605	+	32058
Bonobo	CM055480.2	chr8_mat_hsa10	1269248	1301353	spacer-606	+	32105
Bonobo	CM055480.2	chr8_mat_hsa10	2068795	2099369	spacer-607	+	30574
Bonobo	CM055480.2	chr8_mat_hsa10	2450194	2482281	spacer-608	+	32087
Bonobo	CM055480.2	chr8_mat_hsa10	2619832	2650373	spacer-609	+	30541
Bonobo	CM055480.2	chr8_mat_hsa10	3325707	3357772	spacer-610	+	32065
Bonobo	CM055480.2	chr8_mat_hsa10	3502258	3534381	spacer-611	+	32123
Bonobo	CM055480.2	chr8_mat_hsa10	3957400	3989544	spacer-612	+	32144
Bonobo	CM055480.2	chr8_mat_hsa10	4995143	5027227	spacer-613	+	32084
Bonobo	CM055480.2	chr8_mat_hsa10	5214808	5246980	spacer-614	+	32172
Bonobo	CM055480.2	chr8_mat_hsa10	5828190	5858743	spacer-615	+	30553
Bonobo	CM055480.2	chr8_mat_hsa10	6318907	6351011	spacer-616	+	32104
Bonobo	CM055480.2	chr8_mat_hsa10	7750208	7782286	spacer-617	+	32078
Bonobo	CM055480.2	chr8_mat_hsa10	8016079	8046641	spacer-618	+	30562
Bonobo	CM055480.2	chr8_mat_hsa10	8081286	8109983	spacer-619	+	28697
Bonobo	CM055480.2	chr8_mat_hsa10	8502433	8534580	spacer-620	+	32147
Bonobo	CM055480.2	chr8_mat_hsa10	9225674	9257751	spacer-621	+	32077
Bonobo	CM055480.2	chr8_mat_hsa10	9551335	9582630	spacer-622	+	31295
Bonobo	CM055480.2	chr8_mat_hsa10	9815239	9846599	spacer-623	+	31360
Bonobo	CM055480.2	chr8_mat_hsa10	10805286	10835834	spacer-624	+	30548
Bonobo	CM055480.2	chr8_mat_hsa10	10881363	10913551	spacer-625	+	32188
Bonobo	CM055480.2	chr8_mat_hsa10	11067883	11098741	spacer-626	+	30858
Bonobo	CM055480.2	chr8_mat_hsa10	11297024	11329081	spacer-627	+	32057
Bonobo	CM055480.2	chr8_mat_hsa10	11750993	11783033	spacer-628	+	32040
Bonobo	CM055480.2	chr8_mat_hsa10	12303508	12334670	spacer-629	+	31162
Bonobo	CM055480.2	chr8_mat_hsa10	145933749	145964387	spacer-630	-	30638
Bonobo	CM055480.2	chr8_mat_hsa10	146859382	146889952	spacer-631	-	30570
Bonobo	CM055481.2	chr9_pat_hsa11	92332	124452	spacer-632	+	32120
Bonobo	CM055481.2	chr9_pat_hsa11	199058	231145	spacer-633	+	32087
Bonobo	CM055481.2	chr9_pat_hsa11	464471	491444	spacer-634	+	26973
Bonobo	CM055481.2	chr9_pat_hsa11	2299862	2330826	spacer-635	+	30964
Bonobo	CM055482.2	chr10_mat_hsa12	103629	134559	spacer-636	+	30930
Bonobo	CM055482.2	chr10_mat_hsa12	315966	348071	spacer-637	+	32105
Bonobo	CM055482.2	chr10_mat_hsa12	1705562	1737667	spacer-638	+	32105
Bonobo	CM055482.2	chr10_mat_hsa12	2464891	2497011	spacer-639	+	32120
Bonobo	CM055482.2	chr10_mat_hsa12	3288401	3319585	spacer-640	+	31184
Bonobo	CM055482.2	chr10_mat_hsa12	3533979	3565949	spacer-641	+	31970
Bonobo	CM055482.2	chr10_mat_hsa12	4938366	4970218	spacer-642	+	31852
Bonobo	CM055482.2	chr10_mat_hsa12	5097283	5129355	spacer-643	+	32072
Bonobo	CM055482.2	chr10_mat_hsa12	5241408	5272288	spacer-644	+	30880
Bonobo	CM055482.2	chr10_mat_hsa12	141655673	141686253	spacer-645	-	30580
Bonobo	CM055483.2	chr11_mat_hsa9	110915	141486	spacer-646	+	30571
Bonobo	CM055483.2	chr11_mat_hsa9	1040436	1071027	spacer-647	+	30591
Bonobo	CM055483.2	chr11_mat_hsa9	67543157	67573887	spacer-648	-	30730
Bonobo	CM055483.2	chr11_mat_hsa9	124608043	124638646	spacer-649	-	30603
Bonobo	CM055484.2	chr12_mat_hsa2a	80628	112969	spacer-650	+	32341
Bonobo	CM055484.2	chr12_mat_hsa2a	813655	845807	spacer-651	+	32152
Bonobo	CM055484.2	chr12_mat_hsa2a	1067525	1098305	spacer-652	+	30780
Bonobo	CM055484.2	chr12_mat_hsa2a	1633496	1665531	spacer-653	+	32035
Bonobo	CM055484.2	chr12_mat_hsa2a	1723027	1755157	spacer-654	+	32130
Bonobo	CM055484.2	chr12_mat_hsa2a	2101069	2132050	spacer-655	+	30981
Bonobo	CM055484.2	chr12_mat_hsa2a	2218011	2248167	spacer-656	+	30156
Bonobo	CM055484.2	chr12_mat_hsa2a	2447006	2479086	spacer-657	+	32080
Bonobo	CM055484.2	chr12_mat_hsa2a	3112163	3143670	spacer-658	+	31507
Bonobo	CM055484.2	chr12_mat_hsa2a	3585829	3617936	spacer-659	+	32107
Bonobo	CM055484.2	chr12_mat_hsa2a	3790646	3822790	spacer-660	+	32144
Bonobo	CM055484.2	chr12_mat_hsa2a	4097412	4125230	spacer-661	+	27818
Bonobo	CM055484.2	chr12_mat_hsa2a	4682423	4714458	spacer-662	+	32035
Bonobo	CM055484.2	chr12_mat_hsa2a	5301378	5333433	spacer-663	+	32055
Bonobo	CM055484.2	chr12_mat_hsa2a	5474980	5507104	spacer-664	+	32124
Bonobo	CM055484.2	chr12_mat_hsa2a	5676968	5709089	spacer-665	+	32121
Bonobo	CM055484.2	chr12_mat_hsa2a	5804876	5836997	spacer-666	+	32121
Bonobo	CM055484.2	chr12_mat_hsa2a	6688676	6720730	spacer-667	+	32054
Bonobo	CM055484.2	chr12_mat_hsa2a	7485279	7517265	spacer-668	+	31986
Bonobo	CM055484.2	chr12_mat_hsa2a	7647836	7679666	spacer-669	+	31830
Bonobo	CM055484.2	chr12_mat_hsa2a	7757785	7789944	spacer-670	+	32159
Bonobo	CM055484.2	chr12_mat_hsa2a	7943045	7973575	spacer-671	+	30530
Bonobo	CM055484.2	chr12_mat_hsa2a	8005809	8036563	spacer-672	+	30754
Bonobo	CM055484.2	chr12_mat_hsa2a	8239929	8263737	spacer-673	+	23808
Bonobo	CM055484.2	chr12_mat_hsa2a	8748631	8780760	spacer-674	+	32129
Bonobo	CM055484.2	chr12_mat_hsa2a	8874286	8903056	spacer-675	+	28770
Bonobo	CM055484.2	chr12_mat_hsa2a	9067269	9097826	spacer-676	+	30557
Bonobo	CM055484.2	chr12_mat_hsa2a	9401969	9434014	spacer-677	+	32045
Bonobo	CM055484.2	chr12_mat_hsa2a	9600571	9632729	spacer-678	+	32158
Bonobo	CM055484.2	chr12_mat_hsa2a	9804661	9836731	spacer-679	+	32070
Bonobo	CM055484.2	chr12_mat_hsa2a	10173374	10205389	spacer-680	+	32015
Bonobo	CM055484.2	chr12_mat_hsa2a	10392286	10424090	spacer-681	+	31804
Bonobo	CM055484.2	chr12_mat_hsa2a	11089944	11121858	spacer-682	+	31914
Bonobo	CM055484.2	chr12_mat_hsa2a	11184521	11214764	spacer-683	+	30243
Bonobo	CM055484.2	chr12_mat_hsa2a	11961329	11993461	spacer-684	+	32132
Bonobo	CM055484.2	chr12_mat_hsa2a	12462536	12494832	spacer-685	+	32296
Bonobo	CM055484.2	chr12_mat_hsa2a	12752756	12773522	spacer-686	+	20766
Bonobo	CM055484.2	chr12_mat_hsa2a	13147729	13179609	spacer-687	+	31880
Bonobo	CM055484.2	chr12_mat_hsa2a	13289467	13321689	spacer-688	+	32222
Bonobo	CM055484.2	chr12_mat_hsa2a	13673232	13703361	spacer-689	+	30129
Bonobo	CM055484.2	chr12_mat_hsa2a	13863139	13893072	spacer-690	+	29933
Bonobo	CM055484.2	chr12_mat_hsa2a	14078853	14110895	spacer-691	+	32042
Bonobo	CM055484.2	chr12_mat_hsa2a	14174913	14206786	spacer-692	+	31873
Bonobo	CM055484.2	chr12_mat_hsa2a	14463874	14494976	spacer-693	+	31102
Bonobo	CM055485.2	chr13_mat_hsa2b	97451	128048	spacer-694	+	30597
Bonobo	CM055485.2	chr13_mat_hsa2b	466617	498801	spacer-695	+	32184
Bonobo	CM055485.2	chr13_mat_hsa2b	874751	906888	spacer-696	+	32137
Bonobo	CM055485.2	chr13_mat_hsa2b	1298571	1330739	spacer-697	+	32168
Bonobo	CM055485.2	chr13_mat_hsa2b	1798538	1830683	spacer-698	+	32145
Bonobo	CM055485.2	chr13_mat_hsa2b	2143000	2175140	spacer-699	+	32140
Bonobo	CM055485.2	chr13_mat_hsa2b	2567133	2599224	spacer-700	+	32091
Bonobo	CM055485.2	chr13_mat_hsa2b	2900840	2932979	spacer-701	+	32139
Bonobo	CM055485.2	chr13_mat_hsa2b	3089129	3121217	spacer-702	+	32088
Bonobo	CM055485.2	chr13_mat_hsa2b	3157985	3190073	spacer-703	+	32088
Bonobo	CM055485.2	chr13_mat_hsa2b	3503031	3535233	spacer-704	+	32202
Bonobo	CM055485.2	chr13_mat_hsa2b	3665763	3697969	spacer-705	+	32206
Bonobo	CM055485.2	chr13_mat_hsa2b	4114245	4146253	spacer-706	+	32008
Bonobo	CM055485.2	chr13_mat_hsa2b	4300196	4330759	spacer-707	+	30563
Bonobo	CM055485.2	chr13_mat_hsa2b	4604881	4636931	spacer-708	+	32050
Bonobo	CM055485.2	chr13_mat_hsa2b	4775488	4806033	spacer-709	+	30545
Bonobo	CM055485.2	chr13_mat_hsa2b	4931962	4962527	spacer-710	+	30565
Bonobo	CM055485.2	chr13_mat_hsa2b	5038802	5070874	spacer-711	+	32072
Bonobo	CM055485.2	chr13_mat_hsa2b	5271391	5303476	spacer-712	+	32085
Bonobo	CM055485.2	chr13_mat_hsa2b	5867538	5899637	spacer-713	+	32099
Bonobo	CM055485.2	chr13_mat_hsa2b	6132412	6164570	spacer-714	+	32158
Bonobo	CM055485.2	chr13_mat_hsa2b	6653932	6684515	spacer-715	+	30583
Bonobo	CM055485.2	chr13_mat_hsa2b	6795873	6828036	spacer-716	+	32163
Bonobo	CM055485.2	chr13_mat_hsa2b	7951304	7983389	spacer-717	+	32085
Bonobo	CM055485.2	chr13_mat_hsa2b	8498068	8530168	spacer-718	+	32100
Bonobo	CM055485.2	chr13_mat_hsa2b	8672189	8704287	spacer-719	+	32098
Bonobo	CM055485.2	chr13_mat_hsa2b	9000116	9032230	spacer-720	+	32114
Bonobo	CM055485.2	chr13_mat_hsa2b	9114518	9146683	spacer-721	+	32165
Bonobo	CM055485.2	chr13_mat_hsa2b	9557865	9589945	spacer-722	+	32080
Bonobo	CM055485.2	chr13_mat_hsa2b	9822585	9854688	spacer-723	+	32103
Bonobo	CM055485.2	chr13_mat_hsa2b	10104265	10136337	spacer-724	+	32072
Bonobo	CM055485.2	chr13_mat_hsa2b	10616499	10648595	spacer-725	+	32096
Bonobo	CM055485.2	chr13_mat_hsa2b	10743862	10776036	spacer-726	+	32174
Bonobo	CM055485.2	chr13_mat_hsa2b	11208284	11238801	spacer-727	+	30517
Bonobo	CM055485.2	chr13_mat_hsa2b	11645534	11677641	spacer-728	+	32107
Bonobo	CM055485.2	chr13_mat_hsa2b	11928659	11960731	spacer-729	+	32072
Bonobo	CM055485.2	chr13_mat_hsa2b	12552556	12584650	spacer-730	+	32094
Bonobo	CM055485.2	chr13_mat_hsa2b	12692453	12724602	spacer-731	+	32149
Bonobo	CM055485.2	chr13_mat_hsa2b	13230159	13262230	spacer-732	+	32071
Bonobo	CM055485.2	chr13_mat_hsa2b	13584119	13616227	spacer-733	+	32108
Bonobo	CM055485.2	chr13_mat_hsa2b	13929744	13961842	spacer-734	+	32098
Bonobo	CM055485.2	chr13_mat_hsa2b	14358542	14390658	spacer-735	+	32116
Bonobo	CM055485.2	chr13_mat_hsa2b	14457103	14489272	spacer-736	+	32169
Bonobo	CM055485.2	chr13_mat_hsa2b	14854690	14886775	spacer-737	+	32085
Bonobo	CM055485.2	chr13_mat_hsa2b	144688911	144721460	spacer-738	-	32549
Bonobo	CM055486.2	chr14_pat_hsa13	46163053	46193602	spacer-739	+	30549
Bonobo	CM055486.2	chr14_pat_hsa13	46292276	46324367	spacer-740	+	32091
Bonobo	CM055486.2	chr14_pat_hsa13	46612177	46644293	spacer-741	+	32116
Bonobo	CM055486.2	chr14_pat_hsa13	46730973	46763084	spacer-742	+	32111
Bonobo	CM055486.2	chr14_pat_hsa13	46903446	46933936	spacer-743	+	30490
Bonobo	CM055486.2	chr14_pat_hsa13	47059658	47090583	spacer-744	+	30925
Bonobo	CM055486.2	chr14_pat_hsa13	47390876	47421250	spacer-745	+	30374
Bonobo	CM055486.2	chr14_pat_hsa13	47505517	47536045	spacer-746	+	30528
Bonobo	CM055486.2	chr14_pat_hsa13	47674523	47700433	spacer-747	+	25910
Bonobo	CM055486.2	chr14_pat_hsa13	47854514	47885441	spacer-748	+	30927
Bonobo	CM055486.2	chr14_pat_hsa13	115950544	115981086	spacer-749	-	30542
Bonobo	CM055487.2	chr15_mat_hsa14	108329054	108359819	spacer-750	-	30765
Bonobo	CM055488.2	chr16_pat_hsa15	80140	112573	spacer-751	+	32433
Bonobo	CM055488.2	chr16_pat_hsa15	266925	291799	spacer-752	+	24874
Bonobo	CM055488.2	chr16_pat_hsa15	1106802	1138970	spacer-753	+	32168
Bonobo	CM055488.2	chr16_pat_hsa15	1321799	1344178	spacer-754	+	22379
Bonobo	CM055488.2	chr16_pat_hsa15	1381868	1413935	spacer-755	+	32067
Bonobo	CM055488.2	chr16_pat_hsa15	2209695	2232942	spacer-756	+	23247
Bonobo	CM055488.2	chr16_pat_hsa15	2340744	2372780	spacer-757	+	32036
Bonobo	CM055488.2	chr16_pat_hsa15	2573510	2603972	spacer-758	+	30462
Bonobo	CM055488.2	chr16_pat_hsa15	3230125	3260653	spacer-759	+	30528
Bonobo	CM055488.2	chr16_pat_hsa15	3408466	3436470	spacer-760	+	28004
Bonobo	CM055488.2	chr16_pat_hsa15	4131738	4161447	spacer-761	+	29709
Bonobo	CM055488.2	chr16_pat_hsa15	4299771	4324860	spacer-762	+	25089
Bonobo	CM055488.2	chr16_pat_hsa15	4333325	4363807	spacer-763	+	30482
Bonobo	CM055488.2	chr16_pat_hsa15	4413261	4445251	spacer-764	+	31990
Bonobo	CM055488.2	chr16_pat_hsa15	4461360	4491933	spacer-765	+	30573
Bonobo	CM055488.2	chr16_pat_hsa15	4853676	4886097	spacer-766	+	32421
Bonobo	CM055488.2	chr16_pat_hsa15	91732723	91763711	spacer-767	-	30988
Bonobo	CM055489.2	chr17_mat_hsa18	98074128	98104753	spacer-768	-	30625
Bonobo	CM055490.2	chr18_pat_hsa16	94223	124839	spacer-769	+	30616
Bonobo	CM055490.2	chr18_pat_hsa16	100374802	100405356	spacer-770	-	30554
Bonobo	CM055491.2	chr19_pat_hsa17	58774	90887	spacer-771	+	32113
Bonobo	CM055491.2	chr19_pat_hsa17	1279358	1311452	spacer-772	+	32094
Bonobo	CM055491.2	chr19_pat_hsa17	1604302	1636422	spacer-773	+	32120
Bonobo	CM055491.2	chr19_pat_hsa17	1935346	1964718	spacer-774	+	29372
Bonobo	CM055491.2	chr19_pat_hsa17	2042020	2072552	spacer-775	+	30532
Bonobo	CM055491.2	chr19_pat_hsa17	2349514	2380079	spacer-776	+	30565
Bonobo	CM055491.2	chr19_pat_hsa17	3356316	3387929	spacer-777	+	31613
Bonobo	CM055491.2	chr19_pat_hsa17	3718732	3750854	spacer-778	+	32122
Bonobo	CM055491.2	chr19_pat_hsa17	5097772	5129802	spacer-779	+	32030
Bonobo	CM055491.2	chr19_pat_hsa17	5544978	5577079	spacer-780	+	32101
Bonobo	CM055491.2	chr19_pat_hsa17	5854093	5886222	spacer-781	+	32129
Bonobo	CM055491.2	chr19_pat_hsa17	7499795	7530706	spacer-782	+	30911
Bonobo	CM055491.2	chr19_pat_hsa17	100001124	100032105	spacer-783	-	30981
Bonobo	CM055491.2	chr19_pat_hsa17	100292684	100323322	spacer-784	-	30638
Bonobo	CM055491.2	chr19_pat_hsa17	100670049	100701012	spacer-785	-	30963
Bonobo	CM055492.2	chr20_pat_hsa19	87012	119040	spacer-786	+	32028
Bonobo	CM055492.2	chr20_pat_hsa19	369220	401439	spacer-787	+	32219
Bonobo	CM055492.2	chr20_pat_hsa19	505467	537914	spacer-788	+	32447
Bonobo	CM055492.2	chr20_pat_hsa19	996447	1078600	spacer-789	+	82153
Bonobo	CM055492.2	chr20_pat_hsa19	1247101	1279231	spacer-790	+	32130
Bonobo	CM055492.2	chr20_pat_hsa19	1691140	1721683	spacer-791	+	30543
Bonobo	CM055492.2	chr20_pat_hsa19	2064285	2095534	spacer-792	+	31249
Bonobo	CM055492.2	chr20_pat_hsa19	2528978	2561117	spacer-793	+	32139
Bonobo	CM055492.2	chr20_pat_hsa19	3209532	3241739	spacer-794	+	32207
Bonobo	CM055492.2	chr20_pat_hsa19	3559673	3590283	spacer-795	+	30610
Bonobo	CM055492.2	chr20_pat_hsa19	3916029	3948232	spacer-796	+	32203
Bonobo	CM055492.2	chr20_pat_hsa19	65006371	65039579	spacer-797	-	33208
Bonobo	CM055492.2	chr20_pat_hsa19	65237484	65269607	spacer-798	-	32123
Bonobo	CM055492.2	chr20_pat_hsa19	65367738	65398324	spacer-799	-	30586
Bonobo	CM055492.2	chr20_pat_hsa19	65507170	65537767	spacer-800	-	30597
Bonobo	CM055492.2	chr20_pat_hsa19	65906762	65937361	spacer-801	-	30599
Bonobo	CM055492.2	chr20_pat_hsa19	66881638	66913587	spacer-802	-	31949
Bonobo	CM055492.2	chr20_pat_hsa19	69417117	69449217	spacer-803	-	32100
Bonobo	CM055492.2	chr20_pat_hsa19	70356221	70386739	spacer-804	-	30518
Bonobo	CM055492.2	chr20_pat_hsa19	70603192	70634105	spacer-805	-	30913
Bonobo	CM055493.2	chr21_mat_hsa20	92037	122836	spacer-806	+	30799
Bonobo	CM055493.2	chr21_mat_hsa20	281364	311896	spacer-807	+	30532
Bonobo	CM055493.2	chr21_mat_hsa20	637102	667165	spacer-808	+	30063
Bonobo	CM055493.2	chr21_mat_hsa20	853916	884064	spacer-809	+	30148
Bonobo	CM055493.2	chr21_mat_hsa20	1070851	1102087	spacer-810	+	31236
Bonobo	CM055493.2	chr21_mat_hsa20	70335458	70366374	spacer-811	-	30916
Bonobo	CM055493.2	chr21_mat_hsa20	71083960	71116133	spacer-812	-	32173
Bonobo	CM055493.2	chr21_mat_hsa20	71413065	71445141	spacer-813	-	32076
Bonobo	CM055493.2	chr21_mat_hsa20	71612245	71644483	spacer-814	-	32238
Bonobo	CM055493.2	chr21_mat_hsa20	72254353	72286476	spacer-815	-	32123
Bonobo	CM055493.2	chr21_mat_hsa20	72511611	72549861	spacer-816	-	38250
Bonobo	CM055493.2	chr21_mat_hsa20	72845400	72877422	spacer-817	-	32022
Bonobo	CM055493.2	chr21_mat_hsa20	73159723	73191811	spacer-818	-	32088
Bonobo	CM055493.2	chr21_mat_hsa20	73260803	73293090	spacer-819	-	32287
Bonobo	CM055493.2	chr21_mat_hsa20	74130074	74162235	spacer-820	-	32161
Bonobo	CM055493.2	chr21_mat_hsa20	74835827	74867988	spacer-821	-	32161
Bonobo	CM055493.2	chr21_mat_hsa20	74943856	74975976	spacer-822	-	32120
Bonobo	CM055493.2	chr21_mat_hsa20	75438082	75470262	spacer-823	-	32180
Bonobo	CM055493.2	chr21_mat_hsa20	75952073	75984024	spacer-824	-	31951
Bonobo	CM055493.2	chr21_mat_hsa20	76042203	76074308	spacer-825	-	32105
Bonobo	CM055493.2	chr21_mat_hsa20	76278949	76311124	spacer-826	-	32175
Bonobo	CM055493.2	chr21_mat_hsa20	76669329	76700249	spacer-827	-	30920
Bonobo	CM055494.2	chr22_pat_hsa21	42914533	42945405	spacer-828	-	30872
Bonobo	CM055494.2	chr22_pat_hsa21	44600220	44632320	spacer-829	-	32100
Bonobo	CM055494.2	chr22_pat_hsa21	44682620	44710456	spacer-830	-	27836
Bonobo	CM055494.2	chr22_pat_hsa21	45015740	45045908	spacer-831	-	30168
Bonobo	CM055494.2	chr22_pat_hsa21	46217996	46248581	spacer-832	-	30585
Bonobo	CM055494.2	chr22_pat_hsa21	46404273	46436362	spacer-833	-	32089
Bonobo	CM055494.2	chr22_pat_hsa21	47131161	47163359	spacer-834	-	32198
Bonobo	CM055494.2	chr22_pat_hsa21	48376172	48407097	spacer-835	-	30925
Bonobo	CM055495.2	chrX_mat_hsaX	156009256	156040006	spacer-836	-	30750
Bonobo	CM055495.2	chrX_mat_hsaX	156404472	156433205	spacer-837	-	28733
Bonobo	CM055495.2	chrX_mat_hsaX	156753183	156784108	spacer-838	-	30925
Bonobo	CM055495.2	chrX_mat_hsaX	157894430	157926531	spacer-839	-	32101
Bonobo	CM055495.2	chrX_mat_hsaX	158036097	158068337	spacer-840	-	32240
Bonobo	CM055495.2	chrX_mat_hsaX	158674277	158706414	spacer-841	-	32137
Bonobo	CM055495.2	chrX_mat_hsaX	158947897	158980009	spacer-842	-	32112
Bonobo	CM055496.2	chrY_pat_hsaY	94392	126380	spacer-843	+	31988
Bonobo	CM068940.1	chr2_pat_hsa3	196241165	196271930	spacer-844	-	30765
Bonobo	CM068944.1	chr2_mat_hsa3	196171178	196201947	spacer-845	-	30769
Bonobo	CM068945.1	chr23_pat_hsa22	60802520	60825996	spacer-846	-	23476
Bonobo	CM068945.1	chr23_pat_hsa22	61311382	61341990	spacer-847	-	30608
Bonobo	CM068945.1	chr23_pat_hsa22	62565799	62596364	spacer-848	-	30565
Bonobo	CM068945.1	chr23_pat_hsa22	63308420	63339000	spacer-849	-	30580
Bonobo	CM068945.1	chr23_pat_hsa22	63791110	63821636	spacer-850	-	30526
Bonobo	CM068945.1	chr23_pat_hsa22	63853872	63885984	spacer-851	-	32112
Bonobo	CM068945.1	chr23_pat_hsa22	64259554	64290113	spacer-852	-	30559
Bonobo	CM068945.1	chr23_pat_hsa22	64339614	64371801	spacer-853	-	32187
Bonobo	CM068945.1	chr23_pat_hsa22	64776845	64807287	spacer-854	-	30442
Bonobo	CM068945.1	chr23_pat_hsa22	64930138	64961197	spacer-855	-	31059
Bonobo	CM068947.1	chr23_mat_hsa22	66133438	66164848	spacer-856	-	31410
Bonobo	CM068947.1	chr23_mat_hsa22	66680228	66712232	spacer-857	-	32004
Bonobo	CM068947.1	chr23_mat_hsa22	67386756	67417379	spacer-858	-	30623
Bonobo	CM068947.1	chr23_mat_hsa22	69061492	69093560	spacer-859	-	32068
Gorilla	CM054563.2	chr5_pat_hsa6	20318	54320	spacer-1	+	34002
Gorilla	CM054563.2	chr5_pat_hsa6	88084	122085	spacer-2	+	34001
Gorilla	CM054563.2	chr5_pat_hsa6	240866	274872	spacer-3	+	34006
Gorilla	CM054563.2	chr5_pat_hsa6	952680	986703	spacer-4	+	34023
Gorilla	CM054563.2	chr5_pat_hsa6	1665018	1699088	spacer-5	+	34070
Gorilla	CM054563.2	chr5_pat_hsa6	2005581	2039653	spacer-6	+	34072
Gorilla	CM054563.2	chr5_pat_hsa6	2194815	2228850	spacer-7	+	34035
Gorilla	CM054563.2	chr5_pat_hsa6	2765321	2799392	spacer-8	+	34071
Gorilla	CM054563.2	chr5_pat_hsa6	3240240	3274308	spacer-9	+	34068
Gorilla	CM054563.2	chr5_pat_hsa6	3453524	3487564	spacer-10	+	34040
Gorilla	CM054563.2	chr5_pat_hsa6	3617727	3651766	spacer-11	+	34039
Gorilla	CM054563.2	chr5_pat_hsa6	3752861	3786900	spacer-12	+	34039
Gorilla	CM054563.2	chr5_pat_hsa6	4010677	4044715	spacer-13	+	34038
Gorilla	CM054563.2	chr5_pat_hsa6	4505199	4539237	spacer-14	+	34038
Gorilla	CM054563.2	chr5_pat_hsa6	4674727	4708772	spacer-15	+	34045
Gorilla	CM054563.2	chr5_pat_hsa6	5049467	5083468	spacer-16	+	34001
Gorilla	CM054563.2	chr5_pat_hsa6	5106363	5140373	spacer-17	+	34010
Gorilla	CM054563.2	chr5_pat_hsa6	5570918	5600117	spacer-18	+	29199
Gorilla	CM054563.2	chr5_pat_hsa6	5631759	5660996	spacer-19	+	29237
Gorilla	CM054563.2	chr5_pat_hsa6	7666674	7700711	spacer-20	+	34037
Gorilla	CM054563.2	chr5_pat_hsa6	7740648	7774677	spacer-21	+	34029
Gorilla	CM054563.2	chr5_pat_hsa6	8376437	8410316	spacer-22	+	33879
Gorilla	CM054563.2	chr5_pat_hsa6	9061661	9095540	spacer-23	+	33879
Gorilla	CM054563.2	chr5_pat_hsa6	9508158	9541298	spacer-24	+	33140
Gorilla	CM054563.2	chr5_pat_hsa6	9896797	9929897	spacer-25	+	33100
Gorilla	CM054563.2	chr5_pat_hsa6	186605673	186639859	spacer-26	-	34186
Gorilla	CM054563.2	chr5_pat_hsa6	186974699	187008465	spacer-27	-	33766
Gorilla	CM054563.2	chr5_pat_hsa6	187061606	187095385	spacer-28	-	33779
Gorilla	CM054563.2	chr5_pat_hsa6	187609762	187643619	spacer-29	-	33857
Gorilla	CM054563.2	chr5_pat_hsa6	187988884	188010643	spacer-30	-	21759
Gorilla	CM054563.2	chr5_pat_hsa6	188008746	188030524	spacer-31	-	21778
Gorilla	CM054563.2	chr5_pat_hsa6	188028627	188062480	spacer-32	-	33853
Gorilla	CM054563.2	chr5_pat_hsa6	188062861	188084623	spacer-33	-	21762
Gorilla	CM054564.2	chr6_pat_hsa7	513826	547940	spacer-34	+	34114
Gorilla	CM054564.2	chr6_pat_hsa7	836832	870956	spacer-35	+	34124
Gorilla	CM054564.2	chr6_pat_hsa7	1159014	1193139	spacer-36	+	34125
Gorilla	CM054564.2	chr6_pat_hsa7	1524635	1558763	spacer-37	+	34128
Gorilla	CM054564.2	chr6_pat_hsa7	1956084	1990212	spacer-38	+	34128
Gorilla	CM054564.2	chr6_pat_hsa7	2449886	2482777	spacer-39	+	32891
Gorilla	CM054564.2	chr6_pat_hsa7	2557900	2590226	spacer-40	+	32326
Gorilla	CM054564.2	chr6_pat_hsa7	2998490	3031805	spacer-41	+	33315
Gorilla	CM054564.2	chr6_pat_hsa7	4519051	4553039	spacer-42	+	33988
Gorilla	CM054564.2	chr6_pat_hsa7	4802044	4836043	spacer-43	+	33999
Gorilla	CM054564.2	chr6_pat_hsa7	5493318	5527304	spacer-44	+	33986
Gorilla	CM054564.2	chr6_pat_hsa7	5900554	5934532	spacer-45	+	33978
Gorilla	CM054564.2	chr6_pat_hsa7	7015996	7050047	spacer-46	+	34051
Gorilla	CM054564.2	chr6_pat_hsa7	7286665	7320710	spacer-47	+	34045
Gorilla	CM054564.2	chr6_pat_hsa7	7454642	7478136	spacer-48	+	23494
Gorilla	CM054564.2	chr6_pat_hsa7	171575182	171609268	spacer-49	-	34086
Gorilla	CM054564.2	chr6_pat_hsa7	171749639	171771398	spacer-50	-	21759
Gorilla	CM054564.2	chr6_pat_hsa7	171769501	171803594	spacer-51	-	34093
Gorilla	CM054564.2	chr6_pat_hsa7	172834316	172867520	spacer-52	-	33204
Gorilla	CM054564.2	chr6_pat_hsa7	173610287	173643831	spacer-53	-	33544
Gorilla	CM054564.2	chr6_pat_hsa7	174142174	174175462	spacer-54	-	33288
Gorilla	CM054564.2	chr6_pat_hsa7	175150076	175183338	spacer-55	-	33262
Gorilla	CM054564.2	chr6_pat_hsa7	175323734	175349302	spacer-56	-	25568
Gorilla	CM054564.2	chr6_pat_hsa7	175777901	175800526	spacer-57	-	22625
Gorilla	CM054564.2	chr6_pat_hsa7	176307443	176330062	spacer-58	-	22619
Gorilla	CM054568.2	chr10_pat_hsa12	248339	282423	spacer-59	+	34084
Gorilla	CM054568.2	chr10_pat_hsa12	534518	568603	spacer-60	+	34085
Gorilla	CM054568.2	chr10_pat_hsa12	818998	853086	spacer-61	+	34088
Gorilla	CM054568.2	chr10_pat_hsa12	1145287	1179377	spacer-62	+	34090
Gorilla	CM054568.2	chr10_pat_hsa12	1679413	1713412	spacer-63	+	33999
Gorilla	CM054568.2	chr10_pat_hsa12	1861455	1895451	spacer-64	+	33996
Gorilla	CM054568.2	chr10_pat_hsa12	2043497	2077489	spacer-65	+	33992
Gorilla	CM054568.2	chr10_pat_hsa12	2289134	2323156	spacer-66	+	34022
Gorilla	CM054568.2	chr10_pat_hsa12	2673880	2707889	spacer-67	+	34009
Gorilla	CM054568.2	chr10_pat_hsa12	3504185	3538281	spacer-68	+	34096
Gorilla	CM054568.2	chr10_pat_hsa12	4425719	4457761	spacer-69	+	32042
Gorilla	CM054568.2	chr10_pat_hsa12	4550174	4584238	spacer-70	+	34064
Gorilla	CM054568.2	chr10_pat_hsa12	4986274	5020309	spacer-71	+	34035
Gorilla	CM054568.2	chr10_pat_hsa12	5273027	5307057	spacer-72	+	34030
Gorilla	CM054568.2	chr10_pat_hsa12	5497863	5531937	spacer-73	+	34074
Gorilla	CM054568.2	chr10_pat_hsa12	5600828	5634902	spacer-74	+	34074
Gorilla	CM054568.2	chr10_pat_hsa12	5836069	5870235	spacer-75	+	34166
Gorilla	CM054568.2	chr10_pat_hsa12	6287834	6321731	spacer-76	+	33897
Gorilla	CM054568.2	chr10_pat_hsa12	6322144	6356031	spacer-77	+	33887
Gorilla	CM054568.2	chr10_pat_hsa12	6356444	6390328	spacer-78	+	33884
Gorilla	CM054568.2	chr10_pat_hsa12	6390741	6424628	spacer-79	+	33887
Gorilla	CM054568.2	chr10_pat_hsa12	6425041	6458922	spacer-80	+	33881
Gorilla	CM054568.2	chr10_pat_hsa12	6672691	6706790	spacer-81	+	34099
Gorilla	CM054568.2	chr10_pat_hsa12	6866752	6900869	spacer-82	+	34117
Gorilla	CM054568.2	chr10_pat_hsa12	7278396	7312513	spacer-83	+	34117
Gorilla	CM054568.2	chr10_pat_hsa12	7817532	7851425	spacer-84	+	33893
Gorilla	CM054568.2	chr10_pat_hsa12	8018104	8052220	spacer-85	+	34116
Gorilla	CM054568.2	chr10_pat_hsa12	8411690	8445784	spacer-86	+	34094
Gorilla	CM054568.2	chr10_pat_hsa12	8839924	8874058	spacer-87	+	34134
Gorilla	CM054568.2	chr10_pat_hsa12	8885210	8919327	spacer-88	+	34117
Gorilla	CM054568.2	chr10_pat_hsa12	9032984	9067113	spacer-89	+	34129
Gorilla	CM054568.2	chr10_pat_hsa12	9558552	9587787	spacer-90	+	29235
Gorilla	CM054568.2	chr10_pat_hsa12	10436153	10465382	spacer-91	+	29229
Gorilla	CM054568.2	chr10_pat_hsa12	11343133	11372362	spacer-92	+	29229
Gorilla	CM054568.2	chr10_pat_hsa12	11629840	11659072	spacer-93	+	29232
Gorilla	CM054568.2	chr10_pat_hsa12	11954440	11987564	spacer-94	+	33124
Gorilla	CM054568.2	chr10_pat_hsa12	12409161	12442066	spacer-95	+	32905
Gorilla	CM054568.2	chr10_pat_hsa12	12589416	12621772	spacer-96	+	32356
Gorilla	CM054568.2	chr10_pat_hsa12	13237946	13270292	spacer-97	+	32346
Gorilla	CM054568.2	chr10_pat_hsa12	13439908	13472849	spacer-98	+	32941
Gorilla	CM054568.2	chr10_pat_hsa12	13605635	13639151	spacer-99	+	33516
Gorilla	CM054568.2	chr10_pat_hsa12	14903672	14930032	spacer-100	+	26360
Gorilla	CM054568.2	chr10_pat_hsa12	149650478	149684583	spacer-101	-	34105
Gorilla	CM054568.2	chr10_pat_hsa12	149839948	149866793	spacer-102	-	26845
Gorilla	CM054568.2	chr10_pat_hsa12	149939161	149972080	spacer-103	-	32919
Gorilla	CM054568.2	chr10_pat_hsa12	150657506	150691120	spacer-104	-	33614
Gorilla	CM054568.2	chr10_pat_hsa12	150796928	150830174	spacer-105	-	33246
Gorilla	CM054568.2	chr10_pat_hsa12	151036420	151068559	spacer-106	-	32139
Gorilla	CM054568.2	chr10_pat_hsa12	151307801	151341193	spacer-107	-	33392
Gorilla	CM054568.2	chr10_pat_hsa12	151751720	151785027	spacer-108	-	33307
Gorilla	CM054568.2	chr10_pat_hsa12	151821361	151854347	spacer-109	-	32986
Gorilla	CM054568.2	chr10_pat_hsa12	151854696	151887943	spacer-110	-	33247
Gorilla	CM054568.2	chr10_pat_hsa12	152753026	152785321	spacer-111	-	32295
Gorilla	CM054568.2	chr10_pat_hsa12	153586948	153618944	spacer-112	-	31996
Gorilla	CM054568.2	chr10_pat_hsa12	154055188	154089244	spacer-113	-	34056
Gorilla	CM054568.2	chr10_pat_hsa12	154508685	154542724	spacer-114	-	34039
Gorilla	CM054568.2	chr10_pat_hsa12	154835790	154869664	spacer-115	-	33874
Gorilla	CM054568.2	chr10_pat_hsa12	154880049	154914074	spacer-116	-	34025
Gorilla	CM054568.2	chr10_pat_hsa12	155160466	155194496	spacer-117	-	34030
Gorilla	CM054568.2	chr10_pat_hsa12	155720403	155754510	spacer-118	-	34107
Gorilla	CM054568.2	chr10_pat_hsa12	156479692	156513806	spacer-119	-	34114
Gorilla	CM054568.2	chr10_pat_hsa12	156687531	156721640	spacer-120	-	34109
Gorilla	CM054568.2	chr10_pat_hsa12	157998925	158033030	spacer-121	-	34105
Gorilla	CM054568.2	chr10_pat_hsa12	158645401	158679507	spacer-122	-	34106
Gorilla	CM054569.2	chr11_pat_hsa2b	108064	139182	spacer-123	+	31118
Gorilla	CM054569.2	chr11_pat_hsa2b	472600	506718	spacer-124	+	34118
Gorilla	CM054569.2	chr11_pat_hsa2b	609882	644061	spacer-125	+	34179
Gorilla	CM054569.2	chr11_pat_hsa2b	665937	700042	spacer-126	+	34105
Gorilla	CM054569.2	chr11_pat_hsa2b	714273	748368	spacer-127	+	34095
Gorilla	CM054569.2	chr11_pat_hsa2b	1040447	1074560	spacer-128	+	34113
Gorilla	CM054569.2	chr11_pat_hsa2b	1137307	1171447	spacer-129	+	34140
Gorilla	CM054569.2	chr11_pat_hsa2b	1687601	1721682	spacer-130	+	34081
Gorilla	CM054569.2	chr11_pat_hsa2b	1849373	1883457	spacer-131	+	34084
Gorilla	CM054569.2	chr11_pat_hsa2b	2334999	2369085	spacer-132	+	34086
Gorilla	CM054569.2	chr11_pat_hsa2b	2453979	2488065	spacer-133	+	34086
Gorilla	CM054569.2	chr11_pat_hsa2b	2592752	2627061	spacer-134	+	34309
Gorilla	CM054569.2	chr11_pat_hsa2b	2646503	2680627	spacer-135	+	34124
Gorilla	CM054569.2	chr11_pat_hsa2b	3048543	3082547	spacer-136	+	34004
Gorilla	CM054569.2	chr11_pat_hsa2b	3722431	3756487	spacer-137	+	34056
Gorilla	CM054569.2	chr11_pat_hsa2b	4148177	4182295	spacer-138	+	34118
Gorilla	CM054569.2	chr11_pat_hsa2b	4441117	4473140	spacer-139	+	32023
Gorilla	CM054569.2	chr11_pat_hsa2b	4617964	4649937	spacer-140	+	31973
Gorilla	CM054569.2	chr11_pat_hsa2b	4795473	4827470	spacer-141	+	31997
Gorilla	CM054569.2	chr11_pat_hsa2b	4956494	4988462	spacer-142	+	31968
Gorilla	CM054569.2	chr11_pat_hsa2b	5135329	5167349	spacer-143	+	32020
Gorilla	CM054569.2	chr11_pat_hsa2b	5345115	5377152	spacer-144	+	32037
Gorilla	CM054569.2	chr11_pat_hsa2b	5497078	5529117	spacer-145	+	32039
Gorilla	CM054569.2	chr11_pat_hsa2b	5538059	5570098	spacer-146	+	32039
Gorilla	CM054569.2	chr11_pat_hsa2b	5670232	5702260	spacer-147	+	32028
Gorilla	CM054569.2	chr11_pat_hsa2b	6154407	6186720	spacer-148	+	32313
Gorilla	CM054569.2	chr11_pat_hsa2b	6488789	6521484	spacer-149	+	32695
Gorilla	CM054569.2	chr11_pat_hsa2b	6563434	6596131	spacer-150	+	32697
Gorilla	CM054569.2	chr11_pat_hsa2b	8045735	8077353	spacer-151	+	31618
Gorilla	CM054569.2	chr11_pat_hsa2b	8194093	8226953	spacer-152	+	32860
Gorilla	CM054569.2	chr11_pat_hsa2b	139523161	139557239	spacer-153	-	34078
Gorilla	CM054569.2	chr11_pat_hsa2b	140535007	140567931	spacer-154	-	32924
Gorilla	CM054569.2	chr11_pat_hsa2b	140568280	140601844	spacer-155	-	33564
Gorilla	CM054569.2	chr11_pat_hsa2b	140924828	140958008	spacer-156	-	33180
Gorilla	CM054569.2	chr11_pat_hsa2b	141436203	141470386	spacer-157	-	34183
Gorilla	CM054569.2	chr11_pat_hsa2b	141722674	141756741	spacer-158	-	34067
Gorilla	CM054569.2	chr11_pat_hsa2b	142310970	142344988	spacer-159	-	34018
Gorilla	CM054569.2	chr11_pat_hsa2b	142478353	142512371	spacer-160	-	34018
Gorilla	CM054569.2	chr11_pat_hsa2b	142650313	142684333	spacer-161	-	34020
Gorilla	CM054569.2	chr11_pat_hsa2b	142833275	142867401	spacer-162	-	34126
Gorilla	CM054569.2	chr11_pat_hsa2b	143722959	143756860	spacer-163	-	33901
Gorilla	CM054575.2	chr17_pat_hsa18	102346605	102380558	spacer-164	-	33953
Gorilla	CM054575.2	chr17_pat_hsa18	102637633	102671597	spacer-165	-	33964
Gorilla	CM054575.2	chr17_pat_hsa18	103047919	103081878	spacer-166	-	33959
Gorilla	CM054575.2	chr17_pat_hsa18	103188515	103222619	spacer-167	-	34104
Gorilla	CM054575.2	chr17_pat_hsa18	103416077	103450178	spacer-168	-	34101
Gorilla	CM054575.2	chr17_pat_hsa18	103955775	103988698	spacer-169	-	32923
Gorilla	CM054575.2	chr17_pat_hsa18	104436914	104470103	spacer-170	-	33189
Gorilla	CM054575.2	chr17_pat_hsa18	104783485	104816407	spacer-171	-	32922
Gorilla	CM054575.2	chr17_pat_hsa18	105515432	105548628	spacer-172	-	33196
Gorilla	CM054575.2	chr17_pat_hsa18	106566365	106593297	spacer-173	-	26932
Gorilla	CM054575.2	chr17_pat_hsa18	106785057	106818228	spacer-174	-	33171
Gorilla	CM054575.2	chr17_pat_hsa18	106841663	106874834	spacer-175	-	33171
Gorilla	CM054575.2	chr17_pat_hsa18	107124838	107158173	spacer-176	-	33335
Gorilla	CM054575.2	chr17_pat_hsa18	107158522	107191485	spacer-177	-	32963
Gorilla	CM054575.2	chr17_pat_hsa18	107191834	107224802	spacer-178	-	32968
Gorilla	CM054575.2	chr17_pat_hsa18	107225151	107258120	spacer-179	-	32969
Gorilla	CM054575.2	chr17_pat_hsa18	107258469	107291447	spacer-180	-	32978
Gorilla	CM054578.2	chr20_pat_hsa19	815419	848473	spacer-181	+	33054
Gorilla	CM054578.2	chr20_pat_hsa19	848854	881712	spacer-182	+	32858
Gorilla	CM054578.2	chr20_pat_hsa19	882093	914931	spacer-183	+	32838
Gorilla	CM054578.2	chr20_pat_hsa19	1082180	1115575	spacer-184	+	33395
Gorilla	CM054578.2	chr20_pat_hsa19	1373938	1408046	spacer-185	+	34108
Gorilla	CM054578.2	chr20_pat_hsa19	1563697	1597037	spacer-186	+	33340
Gorilla	CM054578.2	chr20_pat_hsa19	1597418	1630257	spacer-187	+	32839
Gorilla	CM054578.2	chr20_pat_hsa19	2542166	2576246	spacer-188	+	34080
Gorilla	CM054578.2	chr20_pat_hsa19	3679102	3713181	spacer-189	+	34079
Gorilla	CM054578.2	chr20_pat_hsa19	3841139	3875219	spacer-190	+	34080
Gorilla	CM054578.2	chr20_pat_hsa19	3934466	3968553	spacer-191	+	34087
Gorilla	CM054578.2	chr20_pat_hsa19	4267260	4301280	spacer-192	+	34020
Gorilla	CM054578.2	chr20_pat_hsa19	5030812	5063749	spacer-193	+	32937
Gorilla	CM054578.2	chr20_pat_hsa19	5929856	5963217	spacer-194	+	33361
Gorilla	CM054578.2	chr20_pat_hsa19	6468236	6501515	spacer-195	+	33279
Gorilla	CM054578.2	chr20_pat_hsa19	70499684	70533790	spacer-196	-	34106
Gorilla	CM054578.2	chr20_pat_hsa19	70915227	70949281	spacer-197	-	34054
Gorilla	CM054578.2	chr20_pat_hsa19	71336562	71370604	spacer-198	-	34042
Gorilla	CM054578.2	chr20_pat_hsa19	71417745	71451787	spacer-199	-	34042
Gorilla	CM054578.2	chr20_pat_hsa19	71899523	71933564	spacer-200	-	34041
Gorilla	CM054578.2	chr20_pat_hsa19	72513355	72547394	spacer-201	-	34039
Gorilla	CM054578.2	chr20_pat_hsa19	73162852	73196890	spacer-202	-	34038
Gorilla	CM054578.2	chr20_pat_hsa19	73562669	73596711	spacer-203	-	34042
Gorilla	CM054578.2	chr20_pat_hsa19	73942365	73976406	spacer-204	-	34041
Gorilla	CM054578.2	chr20_pat_hsa19	74087091	74109779	spacer-205	-	22688
Gorilla	CM054578.2	chr20_pat_hsa19	74775427	74809531	spacer-206	-	34104
Gorilla	CM054578.2	chr20_pat_hsa19	75336304	75368406	spacer-207	-	32102
Gorilla	CM054578.2	chr20_pat_hsa19	75465308	75498326	spacer-208	-	33018
Gorilla	CM054578.2	chr20_pat_hsa19	75587307	75619294	spacer-209	-	31987
Gorilla	CM054580.2	chr22_pat_hsa21	48192926	48227032	spacer-210	-	34106
Gorilla	CM054580.2	chr22_pat_hsa21	48656030	48687177	spacer-211	-	31147
Gorilla	CM054580.2	chr22_pat_hsa21	48749501	48780637	spacer-212	-	31136
Gorilla	CM054580.2	chr22_pat_hsa21	49073504	49104640	spacer-213	-	31136
Gorilla	CM054580.2	chr22_pat_hsa21	49537890	49569007	spacer-214	-	31117
Gorilla	CM054580.2	chr22_pat_hsa21	50578037	50612152	spacer-215	-	34115
Gorilla	CM054580.2	chr22_pat_hsa21	51648764	51682890	spacer-216	-	34126
Gorilla	CM054580.2	chr22_pat_hsa21	51693954	51728078	spacer-217	-	34124
Gorilla	CM054580.2	chr22_pat_hsa21	51833899	51867994	spacer-218	-	34095
Gorilla	CM054580.2	chr22_pat_hsa21	51999275	52033377	spacer-219	-	34102
Gorilla	CM054580.2	chr22_pat_hsa21	52420043	52454201	spacer-220	-	34158
Gorilla	CM054580.2	chr22_pat_hsa21	53418860	53452991	spacer-221	-	34131
Gorilla	CM054580.2	chr22_pat_hsa21	53604133	53638253	spacer-222	-	34120
Gorilla	CM054580.2	chr22_pat_hsa21	53873434	53907400	spacer-223	-	33966
Gorilla	CM054580.2	chr22_pat_hsa21	54699033	54733176	spacer-224	-	34143
Gorilla	CM054580.2	chr22_pat_hsa21	54800064	54834124	spacer-225	-	34060
Gorilla	CM054580.2	chr22_pat_hsa21	55766209	55800339	spacer-226	-	34130
Gorilla	CM054580.2	chr22_pat_hsa21	55834240	55868242	spacer-227	-	34002
Gorilla	CM054580.2	chr22_pat_hsa21	56841034	56875168	spacer-228	-	34134
Gorilla	CM054580.2	chr22_pat_hsa21	56909513	56943517	spacer-229	-	34004
Gorilla	CM054580.2	chr22_pat_hsa21	57327114	57361193	spacer-230	-	34079
Gorilla	CM054580.2	chr22_pat_hsa21	57413878	57447963	spacer-231	-	34085
Gorilla	CM054580.2	chr22_pat_hsa21	57984376	58017439	spacer-232	-	33063
Gorilla	CM054580.2	chr22_pat_hsa21	58216675	58251062	spacer-233	-	34387
Gorilla	CM054582.2	chr1_mat_hsa1	31413	65505	spacer-234	+	34092
Gorilla	CM054582.2	chr1_mat_hsa1	370925	405015	spacer-235	+	34090
Gorilla	CM054582.2	chr1_mat_hsa1	471069	505155	spacer-236	+	34086
Gorilla	CM054582.2	chr1_mat_hsa1	956732	990958	spacer-237	+	34226
Gorilla	CM054582.2	chr1_mat_hsa1	1200336	1234473	spacer-238	+	34137
Gorilla	CM054582.2	chr1_mat_hsa1	1327102	1361285	spacer-239	+	34183
Gorilla	CM054582.2	chr1_mat_hsa1	1481738	1515870	spacer-240	+	34132
Gorilla	CM054582.2	chr1_mat_hsa1	2022048	2056076	spacer-241	+	34028
Gorilla	CM054582.2	chr1_mat_hsa1	2170350	2204428	spacer-242	+	34078
Gorilla	CM054582.2	chr1_mat_hsa1	2878244	2912361	spacer-243	+	34117
Gorilla	CM054582.2	chr1_mat_hsa1	3242356	3276495	spacer-244	+	34139
Gorilla	CM054582.2	chr1_mat_hsa1	6421825	6444612	spacer-245	+	22787
Gorilla	CM054582.2	chr1_mat_hsa1	245572731	245606842	spacer-246	-	34111
Gorilla	CM054582.2	chr1_mat_hsa1	245912642	245946751	spacer-247	-	34109
Gorilla	CM054582.2	chr1_mat_hsa1	246177701	246211853	spacer-248	-	34152
Gorilla	CM054582.2	chr1_mat_hsa1	246608850	246641963	spacer-249	-	33113
Gorilla	CM054582.2	chr1_mat_hsa1	247369648	247402933	spacer-250	-	33285
Gorilla	CM054582.2	chr1_mat_hsa1	247403282	247436389	spacer-251	-	33107
Gorilla	CM054582.2	chr1_mat_hsa1	248601271	248633597	spacer-252	-	32326
Gorilla	CM054582.2	chr1_mat_hsa1	248743658	248775984	spacer-253	-	32326
Gorilla	CM054582.2	chr1_mat_hsa1	249366005	249400100	spacer-254	-	34095
Gorilla	CM054585.2	chr3_mat_hsa4	775428	809470	spacer-255	+	34042
Gorilla	CM054585.2	chr3_mat_hsa4	940636	974656	spacer-256	+	34020
Gorilla	CM054585.2	chr3_mat_hsa4	1883069	1917084	spacer-257	+	34015
Gorilla	CM054585.2	chr3_mat_hsa4	2236791	2270055	spacer-258	+	33264
Gorilla	CM054585.2	chr3_mat_hsa4	2753947	2787047	spacer-259	+	33100
Gorilla	CM054585.2	chr3_mat_hsa4	3461375	3494657	spacer-260	+	33282
Gorilla	CM054585.2	chr3_mat_hsa4	3869916	3900911	spacer-261	+	30995
Gorilla	CM054585.2	chr3_mat_hsa4	4644148	4678256	spacer-262	+	34108
Gorilla	CM054585.2	chr3_mat_hsa4	5114261	5148268	spacer-263	+	34007
Gorilla	CM054585.2	chr3_mat_hsa4	5493651	5527658	spacer-264	+	34007
Gorilla	CM054585.2	chr3_mat_hsa4	5832608	5866653	spacer-265	+	34045
Gorilla	CM054585.2	chr3_mat_hsa4	6233576	6265979	spacer-266	+	32403
Gorilla	CM054585.2	chr3_mat_hsa4	6808123	6841296	spacer-267	+	33173
Gorilla	CM054585.2	chr3_mat_hsa4	6964814	6998132	spacer-268	+	33318
Gorilla	CM054585.2	chr3_mat_hsa4	7330622	7362721	spacer-269	+	32099
Gorilla	CM054585.2	chr3_mat_hsa4	7958057	7991386	spacer-270	+	33329
Gorilla	CM054585.2	chr3_mat_hsa4	210274164	210307248	spacer-271	-	33084
Gorilla	CM054585.2	chr3_mat_hsa4	210745448	210777701	spacer-272	-	32253
Gorilla	CM054585.2	chr3_mat_hsa4	211492464	211525528	spacer-273	-	33064
Gorilla	CM054586.2	chr4_mat_hsa17x5	1628539	1662647	spacer-274	+	34108
Gorilla	CM054586.2	chr4_mat_hsa17x5	1950128	1984236	spacer-275	+	34108
Gorilla	CM054586.2	chr4_mat_hsa17x5	2251446	2285982	spacer-276	+	34536
Gorilla	CM054586.2	chr4_mat_hsa17x5	2441024	2475558	spacer-277	+	34534
Gorilla	CM054586.2	chr4_mat_hsa17x5	2855041	2889149	spacer-278	+	34108
Gorilla	CM054586.2	chr4_mat_hsa17x5	3212885	3246995	spacer-279	+	34110
Gorilla	CM054586.2	chr4_mat_hsa17x5	3557322	3591914	spacer-280	+	34592
Gorilla	CM054586.2	chr4_mat_hsa17x5	3748076	3782416	spacer-281	+	34340
Gorilla	CM054586.2	chr4_mat_hsa17x5	4300321	4334421	spacer-282	+	34100
Gorilla	CM054586.2	chr4_mat_hsa17x5	4678770	4712862	spacer-283	+	34092
Gorilla	CM054586.2	chr4_mat_hsa17x5	4940478	4974502	spacer-284	+	34024
Gorilla	CM054586.2	chr4_mat_hsa17x5	5213520	5247526	spacer-285	+	34006
Gorilla	CM054586.2	chr4_mat_hsa17x5	5411431	5445457	spacer-286	+	34026
Gorilla	CM054586.2	chr4_mat_hsa17x5	5567468	5600782	spacer-287	+	33314
Gorilla	CM054586.2	chr4_mat_hsa17x5	5855357	5889373	spacer-288	+	34016
Gorilla	CM054586.2	chr4_mat_hsa17x5	6000469	6033781	spacer-289	+	33312
Gorilla	CM054586.2	chr4_mat_hsa17x5	6058964	6092277	spacer-290	+	33313
Gorilla	CM054586.2	chr4_mat_hsa17x5	7345086	7379179	spacer-291	+	34093
Gorilla	CM054586.2	chr4_mat_hsa17x5	7488118	7522234	spacer-292	+	34116
Gorilla	CM054586.2	chr4_mat_hsa17x5	7797699	7831796	spacer-293	+	34097
Gorilla	CM054586.2	chr4_mat_hsa17x5	183916344	183939145	spacer-294	-	22801
Gorilla	CM054586.2	chr4_mat_hsa17x5	186151389	186185417	spacer-295	-	34028
Gorilla	CM054586.2	chr4_mat_hsa17x5	187031340	187064567	spacer-296	-	33227
Gorilla	CM054586.2	chr4_mat_hsa17x5	187397796	187430769	spacer-297	-	32973
Gorilla	CM054586.2	chr4_mat_hsa17x5	187431118	187464315	spacer-298	-	33197
Gorilla	CM054586.2	chr4_mat_hsa17x5	187850194	187883193	spacer-299	-	32999
Gorilla	CM054586.2	chr4_mat_hsa17x5	187883542	187916719	spacer-300	-	33177
Gorilla	CM054586.2	chr4_mat_hsa17x5	187976996	188010242	spacer-301	-	33246
Gorilla	CM054586.2	chr4_mat_hsa17x5	188692946	188725945	spacer-302	-	32999
Gorilla	CM054586.2	chr4_mat_hsa17x5	188726294	188759471	spacer-303	-	33177
Gorilla	CM054586.2	chr4_mat_hsa17x5	189284311	189317217	spacer-304	-	32906
Gorilla	CM054586.2	chr4_mat_hsa17x5	189317566	189350778	spacer-305	-	33212
Gorilla	CM054586.2	chr4_mat_hsa17x5	190184025	190217274	spacer-306	-	33249
Gorilla	CM054586.2	chr4_mat_hsa17x5	190217623	190250737	spacer-307	-	33114
Gorilla	CM054586.2	chr4_mat_hsa17x5	190646587	190678812	spacer-308	-	32225
Gorilla	CM054586.2	chr4_mat_hsa17x5	191640242	191673332	spacer-309	-	33090
Gorilla	CM054586.2	chr4_mat_hsa17x5	191986598	192019681	spacer-310	-	33083
Gorilla	CM054586.2	chr4_mat_hsa17x5	192194512	192227625	spacer-311	-	33113
Gorilla	CM054586.2	chr4_mat_hsa17x5	192697576	192731583	spacer-312	-	34007
Gorilla	CM054586.2	chr4_mat_hsa17x5	193424008	193458115	spacer-313	-	34107
Gorilla	CM054589.2	chr7_mat_hsa8	1294730	1328840	spacer-314	+	34110
[truncated: 1,085 more rows]

## Sheet: 4
Summary of Iso-Seq mapping	Gorilla	Chimpanzee	Bonobo	Notes
Total Iso-Seq reads at the subterminal regions and +/-2 Mbp flanking	2084539	2291277	1801406
Mapping within pCht	759	1236	1228
Collapsed transcript in pCht	363	614	524
Filter (1) in pCht	1	3	6	Supported by at least 5 Iso-Seq reads
Filter (2) in pCht	1	1	4	Supported by at least 5 Iso-Seq reads & Contain multi-exonic gene model (>=2 exons)
Filter (3) in pCht	0	0	0	Supported by at least 10 Iso-Seq reads & contain multi-exonic gene model (>=3 exons) & >80% of gene model falls within pCht
Mapping within spacer SD	7981	5081	12058
Collapsed transcript in spacer SD	3916	979	2452
Filter (1) in spacer SD	268	20	257	Supported by at least 5 Iso-Seq reads
Filter (2) in spacer SD	16	1	18	Supported by at least 5 Iso-Seq reads & Contain multi-exonic gene model (>=2 exons)
Filter (3) in spacer SD	0	0	0	Supported by at least 10 Iso-Seq reads & contain multi-exonic gene model (>=3 exons) & >80% of gene model falls within spacer

## Sheet: 5
Species	Chromosome	Chromosome number	Start	End	Collapsed Iso-Seq model	Strand	Region	Number of Iso-Seq reads	Number of exons
Chimpanzee	CM054443.2	chr9_hap1_hsa11	231140	233167	Collapse T-1	+	pCht	2	1
Chimpanzee	CM054443.2	chr9_hap1_hsa11	236258	252292	Collapse T-2	+	pCht	1	2
Chimpanzee	CM054443.2	chr9_hap1_hsa11	1505619	1506074	Collapse T-3	+	pCht	1	1
Chimpanzee	CM054443.2	chr9_hap1_hsa11	2036750	2149972	Collapse T-4	+	pCht	1	3
Chimpanzee	CM068905.1	chr2_hap1_hsa3	290971	291171	Collapse T-5	-	pCht	1	1
Chimpanzee	CM054444.2	chr10_hap1_hsa12	554895	563508	Collapse T-6	-	pCht	1	2
Chimpanzee	CM054444.2	chr10_hap1_hsa12	896786	897041	Collapse T-7	-	pCht	1	1
Chimpanzee	CM054444.2	chr10_hap1_hsa12	1584685	1585514	Collapse T-8	-	pCht	1	1
Chimpanzee	CM054444.2	chr10_hap1_hsa12	6070364	6073966	Collapse T-9	+	pCht	1	1
Chimpanzee	CM054444.2	chr10_hap1_hsa12	7065028	7094821	Collapse T-10	-	pCht	1	5
Chimpanzee	CM054444.2	chr10_hap1_hsa12	7065028	7094856	Collapse T-11	-	pCht	1	5
Chimpanzee	CM068905.1	chr2_hap1_hsa3	1552347	1554647	Collapse T-12	+	pCht	1	1
Chimpanzee	CM054445.2	chr11_hap1_hsa9	116905195	116907929	Collapse T-13	+	pCht	1	1
Chimpanzee	CM054446.2	chr12_hap1_hsa2a	174356	297026	Collapse T-14	+	pCht	2	2
Chimpanzee	CM054446.2	chr12_hap1_hsa2a	882637	884033	Collapse T-15	+	pCht	1	1
Chimpanzee	CM054446.2	chr12_hap1_hsa2a	3131014	3136633	Collapse T-16	-	pCht	1	2
Chimpanzee	CM054446.2	chr12_hap1_hsa2a	3468573	3469954	Collapse T-17	+	pCht	1	2
Chimpanzee	CM054446.2	chr12_hap1_hsa2a	3354786	3355140	Collapse T-18	-	pCht	1	1
Chimpanzee	CM054446.2	chr12_hap1_hsa2a	5231675	5232693	Collapse T-19	-	pCht	1	2
Chimpanzee	CM054446.2	chr12_hap1_hsa2a	5301482	5305546	Collapse T-20	+	pCht	1	2
Chimpanzee	CM054446.2	chr12_hap1_hsa2a	8139128	8340739	Collapse T-21	-	pCht	1	3
Chimpanzee	CM054446.2	chr12_hap1_hsa2a	8483942	8533459	Collapse T-22	-	pCht	1	5
Chimpanzee	CM054446.2	chr12_hap1_hsa2a	8343292	8344975	Collapse T-23	+	pCht	1	2
Chimpanzee	CM054446.2	chr12_hap1_hsa2a	8795370	8796348	Collapse T-24	+	pCht	1	1
Chimpanzee	CM054447.2	chr13_hap1_hsa2b	1716404	1845361	Collapse T-25	+	pCht	1	3
Chimpanzee	CM054447.2	chr13_hap1_hsa2b	1844019	1845361	Collapse T-26	+	pCht	1	1
Chimpanzee	CM054447.2	chr13_hap1_hsa2b	2436248	2437078	Collapse T-27	-	pCht	1	2
Chimpanzee	CM054447.2	chr13_hap1_hsa2b	2676512	2677088	Collapse T-28	-	pCht	1	1
Chimpanzee	CM054447.2	chr13_hap1_hsa2b	2916229	2917245	Collapse T-29	+	pCht	1	1
Chimpanzee	CM054447.2	chr13_hap1_hsa2b	3404875	3412078	Collapse T-30	+	pCht	1	2
Chimpanzee	CM054447.2	chr13_hap1_hsa2b	3736724	3737080	Collapse T-31	+	pCht	1	1
Chimpanzee	CM054447.2	chr13_hap1_hsa2b	7109328	7112226	Collapse T-32	+	pCht	1	1
Chimpanzee	CM054447.2	chr13_hap1_hsa2b	7193094	7195472	Collapse T-33	+	pCht	1	2
Chimpanzee	CM054447.2	chr13_hap1_hsa2b	7034287	7229297	Collapse T-34	-	pCht	1	2
Chimpanzee	CM054447.2	chr13_hap1_hsa2b	8042425	8043861	Collapse T-35	+	pCht	1	1
Chimpanzee	CM054447.2	chr13_hap1_hsa2b	8947676	9054880	Collapse T-36	-	pCht	1	2
Chimpanzee	CM054447.2	chr13_hap1_hsa2b	11158969	11160727	Collapse T-37	+	pCht	1	1
Chimpanzee	CM054447.2	chr13_hap1_hsa2b	11313889	11315259	Collapse T-38	+	pCht	1	2
Chimpanzee	CM054447.2	chr13_hap1_hsa2b	11757079	11757465	Collapse T-39	+	pCht	1	1
Chimpanzee	CM054447.2	chr13_hap1_hsa2b	13227076	13228779	Collapse T-40	+	pCht	1	1
Chimpanzee	CM054447.2	chr13_hap1_hsa2b	13241990	13247272	Collapse T-41	-	pCht	1	2
Chimpanzee	CM054447.2	chr13_hap1_hsa2b	13695788	13777765	Collapse T-42	+	pCht	1	5
Chimpanzee	CM054447.2	chr13_hap1_hsa2b	14039665	14058181	Collapse T-43	+	pCht	1	2
Chimpanzee	CM054447.2	chr13_hap1_hsa2b	14056905	14058181	Collapse T-44	+	pCht	1	1
Chimpanzee	CM068905.1	chr2_hap1_hsa3	3109625	3197999	Collapse T-45	-	pCht	1	2
Chimpanzee	CM054439.2	chr5_hap1_hsa6	3779384	3970813	Collapse T-46	+	pCht	1	3
Chimpanzee	CM054448.2	chr14_hap1_hsa13	45628870	45632316	Collapse T-47	+	pCht	1	1
Chimpanzee	CM054448.2	chr14_hap1_hsa13	45669448	45671051	Collapse T-48	+	pCht	1	1
Chimpanzee	CM054448.2	chr14_hap1_hsa13	45673354	45675956	Collapse T-49	+	pCht	1	1
Chimpanzee	CM054448.2	chr14_hap1_hsa13	46870910	46872493	Collapse T-50	+	pCht	1	1
Chimpanzee	CM054448.2	chr14_hap1_hsa13	46945594	46950120	Collapse T-51	+	pCht	1	1
Chimpanzee	CM054448.2	chr14_hap1_hsa13	47958577	47995940	Collapse T-52	+	pCht	1	2
Chimpanzee	CM054448.2	chr14_hap1_hsa13	49495224	49495853	Collapse T-53	-	pCht	1	1
Chimpanzee	CM054448.2	chr14_hap1_hsa13	50652494	50653000	Collapse T-54	-	pCht	1	1
Chimpanzee	CM068905.1	chr2_hap1_hsa3	3225243	3225682	Collapse T-55	-	pCht	1	1
Chimpanzee	CM054449.2	chr15_hap1_hsa14	13983620	13984859	Collapse T-56	-	pCht	1	1
Chimpanzee	CM054450.2	chr16_hap1_hsa15	255741	258195	Collapse T-57	+	pCht	1	2
Chimpanzee	CM054450.2	chr16_hap1_hsa15	1538076	1540582	Collapse T-58	+	pCht	1	2
Chimpanzee	CM054450.2	chr16_hap1_hsa15	2063077	2191795	Collapse T-59	+	pCht	1	4
Chimpanzee	CM054450.2	chr16_hap1_hsa15	3796406	3798632	Collapse T-60	+	pCht	1	1
Chimpanzee	CM054450.2	chr16_hap1_hsa15	3841184	3841562	Collapse T-61	-	pCht	1	2
Chimpanzee	CM054450.2	chr16_hap1_hsa15	5055769	5056599	Collapse T-62	-	pCht	1	1
Chimpanzee	CM054452.2	chr18_hap1_hsa16	1805358	1809281	Collapse T-63	+	pCht	1	2
Chimpanzee	CM054452.2	chr18_hap1_hsa16	2205807	2209960	Collapse T-64	+	pCht	1	1
Chimpanzee	CM054452.2	chr18_hap1_hsa16	88578276	88579343	Collapse T-65	+	pCht	1	1
Chimpanzee	CM054452.2	chr18_hap1_hsa16	88934113	88936621	Collapse T-66	-	pCht	1	2
Chimpanzee	CM054452.2	chr18_hap1_hsa16	90985590	90986582	Collapse T-67	-	pCht	1	1
Chimpanzee	CM054452.2	chr18_hap1_hsa16	91048425	91049417	Collapse T-68	-	pCht	1	1
Chimpanzee	CM054452.2	chr18_hap1_hsa16	91181739	91183159	Collapse T-69	-	pCht	1	1
Chimpanzee	CM054452.2	chr18_hap1_hsa16	91221693	91222237	Collapse T-70	+	pCht	1	1
Chimpanzee	CM054453.2	chr19_hap1_hsa17	3265875	3267021	Collapse T-71	+	pCht	1	2
Chimpanzee	CM054453.2	chr19_hap1_hsa17	3649086	3675109	Collapse T-72	-	pCht	1	4
Chimpanzee	CM054453.2	chr19_hap1_hsa17	5328529	5328792	Collapse T-73	-	pCht	1	1
Chimpanzee	CM054440.2	chr6_hap1_hsa7	497886	498874	Collapse T-74	+	pCht	1	1
Chimpanzee	CM054440.2	chr6_hap1_hsa7	508281	508739	Collapse T-75	-	pCht	1	1
Chimpanzee	CM054453.2	chr19_hap1_hsa17	8254341	8255028	Collapse T-76	-	pCht	1	1
Chimpanzee	CM054453.2	chr19_hap1_hsa17	9291361	9291564	Collapse T-77	+	pCht	1	1
Chimpanzee	CM054453.2	chr19_hap1_hsa17	9891603	9892688	Collapse T-78	-	pCht	1	2
Chimpanzee	CM054453.2	chr19_hap1_hsa17	10217256	10217768	Collapse T-79	-	pCht	1	2
Chimpanzee	CM054440.2	chr6_hap1_hsa7	1411768	1487011	Collapse T-80	-	pCht	1	3
Chimpanzee	CM054440.2	chr6_hap1_hsa7	4083628	4083828	Collapse T-81	+	pCht	1	1
Chimpanzee	CM054440.2	chr6_hap1_hsa7	4435738	4436256	Collapse T-82	-	pCht	1	1
Chimpanzee	CM054440.2	chr6_hap1_hsa7	5567568	5568067	Collapse T-83	-	pCht	1	1
Chimpanzee	CM054440.2	chr6_hap1_hsa7	4591391	4722599	Collapse T-84	+	pCht	1	3
Chimpanzee	CM054453.2	chr19_hap1_hsa17	98617934	98640866	Collapse T-85	+	pCht	1	3
Chimpanzee	CM054453.2	chr19_hap1_hsa17	98957542	98958193	Collapse T-86	-	pCht	1	1
Chimpanzee	CM054453.2	chr19_hap1_hsa17	99136710	99137021	Collapse T-87	-	pCht	1	1
Chimpanzee	CM054453.2	chr19_hap1_hsa17	99138986	99139813	Collapse T-88	+	pCht	1	2
Chimpanzee	CM054453.2	chr19_hap1_hsa17	99289573	99290223	Collapse T-89	-	pCht	1	1
Chimpanzee	CM054454.2	chr20_hap1_hsa19	1840276	1841288	Collapse T-90	+	pCht	1	1
Chimpanzee	CM054454.2	chr20_hap1_hsa19	61636748	61662951	Collapse T-91	-	pCht	1	4
Chimpanzee	CM054454.2	chr20_hap1_hsa19	63920303	64145658	Collapse T-92	-	pCht	1	3
Chimpanzee	CM054454.2	chr20_hap1_hsa19	65590276	65793481	Collapse T-93	+	pCht	1	2
Chimpanzee	CM054454.2	chr20_hap1_hsa19	66904903	67016342	Collapse T-94	+	pCht	2	2
Chimpanzee	CM054455.2	chr21_hap1_hsa20	650536	651668	Collapse T-95	+	pCht	1	1
Chimpanzee	CM054455.2	chr21_hap1_hsa20	1450386	1450991	Collapse T-96	-	pCht	2	1
Chimpanzee	CM054455.2	chr21_hap1_hsa20	1616021	1920068	Collapse T-97	+	pCht	2	4
Chimpanzee	CM054455.2	chr21_hap1_hsa20	2525745	2526514	Collapse T-98	-	pCht	1	1
Chimpanzee	CM054455.2	chr21_hap1_hsa20	5289561	5292140	Collapse T-99	+	pCht	1	3
Chimpanzee	CM054455.2	chr21_hap1_hsa20	6773880	6777126	Collapse T-100	-	pCht	5	1
Chimpanzee	CM054455.2	chr21_hap1_hsa20	6774035	6780273	Collapse T-101	-	pCht	6	2
Chimpanzee	CM054455.2	chr21_hap1_hsa20	6774044	6777898	Collapse T-102	-	pCht	10	1
Chimpanzee	CM054455.2	chr21_hap1_hsa20	6777914	6780206	Collapse T-103	-	pCht	1	1
Chimpanzee	CM054455.2	chr21_hap1_hsa20	74970188	75022951	Collapse T-104	-	pCht	1	4
Chimpanzee	CM054456.2	chr22_hap1_hsa21	48612245	48612839	Collapse T-105	-	pCht	1	1
Chimpanzee	CM054456.2	chr22_hap1_hsa21	49478677	49479367	Collapse T-106	-	pCht	1	1
Chimpanzee	CM054456.2	chr22_hap1_hsa21	49743671	50001397	Collapse T-107	-	pCht	2	6
Chimpanzee	CM054456.2	chr22_hap1_hsa21	50008280	50051128	Collapse T-108	+	pCht	1	4
Chimpanzee	CM054456.2	chr22_hap1_hsa21	51085888	51090727	Collapse T-109	+	pCht	1	3
Chimpanzee	CM054456.2	chr22_hap1_hsa21	51086053	51086728	Collapse T-110	-	pCht	1	2
Chimpanzee	CM068906.1	chr23_hap1_hsa22	56739702	56739962	Collapse T-111	+	pCht	1	1
Chimpanzee	CM068906.1	chr23_hap1_hsa22	59054241	59057508	Collapse T-112	-	pCht	1	2
Chimpanzee	CM054457.2	chrX_hap1_hsaX	459105	485827	Collapse T-113	-	pCht	1	5
Chimpanzee	CM054457.2	chrX_hap1_hsaX	543878	549484	Collapse T-114	-	pCht	1	2
Chimpanzee	CM054457.2	chrX_hap1_hsaX	545039	582967	Collapse T-115	-	pCht	1	4
Chimpanzee	CM054457.2	chrX_hap1_hsaX	558572	583084	Collapse T-116	-	pCht	1	2
Chimpanzee	CM054458.2	chrY_hap2_hsaY	36117573	36173910	Collapse T-117	+	pCht	1	5
Chimpanzee	CM054458.2	chrY_hap2_hsaY	36390195	36435946	Collapse T-118	+	pCht	1	4
Chimpanzee	CM054440.2	chr6_hap1_hsa7	112189273	112191609	Collapse T-119	+	pCht	1	1
Chimpanzee	CM054440.2	chr6_hap1_hsa7	113920559	113942672	Collapse T-120	-	pCht	1	3
Chimpanzee	CM054440.2	chr6_hap1_hsa7	114084066	114258006	Collapse T-121	+	pCht	1	2
Chimpanzee	CM054440.2	chr6_hap1_hsa7	115062161	115069441	Collapse T-122	+	pCht	1	2
Chimpanzee	CM054440.2	chr6_hap1_hsa7	117169117	117170116	Collapse T-123	+	pCht	1	1
Chimpanzee	CM054441.2	chr7_hap1_hsa8	1174455	1179610	Collapse T-124	+	pCht	1	3
Chimpanzee	CM054441.2	chr7_hap1_hsa8	1192047	1193140	Collapse T-125	+	pCht	1	1
Chimpanzee	CM054441.2	chr7_hap1_hsa8	1523370	1524727	Collapse T-126	+	pCht	2	1
Chimpanzee	CM054441.2	chr7_hap1_hsa8	6156778	6371763	Collapse T-127	+	pCht	1	2
Chimpanzee	CM054442.2	chr8_hap1_hsa10	963086	963842	Collapse T-128	+	pCht	1	1
Chimpanzee	CM054442.2	chr8_hap1_hsa10	1117553	1119425	Collapse T-129	+	pCht	1	2
Chimpanzee	CM054442.2	chr8_hap1_hsa10	1624762	1634038	Collapse T-130	+	pCht	1	2
Chimpanzee	CM054442.2	chr8_hap1_hsa10	2322971	2323418	Collapse T-131	-	pCht	1	2
Chimpanzee	CM054442.2	chr8_hap1_hsa10	2078251	2080195	Collapse T-132	+	pCht	2	1
Chimpanzee	CM054442.2	chr8_hap1_hsa10	3205197	3304473	Collapse T-133	+	pCht	1	7
Chimpanzee	CM054442.2	chr8_hap1_hsa10	2961198	2961900	Collapse T-134	-	pCht	1	1
Chimpanzee	CM054442.2	chr8_hap1_hsa10	4734196	4735377	Collapse T-135	+	pCht	1	1
Chimpanzee	CM054442.2	chr8_hap1_hsa10	5491171	5496733	Collapse T-136	+	pCht	1	2
Chimpanzee	CM054442.2	chr8_hap1_hsa10	7478166	7479220	Collapse T-137	-	pCht	1	2
Chimpanzee	CM054442.2	chr8_hap1_hsa10	7527030	7586233	Collapse T-138	-	pCht	1	2
Chimpanzee	CM054442.2	chr8_hap1_hsa10	11191835	11192404	Collapse T-139	-	pCht	1	1
Chimpanzee	CM054442.2	chr8_hap1_hsa10	11882073	12122383	Collapse T-140	+	pCht	1	4
Chimpanzee	CM054443.2	chr9_hap1_hsa11	96373	96484	Collapse T-141	+	spacer	1	1
Chimpanzee	CM054443.2	chr9_hap1_hsa11	1317151	1317271	Collapse T-142	+	spacer	1	1
Chimpanzee	CM054443.2	chr9_hap1_hsa11	1842298	1845318	Collapse T-143	-	spacer	4	1
Chimpanzee	CM054443.2	chr9_hap1_hsa11	1843535	1843735	Collapse T-144	-	spacer	1	1
Chimpanzee	CM054443.2	chr9_hap1_hsa11	1834750	1835690	Collapse T-145	+	spacer	1	1
Chimpanzee	CM054443.2	chr9_hap1_hsa11	1849934	1851342	Collapse T-146	-	spacer	1	1
Chimpanzee	CM054443.2	chr9_hap1_hsa11	2268382	2271049	Collapse T-147	-	spacer	1	1
Chimpanzee	CM054443.2	chr9_hap1_hsa11	2695627	2698670	Collapse T-148	-	spacer	2	1
Chimpanzee	CM054443.2	chr9_hap1_hsa11	2705981	2708988	Collapse T-149	-	spacer	1	1
Chimpanzee	CM054443.2	chr9_hap1_hsa11	2858454	2858616	Collapse T-150	-	spacer	1	1
Chimpanzee	CM054443.2	chr9_hap1_hsa11	3684758	3685026	Collapse T-151	+	spacer	1	1
Chimpanzee	CM054443.2	chr9_hap1_hsa11	3692883	3693498	Collapse T-152	-	spacer	1	1
Chimpanzee	CM054443.2	chr9_hap1_hsa11	3902502	3903727	Collapse T-153	-	spacer	2	1
Chimpanzee	CM054443.2	chr9_hap1_hsa11	3907075	3907233	Collapse T-154	-	spacer	1	1
Chimpanzee	CM054443.2	chr9_hap1_hsa11	3894323	3894639	Collapse T-155	+	spacer	1	1
Chimpanzee	CM054443.2	chr9_hap1_hsa11	3914785	3915280	Collapse T-156	-	spacer	1	1
Chimpanzee	CM054443.2	chr9_hap1_hsa11	4155830	4157113	Collapse T-157	-	spacer	1	1
Chimpanzee	CM054443.2	chr9_hap1_hsa11	4151775	4153108	Collapse T-158	+	spacer	1	1
Chimpanzee	CM054443.2	chr9_hap1_hsa11	4165446	4167444	Collapse T-159	-	spacer	4	1
Chimpanzee	CM054443.2	chr9_hap1_hsa11	4177441	4178127	Collapse T-160	+	spacer	1	1
Chimpanzee	CM054444.2	chr10_hap1_hsa12	95122	95340	Collapse T-161	-	spacer	1	1
Chimpanzee	CM054444.2	chr10_hap1_hsa12	96362	96512	Collapse T-162	-	spacer	1	1
Chimpanzee	CM054444.2	chr10_hap1_hsa12	110987	112013	Collapse T-163	+	spacer	1	1
Chimpanzee	CM054444.2	chr10_hap1_hsa12	874752	875164	Collapse T-164	-	spacer	1	1
Chimpanzee	CM054444.2	chr10_hap1_hsa12	862083	862351	Collapse T-165	+	spacer	1	1
Chimpanzee	CM054444.2	chr10_hap1_hsa12	888835	889208	Collapse T-166	+	spacer	1	1
Chimpanzee	CM054444.2	chr10_hap1_hsa12	1113885	1114193	Collapse T-167	+	spacer	1	1
Chimpanzee	CM054444.2	chr10_hap1_hsa12	1112772	1113886	Collapse T-168	-	spacer	1	1
Chimpanzee	CM054444.2	chr10_hap1_hsa12	1116024	1116517	Collapse T-169	+	spacer	1	1
Chimpanzee	CM054444.2	chr10_hap1_hsa12	1981419	1981781	Collapse T-170	+	spacer	2	1
Chimpanzee	CM054444.2	chr10_hap1_hsa12	2882631	2883113	Collapse T-171	-	spacer	1	1
Chimpanzee	CM054444.2	chr10_hap1_hsa12	3948566	3951105	Collapse T-172	-	spacer	1	1
Chimpanzee	CM054444.2	chr10_hap1_hsa12	3596485	3598163	Collapse T-173	+	spacer	1	1
Chimpanzee	CM054444.2	chr10_hap1_hsa12	3976649	3977325	Collapse T-174	+	spacer	1	1
Chimpanzee	CM054444.2	chr10_hap1_hsa12	3958931	3959054	Collapse T-175	-	spacer	1	1
Chimpanzee	CM054444.2	chr10_hap1_hsa12	4024613	4024695	Collapse T-176	-	spacer	1	1
Chimpanzee	CM054444.2	chr10_hap1_hsa12	4030377	4030579	Collapse T-177	-	spacer	1	1
Chimpanzee	CM054444.2	chr10_hap1_hsa12	4163606	4163778	Collapse T-178	+	spacer	1	1
Chimpanzee	CM054444.2	chr10_hap1_hsa12	4181944	4182148	Collapse T-179	-	spacer	1	1
Chimpanzee	CM054444.2	chr10_hap1_hsa12	4832079	4832199	Collapse T-180	+	spacer	1	1
Chimpanzee	CM054444.2	chr10_hap1_hsa12	6756721	6759684	Collapse T-181	+	spacer	1	1
Chimpanzee	CM054444.2	chr10_hap1_hsa12	4850392	4851162	Collapse T-182	-	spacer	1	1
Chimpanzee	CM054444.2	chr10_hap1_hsa12	6854055	6857411	Collapse T-183	-	spacer	1	1
Chimpanzee	CM054444.2	chr10_hap1_hsa12	6760087	6760202	Collapse T-184	+	spacer	1	1
Chimpanzee	CM068905.1	chr2_hap1_hsa3	773929	774083	Collapse T-185	+	spacer	1	1
Chimpanzee	CM054445.2	chr11_hap1_hsa9	116702929	116703650	Collapse T-186	+	spacer	1	1
Chimpanzee	CM054445.2	chr11_hap1_hsa9	118004588	118004691	Collapse T-187	-	spacer	1	1
Chimpanzee	CM054445.2	chr11_hap1_hsa9	118000366	118002556	Collapse T-188	+	spacer	1	1
Chimpanzee	CM054445.2	chr11_hap1_hsa9	118001676	118002812	Collapse T-189	+	spacer	1	1
Chimpanzee	CM054445.2	chr11_hap1_hsa9	118779443	118779599	Collapse T-190	+	spacer	1	1
Chimpanzee	CM054445.2	chr11_hap1_hsa9	118775855	118776198	Collapse T-191	-	spacer	1	1
Chimpanzee	CM054446.2	chr12_hap1_hsa2a	75016	75117	Collapse T-192	+	spacer	1	1
Chimpanzee	CM054446.2	chr12_hap1_hsa2a	553132	553348	Collapse T-193	+	spacer	1	1
Chimpanzee	CM054446.2	chr12_hap1_hsa2a	564703	565049	Collapse T-194	+	spacer	1	1
Chimpanzee	CM054446.2	chr12_hap1_hsa2a	832891	833236	Collapse T-195	+	spacer	1	1
Chimpanzee	CM054446.2	chr12_hap1_hsa2a	1553453	1553795	Collapse T-196	+	spacer	1	1
Chimpanzee	CM054446.2	chr12_hap1_hsa2a	1578141	1578827	Collapse T-197	+	spacer	1	1
Chimpanzee	CM054446.2	chr12_hap1_hsa2a	2438265	2438542	Collapse T-198	-	spacer	1	1
Chimpanzee	CM054446.2	chr12_hap1_hsa2a	3625953	3626420	Collapse T-199	-	spacer	1	1
Chimpanzee	CM054446.2	chr12_hap1_hsa2a	3628938	3629090	Collapse T-200	-	spacer	1	1
Chimpanzee	CM054446.2	chr12_hap1_hsa2a	3613461	3613562	Collapse T-201	+	spacer	1	1
Chimpanzee	CM054446.2	chr12_hap1_hsa2a	4509439	4510137	Collapse T-202	+	spacer	1	1
Chimpanzee	CM054446.2	chr12_hap1_hsa2a	3894909	3894994	Collapse T-203	-	spacer	1	1
Chimpanzee	CM054446.2	chr12_hap1_hsa2a	4590794	4590920	Collapse T-204	-	spacer	2	1
Chimpanzee	CM054446.2	chr12_hap1_hsa2a	4604016	4605386	Collapse T-205	-	spacer	4	1
Chimpanzee	CM054446.2	chr12_hap1_hsa2a	4510199	4510408	Collapse T-206	+	spacer	1	1
Chimpanzee	CM054446.2	chr12_hap1_hsa2a	5733861	5734018	Collapse T-207	-	spacer	1	1
Chimpanzee	CM054446.2	chr12_hap1_hsa2a	6005202	6005539	Collapse T-208	+	spacer	1	1
Chimpanzee	CM054446.2	chr12_hap1_hsa2a	7546089	7546500	Collapse T-209	+	spacer	1	1
Chimpanzee	CM054446.2	chr12_hap1_hsa2a	7014274	7014416	Collapse T-210	-	spacer	1	1
Chimpanzee	CM054446.2	chr12_hap1_hsa2a	7640300	7640958	Collapse T-211	+	spacer	1	1
Chimpanzee	CM054446.2	chr12_hap1_hsa2a	8964369	8966193	Collapse T-212	+	spacer	3	1
Chimpanzee	CM054446.2	chr12_hap1_hsa2a	8624993	8625189	Collapse T-213	-	spacer	1	1
Chimpanzee	CM054446.2	chr12_hap1_hsa2a	9112024	9112679	Collapse T-214	+	spacer	2	1
Chimpanzee	CM054446.2	chr12_hap1_hsa2a	9119294	9120075	Collapse T-215	-	spacer	1	1
Chimpanzee	CM054446.2	chr12_hap1_hsa2a	9616661	9616978	Collapse T-216	-	spacer	1	1
Chimpanzee	CM054446.2	chr12_hap1_hsa2a	9628859	9628955	Collapse T-217	-	spacer	1	1
Chimpanzee	CM054446.2	chr12_hap1_hsa2a	9137067	9137876	Collapse T-218	+	spacer	1	1
Chimpanzee	CM054447.2	chr13_hap1_hsa2b	1382094	1382607	Collapse T-219	-	spacer	1	1
Chimpanzee	CM054447.2	chr13_hap1_hsa2b	854878	855411	Collapse T-220	+	spacer	1	1
Chimpanzee	CM054447.2	chr13_hap1_hsa2b	1386606	1386868	Collapse T-221	-	spacer	1	1
Chimpanzee	CM054447.2	chr13_hap1_hsa2b	1510177	1511440	Collapse T-222	-	spacer	1	1
Chimpanzee	CM054447.2	chr13_hap1_hsa2b	1992956	1993444	Collapse T-223	-	spacer	1	1
Chimpanzee	CM054447.2	chr13_hap1_hsa2b	2138802	2139170	Collapse T-224	+	spacer	1	1
Chimpanzee	CM054447.2	chr13_hap1_hsa2b	2816985	2818585	Collapse T-225	-	spacer	1	1
Chimpanzee	CM054447.2	chr13_hap1_hsa2b	3042752	3042997	Collapse T-226	+	spacer	1	1
Chimpanzee	CM054447.2	chr13_hap1_hsa2b	3061467	3061618	Collapse T-227	-	spacer	1	1
Chimpanzee	CM054447.2	chr13_hap1_hsa2b	4191698	4191802	Collapse T-228	+	spacer	1	1
Chimpanzee	CM054447.2	chr13_hap1_hsa2b	4241190	4243193	Collapse T-229	+	spacer	1	1
Chimpanzee	CM054447.2	chr13_hap1_hsa2b	4694123	4695611	Collapse T-230	+	spacer	1	1
Chimpanzee	CM054447.2	chr13_hap1_hsa2b	4718943	4719114	Collapse T-231	+	spacer	1	1
Chimpanzee	CM054447.2	chr13_hap1_hsa2b	4993728	4993862	Collapse T-232	+	spacer	2	1
Chimpanzee	CM054447.2	chr13_hap1_hsa2b	3430515	3430813	Collapse T-233	-	spacer	1	1
Chimpanzee	CM054447.2	chr13_hap1_hsa2b	6264129	6265930	Collapse T-234	-	spacer	1	1
Chimpanzee	CM054447.2	chr13_hap1_hsa2b	6647403	6647662	Collapse T-235	-	spacer	1	1
Chimpanzee	CM054447.2	chr13_hap1_hsa2b	6660734	6665917	Collapse T-236	-	spacer	1	2
Chimpanzee	CM054447.2	chr13_hap1_hsa2b	7447212	7447913	Collapse T-237	+	spacer	1	1
Chimpanzee	CM054447.2	chr13_hap1_hsa2b	7037080	7037232	Collapse T-238	-	spacer	1	1
Chimpanzee	CM054447.2	chr13_hap1_hsa2b	7226324	7227612	Collapse T-239	-	spacer	3	1
Chimpanzee	CM054447.2	chr13_hap1_hsa2b	7447966	7448433	Collapse T-240	+	spacer	1	1
Chimpanzee	CM054447.2	chr13_hap1_hsa2b	7775296	7775467	Collapse T-241	-	spacer	1	1
Chimpanzee	CM054447.2	chr13_hap1_hsa2b	8459661	8459789	Collapse T-242	+	spacer	1	1
Chimpanzee	CM054447.2	chr13_hap1_hsa2b	8560281	8561733	Collapse T-243	-	spacer	2	1
Chimpanzee	CM054447.2	chr13_hap1_hsa2b	8574068	8574734	Collapse T-244	+	spacer	1	1
Chimpanzee	CM068905.1	chr2_hap1_hsa3	2267773	2268657	Collapse T-245	-	spacer	1	1
Chimpanzee	CM054447.2	chr13_hap1_hsa2b	9668687	9669130	Collapse T-246	+	spacer	2	1
Chimpanzee	CM054447.2	chr13_hap1_hsa2b	9675756	9677208	Collapse T-247	-	spacer	1	1
Chimpanzee	CM054447.2	chr13_hap1_hsa2b	10265127	10266931	Collapse T-248	-	spacer	2	1
Chimpanzee	CM054447.2	chr13_hap1_hsa2b	10270852	10271205	Collapse T-249	-	spacer	1	1
Chimpanzee	CM054447.2	chr13_hap1_hsa2b	10255885	10259007	Collapse T-250	+	spacer	1	1
Chimpanzee	CM054447.2	chr13_hap1_hsa2b	10256278	10258494	Collapse T-251	+	spacer	4	1
Chimpanzee	CM054447.2	chr13_hap1_hsa2b	10381614	10382762	Collapse T-252	-	spacer	1	1
Chimpanzee	CM054447.2	chr13_hap1_hsa2b	10651773	10651902	Collapse T-253	+	spacer	1	1
Chimpanzee	CM054447.2	chr13_hap1_hsa2b	10671734	10672025	Collapse T-254	-	spacer	1	1
Chimpanzee	CM054447.2	chr13_hap1_hsa2b	11320219	11321034	Collapse T-255	+	spacer	1	1
Chimpanzee	CM054447.2	chr13_hap1_hsa2b	11437992	11438092	Collapse T-256	+	spacer	1	1
Chimpanzee	CM054447.2	chr13_hap1_hsa2b	11433007	11433921	Collapse T-257	-	spacer	1	1
Chimpanzee	CM054447.2	chr13_hap1_hsa2b	11433659	11433843	Collapse T-258	-	spacer	1	1
Chimpanzee	CM054447.2	chr13_hap1_hsa2b	11884910	11886017	Collapse T-259	-	spacer	1	1
Chimpanzee	CM054447.2	chr13_hap1_hsa2b	11996962	11997490	Collapse T-260	+	spacer	1	1
Chimpanzee	CM054447.2	chr13_hap1_hsa2b	12843098	12843614	Collapse T-261	+	spacer	1	1
Chimpanzee	CM054447.2	chr13_hap1_hsa2b	11898099	11898753	Collapse T-262	-	spacer	1	1
Chimpanzee	CM054447.2	chr13_hap1_hsa2b	13309463	13309797	Collapse T-263	+	spacer	1	1
Chimpanzee	CM054447.2	chr13_hap1_hsa2b	13331184	13333886	Collapse T-264	-	spacer	1	1
Chimpanzee	CM054447.2	chr13_hap1_hsa2b	13826097	13826466	Collapse T-265	+	spacer	1	1
Chimpanzee	CM054447.2	chr13_hap1_hsa2b	14061741	14063960	Collapse T-266	+	spacer	2	1
Chimpanzee	CM054447.2	chr13_hap1_hsa2b	13833086	13834562	Collapse T-267	-	spacer	1	1
Chimpanzee	CM054447.2	chr13_hap1_hsa2b	14083707	14086017	Collapse T-268	-	spacer	1	1
Chimpanzee	CM054447.2	chr13_hap1_hsa2b	14067356	14067450	Collapse T-269	+	spacer	1	1
Chimpanzee	CM068905.1	chr2_hap1_hsa3	2272650	2272824	Collapse T-270	-	spacer	2	1
Chimpanzee	CM054439.2	chr5_hap1_hsa6	98322	104336	Collapse T-271	-	spacer	1	2
Chimpanzee	CM054439.2	chr5_hap1_hsa6	525161	525437	Collapse T-272	+	spacer	1	1
Chimpanzee	CM054439.2	chr5_hap1_hsa6	730118	730554	Collapse T-273	+	spacer	1	1
Chimpanzee	CM054439.2	chr5_hap1_hsa6	1097647	1097735	Collapse T-274	+	spacer	1	1
Chimpanzee	CM054439.2	chr5_hap1_hsa6	409383	410250	Collapse T-275	-	spacer	1	1
Chimpanzee	CM054439.2	chr5_hap1_hsa6	1111364	1112124	Collapse T-276	-	spacer	1	1
Chimpanzee	CM054439.2	chr5_hap1_hsa6	1103085	1103511	Collapse T-277	+	spacer	1	1
Chimpanzee	CM054439.2	chr5_hap1_hsa6	1284038	1284390	Collapse T-278	-	spacer	1	1
Chimpanzee	CM054439.2	chr5_hap1_hsa6	1293099	1294146	Collapse T-279	-	spacer	1	1
Chimpanzee	CM054439.2	chr5_hap1_hsa6	1287553	1288928	Collapse T-280	+	spacer	1	1
Chimpanzee	CM054439.2	chr5_hap1_hsa6	1679262	1679630	Collapse T-281	-	spacer	2	1
Chimpanzee	CM054439.2	chr5_hap1_hsa6	4331480	4332147	Collapse T-282	-	spacer	2	1
Chimpanzee	CM054439.2	chr5_hap1_hsa6	4562461	4562672	Collapse T-283	-	spacer	1	1
Chimpanzee	CM054439.2	chr5_hap1_hsa6	4564336	4564598	Collapse T-284	-	spacer	1	1
Chimpanzee	CM054439.2	chr5_hap1_hsa6	4845588	4847105	Collapse T-285	-	spacer	1	1
Chimpanzee	CM054439.2	chr5_hap1_hsa6	4825533	4825803	Collapse T-286	+	spacer	1	1
Chimpanzee	CM054448.2	chr14_hap1_hsa13	46167101	46167349	Collapse T-287	-	spacer	1	1
Chimpanzee	CM054448.2	chr14_hap1_hsa13	46357209	46357353	Collapse T-288	-	spacer	1	1
Chimpanzee	CM054439.2	chr5_hap1_hsa6	5069995	5071916	Collapse T-289	-	spacer	2	1
Chimpanzee	CM054448.2	chr14_hap1_hsa13	46751668	46754240	Collapse T-290	-	spacer	2	2
Chimpanzee	CM054448.2	chr14_hap1_hsa13	47046383	47046486	Collapse T-291	+	spacer	1	1
Chimpanzee	CM054448.2	chr14_hap1_hsa13	46983214	46986230	Collapse T-292	-	spacer	3	3
Chimpanzee	CM054448.2	chr14_hap1_hsa13	46988974	46992019	Collapse T-293	-	spacer	1	1
Chimpanzee	CM054448.2	chr14_hap1_hsa13	47048521	47051593	Collapse T-294	-	spacer	3	1
Chimpanzee	CM054448.2	chr14_hap1_hsa13	47049159	47052894	Collapse T-295	-	spacer	3	1
Chimpanzee	CM054448.2	chr14_hap1_hsa13	47060129	47060404	Collapse T-296	-	spacer	1	1
Chimpanzee	CM054448.2	chr14_hap1_hsa13	47057797	47059979	Collapse T-297	+	spacer	2	2
Chimpanzee	CM068905.1	chr2_hap1_hsa3	2843620	2844356	Collapse T-298	+	spacer	2	1
Chimpanzee	CM054439.2	chr5_hap1_hsa6	5644455	5644831	Collapse T-299	-	spacer	1	1
Chimpanzee	CM054448.2	chr14_hap1_hsa13	47406252	47410606	Collapse T-300	-	spacer	1	1
Chimpanzee	CM054448.2	chr14_hap1_hsa13	47538434	47540441	Collapse T-301	+	spacer	1	1
Chimpanzee	CM054448.2	chr14_hap1_hsa13	47524502	47525673	Collapse T-302	-	spacer	1	1
Chimpanzee	CM054439.2	chr5_hap1_hsa6	5754517	5761966	Collapse T-303	-	spacer	1	1
Chimpanzee	CM054448.2	chr14_hap1_hsa13	48075935	48076203	Collapse T-304	-	spacer	1	1
Chimpanzee	CM054448.2	chr14_hap1_hsa13	48077661	48077987	Collapse T-305	-	spacer	1	1
Chimpanzee	CM054448.2	chr14_hap1_hsa13	48244563	48245029	Collapse T-306	-	spacer	1	1
Chimpanzee	CM054448.2	chr14_hap1_hsa13	48697794	48698214	Collapse T-307	+	spacer	1	1
Chimpanzee	CM054448.2	chr14_hap1_hsa13	48704820	48705065	Collapse T-308	-	spacer	1	1
Chimpanzee	CM054448.2	chr14_hap1_hsa13	49395723	49396126	Collapse T-309	-	spacer	1	1
Chimpanzee	CM054448.2	chr14_hap1_hsa13	49518800	49520354	Collapse T-310	-	spacer	1	1
Chimpanzee	CM054448.2	chr14_hap1_hsa13	49521765	49521921	Collapse T-311	-	spacer	1	1
Chimpanzee	CM054448.2	chr14_hap1_hsa13	49597230	49597682	Collapse T-312	-	spacer	1	1
Chimpanzee	CM054448.2	chr14_hap1_hsa13	49828289	49829044	Collapse T-313	-	spacer	1	1
Chimpanzee	CM054448.2	chr14_hap1_hsa13	50097296	50097496	Collapse T-314	-	spacer	1	1
Chimpanzee	CM054448.2	chr14_hap1_hsa13	49374799	49375991	Collapse T-315	+	spacer	2	1
Chimpanzee	CM054448.2	chr14_hap1_hsa13	50323137	50323332	Collapse T-316	+	spacer	2	1
Chimpanzee	CM054448.2	chr14_hap1_hsa13	50295316	50298653	Collapse T-317	-	spacer	1	2
Chimpanzee	CM054448.2	chr14_hap1_hsa13	50295316	50299547	Collapse T-318	-	spacer	1	3
Chimpanzee	CM054448.2	chr14_hap1_hsa13	50341454	50341865	Collapse T-319	-	spacer	1	1
Chimpanzee	CM054448.2	chr14_hap1_hsa13	50610066	50610772	Collapse T-320	-	spacer	1	1
Chimpanzee	CM054448.2	chr14_hap1_hsa13	50328860	50329108	Collapse T-321	+	spacer	1	1
Chimpanzee	CM054448.2	chr14_hap1_hsa13	50706281	50706471	Collapse T-322	+	spacer	1	1
Chimpanzee	CM054448.2	chr14_hap1_hsa13	50712118	50712248	Collapse T-323	+	spacer	1	1
Chimpanzee	CM054448.2	chr14_hap1_hsa13	50724596	50724850	Collapse T-324	-	spacer	1	1
Chimpanzee	CM054448.2	chr14_hap1_hsa13	50793676	50797381	Collapse T-325	-	spacer	2	2
Chimpanzee	CM054448.2	chr14_hap1_hsa13	50786811	50787076	Collapse T-326	+	spacer	1	1
Chimpanzee	CM054448.2	chr14_hap1_hsa13	50799416	50803143	Collapse T-327	-	spacer	3	1
Chimpanzee	CM054448.2	chr14_hap1_hsa13	51165770	51168310	Collapse T-328	-	spacer	1	1
Chimpanzee	CM054448.2	chr14_hap1_hsa13	51386322	51386566	Collapse T-329	-	spacer	1	1
Chimpanzee	CM054448.2	chr14_hap1_hsa13	51953709	51955616	Collapse T-330	-	spacer	1	1
Chimpanzee	CM054448.2	chr14_hap1_hsa13	51969832	51974282	Collapse T-331	-	spacer	3	1
Chimpanzee	CM054448.2	chr14_hap1_hsa13	51970860	51973373	Collapse T-332	-	spacer	1	1
Chimpanzee	CM054448.2	chr14_hap1_hsa13	51971071	51973731	Collapse T-333	-	spacer	1	1
Chimpanzee	CM054448.2	chr14_hap1_hsa13	51971726	51973362	Collapse T-334	-	spacer	1	1
Chimpanzee	CM054448.2	chr14_hap1_hsa13	51978898	51980799	Collapse T-335	-	spacer	1	1
Chimpanzee	CM054448.2	chr14_hap1_hsa13	51741249	51741953	Collapse T-336	-	spacer	2	1
Chimpanzee	CM054448.2	chr14_hap1_hsa13	52016296	52020174	Collapse T-337	-	spacer	5	2
Chimpanzee	CM054448.2	chr14_hap1_hsa13	52016312	52019033	Collapse T-338	-	spacer	1	1
Chimpanzee	CM054448.2	chr14_hap1_hsa13	52016312	52032415	Collapse T-339	-	spacer	1	2
Chimpanzee	CM054448.2	chr14_hap1_hsa13	52022057	52028945	Collapse T-340	-	spacer	4	1
Chimpanzee	CM054448.2	chr14_hap1_hsa13	52023954	52028503	Collapse T-341	-	spacer	1	1
Chimpanzee	CM054448.2	chr14_hap1_hsa13	52029674	52032896	Collapse T-342	-	spacer	1	1
Chimpanzee	CM054448.2	chr14_hap1_hsa13	51748655	51751835	Collapse T-343	-	spacer	2	1
Chimpanzee	CM054439.2	chr5_hap1_hsa6	5634384	5634893	Collapse T-344	+	spacer	1	1
Chimpanzee	CM054439.2	chr5_hap1_hsa6	6071526	6073959	Collapse T-345	-	spacer	1	1
Chimpanzee	CM054439.2	chr5_hap1_hsa6	6072398	6074496	Collapse T-346	-	spacer	1	1
Chimpanzee	CM054439.2	chr5_hap1_hsa6	6078097	6081346	Collapse T-347	-	spacer	2	2
Chimpanzee	CM054439.2	chr5_hap1_hsa6	6078109	6081368	Collapse T-348	-	spacer	1	1
Chimpanzee	CM054439.2	chr5_hap1_hsa6	6079710	6082082	Collapse T-349	-	spacer	1	2
Chimpanzee	CM054439.2	chr5_hap1_hsa6	6079712	6081777	Collapse T-350	-	spacer	1	2
Chimpanzee	CM054439.2	chr5_hap1_hsa6	6082122	6083646	Collapse T-351	-	spacer	4	1
Chimpanzee	CM054439.2	chr5_hap1_hsa6	6087874	6090532	Collapse T-352	-	spacer	4	1
Chimpanzee	CM054439.2	chr5_hap1_hsa6	6080521	6083181	Collapse T-353	+	spacer	1	2
Chimpanzee	CM054439.2	chr5_hap1_hsa6	6080526	6096758	Collapse T-354	+	spacer	1	3
Chimpanzee	CM054439.2	chr5_hap1_hsa6	6080529	6083181	Collapse T-355	+	spacer	1	2
Chimpanzee	CM054439.2	chr5_hap1_hsa6	6080844	6083212	Collapse T-356	+	spacer	1	1
Chimpanzee	CM054439.2	chr5_hap1_hsa6	6089221	6092987	Collapse T-357	+	spacer	1	1
Chimpanzee	CM054439.2	chr5_hap1_hsa6	6073257	6075506	Collapse T-358	+	spacer	3	1
Chimpanzee	CM054439.2	chr5_hap1_hsa6	6080488	6094824	Collapse T-359	+	spacer	1	3
Chimpanzee	CM054450.2	chr16_hap1_hsa15	2021659	2023771	Collapse T-360	+	spacer	3	1
Chimpanzee	CM054450.2	chr16_hap1_hsa15	2033340	2033491	Collapse T-361	-	spacer	1	1
Chimpanzee	CM054450.2	chr16_hap1_hsa15	3927462	3929388	Collapse T-362	-	spacer	3	1
Chimpanzee	CM054450.2	chr16_hap1_hsa15	3951015	3952659	Collapse T-363	-	spacer	1	1
Chimpanzee	CM054450.2	chr16_hap1_hsa15	4076024	4077964	Collapse T-364	-	spacer	1	1
Chimpanzee	CM054450.2	chr16_hap1_hsa15	4185523	4187326	Collapse T-365	-	spacer	1	1
Chimpanzee	CM054450.2	chr16_hap1_hsa15	4858493	4859828	Collapse T-366	-	spacer	3	1
Chimpanzee	CM054450.2	chr16_hap1_hsa15	4850029	4850317	Collapse T-367	+	spacer	1	1
Chimpanzee	CM054450.2	chr16_hap1_hsa15	5037675	5039595	Collapse T-368	-	spacer	2	1
Chimpanzee	CM054450.2	chr16_hap1_hsa15	5042197	5044643	Collapse T-369	-	spacer	6	1
Chimpanzee	CM054450.2	chr16_hap1_hsa15	5043250	5049554	Collapse T-370	-	spacer	3	1
Chimpanzee	CM054450.2	chr16_hap1_hsa15	5044074	5046485	Collapse T-371	-	spacer	2	1
Chimpanzee	CM054450.2	chr16_hap1_hsa15	5049579	5051044	Collapse T-372	-	spacer	5	1
Chimpanzee	CM054450.2	chr16_hap1_hsa15	5049783	5052119	Collapse T-373	-	spacer	1	1
Chimpanzee	CM054450.2	chr16_hap1_hsa15	5051256	5052897	Collapse T-374	-	spacer	1	1
Chimpanzee	CM054452.2	chr18_hap1_hsa16	98637	98932	Collapse T-375	-	spacer	1	1
Chimpanzee	CM054452.2	chr18_hap1_hsa16	1206048	1207537	Collapse T-376	-	spacer	1	1
Chimpanzee	CM054452.2	chr18_hap1_hsa16	1301768	1304275	Collapse T-377	-	spacer	1	1
Chimpanzee	CM054452.2	chr18_hap1_hsa16	2041476	2043725	Collapse T-378	+	spacer	1	1
Chimpanzee	CM054452.2	chr18_hap1_hsa16	2268492	2269200	Collapse T-379	-	spacer	1	1
Chimpanzee	CM054452.2	chr18_hap1_hsa16	2274235	2275939	Collapse T-380	-	spacer	3	1
Chimpanzee	CM054452.2	chr18_hap1_hsa16	88503329	88503445	Collapse T-381	+	spacer	1	1
Chimpanzee	CM054452.2	chr18_hap1_hsa16	88513190	88516585	Collapse T-382	+	spacer	1	1
Chimpanzee	CM054452.2	chr18_hap1_hsa16	88515084	88515361	Collapse T-383	+	spacer	1	1
Chimpanzee	CM054452.2	chr18_hap1_hsa16	88522628	88523324	Collapse T-384	-	spacer	1	1
Chimpanzee	CM054452.2	chr18_hap1_hsa16	89656355	89658034	Collapse T-385	+	spacer	1	1
Chimpanzee	CM054452.2	chr18_hap1_hsa16	89661654	89663778	Collapse T-386	+	spacer	4	1
Chimpanzee	CM054452.2	chr18_hap1_hsa16	90461310	90461701	Collapse T-387	-	spacer	2	1
Chimpanzee	CM054452.2	chr18_hap1_hsa16	90454667	90454994	Collapse T-388	+	spacer	1	1
Chimpanzee	CM054452.2	chr18_hap1_hsa16	90540290	90541096	Collapse T-389	-	spacer	1	1
Chimpanzee	CM054452.2	chr18_hap1_hsa16	90565442	90565691	Collapse T-390	-	spacer	1	1
Chimpanzee	CM054452.2	chr18_hap1_hsa16	90548885	90553083	Collapse T-391	+	spacer	2	1
Chimpanzee	CM054452.2	chr18_hap1_hsa16	92984625	92985498	Collapse T-392	-	spacer	2	1
Chimpanzee	CM054452.2	chr18_hap1_hsa16	93205346	93205566	Collapse T-393	-	spacer	1	1
Chimpanzee	CM054452.2	chr18_hap1_hsa16	93604286	93604506	Collapse T-394	-	spacer	1	1
Chimpanzee	CM054452.2	chr18_hap1_hsa16	93807718	93807819	Collapse T-395	-	spacer	1	1
Chimpanzee	CM054452.2	chr18_hap1_hsa16	93940607	93940904	Collapse T-396	+	spacer	1	1
Chimpanzee	CM054452.2	chr18_hap1_hsa16	93962305	93962694	Collapse T-397	-	spacer	1	1
Chimpanzee	CM054440.2	chr6_hap1_hsa7	91268	91373	Collapse T-398	+	spacer	1	1
Chimpanzee	CM054452.2	chr18_hap1_hsa16	94421915	94422028	Collapse T-399	+	spacer	1	1
Chimpanzee	CM054453.2	chr19_hap1_hsa17	101622	101883	Collapse T-400	-	spacer	1	1
Chimpanzee	CM054453.2	chr19_hap1_hsa17	3285246	3285457	Collapse T-401	-	spacer	2	1
Chimpanzee	CM054440.2	chr6_hap1_hsa7	104984	105260	Collapse T-402	-	spacer	1	1
Chimpanzee	CM054453.2	chr19_hap1_hsa17	3519541	3519671	Collapse T-403	+	spacer	1	1
Chimpanzee	CM054453.2	chr19_hap1_hsa17	4104940	4105274	Collapse T-404	+	spacer	1	1
Chimpanzee	CM054453.2	chr19_hap1_hsa17	4111896	4112276	Collapse T-405	-	spacer	1	1
Chimpanzee	CM054453.2	chr19_hap1_hsa17	4699215	4699437	Collapse T-406	+	spacer	1	1
Chimpanzee	CM054453.2	chr19_hap1_hsa17	4833863	4835077	Collapse T-407	-	spacer	1	1
Chimpanzee	CM054453.2	chr19_hap1_hsa17	5001969	5002325	Collapse T-408	-	spacer	1	1
Chimpanzee	CM054453.2	chr19_hap1_hsa17	5514971	5515053	Collapse T-409	-	spacer	1	1
Chimpanzee	CM054453.2	chr19_hap1_hsa17	6469017	6469182	Collapse T-410	-	spacer	1	1
Chimpanzee	CM054453.2	chr19_hap1_hsa17	7170073	7170162	Collapse T-411	-	spacer	1	1
Chimpanzee	CM054453.2	chr19_hap1_hsa17	4835351	4837608	Collapse T-412	+	spacer	2	1
Chimpanzee	CM054453.2	chr19_hap1_hsa17	7657630	7658132	Collapse T-413	-	spacer	1	1
Chimpanzee	CM054453.2	chr19_hap1_hsa17	7760172	7760408	Collapse T-414	-	spacer	1	1
Chimpanzee	CM054453.2	chr19_hap1_hsa17	7650299	7651009	Collapse T-415	+	spacer	1	1
Chimpanzee	CM054453.2	chr19_hap1_hsa17	7760495	7762584	Collapse T-416	-	spacer	1	1
Chimpanzee	CM054453.2	chr19_hap1_hsa17	8003174	8003431	Collapse T-417	+	spacer	1	1
Chimpanzee	CM054453.2	chr19_hap1_hsa17	8207904	8208062	Collapse T-418	-	spacer	1	1
Chimpanzee	CM054453.2	chr19_hap1_hsa17	8774093	8775606	Collapse T-419	+	spacer	2	1
Chimpanzee	CM054453.2	chr19_hap1_hsa17	8937407	8937496	Collapse T-420	+	spacer	1	1
Chimpanzee	CM054453.2	chr19_hap1_hsa17	8771861	8774850	Collapse T-421	-	spacer	1	1
Chimpanzee	CM054453.2	chr19_hap1_hsa17	9708567	9708797	Collapse T-422	-	spacer	1	1
Chimpanzee	CM054453.2	chr19_hap1_hsa17	9811107	9811286	Collapse T-423	-	spacer	1	1
Chimpanzee	CM054440.2	chr6_hap1_hsa7	1112677	1112985	Collapse T-424	-	spacer	1	1
Chimpanzee	CM054453.2	chr19_hap1_hsa17	9725026	9725441	Collapse T-425	+	spacer	1	1
Chimpanzee	CM054453.2	chr19_hap1_hsa17	9935993	9936094	Collapse T-426	+	spacer	1	1
Chimpanzee	CM054453.2	chr19_hap1_hsa17	9949124	9949457	Collapse T-427	-	spacer	1	1
Chimpanzee	CM054453.2	chr19_hap1_hsa17	9941700	9941870	Collapse T-428	+	spacer	1	1
Chimpanzee	CM054453.2	chr19_hap1_hsa17	10472293	10472977	Collapse T-429	+	spacer	1	1
Chimpanzee	CM054440.2	chr6_hap1_hsa7	744013	744450	Collapse T-430	+	spacer	1	1
Chimpanzee	CM054440.2	chr6_hap1_hsa7	2078519	2078626	Collapse T-431	-	spacer	1	1
Chimpanzee	CM054440.2	chr6_hap1_hsa7	3921503	3921645	Collapse T-432	+	spacer	3	1
Chimpanzee	CM054440.2	chr6_hap1_hsa7	3924265	3924712	Collapse T-433	-	spacer	1	1
Chimpanzee	CM054440.2	chr6_hap1_hsa7	4323410	4324260	Collapse T-434	+	spacer	1	1
Chimpanzee	CM054440.2	chr6_hap1_hsa7	5671086	5671169	Collapse T-435	-	spacer	1	1
Chimpanzee	CM054453.2	chr19_hap1_hsa17	96736011	96737117	Collapse T-436	+	spacer	2	1
Chimpanzee	CM054453.2	chr19_hap1_hsa17	96731847	96732415	Collapse T-437	-	spacer	1	1
Chimpanzee	CM054453.2	chr19_hap1_hsa17	96746835	96750218	Collapse T-438	+	spacer	1	1
Chimpanzee	CM054453.2	chr19_hap1_hsa17	98011948	98014197	Collapse T-439	-	spacer	1	1
Chimpanzee	CM054453.2	chr19_hap1_hsa17	98537207	98538160	Collapse T-440	+	spacer	1	1
Chimpanzee	CM054453.2	chr19_hap1_hsa17	98550550	98550651	Collapse T-441	-	spacer	1	1
Chimpanzee	CM054453.2	chr19_hap1_hsa17	98743109	98743444	Collapse T-442	-	spacer	1	1
Chimpanzee	CM054453.2	chr19_hap1_hsa17	98744474	98746218	Collapse T-443	+	spacer	2	1
Chimpanzee	CM054453.2	chr19_hap1_hsa17	98744664	98746854	Collapse T-444	+	spacer	1	1
Chimpanzee	CM054454.2	chr20_hap1_hsa19	357970	358058	Collapse T-445	+	spacer	1	1
Chimpanzee	CM054454.2	chr20_hap1_hsa19	2154546	2154757	Collapse T-446	-	spacer	1	1
Chimpanzee	CM054454.2	chr20_hap1_hsa19	2351144	2355054	Collapse T-447	-	spacer	2	1
Chimpanzee	CM054454.2	chr20_hap1_hsa19	2357226	2359865	Collapse T-448	-	spacer	2	1
Chimpanzee	CM054454.2	chr20_hap1_hsa19	2361823	2362509	Collapse T-449	+	spacer	1	1
Chimpanzee	CM054454.2	chr20_hap1_hsa19	61613032	61613917	Collapse T-450	+	spacer	1	1
Chimpanzee	CM054454.2	chr20_hap1_hsa19	61601264	61601950	Collapse T-451	-	spacer	1	1
Chimpanzee	CM054454.2	chr20_hap1_hsa19	61615830	61618588	Collapse T-452	+	spacer	1	1
Chimpanzee	CM054454.2	chr20_hap1_hsa19	61625787	61626351	Collapse T-453	-	spacer	1	1
Chimpanzee	CM054454.2	chr20_hap1_hsa19	61629459	61631094	Collapse T-454	+	spacer	1	1
Chimpanzee	CM054454.2	chr20_hap1_hsa19	63321790	63322048	Collapse T-455	-	spacer	1	1
Chimpanzee	CM054454.2	chr20_hap1_hsa19	62368051	62368193	Collapse T-456	+	spacer	1	1
Chimpanzee	CM054454.2	chr20_hap1_hsa19	64117857	64118063	Collapse T-457	+	spacer	1	1
Chimpanzee	CM054454.2	chr20_hap1_hsa19	64359258	64359717	Collapse T-458	-	spacer	1	1
Chimpanzee	CM054454.2	chr20_hap1_hsa19	64382753	64385181	Collapse T-459	-	spacer	3	1
Chimpanzee	CM054454.2	chr20_hap1_hsa19	65283386	65284294	Collapse T-460	-	spacer	1	1
Chimpanzee	CM054454.2	chr20_hap1_hsa19	64362457	64362797	Collapse T-461	+	spacer	1	1
Chimpanzee	CM054454.2	chr20_hap1_hsa19	65450570	65450679	Collapse T-462	-	spacer	1	1
Chimpanzee	CM054454.2	chr20_hap1_hsa19	65594955	65595081	Collapse T-463	+	spacer	1	1
Chimpanzee	CM054454.2	chr20_hap1_hsa19	65601695	65602037	Collapse T-464	-	spacer	1	1
Chimpanzee	CM054454.2	chr20_hap1_hsa19	66635164	66635607	Collapse T-465	-	spacer	1	1
Chimpanzee	CM054454.2	chr20_hap1_hsa19	66741608	66742938	Collapse T-466	-	spacer	1	1
Chimpanzee	CM054454.2	chr20_hap1_hsa19	66886409	66886491	Collapse T-467	+	spacer	1	1
Chimpanzee	CM054454.2	chr20_hap1_hsa19	66898161	66898383	Collapse T-468	+	spacer	1	1
Chimpanzee	CM054454.2	chr20_hap1_hsa19	66899413	66899604	Collapse T-469	+	spacer	1	1
Chimpanzee	CM054454.2	chr20_hap1_hsa19	66906236	66906472	Collapse T-470	-	spacer	1	1
Chimpanzee	CM054454.2	chr20_hap1_hsa19	67397599	67398570	Collapse T-471	-	spacer	2	1
Chimpanzee	CM054454.2	chr20_hap1_hsa19	67028330	67029493	Collapse T-472	+	spacer	1	1
Chimpanzee	CM054455.2	chr21_hap1_hsa20	2036585	2037380	Collapse T-473	-	spacer	1	1
Chimpanzee	CM054455.2	chr21_hap1_hsa20	2177169	2179492	Collapse T-474	-	spacer	1	1
Chimpanzee	CM054455.2	chr21_hap1_hsa20	2733429	2733524	Collapse T-475	+	spacer	1	1
Chimpanzee	CM054455.2	chr21_hap1_hsa20	3426449	3426554	Collapse T-476	-	spacer	1	1
Chimpanzee	CM054455.2	chr21_hap1_hsa20	4639188	4639431	Collapse T-477	+	spacer	1	1
Chimpanzee	CM054455.2	chr21_hap1_hsa20	4651822	4652369	Collapse T-478	-	spacer	1	1
Chimpanzee	CM054455.2	chr21_hap1_hsa20	4656483	4656931	Collapse T-479	+	spacer	1	1
Chimpanzee	CM054455.2	chr21_hap1_hsa20	5493147	5494864	Collapse T-480	+	spacer	1	1
Chimpanzee	CM054455.2	chr21_hap1_hsa20	5493322	5495108	Collapse T-481	+	spacer	1	1
Chimpanzee	CM054455.2	chr21_hap1_hsa20	5497867	5498605	Collapse T-482	+	spacer	1	1
Chimpanzee	CM054455.2	chr21_hap1_hsa20	5177417	5177690	Collapse T-483	-	spacer	1	1
Chimpanzee	CM054455.2	chr21_hap1_hsa20	6215869	6216751	Collapse T-484	-	spacer	1	1
Chimpanzee	CM054455.2	chr21_hap1_hsa20	6217117	6217393	Collapse T-485	-	spacer	1	1
Chimpanzee	CM054455.2	chr21_hap1_hsa20	6209160	6209262	Collapse T-486	+	spacer	1	1
Chimpanzee	CM054455.2	chr21_hap1_hsa20	6221618	6224717	Collapse T-487	-	spacer	1	2
Chimpanzee	CM054455.2	chr21_hap1_hsa20	6229594	6230429	Collapse T-488	-	spacer	1	1
Chimpanzee	CM054455.2	chr21_hap1_hsa20	6223153	6227654	Collapse T-489	+	spacer	1	2
Chimpanzee	CM054455.2	chr21_hap1_hsa20	6718553	6720802	Collapse T-490	+	spacer	2	1
Chimpanzee	CM054455.2	chr21_hap1_hsa20	6725808	6728484	Collapse T-491	+	spacer	1	3
Chimpanzee	CM054455.2	chr21_hap1_hsa20	6726174	6728484	Collapse T-492	+	spacer	2	1
Chimpanzee	CM054455.2	chr21_hap1_hsa20	6726686	6728484	Collapse T-493	+	spacer	1	3
Chimpanzee	CM054455.2	chr21_hap1_hsa20	6727299	6728484	Collapse T-494	+	spacer	1	2
Chimpanzee	CM054455.2	chr21_hap1_hsa20	6734053	6739702	Collapse T-495	+	spacer	1	1
Chimpanzee	CM054455.2	chr21_hap1_hsa20	6740188	6740852	Collapse T-496	+	spacer	1	1
Chimpanzee	CM054455.2	chr21_hap1_hsa20	6744301	6745929	Collapse T-497	+	spacer	3	1
Chimpanzee	CM054455.2	chr21_hap1_hsa20	6716381	6719120	Collapse T-498	-	spacer	1	1
Chimpanzee	CM054455.2	chr21_hap1_hsa20	6716838	6718383	Collapse T-499	-	spacer	1	1
Chimpanzee	CM054455.2	chr21_hap1_hsa20	6717074	6721552	Collapse T-500	-	spacer	7	1
Chimpanzee	CM054455.2	chr21_hap1_hsa20	6717413	6718118	Collapse T-501	-	spacer	1	1
Chimpanzee	CM054455.2	chr21_hap1_hsa20	6718475	6720241	Collapse T-502	-	spacer	1	1
Chimpanzee	CM054455.2	chr21_hap1_hsa20	6723384	6726058	Collapse T-503	-	spacer	3	1
Chimpanzee	CM054455.2	chr21_hap1_hsa20	6727434	6730769	Collapse T-504	-	spacer	44	1
Chimpanzee	CM054455.2	chr21_hap1_hsa20	6727430	6746234	Collapse T-505	-	spacer	1	2
Chimpanzee	CM054455.2	chr21_hap1_hsa20	6727430	6744280	Collapse T-506	-	spacer	1	2
Chimpanzee	CM054455.2	chr21_hap1_hsa20	6728391	6729575	Collapse T-507	-	spacer	1	1
Chimpanzee	CM054455.2	chr21_hap1_hsa20	6728664	6731310	Collapse T-508	-	spacer	8	1
Chimpanzee	CM054455.2	chr21_hap1_hsa20	6728834	6729655	Collapse T-509	-	spacer	1	1
Chimpanzee	CM054455.2	chr21_hap1_hsa20	6730392	6731494	Collapse T-510	-	spacer	2	1
Chimpanzee	CM054455.2	chr21_hap1_hsa20	6733101	6736580	Collapse T-511	-	spacer	16	1
Chimpanzee	CM054455.2	chr21_hap1_hsa20	6733101	6735031	Collapse T-512	-	spacer	1	1
Chimpanzee	CM054455.2	chr21_hap1_hsa20	6734084	6739680	Collapse T-513	-	spacer	25	1
Chimpanzee	CM054455.2	chr21_hap1_hsa20	6734084	6739852	Collapse T-514	-	spacer	1	2
Chimpanzee	CM054455.2	chr21_hap1_hsa20	6734190	6736409	Collapse T-515	-	spacer	3	1
Chimpanzee	CM054455.2	chr21_hap1_hsa20	6735308	6738713	Collapse T-516	-	spacer	3	1
Chimpanzee	CM054455.2	chr21_hap1_hsa20	6740813	6746400	Collapse T-517	-	spacer	47	1
Chimpanzee	CM054455.2	chr21_hap1_hsa20	6741137	6743842	Collapse T-518	-	spacer	4	1
Chimpanzee	CM054455.2	chr21_hap1_hsa20	70861704	70864804	Collapse T-519	+	spacer	1	1
Chimpanzee	CM054455.2	chr21_hap1_hsa20	71028650	71028963	Collapse T-520	-	spacer	1	1
Chimpanzee	CM054455.2	chr21_hap1_hsa20	71191142	71191436	Collapse T-521	-	spacer	1	1
Chimpanzee	CM054455.2	chr21_hap1_hsa20	71655600	71656224	Collapse T-522	-	spacer	1	1
Chimpanzee	CM054455.2	chr21_hap1_hsa20	70878991	70880900	Collapse T-523	+	spacer	1	1
Chimpanzee	CM054455.2	chr21_hap1_hsa20	72740983	72741171	Collapse T-524	+	spacer	1	1
Chimpanzee	CM054455.2	chr21_hap1_hsa20	73110531	73110652	Collapse T-525	-	spacer	1	1
Chimpanzee	CM054455.2	chr21_hap1_hsa20	74255706	74255912	Collapse T-526	+	spacer	1	1
Chimpanzee	CM054455.2	chr21_hap1_hsa20	77750220	77751279	Collapse T-527	+	spacer	1	1
Chimpanzee	CM054455.2	chr21_hap1_hsa20	78014182	78015084	Collapse T-528	+	spacer	1	1
Chimpanzee	CM054455.2	chr21_hap1_hsa20	77737115	77740325	Collapse T-529	-	spacer	1	3
Chimpanzee	CM054456.2	chr22_hap1_hsa21	47427157	47428930	Collapse T-530	+	spacer	2	1
Chimpanzee	CM054456.2	chr22_hap1_hsa21	47427750	47428726	Collapse T-531	+	spacer	1	1
Chimpanzee	CM054456.2	chr22_hap1_hsa21	47437438	47439028	Collapse T-532	+	spacer	1	1
Chimpanzee	CM054456.2	chr22_hap1_hsa21	47423651	47424337	Collapse T-533	-	spacer	1	1
Chimpanzee	CM054456.2	chr22_hap1_hsa21	48388409	48388510	Collapse T-534	-	spacer	1	1
Chimpanzee	CM054456.2	chr22_hap1_hsa21	48375878	48376000	Collapse T-535	+	spacer	1	1
Chimpanzee	CM054456.2	chr22_hap1_hsa21	48688913	48689166	Collapse T-536	-	spacer	1	1
Chimpanzee	CM054456.2	chr22_hap1_hsa21	48682133	48682292	Collapse T-537	+	spacer	1	1
Chimpanzee	CM054456.2	chr22_hap1_hsa21	49680610	49683634	Collapse T-538	+	spacer	3	1
Chimpanzee	CM054456.2	chr22_hap1_hsa21	51256023	51256104	Collapse T-539	+	spacer	1	1
Chimpanzee	CM068906.1	chr23_hap1_hsa22	53127942	53128628	Collapse T-540	-	spacer	1	1
Chimpanzee	CM068906.1	chr23_hap1_hsa22	53153230	53156645	Collapse T-541	-	spacer	2	1
Chimpanzee	CM068906.1	chr23_hap1_hsa22	53544688	53545800	Collapse T-542	-	spacer	1	1
Chimpanzee	CM068906.1	chr23_hap1_hsa22	55963485	55963589	Collapse T-543	-	spacer	1	1
Chimpanzee	CM068906.1	chr23_hap1_hsa22	58146950	58151139	Collapse T-544	+	spacer	1	1
Chimpanzee	CM068906.1	chr23_hap1_hsa22	58149701	58150503	Collapse T-545	+	spacer	1	1
Chimpanzee	CM068906.1	chr23_hap1_hsa22	58715710	58716757	Collapse T-546	+	spacer	1	1
Chimpanzee	CM068906.1	chr23_hap1_hsa22	59428290	59428562	Collapse T-547	+	spacer	1	1
Chimpanzee	CM054457.2	chrX_hap1_hsaX	591999	593124	Collapse T-548	-	spacer	1	1
Chimpanzee	CM054457.2	chrX_hap1_hsaX	596428	599104	Collapse T-549	-	spacer	1	2
Chimpanzee	CM054457.2	chrX_hap1_hsaX	596628	597873	Collapse T-550	-	spacer	1	1
Chimpanzee	CM054457.2	chrX_hap1_hsaX	602206	606023	Collapse T-551	-	spacer	2	1
Chimpanzee	CM054457.2	chrX_hap1_hsaX	606711	609435	Collapse T-552	-	spacer	8	1
Chimpanzee	CM054457.2	chrX_hap1_hsaX	608601	610272	Collapse T-553	-	spacer	2	1
Chimpanzee	CM054457.2	chrX_hap1_hsaX	614109	615717	Collapse T-554	-	spacer	2	1
Chimpanzee	CM054457.2	chrX_hap1_hsaX	605738	605991	Collapse T-555	+	spacer	1	1
Chimpanzee	CM054458.2	chrY_hap2_hsaY	36049965	36052917	Collapse T-556	+	spacer	3	1
Chimpanzee	CM054458.2	chrY_hap2_hsaY	36051360	36053116	Collapse T-557	+	spacer	1	1
Chimpanzee	CM054458.2	chrY_hap2_hsaY	36054498	36063293	Collapse T-558	+	spacer	1	2
Chimpanzee	CM054458.2	chrY_hap2_hsaY	36054530	36058624	Collapse T-559	+	spacer	7	1
Chimpanzee	CM054458.2	chrY_hap2_hsaY	36056384	36060514	Collapse T-560	+	spacer	9	1
Chimpanzee	CM054458.2	chrY_hap2_hsaY	36058405	36059486	Collapse T-561	+	spacer	1	1
Chimpanzee	CM054458.2	chrY_hap2_hsaY	36061039	36063293	Collapse T-562	+	spacer	3	1
Chimpanzee	CM054458.2	chrY_hap2_hsaY	36062550	36065014	Collapse T-563	+	spacer	4	1
Chimpanzee	CM054458.2	chrY_hap2_hsaY	36062634	36065162	Collapse T-564	+	spacer	2	1
Chimpanzee	CM054458.2	chrY_hap2_hsaY	36063446	36066240	Collapse T-565	+	spacer	5	1
Chimpanzee	CM054458.2	chrY_hap2_hsaY	36064357	36066256	Collapse T-566	+	spacer	1	2
Chimpanzee	CM054458.2	chrY_hap2_hsaY	36066756	36068705	Collapse T-567	+	spacer	1	3
Chimpanzee	CM054458.2	chrY_hap2_hsaY	36070055	36072541	Collapse T-568	+	spacer	1	1
Chimpanzee	CM054458.2	chrY_hap2_hsaY	36075122	36076673	Collapse T-569	+	spacer	1	1
Chimpanzee	CM054440.2	chr6_hap1_hsa7	113304630	113305032	Collapse T-570	+	spacer	1	1
Chimpanzee	CM054440.2	chr6_hap1_hsa7	113441281	113442416	Collapse T-571	+	spacer	1	1
Chimpanzee	CM054440.2	chr6_hap1_hsa7	113448784	113449234	Collapse T-572	-	spacer	1	1
Chimpanzee	CM054440.2	chr6_hap1_hsa7	113621783	113622072	Collapse T-573	+	spacer	1	1
Chimpanzee	CM054440.2	chr6_hap1_hsa7	113622805	113623813	Collapse T-574	-	spacer	1	1
Chimpanzee	CM054440.2	chr6_hap1_hsa7	113633576	113633928	Collapse T-575	+	spacer	1	1
Chimpanzee	CM054440.2	chr6_hap1_hsa7	113854057	113854735	Collapse T-576	+	spacer	1	1
Chimpanzee	CM054440.2	chr6_hap1_hsa7	113842078	113843782	Collapse T-577	-	spacer	1	1
Chimpanzee	CM054440.2	chr6_hap1_hsa7	113889871	113890119	Collapse T-578	-	spacer	1	1
Chimpanzee	CM054440.2	chr6_hap1_hsa7	113895613	113897817	Collapse T-579	-	spacer	4	1
Chimpanzee	CM054440.2	chr6_hap1_hsa7	113881442	113883273	Collapse T-580	+	spacer	2	1
Chimpanzee	CM054440.2	chr6_hap1_hsa7	113984727	113985148	Collapse T-581	-	spacer	1	1
Chimpanzee	CM054440.2	chr6_hap1_hsa7	114475169	114475839	Collapse T-582	+	spacer	1	1
Chimpanzee	CM054440.2	chr6_hap1_hsa7	114472730	114474409	Collapse T-583	-	spacer	1	1
Chimpanzee	CM054440.2	chr6_hap1_hsa7	114709440	114711541	Collapse T-584	-	spacer	1	1
Chimpanzee	CM054440.2	chr6_hap1_hsa7	114901829	114903896	Collapse T-585	-	spacer	1	1
Chimpanzee	CM054440.2	chr6_hap1_hsa7	114709161	114710694	Collapse T-586	+	spacer	1	1
Chimpanzee	CM054440.2	chr6_hap1_hsa7	114912196	114913358	Collapse T-587	-	spacer	1	1
Chimpanzee	CM054440.2	chr6_hap1_hsa7	115495289	115495450	Collapse T-588	-	spacer	1	1
Chimpanzee	CM054440.2	chr6_hap1_hsa7	115482330	115485726	Collapse T-589	+	spacer	2	1
Chimpanzee	CM054440.2	chr6_hap1_hsa7	115952320	115952436	Collapse T-590	+	spacer	1	1
Chimpanzee	CM054440.2	chr6_hap1_hsa7	116084339	116084739	Collapse T-591	+	spacer	1	1
Chimpanzee	CM054440.2	chr6_hap1_hsa7	115640047	115640529	Collapse T-592	-	spacer	1	1
Chimpanzee	CM054440.2	chr6_hap1_hsa7	116314866	116317359	Collapse T-593	-	spacer	1	1
Chimpanzee	CM054440.2	chr6_hap1_hsa7	116455504	116456551	Collapse T-594	+	spacer	1	1
Chimpanzee	CM054440.2	chr6_hap1_hsa7	116607658	116609488	Collapse T-595	-	spacer	2	1
Chimpanzee	CM054440.2	chr6_hap1_hsa7	116954513	116957019	Collapse T-596	-	spacer	5	1
Chimpanzee	CM054440.2	chr6_hap1_hsa7	116967689	116969059	Collapse T-597	-	spacer	1	1
Chimpanzee	CM054440.2	chr6_hap1_hsa7	116799442	116799552	Collapse T-598	+	spacer	1	1
Chimpanzee	CM054440.2	chr6_hap1_hsa7	116969365	116970828	Collapse T-599	-	spacer	1	1
Chimpanzee	CM054440.2	chr6_hap1_hsa7	117382953	117386842	Collapse T-600	-	spacer	5	1
Chimpanzee	CM054440.2	chr6_hap1_hsa7	117392096	117392511	Collapse T-601	+	spacer	1	1
Chimpanzee	CM054440.2	chr6_hap1_hsa7	117393219	117395247	Collapse T-602	-	spacer	7	1
Chimpanzee	CM054440.2	chr6_hap1_hsa7	117394300	117396676	Collapse T-603	-	spacer	1	1
Chimpanzee	CM054440.2	chr6_hap1_hsa7	117394448	117396705	Collapse T-604	-	spacer	5	1
Chimpanzee	CM054440.2	chr6_hap1_hsa7	117394450	117411474	Collapse T-605	-	spacer	2	2
Chimpanzee	CM054440.2	chr6_hap1_hsa7	117398943	117403914	Collapse T-606	-	spacer	7	1
Chimpanzee	CM054440.2	chr6_hap1_hsa7	117400826	117403115	Collapse T-607	-	spacer	1	1
Chimpanzee	CM054440.2	chr6_hap1_hsa7	117406329	117409768	Collapse T-608	-	spacer	4	1
Chimpanzee	CM054440.2	chr6_hap1_hsa7	117406528	117408743	Collapse T-609	-	spacer	1	1
Chimpanzee	CM054440.2	chr6_hap1_hsa7	117408000	117409505	Collapse T-610	-	spacer	1	1
Chimpanzee	CM054440.2	chr6_hap1_hsa7	117403693	117404083	Collapse T-611	+	spacer	1	1
Chimpanzee	CM054440.2	chr6_hap1_hsa7	117906710	117908149	Collapse T-612	+	spacer	1	1
Chimpanzee	CM054440.2	chr6_hap1_hsa7	117923228	117923913	Collapse T-613	+	spacer	6	1
Chimpanzee	CM054440.2	chr6_hap1_hsa7	117895249	117911640	Collapse T-614	-	spacer	4	2
Chimpanzee	CM054440.2	chr6_hap1_hsa7	117895604	117897244	Collapse T-615	-	spacer	1	1
Chimpanzee	CM054440.2	chr6_hap1_hsa7	117895850	117899495	Collapse T-616	-	spacer	2	1
Chimpanzee	CM054440.2	chr6_hap1_hsa7	117899164	117901173	Collapse T-617	-	spacer	1	1
Chimpanzee	CM054440.2	chr6_hap1_hsa7	117905498	117907464	Collapse T-618	-	spacer	4	1
Chimpanzee	CM054440.2	chr6_hap1_hsa7	117906724	117908706	Collapse T-619	-	spacer	2	1
Chimpanzee	CM054440.2	chr6_hap1_hsa7	117911244	117917496	Collapse T-620	-	spacer	12	1
Chimpanzee	CM054441.2	chr7_hap1_hsa8	96691	96888	Collapse T-621	-	spacer	2	1
Chimpanzee	CM054441.2	chr7_hap1_hsa8	382879	383005	Collapse T-622	-	spacer	1	1
Chimpanzee	CM054441.2	chr7_hap1_hsa8	664389	665119	Collapse T-623	+	spacer	1	1
Chimpanzee	CM054441.2	chr7_hap1_hsa8	684879	685754	Collapse T-624	-	spacer	1	1
Chimpanzee	CM054441.2	chr7_hap1_hsa8	1956617	1956792	Collapse T-625	+	spacer	1	1
Chimpanzee	CM054441.2	chr7_hap1_hsa8	1962039	1962568	Collapse T-626	+	spacer	1	1
Chimpanzee	CM054441.2	chr7_hap1_hsa8	1538356	1538985	Collapse T-627	-	spacer	1	1
Chimpanzee	CM054441.2	chr7_hap1_hsa8	1972607	1972725	Collapse T-628	+	spacer	1	1
Chimpanzee	CM054441.2	chr7_hap1_hsa8	1982589	1983173	Collapse T-629	-	spacer	1	1
Chimpanzee	CM054441.2	chr7_hap1_hsa8	3383440	3383648	Collapse T-630	-	spacer	1	1
Chimpanzee	CM054441.2	chr7_hap1_hsa8	3389292	3389492	Collapse T-631	-	spacer	2	1
Chimpanzee	CM054441.2	chr7_hap1_hsa8	3396673	3396756	Collapse T-632	-	spacer	1	1
Chimpanzee	CM054441.2	chr7_hap1_hsa8	3388416	3388557	Collapse T-633	+	spacer	1	1
Chimpanzee	CM054441.2	chr7_hap1_hsa8	3728626	3728769	Collapse T-634	+	spacer	1	1
Chimpanzee	CM054441.2	chr7_hap1_hsa8	3751873	3752281	Collapse T-635	+	spacer	1	1
Chimpanzee	CM054441.2	chr7_hap1_hsa8	3540882	3543606	Collapse T-636	-	spacer	1	1
Chimpanzee	CM054441.2	chr7_hap1_hsa8	3542558	3544451	Collapse T-637	-	spacer	1	1
Chimpanzee	CM054441.2	chr7_hap1_hsa8	4733304	4733702	Collapse T-638	+	spacer	1	1
Chimpanzee	CM054441.2	chr7_hap1_hsa8	5149533	5151545	Collapse T-639	+	spacer	1	2
Chimpanzee	CM054441.2	chr7_hap1_hsa8	5982697	5983610	Collapse T-640	+	spacer	1	1
Chimpanzee	CM054441.2	chr7_hap1_hsa8	5136084	5137442	Collapse T-641	-	spacer	1	2
Chimpanzee	CM054441.2	chr7_hap1_hsa8	6909667	6910353	Collapse T-642	+	spacer	3	1
Chimpanzee	CM054441.2	chr7_hap1_hsa8	7062035	7062721	Collapse T-643	+	spacer	1	1
Chimpanzee	CM054441.2	chr7_hap1_hsa8	7044309	7046626	Collapse T-644	-	spacer	2	1
Chimpanzee	CM054441.2	chr7_hap1_hsa8	7050048	7050460	Collapse T-645	-	spacer	1	1
Chimpanzee	CM054441.2	chr7_hap1_hsa8	7057449	7058490	Collapse T-646	-	spacer	1	1
Chimpanzee	CM054441.2	chr7_hap1_hsa8	7059126	7061825	Collapse T-647	-	spacer	1	1
Chimpanzee	CM054442.2	chr8_hap1_hsa10	817194	818497	Collapse T-648	+	spacer	2	1
Chimpanzee	CM054442.2	chr8_hap1_hsa10	829791	830134	Collapse T-649	+	spacer	1	1
Chimpanzee	CM054442.2	chr8_hap1_hsa10	1572399	1572569	Collapse T-650	+	spacer	1	1
Chimpanzee	CM054442.2	chr8_hap1_hsa10	1594430	1596063	Collapse T-651	+	spacer	1	1
Chimpanzee	CM054442.2	chr8_hap1_hsa10	4059490	4060445	Collapse T-652	+	spacer	1	1
Chimpanzee	CM054442.2	chr8_hap1_hsa10	4083904	4084007	Collapse T-653	+	spacer	1	1
Chimpanzee	CM054442.2	chr8_hap1_hsa10	4409043	4409414	Collapse T-654	+	spacer	1	1
Chimpanzee	CM054442.2	chr8_hap1_hsa10	4067057	4069100	Collapse T-655	-	spacer	2	1
Chimpanzee	CM054442.2	chr8_hap1_hsa10	4873584	4875506	Collapse T-656	-	spacer	1	1
Chimpanzee	CM054442.2	chr8_hap1_hsa10	4879341	4879623	Collapse T-657	-	spacer	1	1
Chimpanzee	CM054442.2	chr8_hap1_hsa10	5525169	5527167	Collapse T-658	-	spacer	1	1
Chimpanzee	CM054442.2	chr8_hap1_hsa10	5826014	5826104	Collapse T-659	+	spacer	2	1
Chimpanzee	CM054442.2	chr8_hap1_hsa10	5832725	5834536	Collapse T-660	-	spacer	1	1
Chimpanzee	CM054442.2	chr8_hap1_hsa10	5837421	5837758	Collapse T-661	+	spacer	1	1
Chimpanzee	CM054442.2	chr8_hap1_hsa10	6463817	6464326	Collapse T-662	-	spacer	1	1
Chimpanzee	CM054442.2	chr8_hap1_hsa10	6644015	6644353	Collapse T-663	+	spacer	1	1
Chimpanzee	CM054442.2	chr8_hap1_hsa10	7001246	7003029	Collapse T-664	-	spacer	3	1
Chimpanzee	CM054442.2	chr8_hap1_hsa10	7015249	7017222	Collapse T-665	+	spacer	1	1
Chimpanzee	CM054442.2	chr8_hap1_hsa10	7262397	7262558	Collapse T-666	-	spacer	1	1
Chimpanzee	CM054442.2	chr8_hap1_hsa10	7275698	7276310	Collapse T-667	+	spacer	1	1
Chimpanzee	CM054442.2	chr8_hap1_hsa10	7852725	7852807	Collapse T-668	-	spacer	1	1
Chimpanzee	CM054442.2	chr8_hap1_hsa10	9003241	9003642	Collapse T-669	+	spacer	1	1
Chimpanzee	CM054442.2	chr8_hap1_hsa10	10184516	10184649	Collapse T-670	+	spacer	1	1
Chimpanzee	CM054442.2	chr8_hap1_hsa10	9556349	9558265	Collapse T-671	-	spacer	1	1
Chimpanzee	CM054442.2	chr8_hap1_hsa10	10197025	10197842	Collapse T-672	-	spacer	1	1
Chimpanzee	CM054442.2	chr8_hap1_hsa10	10202778	10203060	Collapse T-673	-	spacer	1	1
Chimpanzee	CM054442.2	chr8_hap1_hsa10	11319271	11319450	Collapse T-674	-	spacer	1	1
Chimpanzee	CM054442.2	chr8_hap1_hsa10	11321100	11325615	Collapse T-675	-	spacer	1	1
Chimpanzee	CM054442.2	chr8_hap1_hsa10	10190284	10190425	Collapse T-676	+	spacer	1	1
Chimpanzee	CM054442.2	chr8_hap1_hsa10	11566358	11566591	Collapse T-677	+	spacer	1	1
Chimpanzee	CM054442.2	chr8_hap1_hsa10	11384460	11384708	Collapse T-678	-	spacer	1	1
Chimpanzee	CM054442.2	chr8_hap1_hsa10	12179488	12181782	Collapse T-679	-	spacer	1	1
Chimpanzee	CM054442.2	chr8_hap1_hsa10	12649689	12667567	Collapse T-680	-	spacer	1	2
Chimpanzee	CM054442.2	chr8_hap1_hsa10	12654167	12657146	Collapse T-681	-	spacer	4	1
Chimpanzee	CM054442.2	chr8_hap1_hsa10	12661574	12661832	Collapse T-682	-	spacer	1	1
Gorilla	CM055449.2	chr3_pat_hsa4	212624389	212656700	Collapse T-1	-	pCht	1	10
Gorilla	CM055449.2	chr3_pat_hsa4	215250922	215252789	Collapse T-2	-	pCht	1	1
Gorilla	CM055450.2	chr4_pat_hsa17x5	905603	914123	Collapse T-3	+	pCht	1	4
Gorilla	CM055450.2	chr4_pat_hsa17x5	2742478	2753206	Collapse T-4	-	pCht	1	2
Gorilla	CM055450.2	chr4_pat_hsa17x5	193973256	193979329	Collapse T-5	+	pCht	1	1
Gorilla	CM055451.2	chr5_mat_hsa6	26392	27188	Collapse T-6	+	pCht	1	1
Gorilla	CM055451.2	chr5_mat_hsa6	6057266	6202883	Collapse T-7	-	pCht	1	3
Gorilla	CM055451.2	chr5_mat_hsa6	8506496	8524077	Collapse T-8	-	pCht	1	3
Gorilla	CM055451.2	chr5_mat_hsa6	8854507	8916987	Collapse T-9	-	pCht	1	3
Gorilla	CM055451.2	chr5_mat_hsa6	8855273	9098254	Collapse T-10	-	pCht	1	4
Gorilla	CM055451.2	chr5_mat_hsa6	10691844	10693779	Collapse T-11	-	pCht	1	1
Gorilla	CM055451.2	chr5_mat_hsa6	13667652	13854806	Collapse T-12	-	pCht	1	2
Gorilla	CM055451.2	chr5_mat_hsa6	15491170	15501889	Collapse T-13	-	pCht	1	3
Gorilla	CM055451.2	chr5_mat_hsa6	16416807	16506786	Collapse T-14	-	pCht	1	2
Gorilla	CM055451.2	chr5_mat_hsa6	196617938	196633128	Collapse T-15	+	pCht	1	4
Gorilla	CM055451.2	chr5_mat_hsa6	196709953	196752899	Collapse T-16	+	pCht	1	11
Gorilla	CM055451.2	chr5_mat_hsa6	197706307	197724189	Collapse T-17	+	pCht	1	2
Gorilla	CM055451.2	chr5_mat_hsa6	198718034	198738071	Collapse T-18	+	pCht	1	3
Gorilla	CM055451.2	chr5_mat_hsa6	198988120	199190485	Collapse T-19	-	pCht	1	5
Gorilla	CM055451.2	chr5_mat_hsa6	199152902	199155620	Collapse T-20	-	pCht	1	2
Gorilla	CM055452.2	chr6_mat_hsa7	1874347	1954050	Collapse T-21	-	pCht	1	2
Gorilla	CM055452.2	chr6_mat_hsa7	6421922	6438170	Collapse T-22	-	pCht	1	3
Gorilla	CM055452.2	chr6_mat_hsa7	6477872	6562027	Collapse T-23	+	pCht	2	8
Gorilla	CM055453.2	chr7_pat_hsa8	309572	510851	Collapse T-24	-	pCht	1	3
Gorilla	CM055453.2	chr7_pat_hsa8	1673551	1688078	Collapse T-25	+	pCht	2	3
Gorilla	CM055453.2	chr7_pat_hsa8	2132097	2153673	Collapse T-26	-	pCht	3	3
Gorilla	CM055453.2	chr7_pat_hsa8	151752437	151787816	Collapse T-27	+	pCht	1	6
Gorilla	CM055453.2	chr7_pat_hsa8	155018089	155019366	Collapse T-28	+	pCht	1	2
Gorilla	CM068950.1	chr2_pat_hsa3	116581	124520	Collapse T-29	+	pCht	1	5
Gorilla	CM055453.2	chr7_pat_hsa8	156138991	156164910	Collapse T-30	-	pCht	1	2
Gorilla	CM068950.1	chr2_pat_hsa3	356249	359675	Collapse T-31	+	pCht	1	1
Gorilla	CM055454.2	chr8_pat_hsa10	2832392	2858938	Collapse T-32	-	pCht	1	2
Gorilla	CM055454.2	chr8_pat_hsa10	3152017	3153229	Collapse T-33	-	pCht	1	1
Gorilla	CM055454.2	chr8_pat_hsa10	4721187	4722686	Collapse T-34	-	pCht	1	2
Gorilla	CM055454.2	chr8_pat_hsa10	5327871	5329362	Collapse T-35	-	pCht	1	1
Gorilla	CM055454.2	chr8_pat_hsa10	7442330	7480274	Collapse T-36	-	pCht	1	3
Gorilla	CM055454.2	chr8_pat_hsa10	7283794	7287523	Collapse T-37	+	pCht	1	3
Gorilla	CM055454.2	chr8_pat_hsa10	148115081	148158422	Collapse T-38	-	pCht	1	2
Gorilla	CM055455.2	chr9_pat_hsa11	946728	1033434	Collapse T-39	+	pCht	2	6
Gorilla	CM055455.2	chr9_pat_hsa11	953172	954826	Collapse T-40	+	pCht	1	2
Gorilla	CM055455.2	chr9_pat_hsa11	3809055	3815762	Collapse T-41	+	pCht	1	2
Gorilla	CM055455.2	chr9_pat_hsa11	144639796	144640803	Collapse T-42	+	pCht	1	2
Gorilla	CM068950.1	chr2_pat_hsa3	5492008	5628241	Collapse T-43	-	pCht	1	2
Gorilla	CM055455.2	chr9_pat_hsa11	144698429	144699921	Collapse T-44	+	pCht	1	1
Gorilla	CM055455.2	chr9_pat_hsa11	144312709	144408110	Collapse T-45	-	pCht	1	4
Gorilla	CM055455.2	chr9_pat_hsa11	144712185	144713594	Collapse T-46	+	pCht	1	1
Gorilla	CM055455.2	chr9_pat_hsa11	146484327	146741139	Collapse T-47	-	pCht	1	3
Gorilla	CM055456.2	chr10_mat_hsa12	3010867	3063516	Collapse T-48	+	pCht	1	4
Gorilla	CM055456.2	chr10_mat_hsa12	4852502	4854062	Collapse T-49	+	pCht	2	1
Gorilla	CM055456.2	chr10_mat_hsa12	5796219	5813201	Collapse T-50	-	pCht	1	2
Gorilla	CM055456.2	chr10_mat_hsa12	9588107	9608998	Collapse T-51	+	pCht	1	2
Gorilla	CM068950.1	chr2_pat_hsa3	8265444	8267011	Collapse T-52	-	pCht	1	1
Gorilla	CM055456.2	chr10_mat_hsa12	12530019	12552606	Collapse T-53	+	pCht	1	2
Gorilla	CM055456.2	chr10_mat_hsa12	15494379	15495629	Collapse T-54	-	pCht	2	1
Gorilla	CM055456.2	chr10_mat_hsa12	150349223	150359747	Collapse T-55	+	pCht	1	2
Gorilla	CM055456.2	chr10_mat_hsa12	150369315	150372396	Collapse T-56	+	pCht	1	1
Gorilla	CM055456.2	chr10_mat_hsa12	152393003	152394416	Collapse T-57	-	pCht	1	1
Gorilla	CM055457.2	chr11_mat_hsa2b	10541293	10552780	Collapse T-58	+	pCht	1	4
Gorilla	CM055457.2	chr11_mat_hsa2b	14148700	14212674	Collapse T-59	+	pCht	2	4
Gorilla	CM055457.2	chr11_mat_hsa2b	145496171	145647852	Collapse T-60	+	pCht	1	2
Gorilla	CM055457.2	chr11_mat_hsa2b	146041827	146084374	Collapse T-61	+	pCht	2	5
Gorilla	CM055457.2	chr11_mat_hsa2b	147221361	147344839	Collapse T-62	-	pCht	3	3
Gorilla	CM055457.2	chr11_mat_hsa2b	147381874	147383080	Collapse T-63	-	pCht	1	1
Gorilla	CM055457.2	chr11_mat_hsa2b	149307117	149317053	Collapse T-64	+	pCht	1	4
Gorilla	CM055461.2	chr15_pat_hsa14	2663425	3105616	Collapse T-65	+	pCht	1	7
Gorilla	CM055461.2	chr15_pat_hsa14	9199783	9200757	Collapse T-66	-	pCht	1	1
Gorilla	CM055462.2	chr16_pat_hsa15	105332029	105335112	Collapse T-67	+	pCht	1	2
Gorilla	CM055462.2	chr16_pat_hsa15	105646517	105836168	Collapse T-68	+	pCht	1	4
Gorilla	CM055462.2	chr16_pat_hsa15	105867033	106057512	Collapse T-69	+	pCht	1	3
Gorilla	CM055462.2	chr16_pat_hsa15	107305908	107447598	Collapse T-70	-	pCht	1	4
Gorilla	CM055462.2	chr16_pat_hsa15	107698583	107700699	Collapse T-71	-	pCht	1	2
Gorilla	CM055462.2	chr16_pat_hsa15	107862970	107863914	Collapse T-72	-	pCht	1	1
Gorilla	CM055463.2	chr17_mat_hsa18	112549117	112620791	Collapse T-73	-	pCht	1	7
Gorilla	CM055463.2	chr17_mat_hsa18	115007491	115130109	Collapse T-74	+	pCht	1	4
Gorilla	CM055463.2	chr17_mat_hsa18	115784698	115785919	Collapse T-75	-	pCht	1	1
Gorilla	CM055463.2	chr17_mat_hsa18	115803612	115805589	Collapse T-76	-	pCht	1	1
Gorilla	CM055464.2	chr18_pat_hsa16	1417606	1547762	Collapse T-77	+	pCht	1	6
Gorilla	CM055464.2	chr18_pat_hsa16	2833766	2842525	Collapse T-78	+	pCht	1	3
Gorilla	CM055464.2	chr18_pat_hsa16	121857776	121876892	Collapse T-79	+	pCht	1	3
Gorilla	CM055464.2	chr18_pat_hsa16	121858700	121882661	Collapse T-80	+	pCht	1	2
Gorilla	CM055464.2	chr18_pat_hsa16	121865632	121877460	Collapse T-81	+	pCht	1	4
Gorilla	CM055464.2	chr18_pat_hsa16	121895082	121993935	Collapse T-82	+	pCht	1	2
Gorilla	CM055464.2	chr18_pat_hsa16	129147711	129148589	Collapse T-83	-	pCht	1	1
Gorilla	CM055465.2	chr19_pat_hsa5x17	100584	103042	Collapse T-84	+	pCht	1	1
Gorilla	CM055465.2	chr19_pat_hsa5x17	875645	897030	Collapse T-85	-	pCht	1	2
Gorilla	CM055465.2	chr19_pat_hsa5x17	6621742	6624824	Collapse T-86	+	pCht	1	1
Gorilla	CM055465.2	chr19_pat_hsa5x17	10713628	10908328	Collapse T-87	-	pCht	1	6
Gorilla	CM055465.2	chr19_pat_hsa5x17	11128618	11133363	Collapse T-88	-	pCht	1	2
Gorilla	CM055465.2	chr19_pat_hsa5x17	13377366	13541474	Collapse T-89	-	pCht	1	3
Gorilla	CM055465.2	chr19_pat_hsa5x17	13384919	13548248	Collapse T-90	-	pCht	1	2
Gorilla	CM055465.2	chr19_pat_hsa5x17	115728378	115861737	Collapse T-91	-	pCht	1	2
Gorilla	CM055466.2	chr20_mat_hsa19	1203121	1375546	Collapse T-92	+	pCht	2	3
Gorilla	CM055466.2	chr20_mat_hsa19	3262007	3264652	Collapse T-93	-	pCht	1	3
Gorilla	CM055466.2	chr20_mat_hsa19	76239836	76240956	Collapse T-94	+	pCht	1	1
Gorilla	CM055466.2	chr20_mat_hsa19	76247292	76263256	Collapse T-95	+	pCht	1	3
Gorilla	CM055466.2	chr20_mat_hsa19	76519940	76625923	Collapse T-96	+	pCht	1	3
Gorilla	CM055466.2	chr20_mat_hsa19	77202269	77205292	Collapse T-97	+	pCht	3	2
Gorilla	CM055467.2	chr21_pat_hsa20	7029143	7057140	Collapse T-98	-	pCht	1	3
Gorilla	CM055467.2	chr21_pat_hsa20	9890376	9953558	Collapse T-99	-	pCht	4	2
Gorilla	CM055467.2	chr21_pat_hsa20	9890637	9953468	Collapse T-100	-	pCht	11	2
Gorilla	CM055467.2	chr21_pat_hsa20	79743344	79755274	Collapse T-101	+	pCht	1	2
Gorilla	CM055467.2	chr21_pat_hsa20	82374427	82395049	Collapse T-102	-	pCht	1	3
Gorilla	CM055468.2	chr22_mat_hsa21	54264071	54276602	Collapse T-103	+	pCht	2	3
Gorilla	CM055468.2	chr22_mat_hsa21	57119365	57125473	Collapse T-104	-	pCht	1	2
Gorilla	CM055468.2	chr22_mat_hsa21	57708997	57752689	Collapse T-105	+	pCht	2	4
Gorilla	CM068951.1	chr23_mat_hsa22	48913317	49276435	Collapse T-106	+	pCht	1	5
Gorilla	CM068951.1	chr23_mat_hsa22	49160334	49172692	Collapse T-107	+	pCht	1	6
Gorilla	CM068951.1	chr23_mat_hsa22	49198914	49200388	Collapse T-108	+	pCht	1	1
Gorilla	CM068951.1	chr23_mat_hsa22	54728809	54732853	Collapse T-109	-	pCht	1	1
Gorilla	CM055469.2	chrX_mat_hsaX	169899927	169902968	Collapse T-110	-	pCht	1	3
Gorilla	CM068950.1	chr2_pat_hsa3	215240198	215240884	Collapse T-111	-	pCht	1	1
Gorilla	CM055449.2	chr3_pat_hsa4	4945260	4946351	Collapse T-112	-	pCht	1	2
Gorilla	CM055449.2	chr3_pat_hsa4	4507854	4509265	Collapse T-113	+	pCht	1	2
Gorilla	CM055449.2	chr3_pat_hsa4	5048147	5071041	Collapse T-114	+	pCht	2	4
Gorilla	CM055449.2	chr3_pat_hsa4	5057285	5058696	Collapse T-115	+	pCht	1	2
Gorilla	CM055449.2	chr3_pat_hsa4	6105261	6106218	Collapse T-116	+	pCht	1	1
Gorilla	CM055449.2	chr3_pat_hsa4	6700142	7104051	Collapse T-117	+	pCht	1	3
Gorilla	CM055449.2	chr3_pat_hsa4	6890130	7055143	Collapse T-118	+	pCht	1	3
Gorilla	CM055446.2	chr1_pat_hsa1	1118874	1122947	Collapse T-119	+	spacer	2	1
Gorilla	CM055446.2	chr1_pat_hsa1	2477646	2478360	Collapse T-120	+	spacer	1	1
Gorilla	CM055446.2	chr1_pat_hsa1	2489694	2491296	Collapse T-121	+	spacer	1	1
Gorilla	CM055449.2	chr3_pat_hsa4	212510724	212511392	Collapse T-122	-	spacer	1	1
Gorilla	CM055449.2	chr3_pat_hsa4	212505769	212506463	Collapse T-123	+	spacer	1	1
Gorilla	CM055449.2	chr3_pat_hsa4	212505831	212506730	Collapse T-124	+	spacer	2	1
Gorilla	CM055449.2	chr3_pat_hsa4	212506271	212507394	Collapse T-125	+	spacer	3	1
Gorilla	CM055449.2	chr3_pat_hsa4	212506478	212507549	Collapse T-126	+	spacer	4	1
Gorilla	CM055449.2	chr3_pat_hsa4	212506689	212507910	Collapse T-127	+	spacer	1	1
Gorilla	CM055449.2	chr3_pat_hsa4	212849255	212849955	Collapse T-128	+	spacer	1	1
Gorilla	CM055449.2	chr3_pat_hsa4	212863287	212866130	Collapse T-129	-	spacer	1	1
Gorilla	CM055449.2	chr3_pat_hsa4	212864780	212866095	Collapse T-130	-	spacer	1	1
Gorilla	CM055449.2	chr3_pat_hsa4	212869711	212871113	Collapse T-131	-	spacer	1	1
Gorilla	CM055449.2	chr3_pat_hsa4	212863509	212864509	Collapse T-132	+	spacer	2	1
Gorilla	CM055450.2	chr4_pat_hsa17x5	776209	777753	Collapse T-133	+	spacer	1	1
Gorilla	CM055450.2	chr4_pat_hsa17x5	789499	790535	Collapse T-134	-	spacer	1	1
Gorilla	CM055450.2	chr4_pat_hsa17x5	789679	791145	Collapse T-135	-	spacer	3	1
Gorilla	CM055450.2	chr4_pat_hsa17x5	790124	791534	Collapse T-136	-	spacer	3	1
Gorilla	CM055450.2	chr4_pat_hsa17x5	1163901	1165085	Collapse T-137	-	spacer	1	1
Gorilla	CM055450.2	chr4_pat_hsa17x5	1165566	1166408	Collapse T-138	-	spacer	1	1
Gorilla	CM055450.2	chr4_pat_hsa17x5	1167808	1169471	Collapse T-139	-	spacer	4	1
Gorilla	CM055450.2	chr4_pat_hsa17x5	1168029	1169933	Collapse T-140	-	spacer	2	1
Gorilla	CM055450.2	chr4_pat_hsa17x5	1395711	1396260	Collapse T-141	-	spacer	1	1
Gorilla	CM055450.2	chr4_pat_hsa17x5	1154617	1156103	Collapse T-142	+	spacer	1	1
Gorilla	CM055450.2	chr4_pat_hsa17x5	1403018	1404022	Collapse T-143	-	spacer	1	1
Gorilla	CM055450.2	chr4_pat_hsa17x5	1403241	1404745	Collapse T-144	-	spacer	6	1
Gorilla	CM055450.2	chr4_pat_hsa17x5	1403684	1404822	Collapse T-145	-	spacer	2	1
Gorilla	CM055450.2	chr4_pat_hsa17x5	1500378	1501204	Collapse T-146	+	spacer	1	1
Gorilla	CM055450.2	chr4_pat_hsa17x5	1512903	1514239	Collapse T-147	-	spacer	1	1
Gorilla	CM055450.2	chr4_pat_hsa17x5	1513130	1514572	Collapse T-148	-	spacer	3	1
Gorilla	CM055450.2	chr4_pat_hsa17x5	1517696	1520347	Collapse T-149	+	spacer	1	1
Gorilla	CM055450.2	chr4_pat_hsa17x5	2012228	2013647	Collapse T-150	-	spacer	1	1
Gorilla	CM055450.2	chr4_pat_hsa17x5	2029374	2031077	Collapse T-151	-	spacer	2	1
Gorilla	CM055450.2	chr4_pat_hsa17x5	2029641	2031107	Collapse T-152	-	spacer	5	1
Gorilla	CM055450.2	chr4_pat_hsa17x5	2089905	2090924	Collapse T-153	-	spacer	1	1
Gorilla	CM055446.2	chr1_pat_hsa1	2488888	2489966	Collapse T-154	-	spacer	1	1
Gorilla	CM055450.2	chr4_pat_hsa17x5	2015592	2017715	Collapse T-155	+	spacer	3	1
Gorilla	CM055450.2	chr4_pat_hsa17x5	2098550	2099370	Collapse T-156	+	spacer	1	1
Gorilla	CM055450.2	chr4_pat_hsa17x5	2092154	2092879	Collapse T-157	-	spacer	1	1
Gorilla	CM055450.2	chr4_pat_hsa17x5	2101249	2102702	Collapse T-158	+	spacer	1	1
Gorilla	CM055450.2	chr4_pat_hsa17x5	2788633	2789611	Collapse T-159	-	spacer	1	1
Gorilla	CM055450.2	chr4_pat_hsa17x5	2781592	2784332	Collapse T-160	+	spacer	23	1
Gorilla	CM055450.2	chr4_pat_hsa17x5	2796391	2798512	Collapse T-161	+	spacer	2	1
Gorilla	CM055450.2	chr4_pat_hsa17x5	2802196	2803375	Collapse T-162	+	spacer	1	1
Gorilla	CM055450.2	chr4_pat_hsa17x5	2793912	2794812	Collapse T-163	-	spacer	1	1
Gorilla	CM055450.2	chr4_pat_hsa17x5	3249956	3250859	Collapse T-164	-	spacer	1	1
Gorilla	CM055450.2	chr4_pat_hsa17x5	3249562	3253243	Collapse T-165	+	spacer	1	1
Gorilla	CM055450.2	chr4_pat_hsa17x5	3250666	3251609	Collapse T-166	+	spacer	1	1
Gorilla	CM055450.2	chr4_pat_hsa17x5	3252178	3253102	Collapse T-167	+	spacer	1	1
Gorilla	CM055450.2	chr4_pat_hsa17x5	3251297	3252850	Collapse T-168	-	spacer	1	1
Gorilla	CM055450.2	chr4_pat_hsa17x5	3251880	3255029	Collapse T-169	-	spacer	3	1
Gorilla	CM055450.2	chr4_pat_hsa17x5	3253331	3255032	Collapse T-170	-	spacer	1	1
Gorilla	CM055450.2	chr4_pat_hsa17x5	3256026	3258319	Collapse T-171	+	spacer	4	1
Gorilla	CM055450.2	chr4_pat_hsa17x5	3260634	3261177	Collapse T-172	+	spacer	1	1
Gorilla	CM055450.2	chr4_pat_hsa17x5	3256389	3257603	Collapse T-173	-	spacer	1	1
Gorilla	CM055450.2	chr4_pat_hsa17x5	3462985	3464828	Collapse T-174	-	spacer	1	1
Gorilla	CM055450.2	chr4_pat_hsa17x5	3454307	3456620	Collapse T-175	+	spacer	1	1
Gorilla	CM055450.2	chr4_pat_hsa17x5	3467478	3469012	Collapse T-176	-	spacer	2	1
Gorilla	CM055450.2	chr4_pat_hsa17x5	3473018	3475690	Collapse T-177	+	spacer	3	1
Gorilla	CM055450.2	chr4_pat_hsa17x5	4015629	4016708	Collapse T-178	-	spacer	1	1
Gorilla	CM055450.2	chr4_pat_hsa17x5	4025358	4026354	Collapse T-179	-	spacer	1	1
Gorilla	CM055450.2	chr4_pat_hsa17x5	4019457	4020964	Collapse T-180	+	spacer	1	1
Gorilla	CM055450.2	chr4_pat_hsa17x5	4038600	4040104	Collapse T-181	+	spacer	1	1
Gorilla	CM055450.2	chr4_pat_hsa17x5	4042907	4043435	Collapse T-182	+	spacer	1	1
Gorilla	CM055450.2	chr4_pat_hsa17x5	4153990	4156017	Collapse T-183	+	spacer	1	1
Gorilla	CM055450.2	chr4_pat_hsa17x5	4033333	4034106	Collapse T-184	-	spacer	1	1
Gorilla	CM055450.2	chr4_pat_hsa17x5	4159988	4160734	Collapse T-185	+	spacer	1	1
Gorilla	CM055450.2	chr4_pat_hsa17x5	4172787	4175164	Collapse T-186	+	spacer	6	1
Gorilla	CM055450.2	chr4_pat_hsa17x5	4634271	4635695	Collapse T-187	+	spacer	2	1
Gorilla	CM055450.2	chr4_pat_hsa17x5	4647467	4650125	Collapse T-188	+	spacer	1	1
Gorilla	CM055450.2	chr4_pat_hsa17x5	4168260	4169189	Collapse T-189	-	spacer	2	1
Gorilla	CM055450.2	chr4_pat_hsa17x5	4168394	4169225	Collapse T-190	-	spacer	1	1
Gorilla	CM055450.2	chr4_pat_hsa17x5	5367054	5368051	Collapse T-191	+	spacer	1	1
Gorilla	CM055450.2	chr4_pat_hsa17x5	5376525	5377615	Collapse T-192	+	spacer	1	1
Gorilla	CM055450.2	chr4_pat_hsa17x5	5375272	5377822	Collapse T-193	-	spacer	1	1
Gorilla	CM055450.2	chr4_pat_hsa17x5	5981531	5983164	Collapse T-194	-	spacer	1	1
Gorilla	CM055450.2	chr4_pat_hsa17x5	5985903	5986680	Collapse T-195	-	spacer	1	1
Gorilla	CM055450.2	chr4_pat_hsa17x5	5980145	5981260	Collapse T-196	+	spacer	1	1
Gorilla	CM055450.2	chr4_pat_hsa17x5	5989186	5990825	Collapse T-197	+	spacer	2	1
Gorilla	CM055450.2	chr4_pat_hsa17x5	5988474	5993341	Collapse T-198	-	spacer	5	1
Gorilla	CM055450.2	chr4_pat_hsa17x5	5993278	5994677	Collapse T-199	-	spacer	2	1
Gorilla	CM055450.2	chr4_pat_hsa17x5	5997869	5998763	Collapse T-200	-	spacer	1	1
Gorilla	CM055450.2	chr4_pat_hsa17x5	5993096	5995687	Collapse T-201	+	spacer	3	1
Gorilla	CM055450.2	chr4_pat_hsa17x5	6249467	6251872	Collapse T-202	+	spacer	1	1
Gorilla	CM055450.2	chr4_pat_hsa17x5	6253236	6256734	Collapse T-203	+	spacer	3	1
Gorilla	CM055450.2	chr4_pat_hsa17x5	6241535	6243703	Collapse T-204	-	spacer	1	1
Gorilla	CM055450.2	chr4_pat_hsa17x5	6297715	6299098	Collapse T-205	-	spacer	2	1
Gorilla	CM055450.2	chr4_pat_hsa17x5	6302806	6303747	Collapse T-206	-	spacer	1	1
Gorilla	CM055450.2	chr4_pat_hsa17x5	6304974	6306418	Collapse T-207	-	spacer	1	1
Gorilla	CM055450.2	chr4_pat_hsa17x5	6305241	6306747	Collapse T-208	-	spacer	3	1
Gorilla	CM055450.2	chr4_pat_hsa17x5	6305684	6309054	Collapse T-209	-	spacer	1	1
Gorilla	CM055450.2	chr4_pat_hsa17x5	6568108	6568842	Collapse T-210	-	spacer	1	1
Gorilla	CM055450.2	chr4_pat_hsa17x5	6297082	6298027	Collapse T-211	+	spacer	1	1
Gorilla	CM055450.2	chr4_pat_hsa17x5	6580468	6582851	Collapse T-212	+	spacer	5	1
Gorilla	CM055450.2	chr4_pat_hsa17x5	6775127	6776189	Collapse T-213	+	spacer	1	1
Gorilla	CM055450.2	chr4_pat_hsa17x5	6575636	6576869	Collapse T-214	-	spacer	1	1
Gorilla	CM055450.2	chr4_pat_hsa17x5	6784141	6785311	Collapse T-215	+	spacer	1	1
Gorilla	CM055450.2	chr4_pat_hsa17x5	6797880	6799745	Collapse T-216	+	spacer	5	1
Gorilla	CM055450.2	chr4_pat_hsa17x5	6801208	6803068	Collapse T-217	+	spacer	1	1
Gorilla	CM055450.2	chr4_pat_hsa17x5	6852494	6855566	Collapse T-218	+	spacer	3	1
Gorilla	CM055450.2	chr4_pat_hsa17x5	6859095	6860255	Collapse T-219	+	spacer	1	1
Gorilla	CM055450.2	chr4_pat_hsa17x5	6790279	6791535	Collapse T-220	-	spacer	1	1
Gorilla	CM055450.2	chr4_pat_hsa17x5	6791446	6793185	Collapse T-221	-	spacer	2	1
Gorilla	CM055450.2	chr4_pat_hsa17x5	6792528	6793204	Collapse T-222	-	spacer	1	1
Gorilla	CM055450.2	chr4_pat_hsa17x5	7295478	7296287	Collapse T-223	+	spacer	1	1
Gorilla	CM055450.2	chr4_pat_hsa17x5	7298922	7300626	Collapse T-224	+	spacer	1	1
Gorilla	CM055450.2	chr4_pat_hsa17x5	7318328	7319822	Collapse T-225	+	spacer	1	1
Gorilla	CM055450.2	chr4_pat_hsa17x5	7295958	7312851	Collapse T-226	-	spacer	1	2
Gorilla	CM055450.2	chr4_pat_hsa17x5	7310034	7311691	Collapse T-227	-	spacer	2	1
Gorilla	CM055450.2	chr4_pat_hsa17x5	7310170	7312907	Collapse T-228	-	spacer	4	1
Gorilla	CM055450.2	chr4_pat_hsa17x5	7312341	7313635	Collapse T-229	-	spacer	1	1
Gorilla	CM055450.2	chr4_pat_hsa17x5	7312608	7314940	Collapse T-230	-	spacer	1	1
Gorilla	CM055450.2	chr4_pat_hsa17x5	7313051	7314075	Collapse T-231	-	spacer	1	1
Gorilla	CM055450.2	chr4_pat_hsa17x5	7334489	7335565	Collapse T-232	+	spacer	2	1
Gorilla	CM055450.2	chr4_pat_hsa17x5	7355232	7359147	Collapse T-233	+	spacer	8	1
Gorilla	CM055450.2	chr4_pat_hsa17x5	7351934	7353057	Collapse T-234	-	spacer	1	1
Gorilla	CM055450.2	chr4_pat_hsa17x5	7727023	7727984	Collapse T-235	-	spacer	3	1
Gorilla	CM055450.2	chr4_pat_hsa17x5	7727244	7728027	Collapse T-236	-	spacer	1	1
Gorilla	CM055450.2	chr4_pat_hsa17x5	7884208	7885273	Collapse T-237	-	spacer	1	1
Gorilla	CM055450.2	chr4_pat_hsa17x5	7900987	7904361	Collapse T-238	-	spacer	4	1
Gorilla	CM055450.2	chr4_pat_hsa17x5	8094920	8098294	Collapse T-239	-	spacer	5	1
Gorilla	CM055450.2	chr4_pat_hsa17x5	7907331	7908203	Collapse T-240	+	spacer	1	1
Gorilla	CM055446.2	chr1_pat_hsa1	2662853	2664276	Collapse T-241	+	spacer	4	1
Gorilla	CM055446.2	chr1_pat_hsa1	2676499	2678533	Collapse T-242	+	spacer	27	1
Gorilla	CM055446.2	chr1_pat_hsa1	2677096	2678366	Collapse T-243	+	spacer	1	1
Gorilla	CM055446.2	chr1_pat_hsa1	2669225	2670734	Collapse T-244	-	spacer	1	1
Gorilla	CM055450.2	chr4_pat_hsa17x5	185466649	185467762	Collapse T-245	-	spacer	1	1
Gorilla	CM055450.2	chr4_pat_hsa17x5	185521726	185524950	Collapse T-246	-	spacer	2	1
Gorilla	CM055450.2	chr4_pat_hsa17x5	185526591	185528149	Collapse T-247	-	spacer	2	1
Gorilla	CM055450.2	chr4_pat_hsa17x5	185536169	185536710	Collapse T-248	-	spacer	1	1
Gorilla	CM055450.2	chr4_pat_hsa17x5	185460357	185462348	Collapse T-249	+	spacer	1	1
Gorilla	CM055450.2	chr4_pat_hsa17x5	185535244	185536480	Collapse T-250	+	spacer	1	1
Gorilla	CM055450.2	chr4_pat_hsa17x5	185884193	185885535	Collapse T-251	-	spacer	2	1
Gorilla	CM055450.2	chr4_pat_hsa17x5	185891856	185893373	Collapse T-252	-	spacer	2	1
Gorilla	CM055450.2	chr4_pat_hsa17x5	185896928	185898161	Collapse T-253	-	spacer	1	1
Gorilla	CM055450.2	chr4_pat_hsa17x5	185898562	185899230	Collapse T-254	-	spacer	1	1
Gorilla	CM055450.2	chr4_pat_hsa17x5	185903266	185904905	Collapse T-255	-	spacer	2	1
Gorilla	CM055450.2	chr4_pat_hsa17x5	185876516	185908760	Collapse T-256	+	spacer	1	2
Gorilla	CM055450.2	chr4_pat_hsa17x5	185890229	185891348	Collapse T-257	+	spacer	1	1
Gorilla	CM055450.2	chr4_pat_hsa17x5	185891598	185892430	Collapse T-258	+	spacer	1	1
Gorilla	CM055450.2	chr4_pat_hsa17x5	186928252	186929430	Collapse T-259	+	spacer	1	1
Gorilla	CM055450.2	chr4_pat_hsa17x5	186922275	186923252	Collapse T-260	-	spacer	1	1
Gorilla	CM055450.2	chr4_pat_hsa17x5	186934723	186936956	Collapse T-261	+	spacer	1	1
Gorilla	CM055450.2	chr4_pat_hsa17x5	186941348	186943005	Collapse T-262	-	spacer	2	1
Gorilla	CM055450.2	chr4_pat_hsa17x5	188193059	188194882	Collapse T-263	-	spacer	10	1
Gorilla	CM055450.2	chr4_pat_hsa17x5	188198088	188199779	Collapse T-264	-	spacer	1	1
Gorilla	CM055450.2	chr4_pat_hsa17x5	188205038	188205862	Collapse T-265	-	spacer	1	1
Gorilla	CM055450.2	chr4_pat_hsa17x5	188206536	188207770	Collapse T-266	-	spacer	1	1
Gorilla	CM055450.2	chr4_pat_hsa17x5	188211071	188213399	Collapse T-267	-	spacer	1	1
Gorilla	CM055450.2	chr4_pat_hsa17x5	188215574	188216637	Collapse T-268	-	spacer	1	1
Gorilla	CM055450.2	chr4_pat_hsa17x5	188234110	188235140	Collapse T-269	-	spacer	1	1
Gorilla	CM055450.2	chr4_pat_hsa17x5	188170600	188238121	Collapse T-270	+	spacer	1	2
Gorilla	CM055450.2	chr4_pat_hsa17x5	188234184	188235847	Collapse T-271	+	spacer	1	1
Gorilla	CM055450.2	chr4_pat_hsa17x5	188237602	188240612	Collapse T-272	+	spacer	1	2
Gorilla	CM055450.2	chr4_pat_hsa17x5	188170659	188239574	Collapse T-273	+	spacer	1	3
Gorilla	CM055450.2	chr4_pat_hsa17x5	188187473	188192007	Collapse T-274	+	spacer	1	2
Gorilla	CM055450.2	chr4_pat_hsa17x5	188198645	188200274	Collapse T-275	+	spacer	2	1
Gorilla	CM055450.2	chr4_pat_hsa17x5	188199734	188200541	Collapse T-276	+	spacer	1	1
Gorilla	CM055450.2	chr4_pat_hsa17x5	188205202	188206019	Collapse T-277	+	spacer	1	1
Gorilla	CM055450.2	chr4_pat_hsa17x5	188205304	188206848	Collapse T-278	+	spacer	2	1
Gorilla	CM055450.2	chr4_pat_hsa17x5	188231993	188233863	Collapse T-279	+	spacer	1	1
Gorilla	CM055450.2	chr4_pat_hsa17x5	188232061	188233598	Collapse T-280	+	spacer	11	1
Gorilla	CM055450.2	chr4_pat_hsa17x5	188238352	188240030	Collapse T-281	-	spacer	2	1
Gorilla	CM055450.2	chr4_pat_hsa17x5	188247927	188249952	Collapse T-282	+	spacer	1	1
Gorilla	CM055450.2	chr4_pat_hsa17x5	188944094	188945818	Collapse T-283	+	spacer	1	1
Gorilla	CM055450.2	chr4_pat_hsa17x5	188952115	188952869	Collapse T-284	+	spacer	1	1
Gorilla	CM055450.2	chr4_pat_hsa17x5	188960245	188962324	Collapse T-285	+	spacer	2	1
Gorilla	CM055450.2	chr4_pat_hsa17x5	188960899	188962168	Collapse T-286	+	spacer	1	1
Gorilla	CM055450.2	chr4_pat_hsa17x5	188961348	188962549	Collapse T-287	+	spacer	1	1
Gorilla	CM055450.2	chr4_pat_hsa17x5	188937668	188938528	Collapse T-288	-	spacer	1	1
Gorilla	CM055450.2	chr4_pat_hsa17x5	189528590	189529315	Collapse T-289	-	spacer	1	1
Gorilla	CM055450.2	chr4_pat_hsa17x5	189533281	189536380	Collapse T-290	-	spacer	1	1
Gorilla	CM055450.2	chr4_pat_hsa17x5	189479630	189480669	Collapse T-291	+	spacer	1	1
Gorilla	CM055450.2	chr4_pat_hsa17x5	189947884	189949075	Collapse T-292	-	spacer	1	1
Gorilla	CM055450.2	chr4_pat_hsa17x5	189957034	189958421	Collapse T-293	+	spacer	9	1
Gorilla	CM055450.2	chr4_pat_hsa17x5	189957184	189957978	Collapse T-294	+	spacer	1	1
Gorilla	CM055450.2	chr4_pat_hsa17x5	189964140	189964861	Collapse T-295	-	spacer	1	1
Gorilla	CM055450.2	chr4_pat_hsa17x5	189965429	189966291	Collapse T-296	+	spacer	2	1
Gorilla	CM055450.2	chr4_pat_hsa17x5	189970277	189972022	Collapse T-297	-	spacer	1	1
Gorilla	CM055450.2	chr4_pat_hsa17x5	190386393	190388455	Collapse T-298	-	spacer	1	1
Gorilla	CM055450.2	chr4_pat_hsa17x5	189974044	189975614	Collapse T-299	+	spacer	1	1
Gorilla	CM055450.2	chr4_pat_hsa17x5	190391255	190392588	Collapse T-300	-	spacer	1	1
Gorilla	CM055450.2	chr4_pat_hsa17x5	190391422	190393038	Collapse T-301	-	spacer	1	1
Gorilla	CM055450.2	chr4_pat_hsa17x5	190405469	190408078	Collapse T-302	-	spacer	2	1
Gorilla	CM055450.2	chr4_pat_hsa17x5	190513474	190515536	Collapse T-303	-	spacer	1	1
Gorilla	CM055450.2	chr4_pat_hsa17x5	190391299	190393606	Collapse T-304	+	spacer	7	1
Gorilla	CM055450.2	chr4_pat_hsa17x5	190518336	190520430	Collapse T-305	-	spacer	2	1
Gorilla	CM055450.2	chr4_pat_hsa17x5	190518951	190520908	Collapse T-306	+	spacer	1	1
Gorilla	CM055450.2	chr4_pat_hsa17x5	190519813	190520687	Collapse T-307	+	spacer	1	1
Gorilla	CM055450.2	chr4_pat_hsa17x5	190527901	190529283	Collapse T-308	-	spacer	1	1
Gorilla	CM055450.2	chr4_pat_hsa17x5	190528473	190530150	Collapse T-309	+	spacer	1	2
Gorilla	CM055450.2	chr4_pat_hsa17x5	190835329	190836463	Collapse T-310	+	spacer	1	1
Gorilla	CM055450.2	chr4_pat_hsa17x5	190831884	190832714	Collapse T-311	-	spacer	1	1
Gorilla	CM055450.2	chr4_pat_hsa17x5	190837291	190839270	Collapse T-312	+	spacer	4	1
Gorilla	CM055450.2	chr4_pat_hsa17x5	190837458	190839097	Collapse T-313	+	spacer	3	1
Gorilla	CM055450.2	chr4_pat_hsa17x5	190846311	190847734	Collapse T-314	-	spacer	1	1
Gorilla	CM055450.2	chr4_pat_hsa17x5	190850962	190854513	Collapse T-315	-	spacer	3	1
Gorilla	CM055450.2	chr4_pat_hsa17x5	191597645	191599471	Collapse T-316	-	spacer	2	1
Gorilla	CM055450.2	chr4_pat_hsa17x5	190846883	190848561	Collapse T-317	+	spacer	1	1
Gorilla	CM055450.2	chr4_pat_hsa17x5	191602507	191603910	Collapse T-318	-	spacer	1	1
Gorilla	CM055450.2	chr4_pat_hsa17x5	191809238	191810515	Collapse T-319	-	spacer	1	1
Gorilla	CM055450.2	chr4_pat_hsa17x5	191603196	191604858	Collapse T-320	+	spacer	2	1
Gorilla	CM055450.2	chr4_pat_hsa17x5	191603670	191605774	Collapse T-321	+	spacer	1	1
Gorilla	CM055450.2	chr4_pat_hsa17x5	191603673	191605945	Collapse T-322	+	spacer	3	1
Gorilla	CM055450.2	chr4_pat_hsa17x5	191822257	191822911	Collapse T-323	+	spacer	1	1
Gorilla	CM055450.2	chr4_pat_hsa17x5	191822684	191823777	Collapse T-324	+	spacer	1	1
Gorilla	CM055450.2	chr4_pat_hsa17x5	191815477	191817219	Collapse T-325	-	spacer	1	1
Gorilla	CM055450.2	chr4_pat_hsa17x5	191831533	191832255	Collapse T-326	-	spacer	1	1
Gorilla	CM055446.2	chr1_pat_hsa1	2681210	2683402	Collapse T-327	+	spacer	7	1
Gorilla	CM055450.2	chr4_pat_hsa17x5	191828271	191829392	Collapse T-328	+	spacer	1	1
Gorilla	CM055450.2	chr4_pat_hsa17x5	191995637	191996800	Collapse T-329	-	spacer	2	1
Gorilla	CM055450.2	chr4_pat_hsa17x5	191995907	191997988	Collapse T-330	+	spacer	2	1
Gorilla	CM055450.2	chr4_pat_hsa17x5	191996347	191998255	Collapse T-331	+	spacer	3	1
Gorilla	CM055450.2	chr4_pat_hsa17x5	191997859	191999075	Collapse T-332	+	spacer	2	1
Gorilla	CM055450.2	chr4_pat_hsa17x5	192009857	192011866	Collapse T-333	-	spacer	2	1
Gorilla	CM055450.2	chr4_pat_hsa17x5	192533260	192534957	Collapse T-334	-	spacer	2	1
Gorilla	CM055450.2	chr4_pat_hsa17x5	192527378	192528658	Collapse T-335	+	spacer	1	1
Gorilla	CM055450.2	chr4_pat_hsa17x5	192538122	192539831	Collapse T-336	-	spacer	2	1
Gorilla	CM055450.2	chr4_pat_hsa17x5	192552366	192556326	Collapse T-337	-	spacer	1	1
Gorilla	CM055450.2	chr4_pat_hsa17x5	192538651	192540473	Collapse T-338	+	spacer	2	1
Gorilla	CM055450.2	chr4_pat_hsa17x5	192539365	192540740	Collapse T-339	+	spacer	1	1
Gorilla	CM055450.2	chr4_pat_hsa17x5	193167448	193169236	Collapse T-340	-	spacer	1	1
Gorilla	CM055450.2	chr4_pat_hsa17x5	193172074	193174664	Collapse T-341	+	spacer	4	1
Gorilla	CM055450.2	chr4_pat_hsa17x5	193172313	193173845	Collapse T-342	-	spacer	1	1
Gorilla	CM055450.2	chr4_pat_hsa17x5	193181877	193184657	Collapse T-343	-	spacer	2	1
Gorilla	CM055450.2	chr4_pat_hsa17x5	193186576	193190411	Collapse T-344	-	spacer	1	1
Gorilla	CM055450.2	chr4_pat_hsa17x5	193176699	193192069	Collapse T-345	+	spacer	2	2
Gorilla	CM055450.2	chr4_pat_hsa17x5	193179357	193180156	Collapse T-346	+	spacer	1	1
Gorilla	CM055450.2	chr4_pat_hsa17x5	193458356	193463900	Collapse T-347	+	spacer	1	1
Gorilla	CM055450.2	chr4_pat_hsa17x5	193461528	193464345	Collapse T-348	+	spacer	2	1
Gorilla	CM055450.2	chr4_pat_hsa17x5	193461901	193465431	Collapse T-349	+	spacer	1	1
Gorilla	CM055450.2	chr4_pat_hsa17x5	193463655	193464570	Collapse T-350	+	spacer	2	1
Gorilla	CM055450.2	chr4_pat_hsa17x5	193457129	193459521	Collapse T-351	-	spacer	1	1
Gorilla	CM055450.2	chr4_pat_hsa17x5	193468168	193471287	Collapse T-352	+	spacer	1	2
Gorilla	CM055450.2	chr4_pat_hsa17x5	193470467	193471287	Collapse T-353	+	spacer	1	1
Gorilla	CM055450.2	chr4_pat_hsa17x5	193480510	193481594	Collapse T-354	+	spacer	1	1
Gorilla	CM055450.2	chr4_pat_hsa17x5	193471558	193472519	Collapse T-355	-	spacer	1	1
Gorilla	CM055450.2	chr4_pat_hsa17x5	194002257	194003838	Collapse T-356	-	spacer	1	1
Gorilla	CM055450.2	chr4_pat_hsa17x5	193993476	193994637	Collapse T-357	+	spacer	1	1
Gorilla	CM055450.2	chr4_pat_hsa17x5	193993873	193995044	Collapse T-358	+	spacer	2	1
Gorilla	CM055450.2	chr4_pat_hsa17x5	194007864	194009699	Collapse T-359	-	spacer	2	1
Gorilla	CM055450.2	chr4_pat_hsa17x5	194262011	194262864	Collapse T-360	-	spacer	1	1
Gorilla	CM055450.2	chr4_pat_hsa17x5	194276329	194277187	Collapse T-361	-	spacer	1	1
Gorilla	CM055450.2	chr4_pat_hsa17x5	194245170	194264588	Collapse T-362	+	spacer	1	2
Gorilla	CM055450.2	chr4_pat_hsa17x5	194252955	194256507	Collapse T-363	+	spacer	1	3
Gorilla	CM055450.2	chr4_pat_hsa17x5	194263791	194264582	Collapse T-364	+	spacer	1	1
Gorilla	CM055450.2	chr4_pat_hsa17x5	194264250	194265291	Collapse T-365	+	spacer	1	1
Gorilla	CM055450.2	chr4_pat_hsa17x5	194570841	194571873	Collapse T-366	-	spacer	1	1
Gorilla	CM055450.2	chr4_pat_hsa17x5	195124166	195125925	Collapse T-367	-	spacer	1	1
Gorilla	CM055450.2	chr4_pat_hsa17x5	195122785	195123113	Collapse T-368	+	spacer	1	1
Gorilla	CM055450.2	chr4_pat_hsa17x5	195143097	195144161	Collapse T-369	-	spacer	1	1
Gorilla	CM055451.2	chr5_mat_hsa6	508586	509448	Collapse T-370	+	spacer	1	1
Gorilla	CM055451.2	chr5_mat_hsa6	525839	526851	Collapse T-371	+	spacer	1	1
Gorilla	CM055451.2	chr5_mat_hsa6	526024	528562	Collapse T-372	+	spacer	3	1
Gorilla	CM055451.2	chr5_mat_hsa6	706350	709468	Collapse T-373	+	spacer	5	1
Gorilla	CM055451.2	chr5_mat_hsa6	519898	521302	Collapse T-374	-	spacer	1	1
Gorilla	CM055451.2	chr5_mat_hsa6	1307549	1310367	Collapse T-375	-	spacer	1	1
Gorilla	CM055451.2	chr5_mat_hsa6	1313026	1314763	Collapse T-376	+	spacer	2	1
Gorilla	CM055451.2	chr5_mat_hsa6	1495899	1496793	Collapse T-377	+	spacer	1	1
Gorilla	CM055451.2	chr5_mat_hsa6	1507316	1509730	Collapse T-378	+	spacer	3	1
Gorilla	CM055451.2	chr5_mat_hsa6	1313249	1314425	Collapse T-379	-	spacer	1	1
Gorilla	CM055451.2	chr5_mat_hsa6	1818955	1819922	Collapse T-380	+	spacer	1	1
Gorilla	CM055451.2	chr5_mat_hsa6	1827062	1828002	Collapse T-381	+	spacer	2	1
Gorilla	CM055451.2	chr5_mat_hsa6	1829944	1832864	Collapse T-382	+	spacer	3	1
Gorilla	CM055451.2	chr5_mat_hsa6	1835119	1836189	Collapse T-383	+	spacer	1	1
Gorilla	CM055451.2	chr5_mat_hsa6	1825430	1829792	Collapse T-384	-	spacer	1	1
Gorilla	CM055451.2	chr5_mat_hsa6	2156632	2157740	Collapse T-385	-	spacer	2	1
Gorilla	CM055451.2	chr5_mat_hsa6	2145870	2146935	Collapse T-386	+	spacer	1	1
Gorilla	CM055451.2	chr5_mat_hsa6	2164283	2165926	Collapse T-387	+	spacer	1	1
Gorilla	CM055451.2	chr5_mat_hsa6	2157815	2179534	Collapse T-388	-	spacer	2	2
Gorilla	CM055451.2	chr5_mat_hsa6	2163308	2164743	Collapse T-389	-	spacer	2	1
Gorilla	CM055451.2	chr5_mat_hsa6	2163575	2165296	Collapse T-390	-	spacer	3	1
Gorilla	CM055451.2	chr5_mat_hsa6	2626628	2627338	Collapse T-391	-	spacer	1	1
Gorilla	CM055451.2	chr5_mat_hsa6	2173358	2174113	Collapse T-392	+	spacer	1	1
Gorilla	CM055451.2	chr5_mat_hsa6	2634612	2636270	Collapse T-393	-	spacer	2	1
Gorilla	CM055451.2	chr5_mat_hsa6	2635055	2636077	Collapse T-394	-	spacer	1	1
Gorilla	CM055451.2	chr5_mat_hsa6	2640106	2641827	Collapse T-395	+	spacer	2	1
Gorilla	CM055451.2	chr5_mat_hsa6	2645258	2646848	Collapse T-396	-	spacer	1	1
Gorilla	CM055451.2	chr5_mat_hsa6	3497077	3497943	Collapse T-397	+	spacer	1	1
Gorilla	CM055451.2	chr5_mat_hsa6	3914288	3916215	Collapse T-398	-	spacer	2	1
Gorilla	CM055451.2	chr5_mat_hsa6	3924295	3925683	Collapse T-399	-	spacer	1	1
Gorilla	CM055451.2	chr5_mat_hsa6	3928743	3929579	Collapse T-400	-	spacer	1	1
Gorilla	CM055451.2	chr5_mat_hsa6	3917094	3919121	Collapse T-401	+	spacer	3	1
Gorilla	CM055451.2	chr5_mat_hsa6	3991061	3992262	Collapse T-402	-	spacer	1	1
Gorilla	CM055451.2	chr5_mat_hsa6	3999487	4000656	Collapse T-403	-	spacer	2	1
Gorilla	CM055451.2	chr5_mat_hsa6	4007333	4008263	Collapse T-404	-	spacer	1	1
Gorilla	CM055451.2	chr5_mat_hsa6	4550845	4552426	Collapse T-405	-	spacer	1	1
Gorilla	CM055451.2	chr5_mat_hsa6	3994807	3996550	Collapse T-406	+	spacer	1	1
Gorilla	CM055451.2	chr5_mat_hsa6	4577201	4578085	Collapse T-407	+	spacer	1	1
Gorilla	CM055451.2	chr5_mat_hsa6	4567992	4568657	Collapse T-408	-	spacer	1	1
Gorilla	CM055451.2	chr5_mat_hsa6	4980497	4995660	Collapse T-409	-	spacer	1	2
Gorilla	CM055451.2	chr5_mat_hsa6	4995450	4996657	Collapse T-410	-	spacer	1	1
Gorilla	CM055451.2	chr5_mat_hsa6	4980269	4981332	Collapse T-411	+	spacer	1	1
Gorilla	CM055451.2	chr5_mat_hsa6	5002627	5004916	Collapse T-412	+	spacer	10	1
Gorilla	CM055451.2	chr5_mat_hsa6	4997432	4997930	Collapse T-413	-	spacer	1	1
Gorilla	CM055451.2	chr5_mat_hsa6	4997699	4999107	Collapse T-414	-	spacer	1	1
Gorilla	CM055451.2	chr5_mat_hsa6	5006884	5008238	Collapse T-415	+	spacer	3	1
Gorilla	CM055451.2	chr5_mat_hsa6	5392949	5393980	Collapse T-416	-	spacer	1	1
Gorilla	CM055451.2	chr5_mat_hsa6	5398016	5400039	Collapse T-417	-	spacer	1	1
Gorilla	CM055451.2	chr5_mat_hsa6	5399412	5401110	Collapse T-418	-	spacer	1	1
Gorilla	CM055451.2	chr5_mat_hsa6	5397681	5399986	Collapse T-419	+	spacer	1	2
Gorilla	CM055451.2	chr5_mat_hsa6	6038019	6040385	Collapse T-420	-	spacer	1	1
Gorilla	CM055451.2	chr5_mat_hsa6	6038019	6043160	Collapse T-421	-	spacer	1	2
Gorilla	CM055451.2	chr5_mat_hsa6	6038019	6052639	Collapse T-422	-	spacer	2	2
Gorilla	CM055451.2	chr5_mat_hsa6	6038175	6040892	Collapse T-423	-	spacer	6	1
Gorilla	CM055451.2	chr5_mat_hsa6	6038175	6050635	Collapse T-424	-	spacer	1	2
Gorilla	CM055451.2	chr5_mat_hsa6	6038175	6052603	Collapse T-425	-	spacer	2	2
Gorilla	CM055451.2	chr5_mat_hsa6	6050104	6053735	Collapse T-426	-	spacer	2	1
Gorilla	CM055451.2	chr5_mat_hsa6	6052382	6053597	Collapse T-427	-	spacer	2	1
Gorilla	CM055451.2	chr5_mat_hsa6	6054633	6058989	Collapse T-428	-	spacer	3	2
Gorilla	CM055451.2	chr5_mat_hsa6	6054875	6055945	Collapse T-429	-	spacer	1	1
Gorilla	CM055451.2	chr5_mat_hsa6	6059440	6061535	Collapse T-430	-	spacer	1	1
Gorilla	CM055451.2	chr5_mat_hsa6	6065170	6066946	Collapse T-431	-	spacer	1	2
Gorilla	CM055451.2	chr5_mat_hsa6	6069046	6069876	Collapse T-432	-	spacer	1	1
Gorilla	CM055451.2	chr5_mat_hsa6	6188727	6189515	Collapse T-433	-	spacer	1	1
Gorilla	CM055451.2	chr5_mat_hsa6	6189228	6190283	Collapse T-434	-	spacer	1	1
Gorilla	CM055451.2	chr5_mat_hsa6	6200448	6201617	Collapse T-435	-	spacer	1	1
Gorilla	CM055451.2	chr5_mat_hsa6	6204962	6206140	Collapse T-436	-	spacer	1	1
Gorilla	CM055451.2	chr5_mat_hsa6	6453613	6456698	Collapse T-437	-	spacer	2	1
Gorilla	CM055451.2	chr5_mat_hsa6	6453912	6454891	Collapse T-438	-	spacer	1	1
Gorilla	CM055451.2	chr5_mat_hsa6	6467779	6468730	Collapse T-439	-	spacer	1	1
Gorilla	CM055451.2	chr5_mat_hsa6	6470030	6473614	Collapse T-440	-	spacer	7	1
Gorilla	CM055451.2	chr5_mat_hsa6	6470475	6472526	Collapse T-441	-	spacer	1	1
Gorilla	CM055451.2	chr5_mat_hsa6	6047458	6048379	Collapse T-442	+	spacer	1	1
Gorilla	CM055451.2	chr5_mat_hsa6	6211317	6212185	Collapse T-443	+	spacer	1	1
Gorilla	CM055451.2	chr5_mat_hsa6	6217387	6219757	Collapse T-444	+	spacer	1	2
Gorilla	CM055451.2	chr5_mat_hsa6	6470260	6472216	Collapse T-445	+	spacer	2	1
Gorilla	CM055451.2	chr5_mat_hsa6	6474588	6477246	Collapse T-446	+	spacer	7	1
Gorilla	CM055451.2	chr5_mat_hsa6	6766804	6769130	Collapse T-447	+	spacer	4	1
Gorilla	CM055451.2	chr5_mat_hsa6	6766837	6769130	Collapse T-448	+	spacer	1	1
Gorilla	CM055451.2	chr5_mat_hsa6	6767039	6768521	Collapse T-449	+	spacer	1	1
Gorilla	CM055451.2	chr5_mat_hsa6	6745522	6759922	Collapse T-450	-	spacer	2	2
Gorilla	CM055451.2	chr5_mat_hsa6	6762359	6763792	Collapse T-451	-	spacer	1	1
Gorilla	CM055451.2	chr5_mat_hsa6	6771640	6773342	Collapse T-452	-	spacer	1	2
Gorilla	CM055451.2	chr5_mat_hsa6	6915634	6917122	Collapse T-453	-	spacer	1	1
Gorilla	CM055451.2	chr5_mat_hsa6	6755340	6756846	Collapse T-454	-	spacer	1	1
Gorilla	CM055451.2	chr5_mat_hsa6	6756168	6758060	Collapse T-455	-	spacer	1	2
Gorilla	CM055451.2	chr5_mat_hsa6	6759665	6761157	Collapse T-456	-	spacer	1	1
Gorilla	CM055451.2	chr5_mat_hsa6	6760464	6761520	Collapse T-457	-	spacer	1	1
Gorilla	CM055451.2	chr5_mat_hsa6	6760983	6763518	Collapse T-458	-	spacer	4	1
Gorilla	CM055451.2	chr5_mat_hsa6	6761914	6764473	Collapse T-459	-	spacer	5	1
Gorilla	CM055451.2	chr5_mat_hsa6	6927355	6949140	Collapse T-460	-	spacer	1	2
Gorilla	CM055451.2	chr5_mat_hsa6	6931602	6933045	Collapse T-461	-	spacer	1	1
Gorilla	CM055451.2	chr5_mat_hsa6	7221596	7222831	Collapse T-462	+	spacer	1	1
Gorilla	CM055451.2	chr5_mat_hsa6	7220478	7222813	Collapse T-463	-	spacer	4	1
Gorilla	CM055451.2	chr5_mat_hsa6	7220921	7221960	Collapse T-464	-	spacer	1	1
Gorilla	CM055451.2	chr5_mat_hsa6	7225034	7227692	Collapse T-465	+	spacer	8	1
Gorilla	CM055451.2	chr5_mat_hsa6	7225814	7227083	Collapse T-466	+	spacer	1	1
Gorilla	CM055451.2	chr5_mat_hsa6	7499799	7500576	Collapse T-467	-	spacer	1	1
Gorilla	CM055451.2	chr5_mat_hsa6	7501029	7501920	Collapse T-468	-	spacer	2	1
Gorilla	CM055451.2	chr5_mat_hsa6	7499310	7501447	Collapse T-469	+	spacer	2	1
Gorilla	CM055451.2	chr5_mat_hsa6	7508713	7510064	Collapse T-470	+	spacer	1	1
Gorilla	CM055451.2	chr5_mat_hsa6	7512292	7514925	Collapse T-471	+	spacer	9	1
Gorilla	CM055451.2	chr5_mat_hsa6	7506259	7507670	Collapse T-472	-	spacer	1	1
Gorilla	CM055451.2	chr5_mat_hsa6	7512515	7514133	Collapse T-473	-	spacer	2	1
Gorilla	CM055451.2	chr5_mat_hsa6	7506627	7507595	Collapse T-474	-	spacer	1	1
Gorilla	CM055451.2	chr5_mat_hsa6	7506794	7508777	Collapse T-475	-	spacer	3	1
Gorilla	CM055451.2	chr5_mat_hsa6	7507442	7508784	Collapse T-476	-	spacer	1	1
Gorilla	CM055451.2	chr5_mat_hsa6	7507709	7509808	Collapse T-477	-	spacer	2	1
Gorilla	CM055451.2	chr5_mat_hsa6	7507711	7514366	Collapse T-478	-	spacer	1	2
Gorilla	CM055451.2	chr5_mat_hsa6	7508154	7509587	Collapse T-479	-	spacer	1	1
Gorilla	CM055451.2	chr5_mat_hsa6	7511405	7514011	Collapse T-480	-	spacer	1	1
Gorilla	CM055451.2	chr5_mat_hsa6	8174373	8175364	Collapse T-481	-	spacer	1	1
Gorilla	CM055451.2	chr5_mat_hsa6	8189728	8191005	Collapse T-482	-	spacer	4	1
Gorilla	CM055451.2	chr5_mat_hsa6	8189971	8190981	Collapse T-483	-	spacer	1	1
Gorilla	CM055451.2	chr5_mat_hsa6	8200634	8201337	Collapse T-484	-	spacer	1	1
Gorilla	CM055451.2	chr5_mat_hsa6	8200725	8201444	Collapse T-485	+	spacer	1	1
Gorilla	CM055451.2	chr5_mat_hsa6	8706106	8709080	Collapse T-486	-	spacer	1	2
Gorilla	CM055451.2	chr5_mat_hsa6	8717580	8717979	Collapse T-487	+	spacer	1	1
Gorilla	CM055451.2	chr5_mat_hsa6	8728109	8729949	Collapse T-488	+	spacer	2	2
Gorilla	CM055451.2	chr5_mat_hsa6	8728231	8729949	Collapse T-489	+	spacer	3	1
Gorilla	CM055451.2	chr5_mat_hsa6	8749056	8749785	Collapse T-490	+	spacer	1	1
Gorilla	CM055451.2	chr5_mat_hsa6	8722734	8756566	Collapse T-491	-	spacer	1	2
Gorilla	CM055451.2	chr5_mat_hsa6	8739769	8741545	Collapse T-492	-	spacer	5	1
Gorilla	CM055451.2	chr5_mat_hsa6	8739925	8772891	Collapse T-493	-	spacer	1	3
Gorilla	CM055451.2	chr5_mat_hsa6	8751509	8753169	Collapse T-494	-	spacer	2	1
Gorilla	CM055451.2	chr5_mat_hsa6	8756038	8757144	Collapse T-495	-	spacer	2	1
Gorilla	CM055451.2	chr5_mat_hsa6	9436501	9437971	Collapse T-496	+	spacer	1	1
Gorilla	CM055451.2	chr5_mat_hsa6	9442108	9443082	Collapse T-497	+	spacer	1	1
Gorilla	CM055451.2	chr5_mat_hsa6	9454679	9456532	Collapse T-498	+	spacer	4	1
Gorilla	CM055451.2	chr5_mat_hsa6	9689946	9691569	Collapse T-499	+	spacer	3	1
Gorilla	CM055451.2	chr5_mat_hsa6	9693781	9696441	Collapse T-500	+	spacer	4	1
Gorilla	CM055451.2	chr5_mat_hsa6	9432432	9433108	Collapse T-501	-	spacer	1	1
Gorilla	CM055451.2	chr5_mat_hsa6	9432634	9434334	Collapse T-502	-	spacer	2	1
Gorilla	CM055451.2	chr5_mat_hsa6	9682643	9683348	Collapse T-503	-	spacer	1	1
Gorilla	CM055451.2	chr5_mat_hsa6	9687458	9688322	Collapse T-504	-	spacer	1	1
Gorilla	CM055451.2	chr5_mat_hsa6	9687767	9688758	Collapse T-505	-	spacer	1	1
Gorilla	CM055451.2	chr5_mat_hsa6	9688131	9689121	Collapse T-506	-	spacer	1	1
Gorilla	CM055451.2	chr5_mat_hsa6	9689664	9691529	Collapse T-507	-	spacer	1	1
Gorilla	CM055451.2	chr5_mat_hsa6	10837014	10839771	Collapse T-508	-	spacer	1	1
Gorilla	CM055451.2	chr5_mat_hsa6	10841946	10843900	Collapse T-509	+	spacer	3	1
Gorilla	CM055451.2	chr5_mat_hsa6	10841991	10845033	Collapse T-510	-	spacer	4	1
Gorilla	CM055451.2	chr5_mat_hsa6	10846512	10848761	Collapse T-511	+	spacer	3	1
Gorilla	CM055451.2	chr5_mat_hsa6	11067773	11068855	Collapse T-512	-	spacer	1	1
Gorilla	CM055451.2	chr5_mat_hsa6	11069095	11073266	Collapse T-513	+	spacer	2	1
Gorilla	CM055451.2	chr5_mat_hsa6	11085105	11086521	Collapse T-514	+	spacer	3	1
Gorilla	CM055451.2	chr5_mat_hsa6	11083940	11103203	Collapse T-515	-	spacer	1	2
Gorilla	CM055451.2	chr5_mat_hsa6	11482478	11483201	Collapse T-516	+	spacer	1	1
Gorilla	CM055451.2	chr5_mat_hsa6	11494091	11496138	Collapse T-517	+	spacer	7	1
Gorilla	CM055451.2	chr5_mat_hsa6	11488658	11489708	Collapse T-518	-	spacer	1	1
Gorilla	CM055451.2	chr5_mat_hsa6	11488925	11489708	Collapse T-519	-	spacer	1	1
Gorilla	CM055451.2	chr5_mat_hsa6	11649732	11650813	Collapse T-520	+	spacer	1	1
Gorilla	CM055451.2	chr5_mat_hsa6	11649822	11651222	Collapse T-521	-	spacer	1	1
Gorilla	CM055451.2	chr5_mat_hsa6	11649978	11650687	Collapse T-522	-	spacer	1	1
Gorilla	CM055451.2	chr5_mat_hsa6	11659729	11660553	Collapse T-523	-	spacer	2	1
Gorilla	CM055451.2	chr5_mat_hsa6	11660312	11662515	Collapse T-524	-	spacer	1	1
Gorilla	CM055451.2	chr5_mat_hsa6	11665806	11666721	Collapse T-525	-	spacer	2	1
Gorilla	CM055451.2	chr5_mat_hsa6	11654379	11655314	Collapse T-526	+	spacer	1	1
Gorilla	CM055451.2	chr5_mat_hsa6	11667623	11669607	Collapse T-527	+	spacer	2	1
Gorilla	CM055451.2	chr5_mat_hsa6	11670687	11674471	Collapse T-528	+	spacer	8	1
Gorilla	CM055451.2	chr5_mat_hsa6	11667035	11669448	Collapse T-529	-	spacer	2	1
Gorilla	CM055451.2	chr5_mat_hsa6	11667256	11672120	Collapse T-530	-	spacer	4	1
Gorilla	CM055451.2	chr5_mat_hsa6	11667498	11669423	Collapse T-531	-	spacer	1	1
Gorilla	CM055451.2	chr5_mat_hsa6	11742064	11745839	Collapse T-532	+	spacer	4	1
Gorilla	CM055451.2	chr5_mat_hsa6	11755543	11756897	Collapse T-533	-	spacer	1	1
Gorilla	CM055451.2	chr5_mat_hsa6	11756706	11757994	Collapse T-534	-	spacer	4	1
Gorilla	CM055451.2	chr5_mat_hsa6	11757572	11758369	Collapse T-535	-	spacer	1	1
Gorilla	CM055451.2	chr5_mat_hsa6	11757795	11758901	Collapse T-536	-	spacer	1	1
Gorilla	CM055451.2	chr5_mat_hsa6	11765649	11766544	Collapse T-537	-	spacer	1	1
Gorilla	CM055451.2	chr5_mat_hsa6	11762679	11765009	Collapse T-538	+	spacer	3	1
Gorilla	CM055451.2	chr5_mat_hsa6	11779664	11782416	Collapse T-539	+	spacer	6	1
Gorilla	CM055451.2	chr5_mat_hsa6	11777581	11778812	Collapse T-540	-	spacer	1	1
Gorilla	CM055451.2	chr5_mat_hsa6	11785758	11787163	Collapse T-541	+	spacer	1	1
Gorilla	CM055451.2	chr5_mat_hsa6	11794922	11796730	Collapse T-542	+	spacer	2	1
Gorilla	CM055451.2	chr5_mat_hsa6	11800138	11801596	Collapse T-543	+	spacer	1	1
Gorilla	CM055451.2	chr5_mat_hsa6	11803831	11804924	Collapse T-544	+	spacer	1	1
Gorilla	CM055451.2	chr5_mat_hsa6	12053174	12055038	Collapse T-545	+	spacer	2	1
Gorilla	CM055451.2	chr5_mat_hsa6	11794112	11796316	Collapse T-546	-	spacer	2	1
Gorilla	CM055451.2	chr5_mat_hsa6	11794381	11795254	Collapse T-547	-	spacer	1	1
Gorilla	CM055451.2	chr5_mat_hsa6	12364254	12365468	Collapse T-548	-	spacer	1	1
Gorilla	CM055451.2	chr5_mat_hsa6	12352127	12354591	Collapse T-549	+	spacer	3	1
Gorilla	CM055451.2	chr5_mat_hsa6	12366236	12368197	Collapse T-550	-	spacer	2	1
Gorilla	CM055451.2	chr5_mat_hsa6	12366503	12368227	Collapse T-551	-	spacer	1	1
Gorilla	CM055451.2	chr5_mat_hsa6	12588547	12591241	Collapse T-552	-	spacer	1	1
Gorilla	CM055451.2	chr5_mat_hsa6	12597726	12598673	Collapse T-553	-	spacer	1	1
Gorilla	CM055451.2	chr5_mat_hsa6	12372488	12373718	Collapse T-554	+	spacer	1	1
Gorilla	CM055451.2	chr5_mat_hsa6	12603057	12603771	Collapse T-555	+	spacer	1	1
Gorilla	CM055451.2	chr5_mat_hsa6	12604796	12606471	Collapse T-556	+	spacer	2	1
Gorilla	CM055451.2	chr5_mat_hsa6	12609851	12611503	Collapse T-557	+	spacer	1	1
Gorilla	CM055451.2	chr5_mat_hsa6	12613892	12614830	Collapse T-558	+	spacer	1	1
Gorilla	CM055451.2	chr5_mat_hsa6	12602034	12603432	Collapse T-559	-	spacer	1	1
Gorilla	CM055451.2	chr5_mat_hsa6	12602833	12604059	Collapse T-560	-	spacer	1	1
Gorilla	CM055451.2	chr5_mat_hsa6	12603197	12605182	Collapse T-561	-	spacer	1	1
Gorilla	CM055451.2	chr5_mat_hsa6	12603319	12606930	Collapse T-562	-	spacer	4	1
Gorilla	CM055451.2	chr5_mat_hsa6	12604064	12606024	Collapse T-563	-	spacer	5	1
Gorilla	CM055451.2	chr5_mat_hsa6	12604285	12606916	Collapse T-564	-	spacer	18	1
Gorilla	CM055451.2	chr5_mat_hsa6	12604285	12608416	Collapse T-565	-	spacer	1	2
Gorilla	CM055451.2	chr5_mat_hsa6	12604527	12605327	Collapse T-566	-	spacer	1	1
Gorilla	CM055451.2	chr5_mat_hsa6	12604728	12606239	Collapse T-567	-	spacer	1	1
Gorilla	CM055451.2	chr5_mat_hsa6	13172630	13175552	Collapse T-568	-	spacer	3	2
Gorilla	CM055451.2	chr5_mat_hsa6	12707969	12708822	Collapse T-569	+	spacer	5	1
Gorilla	CM055451.2	chr5_mat_hsa6	13189939	13191753	Collapse T-570	+	spacer	3	1
Gorilla	CM055451.2	chr5_mat_hsa6	13189844	13191358	Collapse T-571	-	spacer	1	1
Gorilla	CM055451.2	chr5_mat_hsa6	13202924	13204034	Collapse T-572	+	spacer	1	1
Gorilla	CM055451.2	chr5_mat_hsa6	13206434	13209529	Collapse T-573	-	spacer	8	1
Gorilla	CM055451.2	chr5_mat_hsa6	13206590	13208881	Collapse T-574	-	spacer	3	1
Gorilla	CM055451.2	chr5_mat_hsa6	13207091	13208251	Collapse T-575	-	spacer	1	1
Gorilla	CM055451.2	chr5_mat_hsa6	13221521	13222282	Collapse T-576	-	spacer	1	1
Gorilla	CM055451.2	chr5_mat_hsa6	13211447	13212206	Collapse T-577	+	spacer	1	1
Gorilla	CM055451.2	chr5_mat_hsa6	13224146	13225325	Collapse T-578	+	spacer	1	1
Gorilla	CM055451.2	chr5_mat_hsa6	13227962	13230189	Collapse T-579	+	spacer	2	1
Gorilla	CM055451.2	chr5_mat_hsa6	13223416	13224283	Collapse T-580	-	spacer	1	1
Gorilla	CM055451.2	chr5_mat_hsa6	13223574	13228833	Collapse T-581	-	spacer	2	3
Gorilla	CM055451.2	chr5_mat_hsa6	13624029	13625298	Collapse T-582	-	spacer	2	1
Gorilla	CM055451.2	chr5_mat_hsa6	13624185	13626253	Collapse T-583	-	spacer	6	1
Gorilla	CM055451.2	chr5_mat_hsa6	13631827	13632627	Collapse T-584	-	spacer	2	1
Gorilla	CM055451.2	chr5_mat_hsa6	13632018	13634437	Collapse T-585	-	spacer	2	1
Gorilla	CM055451.2	chr5_mat_hsa6	13632359	13634060	Collapse T-586	+	spacer	1	1
Gorilla	CM055451.2	chr5_mat_hsa6	13639655	13645416	Collapse T-587	-	spacer	1	1
Gorilla	CM055451.2	chr5_mat_hsa6	13640038	13643926	Collapse T-588	-	spacer	2	1
Gorilla	CM055451.2	chr5_mat_hsa6	13640305	13644520	Collapse T-589	-	spacer	19	1
Gorilla	CM055451.2	chr5_mat_hsa6	13640547	13642725	Collapse T-590	-	spacer	1	1
Gorilla	CM055451.2	chr5_mat_hsa6	13644790	13647522	Collapse T-591	+	spacer	4	1
Gorilla	CM055451.2	chr5_mat_hsa6	16152285	16153209	Collapse T-592	+	spacer	1	1
Gorilla	CM055451.2	chr5_mat_hsa6	16156508	16157291	Collapse T-593	-	spacer	1	2
Gorilla	CM055451.2	chr5_mat_hsa6	16169783	16170549	Collapse T-594	-	spacer	1	1
Gorilla	CM055451.2	chr5_mat_hsa6	16164962	16166174	Collapse T-595	+	spacer	4	1
Gorilla	CM055451.2	chr5_mat_hsa6	17247739	17249330	Collapse T-596	+	spacer	3	1
Gorilla	CM055451.2	chr5_mat_hsa6	17241844	17242985	Collapse T-597	-	spacer	1	1
Gorilla	CM055451.2	chr5_mat_hsa6	17242111	17247526	Collapse T-598	-	spacer	3	1
Gorilla	CM055451.2	chr5_mat_hsa6	17477289	17481581	Collapse T-599	-	spacer	5	2
Gorilla	CM055451.2	chr5_mat_hsa6	17482459	17484496	Collapse T-600	+	spacer	4	1
Gorilla	CM055451.2	chr5_mat_hsa6	17483082	17483887	Collapse T-601	+	spacer	1	1
Gorilla	CM055446.2	chr1_pat_hsa1	1136121	1138960	Collapse T-602	-	spacer	1	1
Gorilla	CM055446.2	chr1_pat_hsa1	1136264	1138826	Collapse T-603	-	spacer	1	1
Gorilla	CM055451.2	chr5_mat_hsa6	196326222	196327320	Collapse T-604	+	spacer	2	1
Gorilla	CM055451.2	chr5_mat_hsa6	196326314	196327475	Collapse T-605	+	spacer	4	1
Gorilla	CM055451.2	chr5_mat_hsa6	196326574	196327471	Collapse T-606	+	spacer	1	2
Gorilla	CM055451.2	chr5_mat_hsa6	196326852	196328844	Collapse T-607	+	spacer	1	1
Gorilla	CM055451.2	chr5_mat_hsa6	196326868	196327945	Collapse T-608	+	spacer	1	1
Gorilla	CM055451.2	chr5_mat_hsa6	196329453	196331902	Collapse T-609	+	spacer	1	1
Gorilla	CM055451.2	chr5_mat_hsa6	196324039	196325843	Collapse T-610	-	spacer	2	1
Gorilla	CM055451.2	chr5_mat_hsa6	196821599	196822650	Collapse T-611	+	spacer	1	1
Gorilla	CM055451.2	chr5_mat_hsa6	196821622	196822540	Collapse T-612	+	spacer	1	1
Gorilla	CM055451.2	chr5_mat_hsa6	196821926	196822904	Collapse T-613	+	spacer	1	1
Gorilla	CM055451.2	chr5_mat_hsa6	196822611	196824051	Collapse T-614	+	spacer	1	1
Gorilla	CM055451.2	chr5_mat_hsa6	196837349	196837984	Collapse T-615	+	spacer	1	1
Gorilla	CM055451.2	chr5_mat_hsa6	197400441	197403867	Collapse T-616	+	spacer	3	1
Gorilla	CM055451.2	chr5_mat_hsa6	197402621	197404666	Collapse T-617	+	spacer	4	1
Gorilla	CM055451.2	chr5_mat_hsa6	197402624	197403503	Collapse T-618	+	spacer	3	1
Gorilla	CM055451.2	chr5_mat_hsa6	197406231	197407933	Collapse T-619	+	spacer	1	1
Gorilla	CM055451.2	chr5_mat_hsa6	197406950	197409389	Collapse T-620	+	spacer	1	2
Gorilla	CM055451.2	chr5_mat_hsa6	197849332	197854220	Collapse T-621	+	spacer	3	1
Gorilla	CM055451.2	chr5_mat_hsa6	197851467	197854727	Collapse T-622	+	spacer	21	1
Gorilla	CM055451.2	chr5_mat_hsa6	197852002	197854932	Collapse T-623	+	spacer	6	1
Gorilla	CM055451.2	chr5_mat_hsa6	197854553	197857359	Collapse T-624	+	spacer	2	1
Gorilla	CM055451.2	chr5_mat_hsa6	197854872	197855752	Collapse T-625	+	spacer	1	1
Gorilla	CM055451.2	chr5_mat_hsa6	196819103	196820828	Collapse T-626	-	spacer	1	1
Gorilla	CM055451.2	chr5_mat_hsa6	197860354	197861631	Collapse T-627	+	spacer	2	1
Gorilla	CM055451.2	chr5_mat_hsa6	197860781	197862217	Collapse T-628	+	spacer	2	1
Gorilla	CM055451.2	chr5_mat_hsa6	197860411	197861388	Collapse T-629	-	spacer	1	1
Gorilla	CM055451.2	chr5_mat_hsa6	197862322	197863994	Collapse T-630	+	spacer	2	1
Gorilla	CM055451.2	chr5_mat_hsa6	197868746	197869500	Collapse T-631	+	spacer	1	1
Gorilla	CM055451.2	chr5_mat_hsa6	197866384	197869517	Collapse T-632	-	spacer	3	1
Gorilla	CM055451.2	chr5_mat_hsa6	197870709	197871718	Collapse T-633	+	spacer	1	1
Gorilla	CM055451.2	chr5_mat_hsa6	198672831	198674521	Collapse T-634	+	spacer	1	1
Gorilla	CM055451.2	chr5_mat_hsa6	198677302	198679567	Collapse T-635	+	spacer	3	1
Gorilla	CM055451.2	chr5_mat_hsa6	198678435	198679300	Collapse T-636	+	spacer	1	1
Gorilla	CM055451.2	chr5_mat_hsa6	198680425	198681763	Collapse T-637	+	spacer	2	1
Gorilla	CM055451.2	chr5_mat_hsa6	198680528	198681549	Collapse T-638	+	spacer	2	1
Gorilla	CM055451.2	chr5_mat_hsa6	198682772	198684824	Collapse T-639	+	spacer	6	1
Gorilla	CM055451.2	chr5_mat_hsa6	198692267	198696353	Collapse T-640	+	spacer	2	1
Gorilla	CM055451.2	chr5_mat_hsa6	198694265	198696509	Collapse T-641	+	spacer	1	1
Gorilla	CM055451.2	chr5_mat_hsa6	198994458	198995335	Collapse T-642	+	spacer	3	1
Gorilla	CM055451.2	chr5_mat_hsa6	198996563	198997584	Collapse T-643	+	spacer	1	1
Gorilla	CM055451.2	chr5_mat_hsa6	198996667	198997816	Collapse T-644	+	spacer	1	2
Gorilla	CM055451.2	chr5_mat_hsa6	198996818	198997790	Collapse T-645	+	spacer	1	2
Gorilla	CM055451.2	chr5_mat_hsa6	198999136	199000851	Collapse T-646	+	spacer	5	1
Gorilla	CM055451.2	chr5_mat_hsa6	199000786	199002888	Collapse T-647	+	spacer	1	2
Gorilla	CM055451.2	chr5_mat_hsa6	199003325	199004810	Collapse T-648	+	spacer	1	1
Gorilla	CM055451.2	chr5_mat_hsa6	199006680	199012379	Collapse T-649	+	spacer	5	1
Gorilla	CM055451.2	chr5_mat_hsa6	199008637	199012535	Collapse T-650	+	spacer	1	1
Gorilla	CM055451.2	chr5_mat_hsa6	199219999	199220747	Collapse T-651	+	spacer	1	1
Gorilla	CM055451.2	chr5_mat_hsa6	199226652	199228564	Collapse T-652	+	spacer	5	1
Gorilla	CM055451.2	chr5_mat_hsa6	199226742	199228785	Collapse T-653	+	spacer	1	1
Gorilla	CM055451.2	chr5_mat_hsa6	199228183	199229649	Collapse T-654	+	spacer	3	1
Gorilla	CM055451.2	chr5_mat_hsa6	199230912	199231598	Collapse T-655	+	spacer	1	1
Gorilla	CM055451.2	chr5_mat_hsa6	199007043	199009039	Collapse T-656	-	spacer	2	1
Gorilla	CM055451.2	chr5_mat_hsa6	199232975	199237896	Collapse T-657	+	spacer	1	1
Gorilla	CM055451.2	chr5_mat_hsa6	199246544	199248456	Collapse T-658	+	spacer	1	1
Gorilla	CM055451.2	chr5_mat_hsa6	199250437	199251033	Collapse T-659	+	spacer	1	1
Gorilla	CM055451.2	chr5_mat_hsa6	199264322	199265465	Collapse T-660	+	spacer	4	1
Gorilla	CM055451.2	chr5_mat_hsa6	199264465	199265621	Collapse T-661	+	spacer	6	1
Gorilla	CM055451.2	chr5_mat_hsa6	199282023	199282960	Collapse T-662	+	spacer	1	1
Gorilla	CM055451.2	chr5_mat_hsa6	199282741	199284941	Collapse T-663	+	spacer	1	1
Gorilla	CM055451.2	chr5_mat_hsa6	199282793	199283778	Collapse T-664	+	spacer	1	1
Gorilla	CM055451.2	chr5_mat_hsa6	199282861	199284142	Collapse T-665	+	spacer	2	1
Gorilla	CM055451.2	chr5_mat_hsa6	199282950	199284248	Collapse T-666	+	spacer	1	1
Gorilla	CM055451.2	chr5_mat_hsa6	199283723	199285273	Collapse T-667	+	spacer	2	1
Gorilla	CM055451.2	chr5_mat_hsa6	199301657	199302814	Collapse T-668	+	spacer	1	1
Gorilla	CM055451.2	chr5_mat_hsa6	199241237	199277488	Collapse T-669	-	spacer	1	2
Gorilla	CM055451.2	chr5_mat_hsa6	199241237	199243831	Collapse T-670	-	spacer	1	1
Gorilla	CM055451.2	chr5_mat_hsa6	199241237	199276255	Collapse T-671	-	spacer	1	2
Gorilla	CM055451.2	chr5_mat_hsa6	199246105	199248044	Collapse T-672	-	spacer	1	1
Gorilla	CM055451.2	chr5_mat_hsa6	199260129	199261932	Collapse T-673	-	spacer	1	1
Gorilla	CM055451.2	chr5_mat_hsa6	199309362	199310600	Collapse T-674	+	spacer	1	1
Gorilla	CM055451.2	chr5_mat_hsa6	199315192	199316538	Collapse T-675	-	spacer	1	1
Gorilla	CM055451.2	chr5_mat_hsa6	199320344	199322409	Collapse T-676	+	spacer	1	1
Gorilla	CM055451.2	chr5_mat_hsa6	199321781	199322671	Collapse T-677	+	spacer	1	1
Gorilla	CM055451.2	chr5_mat_hsa6	199322504	199323490	Collapse T-678	+	spacer	1	1
Gorilla	CM055451.2	chr5_mat_hsa6	199323035	199324878	Collapse T-679	+	spacer	1	1
Gorilla	CM055451.2	chr5_mat_hsa6	199335465	199337475	Collapse T-680	+	spacer	1	1
Gorilla	CM055451.2	chr5_mat_hsa6	199336987	199338247	Collapse T-681	+	spacer	1	1
Gorilla	CM055451.2	chr5_mat_hsa6	199341562	199342287	Collapse T-682	+	spacer	4	1
Gorilla	CM055451.2	chr5_mat_hsa6	199342911	199344754	Collapse T-683	+	spacer	1	1
Gorilla	CM055451.2	chr5_mat_hsa6	199335068	199337707	Collapse T-684	-	spacer	5	1
Gorilla	CM055451.2	chr5_mat_hsa6	199354933	199356279	Collapse T-685	-	spacer	3	1
Gorilla	CM055452.2	chr6_mat_hsa7	253647	256756	Collapse T-686	-	spacer	1	2
Gorilla	CM055451.2	chr5_mat_hsa6	199354182	199354848	Collapse T-687	+	spacer	1	1
Gorilla	CM055452.2	chr6_mat_hsa7	262210	263633	Collapse T-688	+	spacer	2	1
Gorilla	CM055452.2	chr6_mat_hsa7	275405	278058	Collapse T-689	+	spacer	6	1
Gorilla	CM055446.2	chr1_pat_hsa1	2794591	2796743	Collapse T-690	+	spacer	3	1
Gorilla	CM055452.2	chr6_mat_hsa7	279830	281381	Collapse T-691	+	spacer	4	1
Gorilla	CM055452.2	chr6_mat_hsa7	261979	262787	Collapse T-692	-	spacer	1	1
Gorilla	CM055452.2	chr6_mat_hsa7	673069	673998	Collapse T-693	+	spacer	3	1
Gorilla	CM055452.2	chr6_mat_hsa7	674522	675491	Collapse T-694	+	spacer	1	1
Gorilla	CM055452.2	chr6_mat_hsa7	673686	675961	Collapse T-695	-	spacer	1	1
Gorilla	CM055452.2	chr6_mat_hsa7	674269	676291	Collapse T-696	-	spacer	1	2
Gorilla	CM055452.2	chr6_mat_hsa7	674513	675979	Collapse T-697	-	spacer	1	1
Gorilla	CM055452.2	chr6_mat_hsa7	690993	691753	Collapse T-698	+	spacer	1	1
Gorilla	CM055452.2	chr6_mat_hsa7	813342	814235	Collapse T-699	-	spacer	1	1
Gorilla	CM055452.2	chr6_mat_hsa7	813541	816367	Collapse T-700	-	spacer	2	1
Gorilla	CM055452.2	chr6_mat_hsa7	823907	824672	Collapse T-701	-	spacer	1	1
Gorilla	CM055452.2	chr6_mat_hsa7	827296	827918	Collapse T-702	-	spacer	1	2
Gorilla	CM055452.2	chr6_mat_hsa7	827405	828615	Collapse T-703	-	spacer	1	2
Gorilla	CM055452.2	chr6_mat_hsa7	815436	818873	Collapse T-704	+	spacer	1	1
Gorilla	CM055452.2	chr6_mat_hsa7	830872	832085	Collapse T-705	+	spacer	2	1
Gorilla	CM055452.2	chr6_mat_hsa7	830900	832255	Collapse T-706	+	spacer	1	1
Gorilla	CM055452.2	chr6_mat_hsa7	829679	830683	Collapse T-707	-	spacer	1	1
Gorilla	CM055452.2	chr6_mat_hsa7	829900	833009	Collapse T-708	-	spacer	15	1
Gorilla	CM055452.2	chr6_mat_hsa7	830343	831854	Collapse T-709	-	spacer	2	1
Gorilla	CM055452.2	chr6_mat_hsa7	835286	837118	Collapse T-710	+	spacer	4	1
Gorilla	CM055452.2	chr6_mat_hsa7	911118	911988	Collapse T-711	+	spacer	1	1
Gorilla	CM055452.2	chr6_mat_hsa7	910967	913254	Collapse T-712	-	spacer	2	1
Gorilla	CM055452.2	chr6_mat_hsa7	911162	916447	Collapse T-713	-	spacer	10	1
Gorilla	CM055452.2	chr6_mat_hsa7	911553	912871	Collapse T-714	-	spacer	2	1
Gorilla	CM055452.2	chr6_mat_hsa7	911663	914573	Collapse T-715	-	spacer	2	1
Gorilla	CM055452.2	chr6_mat_hsa7	914387	916786	Collapse T-716	+	spacer	2	1
Gorilla	CM055452.2	chr6_mat_hsa7	914846	916497	Collapse T-717	+	spacer	6	1
Gorilla	CM055452.2	chr6_mat_hsa7	922986	943778	Collapse T-718	-	spacer	1	2
Gorilla	CM055452.2	chr6_mat_hsa7	926592	927582	Collapse T-719	-	spacer	1	1
Gorilla	CM055452.2	chr6_mat_hsa7	927462	929021	Collapse T-720	-	spacer	6	1
Gorilla	CM055452.2	chr6_mat_hsa7	928019	929874	Collapse T-721	+	spacer	2	1
Gorilla	CM055452.2	chr6_mat_hsa7	1009328	1010806	Collapse T-722	-	spacer	2	1
Gorilla	CM055452.2	chr6_mat_hsa7	1019641	1022792	Collapse T-723	-	spacer	1	1
Gorilla	CM055452.2	chr6_mat_hsa7	1019939	1020863	Collapse T-724	+	spacer	1	1
Gorilla	CM055452.2	chr6_mat_hsa7	1032939	1033794	Collapse T-725	+	spacer	1	1
Gorilla	CM055452.2	chr6_mat_hsa7	1024123	1024965	Collapse T-726	-	spacer	1	1
Gorilla	CM055452.2	chr6_mat_hsa7	1329644	1330936	Collapse T-727	-	spacer	1	1
Gorilla	CM055452.2	chr6_mat_hsa7	1035719	1037115	Collapse T-728	+	spacer	1	1
Gorilla	CM055452.2	chr6_mat_hsa7	1330993	1332086	Collapse T-729	-	spacer	1	1
Gorilla	CM055452.2	chr6_mat_hsa7	1331149	1332139	Collapse T-730	-	spacer	1	1
Gorilla	CM055452.2	chr6_mat_hsa7	1331813	1332315	Collapse T-731	-	spacer	1	1
Gorilla	CM055452.2	chr6_mat_hsa7	1332080	1334078	Collapse T-732	-	spacer	2	1
Gorilla	CM055452.2	chr6_mat_hsa7	1343825	1345332	Collapse T-733	-	spacer	1	1
Gorilla	CM055452.2	chr6_mat_hsa7	1541674	1542807	Collapse T-734	-	spacer	2	1
Gorilla	CM055452.2	chr6_mat_hsa7	1338572	1339293	Collapse T-735	+	spacer	1	1
Gorilla	CM055452.2	chr6_mat_hsa7	1549912	1551363	Collapse T-736	-	spacer	1	1
Gorilla	CM055452.2	chr6_mat_hsa7	1550208	1551630	Collapse T-737	+	spacer	1	1
Gorilla	CM055452.2	chr6_mat_hsa7	1557759	1560936	Collapse T-738	-	spacer	1	1
Gorilla	CM055452.2	chr6_mat_hsa7	1557930	1559376	Collapse T-739	-	spacer	2	1
Gorilla	CM055452.2	chr6_mat_hsa7	1558846	1560023	Collapse T-740	-	spacer	1	1
Gorilla	CM055452.2	chr6_mat_hsa7	1564232	1566058	Collapse T-741	+	spacer	2	1
Gorilla	CM055452.2	chr6_mat_hsa7	1565283	1567589	Collapse T-742	-	spacer	1	1
Gorilla	CM055452.2	chr6_mat_hsa7	1846101	1848307	Collapse T-743	+	spacer	1	2
Gorilla	CM055452.2	chr6_mat_hsa7	1846393	1848307	Collapse T-744	+	spacer	8	1
Gorilla	CM055452.2	chr6_mat_hsa7	1860728	1862491	Collapse T-745	+	spacer	1	1
Gorilla	CM055452.2	chr6_mat_hsa7	1864982	1867353	Collapse T-746	+	spacer	3	1
Gorilla	CM055452.2	chr6_mat_hsa7	1869323	1870678	Collapse T-747	+	spacer	2	1
Gorilla	CM055452.2	chr6_mat_hsa7	1941158	1942221	Collapse T-748	+	spacer	1	1
Gorilla	CM055452.2	chr6_mat_hsa7	1859053	1860341	Collapse T-749	-	spacer	1	1
Gorilla	CM055452.2	chr6_mat_hsa7	1860079	1861248	Collapse T-750	-	spacer	1	1
Gorilla	CM055452.2	chr6_mat_hsa7	1860585	1861384	Collapse T-751	-	spacer	1	1
Gorilla	CM055452.2	chr6_mat_hsa7	1943046	1946725	Collapse T-752	+	spacer	4	1
Gorilla	CM055452.2	chr6_mat_hsa7	1964236	1965761	Collapse T-753	+	spacer	2	1
Gorilla	CM055452.2	chr6_mat_hsa7	1956298	1957526	Collapse T-754	-	spacer	2	1
Gorilla	CM055452.2	chr6_mat_hsa7	1957097	1958847	Collapse T-755	-	spacer	1	1
Gorilla	CM055452.2	chr6_mat_hsa7	1957616	1958897	Collapse T-756	-	spacer	2	1
Gorilla	CM055452.2	chr6_mat_hsa7	1958548	1962019	Collapse T-757	-	spacer	2	1
Gorilla	CM055452.2	chr6_mat_hsa7	2081650	2082713	Collapse T-758	+	spacer	1	1
Gorilla	CM055452.2	chr6_mat_hsa7	2081722	2083450	Collapse T-759	-	spacer	1	1
Gorilla	CM055452.2	chr6_mat_hsa7	2081878	2084152	Collapse T-760	-	spacer	1	1
Gorilla	CM055452.2	chr6_mat_hsa7	2093547	2095117	Collapse T-761	-	spacer	1	1
Gorilla	CM055452.2	chr6_mat_hsa7	2098124	2098872	Collapse T-762	-	spacer	1	1
Gorilla	CM055452.2	chr6_mat_hsa7	2085011	2087217	Collapse T-763	+	spacer	3	1
Gorilla	CM055452.2	chr6_mat_hsa7	2103607	2106252	Collapse T-764	+	spacer	5	1
Gorilla	CM055452.2	chr6_mat_hsa7	2108512	2109574	Collapse T-765	+	spacer	1	1
Gorilla	CM055452.2	chr6_mat_hsa7	2099040	2100663	Collapse T-766	-	spacer	3	1
Gorilla	CM055452.2	chr6_mat_hsa7	2271293	2272263	Collapse T-767	-	spacer	1	1
Gorilla	CM055452.2	chr6_mat_hsa7	2259791	2261720	Collapse T-768	+	spacer	3	1
Gorilla	CM055452.2	chr6_mat_hsa7	2274171	2275894	Collapse T-769	+	spacer	1	1
Gorilla	CM055452.2	chr6_mat_hsa7	2278101	2280755	Collapse T-770	+	spacer	6	1
Gorilla	CM055452.2	chr6_mat_hsa7	2273276	2274179	Collapse T-771	-	spacer	1	1
Gorilla	CM055452.2	chr6_mat_hsa7	2273543	2275684	Collapse T-772	-	spacer	1	1
Gorilla	CM055452.2	chr6_mat_hsa7	2282296	2284076	Collapse T-773	+	spacer	1	1
Gorilla	CM055452.2	chr6_mat_hsa7	2283267	2284058	Collapse T-774	-	spacer	1	1
Gorilla	CM055452.2	chr6_mat_hsa7	3059521	3061271	Collapse T-775	-	spacer	1	1
Gorilla	CM055452.2	chr6_mat_hsa7	3059259	3060461	Collapse T-776	+	spacer	1	1
Gorilla	CM055452.2	chr6_mat_hsa7	3435488	3436719	Collapse T-777	+	spacer	2	1
Gorilla	CM055452.2	chr6_mat_hsa7	3065776	3066679	Collapse T-778	-	spacer	2	1
Gorilla	CM055452.2	chr6_mat_hsa7	3439944	3441370	Collapse T-779	+	spacer	1	1
Gorilla	CM055452.2	chr6_mat_hsa7	3447498	3448682	Collapse T-780	-	spacer	1	1
Gorilla	CM055452.2	chr6_mat_hsa7	3448591	3450971	Collapse T-781	-	spacer	2	1
Gorilla	CM055452.2	chr6_mat_hsa7	3449119	3450769	Collapse T-782	+	spacer	1	1
Gorilla	CM055452.2	chr6_mat_hsa7	3458020	3459122	Collapse T-783	+	spacer	3	1
Gorilla	CM055452.2	chr6_mat_hsa7	3455882	3456757	Collapse T-784	-	spacer	1	1
Gorilla	CM055452.2	chr6_mat_hsa7	3817270	3819130	Collapse T-785	-	spacer	1	2
Gorilla	CM055452.2	chr6_mat_hsa7	3821778	3822632	Collapse T-786	-	spacer	1	1
Gorilla	CM055452.2	chr6_mat_hsa7	3816103	3818492	Collapse T-787	+	spacer	1	1
Gorilla	CM055452.2	chr6_mat_hsa7	3824443	3826564	Collapse T-788	+	spacer	1	1
Gorilla	CM055452.2	chr6_mat_hsa7	3833530	3834750	Collapse T-789	+	spacer	1	1
Gorilla	CM055452.2	chr6_mat_hsa7	3823127	3824113	Collapse T-790	-	spacer	3	1
Gorilla	CM055452.2	chr6_mat_hsa7	3823946	3825491	Collapse T-791	-	spacer	1	1
Gorilla	CM055452.2	chr6_mat_hsa7	3824213	3825482	Collapse T-792	-	spacer	1	1
Gorilla	CM055452.2	chr6_mat_hsa7	4025012	4027409	Collapse T-793	-	spacer	2	1
Gorilla	CM055452.2	chr6_mat_hsa7	4025012	4027642	Collapse T-794	-	spacer	2	2
Gorilla	CM055452.2	chr6_mat_hsa7	4025595	4027354	Collapse T-795	-	spacer	1	1
Gorilla	CM055452.2	chr6_mat_hsa7	4030104	4032433	Collapse T-796	-	spacer	2	1
Gorilla	CM055452.2	chr6_mat_hsa7	4030291	4032146	Collapse T-797	-	spacer	2	1
Gorilla	CM055452.2	chr6_mat_hsa7	4032983	4036634	Collapse T-798	-	spacer	1	1
Gorilla	CM055452.2	chr6_mat_hsa7	4024065	4026817	Collapse T-799	+	spacer	1	1
Gorilla	CM055452.2	chr6_mat_hsa7	5515698	5517354	Collapse T-800	-	spacer	5	1
Gorilla	CM055452.2	chr6_mat_hsa7	5515854	5518993	Collapse T-801	-	spacer	1	1
Gorilla	CM055452.2	chr6_mat_hsa7	5531577	5532600	Collapse T-802	+	spacer	1	1
Gorilla	CM055452.2	chr6_mat_hsa7	5533112	5534620	Collapse T-803	-	spacer	1	1
Gorilla	CM055452.2	chr6_mat_hsa7	5537918	5540225	Collapse T-804	-	spacer	1	1
Gorilla	CM055452.2	chr6_mat_hsa7	5943935	5945129	Collapse T-805	-	spacer	1	2
Gorilla	CM055452.2	chr6_mat_hsa7	5944263	5945739	Collapse T-806	-	spacer	3	1
Gorilla	CM055452.2	chr6_mat_hsa7	5536544	5540328	Collapse T-807	+	spacer	3	1
Gorilla	CM055452.2	chr6_mat_hsa7	6077916	6078672	Collapse T-808	+	spacer	1	1
Gorilla	CM055452.2	chr6_mat_hsa7	6082191	6083537	Collapse T-809	+	spacer	1	1
Gorilla	CM055452.2	chr6_mat_hsa7	6076320	6079683	Collapse T-810	-	spacer	1	1
Gorilla	CM055452.2	chr6_mat_hsa7	6125708	6126981	Collapse T-811	-	spacer	1	1
Gorilla	CM055452.2	chr6_mat_hsa7	6126228	6127059	Collapse T-812	-	spacer	1	1
Gorilla	CM055452.2	chr6_mat_hsa7	6114229	6115133	Collapse T-813	+	spacer	1	1
Gorilla	CM055452.2	chr6_mat_hsa7	6127401	6128098	Collapse T-814	-	spacer	1	1
Gorilla	CM055452.2	chr6_mat_hsa7	6175612	6177277	Collapse T-815	-	spacer	1	1
Gorilla	CM055452.2	chr6_mat_hsa7	6131215	6134379	Collapse T-816	+	spacer	3	1
Gorilla	CM055452.2	chr6_mat_hsa7	6178714	6180262	Collapse T-817	+	spacer	2	1
Gorilla	CM055452.2	chr6_mat_hsa7	6181301	6185127	Collapse T-818	+	spacer	6	1
Gorilla	CM055446.2	chr1_pat_hsa1	2807920	2809601	Collapse T-819	+	spacer	2	1
Gorilla	CM055452.2	chr6_mat_hsa7	6177908	6183677	Collapse T-820	-	spacer	1	2
Gorilla	CM055452.2	chr6_mat_hsa7	6247682	6248456	Collapse T-821	-	spacer	1	1
Gorilla	CM055452.2	chr6_mat_hsa7	6233742	6236125	Collapse T-822	+	spacer	6	1
Gorilla	CM055452.2	chr6_mat_hsa7	6258092	6259312	Collapse T-823	+	spacer	2	1
Gorilla	CM055452.2	chr6_mat_hsa7	6248769	6253799	Collapse T-824	-	spacer	2	1
Gorilla	CM055452.2	chr6_mat_hsa7	6278364	6279634	Collapse T-825	-	spacer	1	1
Gorilla	CM055452.2	chr6_mat_hsa7	6278095	6279174	Collapse T-826	+	spacer	2	1
Gorilla	CM055446.2	chr1_pat_hsa1	2812131	2814464	Collapse T-827	+	spacer	1	1
Gorilla	CM055452.2	chr6_mat_hsa7	169337554	169338887	Collapse T-828	-	spacer	3	1
Gorilla	CM055452.2	chr6_mat_hsa7	169337554	169338364	Collapse T-829	+	spacer	1	1
Gorilla	CM055452.2	chr6_mat_hsa7	169374041	169374678	Collapse T-830	-	spacer	1	1
Gorilla	CM055452.2	chr6_mat_hsa7	169391900	169394227	Collapse T-831	-	spacer	1	1
Gorilla	CM055452.2	chr6_mat_hsa7	169379631	169381247	Collapse T-832	+	spacer	11	1
Gorilla	CM055452.2	chr6_mat_hsa7	169379832	169380804	Collapse T-833	+	spacer	1	1
Gorilla	CM055452.2	chr6_mat_hsa7	169381088	169382701	Collapse T-834	+	spacer	1	1
Gorilla	CM055452.2	chr6_mat_hsa7	169381708	169382331	Collapse T-835	+	spacer	1	1
Gorilla	CM055452.2	chr6_mat_hsa7	169403882	169404870	Collapse T-836	-	spacer	1	1
Gorilla	CM055452.2	chr6_mat_hsa7	169420676	169421634	Collapse T-837	-	spacer	1	1
Gorilla	CM055452.2	chr6_mat_hsa7	169417948	169418954	Collapse T-838	+	spacer	1	1
Gorilla	CM055452.2	chr6_mat_hsa7	169425547	169426316	Collapse T-839	-	spacer	1	1
Gorilla	CM055453.2	chr7_pat_hsa8	303999	305209	Collapse T-840	+	spacer	1	1
Gorilla	CM055453.2	chr7_pat_hsa8	511271	513549	Collapse T-841	-	spacer	2	1
Gorilla	CM055453.2	chr7_pat_hsa8	514512	515616	Collapse T-842	-	spacer	1	1
Gorilla	CM055453.2	chr7_pat_hsa8	516761	518020	Collapse T-843	-	spacer	2	1
Gorilla	CM055453.2	chr7_pat_hsa8	511609	513758	Collapse T-844	+	spacer	1	1
Gorilla	CM055453.2	chr7_pat_hsa8	521485	523171	Collapse T-845	-	spacer	2	1
Gorilla	CM055453.2	chr7_pat_hsa8	764724	765674	Collapse T-846	-	spacer	1	2
Gorilla	CM055453.2	chr7_pat_hsa8	522021	523308	Collapse T-847	+	spacer	1	1
Gorilla	CM055453.2	chr7_pat_hsa8	908546	909244	Collapse T-848	+	spacer	1	1
Gorilla	CM055453.2	chr7_pat_hsa8	1498702	1500087	Collapse T-849	+	spacer	2	1
Gorilla	CM055453.2	chr7_pat_hsa8	1512421	1514455	Collapse T-850	+	spacer	5	1
Gorilla	CM055453.2	chr7_pat_hsa8	900500	901845	Collapse T-851	-	spacer	1	1
Gorilla	CM055453.2	chr7_pat_hsa8	901008	902013	Collapse T-852	-	spacer	2	1
Gorilla	CM055453.2	chr7_pat_hsa8	901157	902719	Collapse T-853	-	spacer	2	1
Gorilla	CM055453.2	chr7_pat_hsa8	902026	903597	Collapse T-854	-	spacer	2	1
Gorilla	CM055453.2	chr7_pat_hsa8	2088981	2092301	Collapse T-855	+	spacer	1	1
Gorilla	CM055453.2	chr7_pat_hsa8	2089092	2092588	Collapse T-856	+	spacer	4	1
Gorilla	CM055453.2	chr7_pat_hsa8	2095817	2097160	Collapse T-857	+	spacer	2	1
Gorilla	CM055453.2	chr7_pat_hsa8	2097327	2098656	Collapse T-858	+	spacer	1	1
Gorilla	CM055453.2	chr7_pat_hsa8	2086813	2123986	Collapse T-859	-	spacer	8	2
Gorilla	CM055453.2	chr7_pat_hsa8	2098883	2100847	Collapse T-860	-	spacer	1	1
Gorilla	CM055453.2	chr7_pat_hsa8	2102684	2103504	Collapse T-861	-	spacer	1	1
Gorilla	CM055453.2	chr7_pat_hsa8	2086969	2090707	Collapse T-862	-	spacer	13	1
Gorilla	CM055453.2	chr7_pat_hsa8	2086969	2101282	Collapse T-863	-	spacer	1	2
Gorilla	CM055453.2	chr7_pat_hsa8	2086969	2101233	Collapse T-864	-	spacer	1	2
Gorilla	CM055453.2	chr7_pat_hsa8	2086973	2100367	Collapse T-865	-	spacer	1	2
Gorilla	CM055453.2	chr7_pat_hsa8	2087470	2089730	Collapse T-866	-	spacer	1	1
Gorilla	CM055453.2	chr7_pat_hsa8	2096752	2100201	Collapse T-867	-	spacer	1	2
Gorilla	CM055453.2	chr7_pat_hsa8	2097427	2099051	Collapse T-868	-	spacer	2	1
Gorilla	CM055453.2	chr7_pat_hsa8	2831849	2833605	Collapse T-869	-	spacer	1	1
Gorilla	CM055453.2	chr7_pat_hsa8	2832308	2833008	Collapse T-870	-	spacer	1	1
Gorilla	CM055453.2	chr7_pat_hsa8	2824750	2827971	Collapse T-871	+	spacer	5	1
Gorilla	CM055453.2	chr7_pat_hsa8	2826635	2827712	Collapse T-872	+	spacer	1	1
Gorilla	CM055453.2	chr7_pat_hsa8	2839569	2840944	Collapse T-873	-	spacer	1	1
Gorilla	CM055453.2	chr7_pat_hsa8	2839836	2841237	Collapse T-874	-	spacer	2	1
Gorilla	CM055453.2	chr7_pat_hsa8	3271613	3272820	Collapse T-875	-	spacer	1	1
Gorilla	CM055453.2	chr7_pat_hsa8	2845495	2847048	Collapse T-876	+	spacer	4	1
Gorilla	CM055453.2	chr7_pat_hsa8	4326914	4327452	Collapse T-877	+	spacer	1	1
Gorilla	CM055453.2	chr7_pat_hsa8	4330162	4332320	Collapse T-878	+	spacer	2	1
Gorilla	CM055453.2	chr7_pat_hsa8	4322848	4324498	Collapse T-879	-	spacer	2	1
Gorilla	CM055446.2	chr1_pat_hsa1	2816575	2817785	Collapse T-880	+	spacer	1	1
Gorilla	CM055446.2	chr1_pat_hsa1	3489335	3491321	Collapse T-881	+	spacer	1	1
Gorilla	CM055446.2	chr1_pat_hsa1	241809991	241810785	Collapse T-882	+	spacer	1	1
Gorilla	CM055446.2	chr1_pat_hsa1	242194612	242197776	Collapse T-883	-	spacer	7	1
Gorilla	CM055446.2	chr1_pat_hsa1	241825807	241827041	Collapse T-884	+	spacer	1	1
Gorilla	CM055446.2	chr1_pat_hsa1	242199478	242201421	Collapse T-885	-	spacer	3	1
Gorilla	CM055446.2	chr1_pat_hsa1	242213751	242215527	Collapse T-886	-	spacer	3	1
Gorilla	CM055446.2	chr1_pat_hsa1	242199648	242201829	Collapse T-887	+	spacer	2	1
Gorilla	CM055453.2	chr7_pat_hsa8	151788852	151789845	Collapse T-888	+	spacer	2	1
Gorilla	CM055453.2	chr7_pat_hsa8	151804503	151806121	Collapse T-889	+	spacer	2	1
Gorilla	CM055453.2	chr7_pat_hsa8	151809629	151811148	Collapse T-890	+	spacer	3	1
Gorilla	CM055453.2	chr7_pat_hsa8	151809671	151810685	Collapse T-891	+	spacer	2	1
Gorilla	CM055453.2	chr7_pat_hsa8	151809819	151810988	Collapse T-892	+	spacer	4	1
Gorilla	CM055453.2	chr7_pat_hsa8	151809952	151810484	Collapse T-893	+	spacer	1	1
Gorilla	CM055453.2	chr7_pat_hsa8	151811950	151813178	Collapse T-894	+	spacer	2	1
Gorilla	CM055453.2	chr7_pat_hsa8	151812489	151813412	Collapse T-895	+	spacer	1	1
Gorilla	CM055453.2	chr7_pat_hsa8	151813505	151815462	Collapse T-896	+	spacer	2	1
Gorilla	CM055453.2	chr7_pat_hsa8	151815954	151817496	Collapse T-897	+	spacer	1	1
Gorilla	CM055446.2	chr1_pat_hsa1	243044349	243045584	Collapse T-898	+	spacer	1	1
Gorilla	CM055453.2	chr7_pat_hsa8	152010700	152013207	Collapse T-899	+	spacer	1	2
Gorilla	CM055453.2	chr7_pat_hsa8	152011210	152013207	Collapse T-900	+	spacer	1	2
Gorilla	CM055453.2	chr7_pat_hsa8	152019061	152022688	Collapse T-901	+	spacer	4	2
Gorilla	CM055453.2	chr7_pat_hsa8	152019325	152022930	Collapse T-902	+	spacer	11	2
Gorilla	CM055453.2	chr7_pat_hsa8	151794022	151823929	Collapse T-903	-	spacer	2	3
Gorilla	CM055453.2	chr7_pat_hsa8	151794022	151825814	Collapse T-904	-	spacer	1	2
Gorilla	CM055453.2	chr7_pat_hsa8	151803711	151806368	Collapse T-905	-	spacer	20	1
Gorilla	CM055453.2	chr7_pat_hsa8	151821647	151823648	Collapse T-906	-	spacer	2	1
Gorilla	CM055453.2	chr7_pat_hsa8	152024826	152025526	Collapse T-907	+	spacer	1	1
Gorilla	CM055453.2	chr7_pat_hsa8	153356066	153357558	Collapse T-908	-	spacer	2	1
Gorilla	CM055453.2	chr7_pat_hsa8	153360931	153362936	Collapse T-909	-	spacer	3	1
Gorilla	CM055453.2	chr7_pat_hsa8	153607942	153609057	Collapse T-910	-	spacer	1	1
Gorilla	CM055453.2	chr7_pat_hsa8	153360546	153362839	Collapse T-911	+	spacer	1	1
Gorilla	CM055453.2	chr7_pat_hsa8	153361615	153363280	Collapse T-912	+	spacer	1	1
Gorilla	CM055453.2	chr7_pat_hsa8	153363171	153364369	Collapse T-913	+	spacer	1	1
Gorilla	CM055453.2	chr7_pat_hsa8	153363475	153364733	Collapse T-914	+	spacer	1	1
Gorilla	CM055453.2	chr7_pat_hsa8	153612806	153614449	Collapse T-915	-	spacer	1	1
Gorilla	CM055446.2	chr1_pat_hsa1	3568410	3569887	Collapse T-916	+	spacer	6	1
Gorilla	CM055446.2	chr1_pat_hsa1	243043177	243044806	Collapse T-917	-	spacer	1	1
Gorilla	CM055453.2	chr7_pat_hsa8	154603172	154604288	Collapse T-918	-	spacer	2	1
Gorilla	CM055453.2	chr7_pat_hsa8	153613913	153615157	Collapse T-919	+	spacer	1	1
Gorilla	CM055453.2	chr7_pat_hsa8	154606494	154608914	Collapse T-920	-	spacer	11	1
Gorilla	CM055453.2	chr7_pat_hsa8	154611356	154613285	Collapse T-921	-	spacer	2	1
Gorilla	CM055453.2	chr7_pat_hsa8	154625621	154626850	Collapse T-922	-	spacer	2	1
Gorilla	CM055453.2	chr7_pat_hsa8	154610635	154621244	Collapse T-923	+	spacer	1	2
Gorilla	CM055453.2	chr7_pat_hsa8	154614546	154615956	Collapse T-924	+	spacer	1	1
Gorilla	CM055453.2	chr7_pat_hsa8	154614604	154616150	Collapse T-925	+	spacer	1	1
Gorilla	CM055453.2	chr7_pat_hsa8	154630123	154631186	Collapse T-926	-	spacer	2	1
Gorilla	CM055453.2	chr7_pat_hsa8	154900734	154902717	Collapse T-927	-	spacer	2	1
Gorilla	CM055453.2	chr7_pat_hsa8	154909368	154910826	Collapse T-928	+	spacer	1	1
Gorilla	CM055446.2	chr1_pat_hsa1	243050775	243051478	Collapse T-929	+	spacer	1	1
Gorilla	CM055453.2	chr7_pat_hsa8	154904057	154906148	Collapse T-930	-	spacer	5	1
Gorilla	CM055453.2	chr7_pat_hsa8	154911292	154912859	Collapse T-931	+	spacer	1	1
Gorilla	CM055453.2	chr7_pat_hsa8	154911434	154912351	Collapse T-932	+	spacer	1	1
Gorilla	CM055453.2	chr7_pat_hsa8	154912264	154913520	Collapse T-933	+	spacer	1	1
Gorilla	CM055453.2	chr7_pat_hsa8	154923181	154925016	Collapse T-934	-	spacer	1	1
Gorilla	CM055453.2	chr7_pat_hsa8	154926608	154928672	Collapse T-935	+	spacer	2	1
Gorilla	CM055453.2	chr7_pat_hsa8	154927695	154928516	Collapse T-936	+	spacer	1	1
Gorilla	CM055453.2	chr7_pat_hsa8	154927682	154928745	Collapse T-937	-	spacer	1	1
Gorilla	CM055453.2	chr7_pat_hsa8	155330691	155332933	Collapse T-938	+	spacer	2	1
Gorilla	CM055453.2	chr7_pat_hsa8	155325719	155326770	Collapse T-939	-	spacer	2	1
Gorilla	CM055453.2	chr7_pat_hsa8	155344881	155346864	Collapse T-940	-	spacer	5	1
Gorilla	CM055453.2	chr7_pat_hsa8	155349382	155350445	Collapse T-941	-	spacer	1	1
Gorilla	CM055446.2	chr1_pat_hsa1	243321547	243322155	Collapse T-942	+	spacer	1	1
Gorilla	CM055453.2	chr7_pat_hsa8	155333803	155335182	Collapse T-943	+	spacer	1	1
Gorilla	CM055453.2	chr7_pat_hsa8	155397460	155398424	Collapse T-944	-	spacer	1	1
Gorilla	CM055453.2	chr7_pat_hsa8	155397534	155400142	Collapse T-945	+	spacer	1	3
Gorilla	CM055453.2	chr7_pat_hsa8	155406133	155407996	Collapse T-946	+	spacer	1	1
Gorilla	CM055453.2	chr7_pat_hsa8	155400782	155401934	Collapse T-947	-	spacer	1	1
Gorilla	CM055453.2	chr7_pat_hsa8	155413733	155416195	Collapse T-948	-	spacer	1	1
Gorilla	CM055453.2	chr7_pat_hsa8	155408809	155410245	Collapse T-949	+	spacer	2	1
Gorilla	CM055453.2	chr7_pat_hsa8	155419946	155421617	Collapse T-950	-	spacer	2	1
Gorilla	CM055453.2	chr7_pat_hsa8	155576560	155577694	Collapse T-951	+	spacer	1	1
Gorilla	CM055453.2	chr7_pat_hsa8	155576860	155577924	Collapse T-952	-	spacer	2	1
Gorilla	CM055446.2	chr1_pat_hsa1	243325025	243326564	Collapse T-953	+	spacer	3	1
Gorilla	CM055453.2	chr7_pat_hsa8	155756081	155759627	Collapse T-954	+	spacer	1	3
Gorilla	CM055453.2	chr7_pat_hsa8	155756945	155758318	Collapse T-955	-	spacer	2	1
Gorilla	CM055453.2	chr7_pat_hsa8	155766061	155767479	Collapse T-956	+	spacer	2	1
Gorilla	CM055453.2	chr7_pat_hsa8	155766956	155770066	Collapse T-957	+	spacer	1	1
Gorilla	CM055453.2	chr7_pat_hsa8	155767352	155768567	Collapse T-958	+	spacer	2	1
Gorilla	CM055453.2	chr7_pat_hsa8	155767370	155768419	Collapse T-959	+	spacer	1	1
Gorilla	CM055453.2	chr7_pat_hsa8	155769569	155784767	Collapse T-960	+	spacer	1	3
Gorilla	CM055453.2	chr7_pat_hsa8	155771410	155772988	Collapse T-961	+	spacer	1	1
Gorilla	CM055453.2	chr7_pat_hsa8	155784120	155784923	Collapse T-962	+	spacer	1	1
Gorilla	CM055453.2	chr7_pat_hsa8	155835405	155838789	Collapse T-963	+	spacer	1	1
Gorilla	CM055453.2	chr7_pat_hsa8	155779432	155782649	Collapse T-964	-	spacer	4	1
Gorilla	CM055453.2	chr7_pat_hsa8	155842104	155843822	Collapse T-965	-	spacer	3	1
Gorilla	CM055453.2	chr7_pat_hsa8	155838856	155841464	Collapse T-966	+	spacer	2	3
Gorilla	CM055453.2	chr7_pat_hsa8	155847040	155849316	Collapse T-967	+	spacer	4	1
Gorilla	CM055453.2	chr7_pat_hsa8	155846967	155848302	Collapse T-968	-	spacer	1	1
Gorilla	CM055453.2	chr7_pat_hsa8	155861267	155865278	Collapse T-969	-	spacer	5	1
Gorilla	CM055453.2	chr7_pat_hsa8	155849418	155850233	Collapse T-970	+	spacer	1	1
Gorilla	CM055453.2	chr7_pat_hsa8	155849756	155851567	Collapse T-971	+	spacer	2	1
Gorilla	CM055453.2	chr7_pat_hsa8	156000539	156005705	Collapse T-972	+	spacer	1	2
Gorilla	CM055453.2	chr7_pat_hsa8	156001553	156002676	Collapse T-973	+	spacer	1	1
Gorilla	CM055453.2	chr7_pat_hsa8	155989663	155990299	Collapse T-974	-	spacer	1	1
Gorilla	CM055453.2	chr7_pat_hsa8	156016034	156017464	Collapse T-975	+	spacer	2	1
Gorilla	CM055453.2	chr7_pat_hsa8	156276910	156277932	Collapse T-976	+	spacer	1	1
Gorilla	CM055453.2	chr7_pat_hsa8	156278339	156279827	Collapse T-977	+	spacer	1	1
Gorilla	CM055453.2	chr7_pat_hsa8	156278456	156279463	Collapse T-978	+	spacer	1	1
Gorilla	CM055453.2	chr7_pat_hsa8	156283572	156285332	Collapse T-979	+	spacer	1	1
Gorilla	CM055453.2	chr7_pat_hsa8	156290319	156293673	Collapse T-980	-	spacer	2	1
Gorilla	CM055453.2	chr7_pat_hsa8	156623961	156625562	Collapse T-981	-	spacer	2	1
Gorilla	CM055446.2	chr1_pat_hsa1	243066771	243067836	Collapse T-982	-	spacer	8	1
Gorilla	CM055453.2	chr7_pat_hsa8	156292794	156295810	Collapse T-983	+	spacer	2	1
Gorilla	CM055453.2	chr7_pat_hsa8	156294121	156295654	Collapse T-984	+	spacer	1	1
Gorilla	CM055453.2	chr7_pat_hsa8	156634116	156634764	Collapse T-985	+	spacer	1	1
Gorilla	CM055453.2	chr7_pat_hsa8	156634368	156635583	Collapse T-986	+	spacer	1	1
Gorilla	CM055453.2	chr7_pat_hsa8	156635310	156636746	Collapse T-987	+	spacer	1	1
Gorilla	CM055453.2	chr7_pat_hsa8	156627282	156628641	Collapse T-988	-	spacer	1	1
Gorilla	CM055453.2	chr7_pat_hsa8	156646465	156648577	Collapse T-989	-	spacer	5	1
Gorilla	CM055453.2	chr7_pat_hsa8	156640035	156641452	Collapse T-990	+	spacer	1	1
Gorilla	CM055453.2	chr7_pat_hsa8	156850108	156851381	Collapse T-991	+	spacer	2	1
Gorilla	CM055453.2	chr7_pat_hsa8	156844168	156847451	Collapse T-992	-	spacer	6	1
Gorilla	CM055453.2	chr7_pat_hsa8	156863350	156864972	Collapse T-993	-	spacer	2	1
Gorilla	CM055453.2	chr7_pat_hsa8	157296424	157297789	Collapse T-994	-	spacer	1	1
Gorilla	CM055453.2	chr7_pat_hsa8	157298056	157300836	Collapse T-995	-	spacer	2	1
Gorilla	CM055453.2	chr7_pat_hsa8	157302750	157304569	Collapse T-996	-	spacer	1	1
Gorilla	CM055453.2	chr7_pat_hsa8	156858123	156858921	Collapse T-997	+	spacer	1	1
Gorilla	CM055453.2	chr7_pat_hsa8	158017966	158020644	Collapse T-998	-	spacer	8	1
Gorilla	CM055453.2	chr7_pat_hsa8	158037025	158038037	Collapse T-999	-	spacer	1	1
Gorilla	CM055453.2	chr7_pat_hsa8	158025201	158026208	Collapse T-1000	+	spacer	3	1
Gorilla	CM055454.2	chr8_pat_hsa10	809160	814728	Collapse T-1001	+	spacer	2	1
Gorilla	CM055454.2	chr8_pat_hsa10	809160	810222	Collapse T-1002	+	spacer	1	1
Gorilla	CM055454.2	chr8_pat_hsa10	817133	818460	Collapse T-1003	-	spacer	1	1
Gorilla	CM055454.2	chr8_pat_hsa10	818187	819385	Collapse T-1004	+	spacer	2	1
Gorilla	CM055454.2	chr8_pat_hsa10	820066	820878	Collapse T-1005	+	spacer	2	1
Gorilla	CM068950.1	chr2_pat_hsa3	843834	844927	Collapse T-1006	-	spacer	1	1
Gorilla	CM055454.2	chr8_pat_hsa10	818613	822091	Collapse T-1007	-	spacer	2	1
Gorilla	CM055454.2	chr8_pat_hsa10	829969	833813	Collapse T-1008	+	spacer	3	1
Gorilla	CM055454.2	chr8_pat_hsa10	1520146	1521208	Collapse T-1009	+	spacer	1	1
Gorilla	CM055454.2	chr8_pat_hsa10	833897	834772	Collapse T-1010	-	spacer	1	1
Gorilla	CM055454.2	chr8_pat_hsa10	1537567	1538681	Collapse T-1011	-	spacer	2	1
Gorilla	CM055454.2	chr8_pat_hsa10	1530778	1532345	Collapse T-1012	+	spacer	1	1
Gorilla	CM055454.2	chr8_pat_hsa10	1542483	1544780	Collapse T-1013	+	spacer	5	1
Gorilla	CM055454.2	chr8_pat_hsa10	1546120	1548104	Collapse T-1014	+	spacer	1	1
Gorilla	CM055454.2	chr8_pat_hsa10	1829789	1830545	Collapse T-1015	+	spacer	1	1
Gorilla	CM055454.2	chr8_pat_hsa10	1835728	1836675	Collapse T-1016	+	spacer	1	1
Gorilla	CM068950.1	chr2_pat_hsa3	847035	849326	Collapse T-1017	+	spacer	3	1
Gorilla	CM055454.2	chr8_pat_hsa10	1847137	1849612	Collapse T-1018	+	spacer	4	1
Gorilla	CM055454.2	chr8_pat_hsa10	1851453	1852939	Collapse T-1019	+	spacer	1	1
Gorilla	CM055454.2	chr8_pat_hsa10	2151221	2152283	Collapse T-1020	+	spacer	1	1
Gorilla	CM055454.2	chr8_pat_hsa10	1542371	1543770	Collapse T-1021	-	spacer	1	1
Gorilla	CM055454.2	chr8_pat_hsa10	2155316	2156789	Collapse T-1022	+	spacer	4	1
Gorilla	CM055454.2	chr8_pat_hsa10	2174304	2175862	Collapse T-1023	+	spacer	2	1
Gorilla	CM055454.2	chr8_pat_hsa10	2159714	2161166	Collapse T-1024	-	spacer	1	1
Gorilla	CM055454.2	chr8_pat_hsa10	2673992	2675354	Collapse T-1025	-	spacer	1	1
Gorilla	CM055454.2	chr8_pat_hsa10	2676021	2677038	Collapse T-1026	-	spacer	2	1
Gorilla	CM055454.2	chr8_pat_hsa10	2676242	2679615	Collapse T-1027	-	spacer	4	1
Gorilla	CM055454.2	chr8_pat_hsa10	2667320	2669026	Collapse T-1028	+	spacer	1	1
Gorilla	CM068950.1	chr2_pat_hsa3	862165	863599	Collapse T-1029	+	spacer	3	1
Gorilla	CM055454.2	chr8_pat_hsa10	2895921	2896882	Collapse T-1030	-	spacer	1	1
Gorilla	CM055454.2	chr8_pat_hsa10	2898173	2899931	Collapse T-1031	-	spacer	4	1
Gorilla	CM055454.2	chr8_pat_hsa10	2884558	2886358	Collapse T-1032	+	spacer	1	1
Gorilla	CM055454.2	chr8_pat_hsa10	3213464	3215368	Collapse T-1033	+	spacer	1	2
Gorilla	CM055454.2	chr8_pat_hsa10	3223611	3224934	Collapse T-1034	+	spacer	1	1
Gorilla	CM055454.2	chr8_pat_hsa10	3221496	3222508	Collapse T-1035	-	spacer	1	1
Gorilla	CM055454.2	chr8_pat_hsa10	3222356	3223502	Collapse T-1036	-	spacer	1	1
Gorilla	CM055454.2	chr8_pat_hsa10	3222583	3223812	Collapse T-1037	-	spacer	3	1
Gorilla	CM055454.2	chr8_pat_hsa10	3227108	3229796	Collapse T-1038	+	spacer	4	1
Gorilla	CM055454.2	chr8_pat_hsa10	3227387	3228786	Collapse T-1039	-	spacer	1	1
Gorilla	CM055446.2	chr1_pat_hsa1	3587016	3588982	Collapse T-1040	+	spacer	6	1
Gorilla	CM068950.1	chr2_pat_hsa3	866967	868462	Collapse T-1041	+	spacer	1	1
Gorilla	CM055454.2	chr8_pat_hsa10	3294664	3295666	Collapse T-1042	-	spacer	1	1
Gorilla	CM055454.2	chr8_pat_hsa10	3295247	3297107	Collapse T-1043	-	spacer	1	2
Gorilla	CM055454.2	chr8_pat_hsa10	3231981	3233120	Collapse T-1044	+	spacer	1	1
Gorilla	CM055454.2	chr8_pat_hsa10	3307994	3309404	Collapse T-1045	+	spacer	1	1
Gorilla	CM055454.2	chr8_pat_hsa10	3301104	3303444	Collapse T-1046	-	spacer	1	1
Gorilla	CM055454.2	chr8_pat_hsa10	3302129	3304281	Collapse T-1047	-	spacer	2	1
Gorilla	CM055454.2	chr8_pat_hsa10	3694140	3695152	Collapse T-1048	-	spacer	2	1
Gorilla	CM055454.2	chr8_pat_hsa10	3681879	3683389	Collapse T-1049	+	spacer	1	1
Gorilla	CM055454.2	chr8_pat_hsa10	3701124	3702440	Collapse T-1050	+	spacer	1	1
Gorilla	CM055454.2	chr8_pat_hsa10	3708010	3708678	Collapse T-1051	+	spacer	1	1
Gorilla	CM055454.2	chr8_pat_hsa10	3695227	3696316	Collapse T-1052	-	spacer	1	1
Gorilla	CM055454.2	chr8_pat_hsa10	4208276	4211648	Collapse T-1053	+	spacer	5	1
Gorilla	CM068950.1	chr2_pat_hsa3	861248	863160	Collapse T-1054	-	spacer	4	1
Gorilla	CM068950.1	chr2_pat_hsa3	861693	863711	Collapse T-1055	-	spacer	1	1
Gorilla	CM055454.2	chr8_pat_hsa10	4215523	4217594	Collapse T-1056	-	spacer	1	1
Gorilla	CM055454.2	chr8_pat_hsa10	4222577	4223586	Collapse T-1057	-	spacer	1	1
Gorilla	CM055454.2	chr8_pat_hsa10	4223510	4224421	Collapse T-1058	-	spacer	1	1
Gorilla	CM055454.2	chr8_pat_hsa10	4302902	4305351	Collapse T-1059	-	spacer	1	1
Gorilla	CM055454.2	chr8_pat_hsa10	4317849	4319186	Collapse T-1060	-	spacer	2	1
Gorilla	CM055454.2	chr8_pat_hsa10	4305411	4308237	Collapse T-1061	+	spacer	5	1
Gorilla	CM055454.2	chr8_pat_hsa10	4319832	4320762	Collapse T-1062	-	spacer	1	1
Gorilla	CM055454.2	chr8_pat_hsa10	4584471	4585947	Collapse T-1063	+	spacer	2	1
Gorilla	CM055454.2	chr8_pat_hsa10	4603416	4605128	Collapse T-1064	+	spacer	2	1
Gorilla	CM055454.2	chr8_pat_hsa10	4634886	4635867	Collapse T-1065	+	spacer	1	1
Gorilla	CM055454.2	chr8_pat_hsa10	4596830	4597687	Collapse T-1066	-	spacer	1	1
Gorilla	CM055454.2	chr8_pat_hsa10	4597646	4598227	Collapse T-1067	-	spacer	1	1
Gorilla	CM055454.2	chr8_pat_hsa10	4646285	4647326	Collapse T-1068	+	spacer	1	1
Gorilla	CM055454.2	chr8_pat_hsa10	4647835	4649644	Collapse T-1069	-	spacer	1	1
Gorilla	CM055454.2	chr8_pat_hsa10	4648278	4649873	Collapse T-1070	-	spacer	1	1
Gorilla	CM068950.1	chr2_pat_hsa3	1283846	1284909	Collapse T-1071	+	spacer	3	1
Gorilla	CM055454.2	chr8_pat_hsa10	4648973	4650184	Collapse T-1072	+	spacer	1	1
Gorilla	CM055454.2	chr8_pat_hsa10	5262379	5264916	Collapse T-1073	-	spacer	1	1
Gorilla	CM055454.2	chr8_pat_hsa10	5263036	5277672	Collapse T-1074	-	spacer	1	2
Gorilla	CM055454.2	chr8_pat_hsa10	5273580	5274095	Collapse T-1075	+	spacer	1	1
Gorilla	CM055454.2	chr8_pat_hsa10	5280305	5282169	Collapse T-1076	+	spacer	1	1
Gorilla	CM055454.2	chr8_pat_hsa10	5279551	5280869	Collapse T-1077	-	spacer	1	1
Gorilla	CM055454.2	chr8_pat_hsa10	5279818	5281308	Collapse T-1078	-	spacer	1	1
Gorilla	CM055454.2	chr8_pat_hsa10	5284095	5287031	Collapse T-1079	+	spacer	6	1
Gorilla	CM055454.2	chr8_pat_hsa10	5703246	5704200	Collapse T-1080	-	spacer	1	1
Gorilla	CM055454.2	chr8_pat_hsa10	5723434	5725132	Collapse T-1081	-	spacer	1	1
Gorilla	CM068950.1	chr2_pat_hsa3	1287710	1289408	Collapse T-1082	+	spacer	2	1
Gorilla	CM055454.2	chr8_pat_hsa10	5985818	5987273	Collapse T-1083	-	spacer	1	1
Gorilla	CM055454.2	chr8_pat_hsa10	5698587	5699475	Collapse T-1084	+	spacer	1	1
Gorilla	CM055454.2	chr8_pat_hsa10	6419601	6421093	Collapse T-1085	+	spacer	4	1
Gorilla	CM055454.2	chr8_pat_hsa10	6422936	6424418	Collapse T-1086	+	spacer	1	1
Gorilla	CM055454.2	chr8_pat_hsa10	7015827	7017444	Collapse T-1087	+	spacer	2	1
Gorilla	CM055454.2	chr8_pat_hsa10	5987738	5989815	Collapse T-1088	-	spacer	1	2
Gorilla	CM055454.2	chr8_pat_hsa10	5989191	5990384	Collapse T-1089	-	spacer	2	1
Gorilla	CM055454.2	chr8_pat_hsa10	7524686	7528943	Collapse T-1090	-	spacer	6	1
Gorilla	CM055454.2	chr8_pat_hsa10	7524842	7528973	Collapse T-1091	-	spacer	7	1
Gorilla	CM055454.2	chr8_pat_hsa10	7524842	7538731	Collapse T-1092	-	spacer	1	2
Gorilla	CM055454.2	chr8_pat_hsa10	7532434	7535285	Collapse T-1093	-	spacer	1	2
Gorilla	CM055454.2	chr8_pat_hsa10	7537887	7538941	Collapse T-1094	-	spacer	1	2
Gorilla	CM055454.2	chr8_pat_hsa10	7526008	7530178	Collapse T-1095	+	spacer	5	1
Gorilla	CM068950.1	chr2_pat_hsa3	1284575	1286149	Collapse T-1096	-	spacer	1	1
Gorilla	CM055454.2	chr8_pat_hsa10	7540012	7542055	Collapse T-1097	-	spacer	1	1
Gorilla	CM055454.2	chr8_pat_hsa10	7540661	7542022	Collapse T-1098	-	spacer	9	1
Gorilla	CM055454.2	chr8_pat_hsa10	7540928	7542082	Collapse T-1099	-	spacer	9	1
Gorilla	CM055454.2	chr8_pat_hsa10	7545614	7548144	Collapse T-1100	+	spacer	5	1
Gorilla	CM055454.2	chr8_pat_hsa10	7545734	7546796	Collapse T-1101	-	spacer	1	1
Gorilla	CM055454.2	chr8_pat_hsa10	7638309	7639968	Collapse T-1102	+	spacer	1	1
Gorilla	CM055454.2	chr8_pat_hsa10	8166323	8167673	Collapse T-1103	-	spacer	1	1
Gorilla	CM055454.2	chr8_pat_hsa10	8166429	8167166	Collapse T-1104	-	spacer	1	1
Gorilla	CM055454.2	chr8_pat_hsa10	8166797	8167549	Collapse T-1105	-	spacer	1	1
Gorilla	CM055454.2	chr8_pat_hsa10	8166948	8168511	Collapse T-1106	-	spacer	2	2
Gorilla	CM055454.2	chr8_pat_hsa10	8167657	8169709	Collapse T-1107	-	spacer	2	1
Gorilla	CM055454.2	chr8_pat_hsa10	8167870	8171369	Collapse T-1108	-	spacer	12	1
Gorilla	CM055454.2	chr8_pat_hsa10	8168323	8169576	Collapse T-1109	-	spacer	6	1
Gorilla	CM055454.2	chr8_pat_hsa10	8168481	8170058	Collapse T-1110	-	spacer	2	1
Gorilla	CM068950.1	chr2_pat_hsa3	1307528	1308561	Collapse T-1111	+	spacer	3	1
Gorilla	CM055454.2	chr8_pat_hsa10	7657758	7659166	Collapse T-1112	+	spacer	2	1
Gorilla	CM068950.1	chr2_pat_hsa3	1326697	1328426	Collapse T-1113	+	spacer	1	1
Gorilla	CM068950.1	chr2_pat_hsa3	1321211	1322485	Collapse T-1114	-	spacer	7	1
Gorilla	CM068950.1	chr2_pat_hsa3	1321453	1322387	Collapse T-1115	-	spacer	1	1
Gorilla	CM068950.1	chr2_pat_hsa3	1321654	1322446	Collapse T-1116	-	spacer	1	1
Gorilla	CM068950.1	chr2_pat_hsa3	1781240	1782237	Collapse T-1117	+	spacer	1	1
Gorilla	CM068950.1	chr2_pat_hsa3	1788756	1790350	Collapse T-1118	-	spacer	1	1
Gorilla	CM055446.2	chr1_pat_hsa1	3479849	3481267	Collapse T-1119	-	spacer	1	1
Gorilla	CM068950.1	chr2_pat_hsa3	1789592	1790560	Collapse T-1120	+	spacer	1	1
Gorilla	CM068950.1	chr2_pat_hsa3	1941541	1942937	Collapse T-1121	-	spacer	1	1
Gorilla	CM068950.1	chr2_pat_hsa3	1941726	1943161	Collapse T-1122	-	spacer	1	1
Gorilla	CM068950.1	chr2_pat_hsa3	1942893	1943874	Collapse T-1123	-	spacer	1	1
Gorilla	CM068950.1	chr2_pat_hsa3	1963575	1964704	Collapse T-1124	-	spacer	1	1
Gorilla	CM068950.1	chr2_pat_hsa3	1963842	1965309	Collapse T-1125	-	spacer	1	1
Gorilla	CM068950.1	chr2_pat_hsa3	1953068	1954519	Collapse T-1126	+	spacer	1	1
Gorilla	CM068950.1	chr2_pat_hsa3	1989069	1990912	Collapse T-1127	+	spacer	1	1
Gorilla	CM068950.1	chr2_pat_hsa3	1992505	1994240	Collapse T-1128	+	spacer	1	1
Gorilla	CM068950.1	chr2_pat_hsa3	1968647	1970201	Collapse T-1129	-	spacer	1	1
Gorilla	CM068950.1	chr2_pat_hsa3	2440107	2441962	Collapse T-1130	+	spacer	1	1
Gorilla	CM068950.1	chr2_pat_hsa3	2591934	2593321	Collapse T-1131	+	spacer	5	1
Gorilla	CM068950.1	chr2_pat_hsa3	2446341	2447980	Collapse T-1132	-	spacer	2	1
Gorilla	CM055446.2	chr1_pat_hsa1	1131399	1132796	Collapse T-1133	+	spacer	1	1
Gorilla	CM055446.2	chr1_pat_hsa1	3591030	3592311	Collapse T-1134	+	spacer	3	1
Gorilla	CM068950.1	chr2_pat_hsa3	2597237	2597836	Collapse T-1135	+	spacer	1	1
Gorilla	CM068950.1	chr2_pat_hsa3	2597524	2598097	Collapse T-1136	-	spacer	1	1
Gorilla	CM068950.1	chr2_pat_hsa3	2614378	2615593	Collapse T-1137	+	spacer	1	1
Gorilla	CM068950.1	chr2_pat_hsa3	2624915	2625711	Collapse T-1138	-	spacer	3	1
Gorilla	CM068950.1	chr2_pat_hsa3	2634353	2638735	Collapse T-1139	-	spacer	1	2
Gorilla	CM068950.1	chr2_pat_hsa3	2635456	2638981	Collapse T-1140	-	spacer	1	1
Gorilla	CM068950.1	chr2_pat_hsa3	2634070	2635450	Collapse T-1141	+	spacer	1	1
Gorilla	CM068950.1	chr2_pat_hsa3	2650635	2651981	Collapse T-1142	+	spacer	2	1
Gorilla	CM068950.1	chr2_pat_hsa3	3383093	3386411	Collapse T-1143	+	spacer	1	1
Gorilla	CM068950.1	chr2_pat_hsa3	2644768	2645645	Collapse T-1144	-	spacer	3	1
Gorilla	CM055454.2	chr8_pat_hsa10	147943252	147944640	Collapse T-1145	+	spacer	1	1
Gorilla	CM055454.2	chr8_pat_hsa10	147948459	147954068	Collapse T-1146	+	spacer	12	1
Gorilla	CM055454.2	chr8_pat_hsa10	147952034	147952908	Collapse T-1147	+	spacer	1	1
Gorilla	CM055454.2	chr8_pat_hsa10	147952581	147955417	Collapse T-1148	+	spacer	1	1
Gorilla	CM055454.2	chr8_pat_hsa10	147952863	147955231	Collapse T-1149	+	spacer	3	1
Gorilla	CM055454.2	chr8_pat_hsa10	147953114	147953912	Collapse T-1150	+	spacer	1	1
Gorilla	CM055454.2	chr8_pat_hsa10	147953333	147954432	Collapse T-1151	+	spacer	1	1
Gorilla	CM055454.2	chr8_pat_hsa10	147953415	147955778	Collapse T-1152	-	spacer	3	1
Gorilla	CM055454.2	chr8_pat_hsa10	147958563	147961166	Collapse T-1153	-	spacer	1	1
Gorilla	CM055454.2	chr8_pat_hsa10	147960198	147961609	Collapse T-1154	-	spacer	4	1
Gorilla	CM055454.2	chr8_pat_hsa10	147956052	147959927	Collapse T-1155	+	spacer	1	2
Gorilla	CM055454.2	chr8_pat_hsa10	147956231	147959927	Collapse T-1156	+	spacer	1	1
Gorilla	CM055454.2	chr8_pat_hsa10	147956551	147958474	Collapse T-1157	+	spacer	2	2
Gorilla	CM055454.2	chr8_pat_hsa10	147959613	147960509	Collapse T-1158	+	spacer	1	1
Gorilla	CM055454.2	chr8_pat_hsa10	147960147	147960969	Collapse T-1159	+	spacer	1	1
Gorilla	CM055454.2	chr8_pat_hsa10	147964829	147968185	Collapse T-1160	-	spacer	22	1
Gorilla	CM055454.2	chr8_pat_hsa10	147967782	147970319	Collapse T-1161	+	spacer	1	1
Gorilla	CM055454.2	chr8_pat_hsa10	147968772	147970163	Collapse T-1162	+	spacer	1	1
Gorilla	CM068950.1	chr2_pat_hsa3	3396726	3397767	Collapse T-1163	+	spacer	1	1
Gorilla	CM055454.2	chr8_pat_hsa10	148635933	148637760	Collapse T-1164	-	spacer	9	1
Gorilla	CM055454.2	chr8_pat_hsa10	148635314	148638342	Collapse T-1165	+	spacer	1	1
Gorilla	CM055454.2	chr8_pat_hsa10	148640795	148642513	Collapse T-1166	-	spacer	3	1
Gorilla	CM055454.2	chr8_pat_hsa10	148655039	148656434	Collapse T-1167	-	spacer	2	1
Gorilla	CM055454.2	chr8_pat_hsa10	148641498	148642741	Collapse T-1168	+	spacer	1	1
Gorilla	CM055454.2	chr8_pat_hsa10	149037381	149038966	Collapse T-1169	+	spacer	3	1
Gorilla	CM055454.2	chr8_pat_hsa10	149037981	149039187	Collapse T-1170	+	spacer	1	1
Gorilla	CM055454.2	chr8_pat_hsa10	149038895	149039884	Collapse T-1171	+	spacer	2	1
Gorilla	CM055454.2	chr8_pat_hsa10	149039253	149040051	Collapse T-1172	+	spacer	1	1
Gorilla	CM055454.2	chr8_pat_hsa10	149040699	149041452	Collapse T-1173	+	spacer	1	1
Gorilla	CM055454.2	chr8_pat_hsa10	149040952	149043483	Collapse T-1174	+	spacer	2	1
Gorilla	CM055446.2	chr1_pat_hsa1	4436577	4438420	Collapse T-1175	+	spacer	3	1
Gorilla	CM068950.1	chr2_pat_hsa3	3399775	3400629	Collapse T-1176	+	spacer	2	1
Gorilla	CM055454.2	chr8_pat_hsa10	149031747	149033154	Collapse T-1177	-	spacer	1	1
Gorilla	CM055454.2	chr8_pat_hsa10	149046353	149047455	Collapse T-1178	+	spacer	1	1
Gorilla	CM055454.2	chr8_pat_hsa10	149050188	149051785	Collapse T-1179	-	spacer	1	1
Gorilla	CM055454.2	chr8_pat_hsa10	149898179	149900773	Collapse T-1180	-	spacer	3	1
Gorilla	CM055454.2	chr8_pat_hsa10	150269196	150272148	Collapse T-1181	-	spacer	8	1
Gorilla	CM055454.2	chr8_pat_hsa10	150669167	150670330	Collapse T-1182	-	spacer	1	1
Gorilla	CM055454.2	chr8_pat_hsa10	149054668	149055792	Collapse T-1183	+	spacer	1	1
Gorilla	CM055454.2	chr8_pat_hsa10	149055102	149055952	Collapse T-1184	+	spacer	1	1
Gorilla	CM055455.2	chr9_pat_hsa11	601379	602498	Collapse T-1185	-	spacer	1	1
Gorilla	CM055455.2	chr9_pat_hsa11	602036	604236	Collapse T-1186	-	spacer	2	1
Gorilla	CM055455.2	chr9_pat_hsa11	602754	604641	Collapse T-1187	-	spacer	1	1
Gorilla	CM055455.2	chr9_pat_hsa11	613494	615155	Collapse T-1188	-	spacer	1	1
Gorilla	CM055455.2	chr9_pat_hsa11	617097	624840	Collapse T-1189	-	spacer	1	1
Gorilla	CM055455.2	chr9_pat_hsa11	617966	620773	Collapse T-1190	-	spacer	2	1
Gorilla	CM055455.2	chr9_pat_hsa11	622832	623633	Collapse T-1191	-	spacer	1	1
Gorilla	CM068950.1	chr2_pat_hsa3	3396827	3397561	Collapse T-1192	-	spacer	1	1
Gorilla	CM068950.1	chr2_pat_hsa3	3397297	3398449	Collapse T-1193	-	spacer	1	1
Gorilla	CM068950.1	chr2_pat_hsa3	3398011	3398863	Collapse T-1194	-	spacer	1	1
Gorilla	CM055455.2	chr9_pat_hsa11	604666	607162	Collapse T-1195	+	spacer	2	1
Gorilla	CM055455.2	chr9_pat_hsa11	605690	606864	Collapse T-1196	+	spacer	1	1
Gorilla	CM055455.2	chr9_pat_hsa11	656210	658423	Collapse T-1197	+	spacer	2	1
Gorilla	CM055455.2	chr9_pat_hsa11	635065	666690	Collapse T-1198	-	spacer	4	2
Gorilla	CM055455.2	chr9_pat_hsa11	648729	649973	Collapse T-1199	-	spacer	1	1
Gorilla	CM055455.2	chr9_pat_hsa11	1243294	1244786	Collapse T-1200	-	spacer	1	1
Gorilla	CM055455.2	chr9_pat_hsa11	1245544	1246913	Collapse T-1201	-	spacer	6	1
Gorilla	CM055455.2	chr9_pat_hsa11	1320004	1321289	Collapse T-1202	-	spacer	1	1
Gorilla	CM055455.2	chr9_pat_hsa11	1250872	1252750	Collapse T-1203	+	spacer	1	1
Gorilla	CM055455.2	chr9_pat_hsa11	1322252	1323430	Collapse T-1204	-	spacer	3	1
Gorilla	CM055455.2	chr9_pat_hsa11	1322697	1323722	Collapse T-1205	-	spacer	2	1
Gorilla	CM055455.2	chr9_pat_hsa11	1404001	1406210	Collapse T-1206	-	spacer	1	2
Gorilla	CM055455.2	chr9_pat_hsa11	1404350	1405733	Collapse T-1207	-	spacer	1	1
Gorilla	CM068950.1	chr2_pat_hsa3	3424838	3425901	Collapse T-1208	+	spacer	1	1
Gorilla	CM055455.2	chr9_pat_hsa11	1327151	1329460	Collapse T-1209	+	spacer	5	1
Gorilla	CM055455.2	chr9_pat_hsa11	1406332	1407193	Collapse T-1210	-	spacer	1	1
Gorilla	CM055455.2	chr9_pat_hsa11	1406599	1407699	Collapse T-1211	-	spacer	1	1
Gorilla	CM055455.2	chr9_pat_hsa11	1935912	1937120	Collapse T-1212	-	spacer	1	2
Gorilla	CM055455.2	chr9_pat_hsa11	1926621	1927483	Collapse T-1213	+	spacer	1	1
Gorilla	CM055455.2	chr9_pat_hsa11	2480189	2481170	Collapse T-1214	+	spacer	1	1
Gorilla	CM055455.2	chr9_pat_hsa11	2475833	2476853	Collapse T-1215	-	spacer	1	1
Gorilla	CM055455.2	chr9_pat_hsa11	2483073	2484228	Collapse T-1216	+	spacer	1	1
Gorilla	CM055455.2	chr9_pat_hsa11	2493474	2495360	Collapse T-1217	+	spacer	7	1
Gorilla	CM055455.2	chr9_pat_hsa11	2493949	2495193	Collapse T-1218	+	spacer	1	1
Gorilla	CM055455.2	chr9_pat_hsa11	3229953	3232071	Collapse T-1219	+	spacer	3	1
Gorilla	CM055455.2	chr9_pat_hsa11	2493069	2494244	Collapse T-1220	-	spacer	2	1
Gorilla	CM055455.2	chr9_pat_hsa11	2493510	2497606	Collapse T-1221	-	spacer	1	1
Gorilla	CM068950.1	chr2_pat_hsa3	3442719	3444652	Collapse T-1222	+	spacer	2	1
Gorilla	CM055455.2	chr9_pat_hsa11	3325255	3326226	Collapse T-1223	+	spacer	1	1
Gorilla	CM055455.2	chr9_pat_hsa11	3333020	3334300	Collapse T-1224	+	spacer	1	1
Gorilla	CM055455.2	chr9_pat_hsa11	3330866	3332203	Collapse T-1225	-	spacer	2	1
Gorilla	CM055455.2	chr9_pat_hsa11	3680368	3684310	Collapse T-1226	+	spacer	4	1
Gorilla	CM055455.2	chr9_pat_hsa11	3682249	3684310	Collapse T-1227	+	spacer	1	2
Gorilla	CM055455.2	chr9_pat_hsa11	3702352	3703454	Collapse T-1228	+	spacer	2	1
Gorilla	CM055455.2	chr9_pat_hsa11	3696238	3696963	Collapse T-1229	-	spacer	1	1
Gorilla	CM055455.2	chr9_pat_hsa11	3967672	3970456	Collapse T-1230	+	spacer	1	2
Gorilla	CM055455.2	chr9_pat_hsa11	3968202	3969901	Collapse T-1231	-	spacer	1	1
Gorilla	CM055455.2	chr9_pat_hsa11	3970980	3971948	Collapse T-1232	+	spacer	1	1
Gorilla	CM068950.1	chr2_pat_hsa3	3440608	3441984	Collapse T-1233	-	spacer	1	1
Gorilla	CM068950.1	chr2_pat_hsa3	3441273	3442977	Collapse T-1234	-	spacer	6	1
Gorilla	CM068950.1	chr2_pat_hsa3	3441428	3442465	Collapse T-1235	-	spacer	1	1
Gorilla	CM055455.2	chr9_pat_hsa11	3976580	3979132	Collapse T-1236	-	spacer	1	1
Gorilla	CM055455.2	chr9_pat_hsa11	3977606	3978762	Collapse T-1237	-	spacer	2	1
Gorilla	CM055455.2	chr9_pat_hsa11	4520904	4521983	Collapse T-1238	-	spacer	1	1
Gorilla	CM055455.2	chr9_pat_hsa11	4512340	4515951	Collapse T-1239	+	spacer	2	1
Gorilla	CM055455.2	chr9_pat_hsa11	4533399	4535060	Collapse T-1240	+	spacer	3	1
Gorilla	CM055455.2	chr9_pat_hsa11	4527577	4528356	Collapse T-1241	-	spacer	1	1
Gorilla	CM055455.2	chr9_pat_hsa11	4527844	4528939	Collapse T-1242	-	spacer	1	1
Gorilla	CM068950.1	chr2_pat_hsa3	3778515	3779167	Collapse T-1243	-	spacer	1	1
Gorilla	CM068950.1	chr2_pat_hsa3	3452202	3452838	Collapse T-1244	+	spacer	1	1
Gorilla	CM068950.1	chr2_pat_hsa3	3805492	3806450	Collapse T-1245	-	spacer	1	1
Gorilla	CM068950.1	chr2_pat_hsa3	3874847	3876128	Collapse T-1246	-	spacer	1	1
Gorilla	CM068950.1	chr2_pat_hsa3	3896403	3897430	Collapse T-1247	-	spacer	1	1
Gorilla	CM068950.1	chr2_pat_hsa3	3908382	3909821	Collapse T-1248	-	spacer	4	1
Gorilla	CM068950.1	chr2_pat_hsa3	3850749	3853045	Collapse T-1249	+	spacer	1	1
Gorilla	CM068950.1	chr2_pat_hsa3	4142461	4143508	Collapse T-1250	-	spacer	2	1
Gorilla	CM068950.1	chr2_pat_hsa3	4142617	4157861	Collapse T-1251	-	spacer	2	2
Gorilla	CM068950.1	chr2_pat_hsa3	4157432	4158365	Collapse T-1252	-	spacer	1	1
Gorilla	CM068950.1	chr2_pat_hsa3	4145936	4147954	Collapse T-1253	+	spacer	5	1
Gorilla	CM068950.1	chr2_pat_hsa3	4146294	4147791	Collapse T-1254	+	spacer	1	1
Gorilla	CM068950.1	chr2_pat_hsa3	4159902	4161233	Collapse T-1255	-	spacer	1	1
Gorilla	CM068950.1	chr2_pat_hsa3	4160144	4161840	Collapse T-1256	-	spacer	1	1
Gorilla	CM068950.1	chr2_pat_hsa3	4164532	4167116	Collapse T-1257	+	spacer	4	1
Gorilla	CM068950.1	chr2_pat_hsa3	4658820	4660229	Collapse T-1258	+	spacer	3	1
Gorilla	CM068950.1	chr2_pat_hsa3	4164684	4165639	Collapse T-1259	-	spacer	1	1
Gorilla	CM068950.1	chr2_pat_hsa3	4670868	4671627	Collapse T-1260	+	spacer	1	1
Gorilla	CM068950.1	chr2_pat_hsa3	4733115	4734567	Collapse T-1261	+	spacer	1	1
Gorilla	CM068950.1	chr2_pat_hsa3	4738161	4739225	Collapse T-1262	+	spacer	1	1
Gorilla	CM068950.1	chr2_pat_hsa3	4731321	4733408	Collapse T-1263	-	spacer	1	1
Gorilla	CM055455.2	chr9_pat_hsa11	144277309	144278402	Collapse T-1264	-	spacer	2	1
Gorilla	CM055455.2	chr9_pat_hsa11	144290257	144291222	Collapse T-1265	-	spacer	1	1
Gorilla	CM055455.2	chr9_pat_hsa11	144296230	144298227	Collapse T-1266	-	spacer	1	1
Gorilla	CM055455.2	chr9_pat_hsa11	144275403	144276257	Collapse T-1267	+	spacer	1	1
Gorilla	CM055455.2	chr9_pat_hsa11	144276576	144278084	Collapse T-1268	+	spacer	1	1
Gorilla	CM055455.2	chr9_pat_hsa11	144280711	144284525	Collapse T-1269	+	spacer	38	1
Gorilla	CM055455.2	chr9_pat_hsa11	144281406	144284525	Collapse T-1270	+	spacer	1	2
Gorilla	CM055455.2	chr9_pat_hsa11	144281649	144284523	Collapse T-1271	+	spacer	1	2
Gorilla	CM055455.2	chr9_pat_hsa11	144281759	144284748	Collapse T-1272	+	spacer	3	1
Gorilla	CM055455.2	chr9_pat_hsa11	144284621	144285697	Collapse T-1273	+	spacer	3	1
Gorilla	CM055455.2	chr9_pat_hsa11	144285515	144286772	Collapse T-1274	+	spacer	3	1
Gorilla	CM055455.2	chr9_pat_hsa11	144286073	144286995	Collapse T-1275	+	spacer	1	2
Gorilla	CM055455.2	chr9_pat_hsa11	144286185	144287204	Collapse T-1276	+	spacer	1	1
Gorilla	CM055455.2	chr9_pat_hsa11	144289761	144292063	Collapse T-1277	+	spacer	4	2
Gorilla	CM055455.2	chr9_pat_hsa11	144291134	144292063	Collapse T-1278	+	spacer	1	1
Gorilla	CM055455.2	chr9_pat_hsa11	144298624	144301567	Collapse T-1279	+	spacer	6	1
Gorilla	CM055455.2	chr9_pat_hsa11	144298850	144301723	Collapse T-1280	+	spacer	4	1
Gorilla	CM055455.2	chr9_pat_hsa11	144299075	144301073	Collapse T-1281	+	spacer	1	1
Gorilla	CM068950.1	chr2_pat_hsa3	5608531	5611448	Collapse T-1282	-	spacer	3	1
Gorilla	CM068950.1	chr2_pat_hsa3	5624644	5632729	Collapse T-1283	-	spacer	2	3
Gorilla	CM068950.1	chr2_pat_hsa3	5627247	5630472	Collapse T-1284	-	spacer	1	1
Gorilla	CM055455.2	chr9_pat_hsa11	144812508	144816460	Collapse T-1285	-	spacer	3	1
Gorilla	CM055455.2	chr9_pat_hsa11	144824477	144825272	Collapse T-1286	-	spacer	2	1
Gorilla	CM055455.2	chr9_pat_hsa11	144835403	144836470	Collapse T-1287	-	spacer	1	1
Gorilla	CM055455.2	chr9_pat_hsa11	144800556	144836238	Collapse T-1288	+	spacer	1	3
Gorilla	CM055455.2	chr9_pat_hsa11	144822584	144824248	Collapse T-1289	+	spacer	1	1
Gorilla	CM055455.2	chr9_pat_hsa11	144824930	144826284	Collapse T-1290	+	spacer	1	1
Gorilla	CM055455.2	chr9_pat_hsa11	145385722	145422599	Collapse T-1291	-	spacer	2	2
Gorilla	CM055455.2	chr9_pat_hsa11	145401028	145402434	Collapse T-1292	-	spacer	2	1
Gorilla	CM055455.2	chr9_pat_hsa11	145419264	145420682	Collapse T-1293	-	spacer	1	1
Gorilla	CM055455.2	chr9_pat_hsa11	145412236	145414220	Collapse T-1294	+	spacer	1	2
Gorilla	CM055455.2	chr9_pat_hsa11	145453443	145455298	Collapse T-1295	-	spacer	5	1
Gorilla	CM055455.2	chr9_pat_hsa11	145453443	145457727	Collapse T-1296	-	spacer	1	2
Gorilla	CM055455.2	chr9_pat_hsa11	145604621	145605573	Collapse T-1297	+	spacer	1	1
Gorilla	CM055455.2	chr9_pat_hsa11	145603664	145605440	Collapse T-1298	-	spacer	1	1
Gorilla	CM055455.2	chr9_pat_hsa11	145611291	145612574	Collapse T-1299	+	spacer	2	1
Gorilla	CM055455.2	chr9_pat_hsa11	145619646	145622411	Collapse T-1300	+	spacer	1	1
Gorilla	CM055455.2	chr9_pat_hsa11	145612262	145614751	Collapse T-1301	-	spacer	1	1
Gorilla	CM055455.2	chr9_pat_hsa11	145720050	145721131	Collapse T-1302	+	spacer	1	1
Gorilla	CM055455.2	chr9_pat_hsa11	145883762	145884629	Collapse T-1303	+	spacer	1	1
Gorilla	CM055455.2	chr9_pat_hsa11	145885913	145887323	Collapse T-1304	+	spacer	1	1
Gorilla	CM055455.2	chr9_pat_hsa11	145885990	145886630	Collapse T-1305	+	spacer	1	1
Gorilla	CM055455.2	chr9_pat_hsa11	145888682	145889594	Collapse T-1306	+	spacer	1	1
Gorilla	CM055455.2	chr9_pat_hsa11	145726464	145728953	Collapse T-1307	-	spacer	1	1
Gorilla	CM068950.1	chr2_pat_hsa3	6553616	6555185	Collapse T-1308	+	spacer	2	1
Gorilla	CM055455.2	chr9_pat_hsa11	147020841	147021953	Collapse T-1309	-	spacer	1	1
Gorilla	CM055455.2	chr9_pat_hsa11	147028250	147032646	Collapse T-1310	-	spacer	3	2
Gorilla	CM055455.2	chr9_pat_hsa11	147068612	147087873	Collapse T-1311	+	spacer	1	2
Gorilla	CM055455.2	chr9_pat_hsa11	147086709	147088693	Collapse T-1312	+	spacer	3	1
Gorilla	CM055455.2	chr9_pat_hsa11	147086837	147087786	Collapse T-1313	+	spacer	2	1
Gorilla	CM055455.2	chr9_pat_hsa11	147087392	147088522	Collapse T-1314	+	spacer	1	1
Gorilla	CM055455.2	chr9_pat_hsa11	147239314	147240126	Collapse T-1315	+	spacer	1	1
Gorilla	CM055455.2	chr9_pat_hsa11	147237716	147240064	Collapse T-1316	-	spacer	1	1
Gorilla	CM055455.2	chr9_pat_hsa11	147255684	147257825	Collapse T-1317	-	spacer	1	1
[truncated: 4,681 more rows]

## Sheet: 6
Species	Chromosome	Chromosome number	Start	End	Region	Gene	Coverage	Transcripts per million (TPM)
AG18354_PTR	CM054434.2	chr1_hap1_hsa1	31411	108824	CM054434.2:31411-108824	F157B	876.648	21.1578
AG18354_PTR	CM054434.2	chr1_hap1_hsa1	231104018	231165239	CM054434.2:231104018-231165239	TBCD	43.4121	2.08935
AG18354_PTR	CM054438.2	chr4_hap1_hsa5	153757	178471	CM054438.2:153757-178471	SPTN4	13.6101	0.311442
AG18354_PTR	CM054438.2	chr4_hap1_hsa5	180221	190423	CM054438.2:180221-190423	PLA2G4B	72.2824	1.65405
AG18354_PTR	CM054438.2	chr4_hap1_hsa5	178909376	178932011	CM054438.2:178909376-178932011	F157B	1533.59	36.8811
AG18354_PTR	CM054439.2	chr5_hap1_hsa6	5912713	5936509	CM054439.2:5912713-5936509	SPTN4	0.687324	0.015728
AG18354_PTR	CM054439.2	chr5_hap1_hsa6	5936736	5946954	CM054439.2:5936736-5946954	PLA2G4B	33.5774	0.768358
AG18354_PTR	CM054439.2	chr5_hap1_hsa6	6050817	6066583	CM054439.2:6050817-6066583	PRDM7	3.71731	0.085064
AG18354_PTR	CM054439.2	chr5_hap1_hsa6	182727323	182785541	CM054439.2:182727323-182785541	ZNG1A	287.685	12.6938
AG18354_PTR	CM054439.2	chr5_hap1_hsa6	182747893	182775156	CM054439.2:182747893-182775156	CBWD1	41.8732	2.24742
AG18354_PTR	CM054439.2	chr5_hap1_hsa6	183141371	183151637	CM054439.2:183141371-183151637	PLA2G4B	182.022	4.19487
AG18354_PTR	CM054439.2	chr5_hap1_hsa6	183151749	183177716	CM054439.2:183151749-183177716	SPTN4	153.526	4.10771
AG18354_PTR	CM054440.2	chr6_hap1_hsa7	5821634	5846848	CM054440.2:5821634-5846848	SPTN4	1.65908	0.037965
AG18354_PTR	CM054440.2	chr6_hap1_hsa7	112088208	112094351	CM054440.2:112088208-112094351	UPK3B	237.724	5.43989
AG18354_PTR	CM054440.2	chr6_hap1_hsa7	112103576	112112828	CM054440.2:112103576-112112828	SPD21	99.3309	4.0203
AG18354_PTR	CM054441.2	chr7_hap1_hsa8	155452346	155522060	CM054441.2:155452346-155522060	TRI52	72.8992	10.4398
AG18354_PTR	CM054441.2	chr7_hap1_hsa8	155452411	155459089	CM054441.2:155452411-155459089	TRIM52	149.601	5.29588
AG18354_PTR	CM054442.2	chr8_hap1_hsa10	12780435	12808471	CM054442.2:12780435-12808471	TRI52	0	0
AG18354_PTR	CM054442.2	chr8_hap1_hsa10	12801772	12808431	CM054442.2:12801772-12808431	TRIM52	230.933	7.49144
AG18354_PTR	CM054445.2	chr11_hap1_hsa9	89549	113239	CM054445.2:89549-113239	PRDM7	2.98523	0.125623
AG18354_PTR	CM054446.2	chr12_hap1_hsa2a	9762783	9778236	CM054446.2:9762783-9778236	CHAP1	85.64	5.26047
AG18354_PTR	CM054446.2	chr12_hap1_hsa2a	9784264	9809756	CM054446.2:9784264-9809756	SPTN4	0.906189	0.020737
AG18354_PTR	CM054446.2	chr12_hap1_hsa2a	9811146	9821384	CM054446.2:9811146-9821384	PLA2G4B	158.929	3.64258
AG18354_PTR	CM054447.2	chr13_hap1_hsa2b	14222485	14250490	CM054447.2:14222485-14250490	SPTN4	1.23256	0.028205
AG18354_PTR	CM054447.2	chr13_hap1_hsa2b	14250706	14260974	CM054447.2:14250706-14260974	PLA2G4B	223.057	5.10766
AG18354_PTR	CM054447.2	chr13_hap1_hsa2b	14298055	14300599	CM054447.2:14298055-14300599	FOXD4L1	192.315	4.40078
AG18354_PTR	CM054447.2	chr13_hap1_hsa2b	14298477	14306980	CM054447.2:14298477-14306980	FX4L1	0	0
AG18354_PTR	CM054447.2	chr13_hap1_hsa2b	144334621	144352521	CM054447.2:144334621-144352521	PRDM7	8.67575	0.198529
AG18354_PTR	CM054448.2	chr14_hap1_hsa13	9124535	9128180	CM054448.2:9124535-9128180	SWAHC	0	0
AG18354_PTR	CM054448.2	chr14_hap1_hsa13	120000116	120006087	CM054448.2:120000116-120006087	ZNG1A	0	0
AG18354_PTR	CM054449.2	chr15_hap1_hsa14	15050230	15054533	CM054449.2:15050230-15054533	MYO5B	0.269284	0.006162
AG18354_PTR	CM054449.2	chr15_hap1_hsa14	103629184	103635943	CM054449.2:103629184-103635943	IGHE	31.6101	0.72334
AG18354_PTR	CM054450.2	chr16_hap1_hsa15	5102667	5112764	CM054450.2:5102667-5112764	SWAHC	62.6668	1.43402
AG18354_PTR	CM054451.2	chr17_hap1_hsa18	7737900	7741998	CM054451.2:7737900-7741998	SWAHC	0	0
AG18354_PTR	CM054451.2	chr17_hap1_hsa18	90644283	90668370	CM054451.2:90644283-90668370	F157B	1035.19	31.7337
AG18354_PTR	CM054452.2	chr18_hap1_hsa16	4222791	4232793	CM054452.2:4222791-4232793	FAHD1	2032.85	68.7544
AG18354_PTR	CM054452.2	chr18_hap1_hsa16	88347194	88352761	CM054452.2:88347194-88352761	SPTN4	2.18442	0.049987
AG18354_PTR	CM054452.2	chr18_hap1_hsa16	88354223	88357262	CM054452.2:88354223-88357262	SPTN4	0.131498	0.003009
AG18354_PTR	CM054454.2	chr20_hap1_hsa19	59616653	59745309	CM054454.2:59616653-59745309	OR4L1	123.283	8.25507
AG18354_PTR	CM054455.2	chr21_hap1_hsa20	70670274	70680489	CM054455.2:70670274-70680489	PLA2G4B	176.962	4.05541
AG18354_PTR	CM054455.2	chr21_hap1_hsa20	70680785	70707122	CM054455.2:70680785-70707122	SPTN4	5.97475	0.136721
AG18354_PTR	CM054456.2	chr22_hap1_hsa21	47372419	47404499	CM054456.2:47372419-47404499	MALR1	3.56015	0.081468
AG18354_PTR	CM054457.2	chrX_hap1_hsaX	153455463	153472339	CM054457.2:153455463-153472339	PRDM7	2.01165	0.077498
AG18354_PTR	CM054457.2	chrX_hap1_hsaX	153844119	153854328	CM054457.2:153844119-153854328	PLA2G4B	29.4732	0.674441
AG18354_PTR	CM054457.2	chrX_hap1_hsaX	153857026	153878349	CM054457.2:153857026-153878349	SPTN4	0.126597	0.002897
AG18354_PTR	CM054458.2	chrY_hap2_hsaY	41511	47797	CM054458.2:41511-47797	SWAHC	0.727024	0.016637
AG18354_PTR	CM054458.2	chrY_hap2_hsaY	35802731	35881442	CM054458.2:35802731-35881442	PPP2R3B	6.40346	0.152524
AG18354_PTR	CM054458.2	chrY_hap2_hsaY	35971193	36435950	CM054458.2:35971193-36435950	MALR1	25.0164	0.572456
AG18354_PTR	CM068905.1	chr2_hap1_hsa3	3769730	3785516	CM068905.1:3769730-3785516	SPTN4	3.28121	0.075085
AG18354_PTR	CM068905.1	chr2_hap1_hsa3	3787326	3797580	CM068905.1:3787326-3797580	PLA2G4B	43.7839	1.00533
AG18354_PTR	CM068905.1	chr2_hap1_hsa3	200824851	200834988	CM068905.1:200824851-200834988	MYLK2	10.8279	0.247778
AG18354_PTR	CM068905.1	chr2_hap1_hsa3	201332780	201407828	CM068905.1:201332780-201407828	TRI52	28.9136	0.661637
AG18354_PTR	CM068905.1	chr2_hap1_hsa3	201332876	201339548	CM068905.1:201332876-201339548	TRIM52	206.416	6.63885
AG18354_PTR	CM068906.1	chr23_hap1_hsa22	8530044	8533626	CM068906.1:8530044-8533626	SWAHC	0	0
AG18354_PTR	CM068906.1	chr23_hap1_hsa22	11612421	11618681	CM068906.1:11612421-11618681	MYO5B	0	0
AG18354_PTR	CM068906.1	chr23_hap1_hsa22	52956382	52966649	CM068906.1:52956382-52966649	PLA2G4B	183.631	4.2155
AG18354_PTR	CM068906.1	chr23_hap1_hsa22	52967636	52994885	CM068906.1:52967636-52994885	SPTN4	1.62786	0.037251
Jim_GGO	CM055446.2	chr1_pat_hsa1	6616903	6772848	CM055446.2:6616903-6772848	LMBR1	22.0755	13.9927
Jim_GGO	CM055446.2	chr1_pat_hsa1	6826725	6852932	CM055446.2:6826725-6852932	NOM1	154.219	6.5194
Jim_GGO	CM055446.2	chr1_pat_hsa1	6827743	6851127	CM055446.2:6827743-6851127	NOM1	154.219	6.5194
Jim_GGO	CM055446.2	chr1_pat_hsa1	241089773	241112760	CM055446.2:241089773-241112760	MORN3	0.706064	0.082819
Jim_GGO	CM055446.2	chr1_pat_hsa1	241270825	241337342	CM055446.2:241270825-241337342	S35F5	2.72928	1.95057
Jim_GGO	CM055449.2	chr3_pat_hsa4	7941813	7965355	CM055449.2:7941813-7965355	S35F5	16.976	4.2913
Jim_GGO	CM055449.2	chr3_pat_hsa4	8159392	8175283	CM055449.2:8159392-8175283	NDUFA8	176.168	5.31481
Jim_GGO	CM055449.2	chr3_pat_hsa4	8175371	8190346	CM055449.2:8175371-8190346	MORN3	3.13871	0.459522
Jim_GGO	CM055449.2	chr3_pat_hsa4	210925848	211044182	CM055449.2:210925848-211044182	TTL11	35.6499	20.9649
Jim_GGO	CM055449.2	chr3_pat_hsa4	211084534	211100410	CM055449.2:211084534-211100410	NDUFA8	1320.89	39.85
Jim_GGO	CM055449.2	chr3_pat_hsa4	211100502	211115480	CM055449.2:211100502-211115480	MORN3	6.03438	1.52499
Jim_GGO	CM055449.2	chr3_pat_hsa4	212203309	212235112	CM055449.2:212203309-212235112	S35F5	0.755785	0.03101
Jim_GGO	CM055449.2	chr3_pat_hsa4	212285009	212300848	CM055449.2:212285009-212300848	RABL2B	50.4631	3.48306
Jim_GGO	CM055449.2	chr3_pat_hsa4	212285014	212300835	CM055449.2:212285014-212300835	RAB2B	50.4631	3.48306
Jim_GGO	CM055451.2	chr5_mat_hsa6	17646523	17653141	CM055451.2:17646523-17653141	S35F5	3.55077	0.350425
Jim_GGO	CM055451.2	chr5_mat_hsa6	17654904	17663562	CM055451.2:17654904-17663562	S35F5	1.02806	0.031019
Jim_GGO	CM055451.2	chr5_mat_hsa6	195363161	195378205	CM055451.2:195363161-195378205	MORN3	1.95075	0.242647
Jim_GGO	CM055451.2	chr5_mat_hsa6	195494815	195534834	CM055451.2:195494815-195534834	S35F5	12.3827	1.64356
Jim_GGO	CM055452.2	chr6_mat_hsa7	6638908	6662280	CM055452.2:6638908-6662280	S35F5	3.0833	0.535566
Jim_GGO	CM055452.2	chr6_mat_hsa7	6798592	6813640	CM055452.2:6798592-6813640	MORN3	0.403482	0.038348
Jim_GGO	CM055452.2	chr6_mat_hsa7	168757424	168782941	CM055452.2:168757424-168782941	MORN3	0.479074	0.063431
Jim_GGO	CM055452.2	chr6_mat_hsa7	168783045	168798867	CM055452.2:168783045-168798867	NDUFA8	271.21	8.18214
Jim_GGO	CM055452.2	chr6_mat_hsa7	169003349	169027002	CM055452.2:169003349-169027002	S35F5	1.88218	0.272168
Jim_GGO	CM055453.2	chr7_pat_hsa8	4509379	4526677	CM055453.2:4509379-4526677	S35F5	0.177062	0.009281
Jim_GGO	CM055453.2	chr7_pat_hsa8	150898243	150974038	CM055453.2:150898243-150974038	DERPC	6.89734	3.99039
Jim_GGO	CM055453.2	chr7_pat_hsa8	151094105	151120835	CM055453.2:151094105-151120835	S35F5	38.7741	6.76543
Jim_GGO	CM055454.2	chr8_pat_hsa10	8357389	8424886	CM055454.2:8357389-8424886	S35F5	6.76767	2.66949
Jim_GGO	CM055454.2	chr8_pat_hsa10	8586770	8602447	CM055454.2:8586770-8602447	NDUFA8	1447.86	43.6805
Jim_GGO	CM055454.2	chr8_pat_hsa10	8602344	8627581	CM055454.2:8602344-8627581	MORN3	1447.86	43.6805
Jim_GGO	CM055454.2	chr8_pat_hsa10	8659069	8900348	CM055454.2:8659069-8900348	ARHGP	28.953	19.3508
Jim_GGO	CM055454.2	chr8_pat_hsa10	146254001	146259723	CM055454.2:146254001-146259723	MORN3	0.017299	0.000522
Jim_GGO	CM055454.2	chr8_pat_hsa10	146397560	146451489	CM055454.2:146397560-146451489	S35F5	15.3845	4.37056
Jim_GGO	CM055455.2	chr9_pat_hsa11	5504062	5700660	CM055455.2:5504062-5700660	S35F5	10.8296	2.309
Jim_GGO	CM055455.2	chr9_pat_hsa11	5828659	5843637	CM055455.2:5828659-5843637	MORN3	1.99473	0.160213
Jim_GGO	CM055455.2	chr9_pat_hsa11	144109387	144117482	CM055455.2:144109387-144117482	MORN3	0.628582	0.03176
Jim_GGO	CM055455.2	chr9_pat_hsa11	144153221	144176629	CM055455.2:144153221-144176629	S35F5	2.87821	0.328805
Jim_GGO	CM055456.2	chr10_mat_hsa12	15550774	15581881	CM055456.2:15550774-15581881	S35F5	5.67166	1.14117
Jim_GGO	CM055456.2	chr10_mat_hsa12	149310131	149325027	CM055456.2:149310131-149325027	MORN3	0.798819	0.024143
Jim_GGO	CM055456.2	chr10_mat_hsa12	149459603	149482994	CM055456.2:149459603-149482994	S35F5	1.14556	0.064373
Jim_GGO	CM055457.2	chr11_mat_hsa2b	15131672	15147538	CM055457.2:15131672-15147538	RABL2B	83.167	5.4271
Jim_GGO	CM055457.2	chr11_mat_hsa2b	144691596	144721773	CM055457.2:144691596-144721773	DERPC	4.71194	0.570268
Jim_GGO	CM055457.2	chr11_mat_hsa2b	144779454	144823106	CM055457.2:144779454-144823106	RHDF2	6.69238	4.67462
Jim_GGO	CM055458.2	chr12_pat_hsa2a	140384996	140399970	CM055458.2:140384996-140399970	MORN3	1.68534	0.27291
Jim_GGO	CM055458.2	chr12_pat_hsa2a	140515187	140533663	CM055458.2:140515187-140533663	S35F5	2.98187	0.264918
Jim_GGO	CM055458.2	chr12_pat_hsa2a	140533758	140543612	CM055458.2:140533758-140543612	S35F5	5.30137	0.614489
Jim_GGO	CM055458.2	chr12_pat_hsa2a	140592912	140608776	CM055458.2:140592912-140608776	RABL2B	102.89	4.02428
Jim_GGO	CM055458.2	chr12_pat_hsa2a	140592917	140608774	CM055458.2:140592917-140608774	RAB2B	102.89	4.02428
Jim_GGO	CM055459.2	chr13_pat_hsa9	30795	43365	CM055459.2:30795-43365	FGFR3	1.9729	0.05952
Jim_GGO	CM055459.2	chr13_pat_hsa9	107792	131267	CM055459.2:107792-131267	C1QT4	0.853467	0.083459
Jim_GGO	CM055459.2	chr13_pat_hsa9	171179	176554	CM055459.2:171179-176554	TINCR	0	0
Jim_GGO	CM055460.2	chr14_pat_hsa13	29697	42045	CM055460.2:29697-42045	FGFR3	2.03444	0.061377
Jim_GGO	CM055460.2	chr14_pat_hsa13	106460	129937	CM055460.2:106460-129937	C1QT4	0.469929	0.014177
Jim_GGO	CM055460.2	chr14_pat_hsa13	169782	175143	CM055460.2:169782-175143	TINCR	0	0
Jim_GGO	CM055461.2	chr15_pat_hsa14	124625994	124648814	CM055461.2:124625994-124648814	MORN3	3.35051	0.752574
Jim_GGO	CM055461.2	chr15_pat_hsa14	124648902	124664759	CM055461.2:124648902-124664759	NDUFA8	724.994	21.8723
Jim_GGO	CM055461.2	chr15_pat_hsa14	124855065	124881525	CM055461.2:124855065-124881525	S35F5	5.39908	0.543068
Jim_GGO	CM055462.2	chr16_pat_hsa15	103724606	103747395	CM055462.2:103724606-103747395	MORN3	1.16481	0.044613
Jim_GGO	CM055462.2	chr16_pat_hsa15	103747514	103763364	CM055462.2:103747514-103763364	NDUFA8	550.105	16.5961
Jim_GGO	CM055462.2	chr16_pat_hsa15	103963658	103995862	CM055462.2:103963658-103995862	S35F5	21.5747	0.760164
Jim_GGO	CM055463.2	chr17_mat_hsa18	30803	43184	CM055463.2:30803-43184	FGFR3	2.0977	0.063285
Jim_GGO	CM055463.2	chr17_mat_hsa18	107605	131090	CM055463.2:107605-131090	C1QT4	0.207443	0.008694
Jim_GGO	CM055463.2	chr17_mat_hsa18	142723	155018	CM055463.2:142723-155018	AMACR	0.826122	0.024923
Jim_GGO	CM055463.2	chr17_mat_hsa18	171005	176382	CM055463.2:171005-176382	TINCR	0	0
Jim_GGO	CM055463.2	chr17_mat_hsa18	109987985	110003143	CM055463.2:109987985-110003143	MORN3	0.871232	0.123629
Jim_GGO	CM055463.2	chr17_mat_hsa18	110132872	110200377	CM055463.2:110132872-110200377	S35F5	14.3983	3.59308
Jim_GGO	CM055464.2	chr18_pat_hsa16	3666251	3673420	CM055464.2:3666251-3673420	POLR3K	370.883	15.2973
Jim_GGO	CM055464.2	chr18_pat_hsa16	120770931	121178437	CM055464.2:120770931-121178437	DERPC	20.8609	27.8836
Jim_GGO	CM055464.2	chr18_pat_hsa16	121222170	121237113	CM055464.2:121222170-121237113	MORN3	2.47136	0.293379
Jim_GGO	CM055464.2	chr18_pat_hsa16	121237205	121252795	CM055464.2:121237205-121252795	NDUFA8	780.176	23.5371
Jim_GGO	CM055464.2	chr18_pat_hsa16	121448635	121472857	CM055464.2:121448635-121472857	S35F5	30.8685	5.46836
Jim_GGO	CM055465.2	chr19_pat_hsa5x17	15287729	15308351	CM055465.2:15287729-15308351	S35F5	16.0012	0.6839
Jim_GGO	CM055465.2	chr19_pat_hsa5x17	111657576	111691159	CM055465.2:111657576-111691159	TPPP	1838.36	126.232
Jim_GGO	CM055465.2	chr19_pat_hsa5x17	112714236	112729131	CM055465.2:112714236-112729131	MORN3	0.350855	0.013206
Jim_GGO	CM055465.2	chr19_pat_hsa5x17	112863784	112887174	CM055465.2:112863784-112887174	S35F5	1.42102	0.132715
Jim_GGO	CM055466.2	chr20_mat_hsa19	5439622	5492772	CM055466.2:5439622-5492772	S35F5	4.79267	0.747042
Jim_GGO	CM055466.2	chr20_mat_hsa19	69922771	69944010	CM055466.2:69922771-69944010	ZN133	24.876	1.95801
Jim_GGO	CM055466.2	chr20_mat_hsa19	70671146	70761775	CM055466.2:70671146-70761775	DERPC	15.0879	2.71295
Jim_GGO	CM055466.2	chr20_mat_hsa19	70803620	70818564	CM055466.2:70803620-70818564	MORN3	7.57981	1.08242
Jim_GGO	CM055469.2	chrX_mat_hsaX	166247326	166260939	CM055469.2:166247326-166260939	NEMO	26.7327	3.2488
Jim_GGO	CM055469.2	chrX_mat_hsaX	167631625	167657962	CM055469.2:167631625-167657962	S35F5	3.13023	0.633498
Jim_GGO	CM068950.1	chr2_pat_hsa3	9337958	9353601	CM068950.1:9337958-9353601	NDUFA8	542.755	16.3744
Jim_GGO	CM068950.1	chr2_pat_hsa3	9353693	9368684	CM068950.1:9353693-9368684	MORN3	1.42643	0.123675
Jim_GGO	CM068950.1	chr2_pat_hsa3	211640816	211655880	CM068950.1:211640816-211655880	MORN3	3.14862	0.625084
Jim_GGO	CM068950.1	chr2_pat_hsa3	211818311	211838549	CM068950.1:211818311-211838549	S35F5	4.6238	0.459492
Jim_GGO	CM068951.1	chr23_mat_hsa22	48817507	48831988	CM068951.1:48817507-48831988	RABL2A	457.482	22.1039
PR00251_PPA	CM055472.2	chr1_pat_hsa1	16367	39645	CM055472.2:16367-39645	F157B	101.687	4.54582
PR00251_PPA	CM055472.2	chr1_pat_hsa1	946200	961628	CM055472.2:946200-961628	O2T12	20.3046	0.737817
PR00251_PPA	CM055472.2	chr1_pat_hsa1	1850161	1873702	CM055472.2:1850161-1873702	ZN682	29.9207	5.35224
PR00251_PPA	CM055472.2	chr1_pat_hsa1	227456287	227503126	CM055472.2:227456287-227503126	ZNG1A	133.76	64.8495
PR00251_PPA	CM055475.2	chr3_pat_hsa4	1428858	1431426	CM055475.2:1428858-1431426	RWDD3	0	0
PR00251_PPA	CM055475.2	chr3_pat_hsa4	188325927	188355337	CM055475.2:188325927-188355337	OR4K3	62.7766	19.1576
PR00251_PPA	CM055475.2	chr3_pat_hsa4	188354504	188415734	CM055475.2:188354504-188415734	ZNG1A	100.61	49.065
PR00251_PPA	CM055475.2	chr3_pat_hsa4	188483383	188492006	CM055475.2:188483383-188492006	PRDM7	10.2429	2.00851
PR00251_PPA	CM055476.2	chr4_mat_hsa5	106165	113256	CM055476.2:106165-113256	PRDM7	0	0
PR00251_PPA	CM055476.2	chr4_mat_hsa5	179276	226132	CM055476.2:179276-226132	ZNG1A	77.0381	16.8226
PR00251_PPA	CM055476.2	chr4_mat_hsa5	496475	523056	CM055476.2:496475-523056	BCL9	0	0
PR00251_PPA	CM055476.2	chr4_mat_hsa5	937688	1022698	CM055476.2:937688-1022698	ZDH11	15.0266	14.2739
PR00251_PPA	CM055476.2	chr4_mat_hsa5	1723740	1727600	CM055476.2:1723740-1727600	AB17A	0.715877	0.026013
PR00251_PPA	CM055477.2	chr5_pat_hsa6	190914310	190957323	CM055477.2:190914310-190957323	ZNG1A	67.6664	11.424
PR00251_PPA	CM055477.2	chr5_pat_hsa6	191030325	191033257	CM055477.2:191030325-191033257	PRDM7	6.43675	0.404065
PR00251_PPA	CM055478.2	chr6_mat_hsa7	120361728	120373140	CM055478.2:120361728-120373140	SPDE2	9.50867	0.345521
PR00251_PPA	CM055478.2	chr6_mat_hsa7	140107213	140117430	CM055478.2:140107213-140117430	S10AB	220.232	8.00266
PR00251_PPA	CM055478.2	chr6_mat_hsa7	196168422	196211103	CM055478.2:196168422-196211103	ZNG1A	39.6667	4.90935
PR00251_PPA	CM055479.2	chr7_pat_hsa8	162589197	162596463	CM055479.2:162589197-162596463	FSCB	6.94442	0.316015
PR00251_PPA	CM055479.2	chr7_pat_hsa8	162672307	162678834	CM055479.2:162672307-162678834	PRDM7	2.33759	5.01467
PR00251_PPA	CM055480.2	chr8_mat_hsa10	145866438	145918153	CM055480.2:145866438-145918153	ZNG1A	96.124	28.3687
PR00251_PPA	CM055480.2	chr8_mat_hsa10	145866684	145899979	CM055480.2:145866684-145899979	CBWD1	96.124	16.9097
PR00251_PPA	CM055480.2	chr8_mat_hsa10	146343038	146358954	CM055480.2:146343038-146358954	DB125	48.8398	7.47138
PR00251_PPA	CM055480.2	chr8_mat_hsa10	146747075	146776468	CM055480.2:146747075-146776468	OR4K3	13.7768	2.70092
PR00251_PPA	CM055480.2	chr8_mat_hsa10	146775641	146834967	CM055480.2:146775641-146834967	ZNG1A	56.8068	40.1522
PR00251_PPA	CM055480.2	chr8_mat_hsa10	146888999	146895513	CM055480.2:146888999-146895513	PRDM7	9.63436	1.03036
PR00251_PPA	CM055482.2	chr10_mat_hsa12	141450578	141460657	CM055482.2:141450578-141460657	G3ST3	6.46617	0.234964
PR00251_PPA	CM055482.2	chr10_mat_hsa12	141460755	141470034	CM055482.2:141460755-141470034	NEUR4	2.32857	0.23414
PR00251_PPA	CM055482.2	chr10_mat_hsa12	141460802	141470033	CM055482.2:141460802-141470033	NEU4	2.32857	0.23414
PR00251_PPA	CM055482.2	chr10_mat_hsa12	141680808	141691814	CM055482.2:141680808-141691814	PRDM7	2.70704	0.162635
PR00251_PPA	CM055483.2	chr11_mat_hsa9	104772	111868	CM055483.2:104772-111868	PRDM7	3.35212	0.25592
PR00251_PPA	CM055483.2	chr11_mat_hsa9	164934	207870	CM055483.2:164934-207870	ZNG1A	50.939	5.07666
PR00251_PPA	CM055483.2	chr11_mat_hsa9	223222	252785	CM055483.2:223222-252785	OR4K3	68.0089	11.1369
PR00251_PPA	CM055483.2	chr11_mat_hsa9	626933	661167	CM055483.2:626933-661167	DB125	0	0
PR00251_PPA	CM055483.2	chr11_mat_hsa9	1023075	1026588	CM055483.2:1023075-1026588	AB17A	235.344	43.7169
PR00251_PPA	CM055483.2	chr11_mat_hsa9	124635585	124644207	CM055483.2:124635585-124644207	PRDM7	3.00209	1.20308
PR00251_PPA	CM055484.2	chr12_mat_hsa2a	14620093	14622804	CM055484.2:14620093-14622804	CHAP1	5.09218	0.41473
PR00251_PPA	CM055486.2	chr14_pat_hsa13	45986039	45988125	CM055486.2:45986039-45988125	RCN1	84.069	3.05486
PR00251_PPA	CM055486.2	chr14_pat_hsa13	115867844	115910792	CM055486.2:115867844-115910792	ZNG1A	87.1516	34.5499
PR00251_PPA	CM055486.2	chr14_pat_hsa13	115935655	116073008	CM055486.2:115935655-116073008	TBCD	0	0
PR00251_PPA	CM055487.2	chr15_mat_hsa14	108117434	108137825	CM055487.2:108117434-108137825	F157B	7.13888	0.259409
PR00251_PPA	CM055487.2	chr15_mat_hsa14	108364654	108378846	CM055487.2:108364654-108378846	PRDM7	0.750229	0.25791
PR00251_PPA	CM055487.2	chr15_mat_hsa14	108410391	108436167	CM055487.2:108410391-108436167	F157B	5.72274	0.20795
PR00251_PPA	CM055488.2	chr16_pat_hsa15	4884838	4992322	CM055488.2:4884838-4992322	TEKT1	30.1875	57.3815
PR00251_PPA	CM055490.2	chr18_pat_hsa16	75213	88978	CM055490.2:75213-88978	PRDM7	0	0
PR00251_PPA	CM055490.2	chr18_pat_hsa16	100255489	100284917	CM055490.2:100255489-100284917	OR4K3	42.4124	15.148
PR00251_PPA	CM055490.2	chr18_pat_hsa16	100307333	100340698	CM055490.2:100307333-100340698	CBWD5	83.9028	13.0106
PR00251_PPA	CM055490.2	chr18_pat_hsa16	100307369	100354739	CM055490.2:100307369-100354739	ZNG1A	89.9004	30.2979
PR00251_PPA	CM055492.2	chr20_pat_hsa19	64866179	64876449	CM055492.2:64866179-64876449	CHAP1	68.1287	2.47563
PR00251_PPA	CM055495.2	chrX_mat_hsaX	91010	111582	CM055495.2:91010-111582	PLCX3	61.992	4.04164
PR00251_PPA	CM055495.2	chrX_mat_hsaX	1221516	1265401	CM055495.2:1221516-1265401	IL3RA	11.4501	0.416067
PR00251_PPA	CM055495.2	chrX_mat_hsaX	1224406	1262452	CM055495.2:1224406-1262452	IL3RA	11.4501	0.416067
PR00251_PPA	CM055495.2	chrX_mat_hsaX	1486437	1497468	CM055495.2:1486437-1497468	AK17A	95.9501	4.73068
PR00251_PPA	CM055495.2	chrX_mat_hsaX	1486439	1497468	CM055495.2:1486439-1497468	AKAP17A	95.9501	4.73068
PR00251_PPA	CM055495.2	chrX_mat_hsaX	156426411	156452347	CM055495.2:156426411-156452347	PRDM7	10.7541	0.947514
PR00251_PPA	CM055495.2	chrX_mat_hsaX	156484214	156570191	CM055495.2:156484214-156570191	FSCB	1.52874	1.01272
PR00251_PPA	CM055496.2	chrY_pat_hsaY	73076	93334	CM055496.2:73076-93334	PRDM7	0.569031	0.065856
PR00251_PPA	CM055496.2	chrY_pat_hsaY	45668141	45674136	CM055496.2:45668141-45674136	SLC25A6	9451.26	359.086
PR00251_PPA	CM055496.2	chrY_pat_hsaY	46784162	46845604	CM055496.2:46784162-46845604	PPP2R3B	8.95274	2.61487
PR00251_PPA	CM055496.2	chrY_pat_hsaY	46858827	46872179	CM055496.2:46858827-46872179	GTPBP6	315.622	11.4689
PR00251_PPA	CM055496.2	chrY_pat_hsaY	46873352	46897697	CM055496.2:46873352-46897697	PLCX3	44.8663	6.54071
PR00251_PPA	CM055496.2	chrY_pat_hsaY	46881595	46897730	CM055496.2:46881595-46897730	PLCXD1	30.3832	1.34699
						Average	157.216	8.58057

## Sheet: 7
Class	GO term	Reference genes	Observed number of genes	Expected number of genes	Over/under representation	Fold enrichment	p-value
Biological process	defense response to symbiont (GO:0140546)	916	7	2.71	+	2.58	0.0182
Biological process	defense response to other organism (GO:0098542)	1022	7	3.03	+	2.31	0.0308
Biological process	response to virus (GO:0009615)	373	5	1.1	+	4.53	0.00492
Biological process	response to chemical (GO:0042221)	3780	5	11.2	-	0.45	0.0451
Biological process	establishment of organelle localization (GO:0051656)	412	4	1.22	+	3.28	0.0337
Biological process	defense response to virus (GO:0051607)	272	4	0.81	+	4.96	0.00862
Biological process	lipid catabolic process (GO:0016042)	306	4	0.91	+	4.41	0.0129
Biological process	anatomical structure maturation (GO:0071695)	238	3	0.71	+	4.26	0.0336
Biological process	cellular lipid catabolic process (GO:0044242)	205	3	0.61	+	4.94	0.0229
Biological process	regulation of protein polymerization (GO:0032271)	204	3	0.6	+	4.96	0.0226
Biological process	response to organic substance (GO:0010033)	2467	2	7.31	-	0.27	0.0296
Biological process	glycolipid metabolic process (GO:0006664)	109	2	0.32	+	6.19	0.0415
Biological process	regulation of protein sumoylation (GO:0033233)	24	2	0.07	+	28.13	0.00228
Biological process	negative regulation of protein polymerization (GO:0032272)	74	2	0.22	+	9.12	0.0203
Biological process	skeletal muscle cell differentiation (GO:0035914)	60	2	0.18	+	11.25	0.0137
Biological process	oligosaccharide metabolic process (GO:0009311)	68	2	0.2	+	9.93	0.0173
Biological process	liposaccharide metabolic process (GO:1903509)	110	2	0.33	+	6.14	0.0422
Molecular function	polyubiquitin modification-dependent protein binding (GO:0031593)	58	2	0.17	+	11.64	0.0128
Molecular function	phosphoric diester hydrolase activity (GO:0008081)	87	2	0.26	+	7.76	0.0275
Molecular function	signaling adaptor activity (GO:0035591)	113	2	0.33	+	5.97	0.0443
Molecular function	GTP binding (GO:0005525)	386	6	1.14	+	5.25	0.000972
Molecular function	GTPase activity (GO:0003924)	338	5	1	+	4.99	0.00324
Molecular function	guanyl nucleotide binding (GO:0019001)	407	6	1.21	+	4.98	0.00128
Molecular function	guanyl ribonucleotide binding (GO:0032561)	407	6	1.21	+	4.98	0.00128
Molecular function	purine ribonucleotide binding (GO:0032555)	1910	11	5.66	+	1.94	0.026
Molecular function	ribonucleotide binding (GO:0032553)	1927	11	5.71	+	1.93	0.0272
Molecular function	purine nucleotide binding (GO:0017076)	2014	11	5.97	+	1.84	0.0471
Molecular function	hydrolase activity (GO:0016787)	2473	13	7.33	+	1.77	0.0447
Molecular function	catalytic activity (GO:0003824)	5679	24	16.82	+	1.43	0.0446
Cellular component	adherens junction (GO:0005912)	189	3	0.56	+	5.36	0.0186
Cellular component	supramolecular fiber (GO:0099512)	1058	7	3.13	+	2.23	0.0362
Cellular component	supramolecular polymer (GO:0099081)	1066	7	3.16	+	2.22	0.0375
